# Supplementary material for: Strong constitutive NF-κB signaling in B cells drives SLL/CLL-like lymphomagenesis and overcomes microenvironmental dependencies
Source: Springer Nature journal article supplement (doi:10.1038/s41375-025-02844-8), 2026-01-16
Supplement: MOESM1 [file 41375_2025_2844_MOESM1_ESM.pdf › 41375_2025_2844_MOESM1_ESM.pdf]

## **Supplementary Information**

### **Supplementary Figures**

#### **Supplementary Figure S1**

Effects of B cell specific constitutive IKK2 signaling in young mice

#### **Supplementary Figure S2**

Constitutive IKK2 activity induces lymphomagenesis in a dose-dependent manner

#### **Supplementary Figure S3**

Ki-67 staining of IKK2ca-driven lymphomas reveals variable proliferative activity

#### **Supplementary Figure S4**

B cell-intrinsic and -extrinsic consequences of synergistic effects of IKK2ca and TCL1 co-expression

#### **Supplementary Figure S5**

Transcriptomic and chromosomal analysis of IKK2ca/ca- and TCL1-expressing lymphomas

#### **Supplementary Figure S6**

Competitive advantage of B1a cells expressing IKK2ca, alone and in combination with TCL1

#### **Supplementary Figure S7**

IKK2ca/ca-expressing TCL1tg CLL cells engraft in PKC $\beta$ -deficient mice

### **Supplementary Tables**

#### **Supplementary Table S1**

Resources (primers and antibodies)

#### **Supplementary Table S2**

Statistical analyses of all Figures

#### **Supplementary Table S3**

Gene signatures used for GSEA and GSEA results

#### **Supplementary Table S4**

Differentially expressed genes in spleen and peritoneal cavity of young mice

#### **Supplementary Table S5**

IgH VDJ rearrangement analyses by PCR-cloning-sequencing and BCR RNA sequencing

#### **Supplementary Table S6**

Differentially expressed genes in lymphomas of aged mice
