# Supplementary material for: Strong constitutive NF-κB signaling in B cells drives SLL/CLL-like lymphomagenesis and overcomes microenvironmental dependencies
Source: Leukemia. 2026 Jan 16;40(3):522–39. doi: 10.1038/s41375-025-02844-8 (PMC12960208; doi:10.1038/s41375-025-02844-8)
Supplement: Supplementary file 5 — Supplemental Table 3 GSEA [file 41375_2025_2844_MOESM5_ESM.xlsx]

## Sheet: S3A
Suppl Table S3A NFkB gene signatures and CLL gene signatures used for GSEA
collecTRI	Heise	Zhao	CHIPCHIP_Young_all	OCILy3_Ly10	BCR_paper	HBL1	Herishanu_NFkB	Herishanu_LN_general	Herishanu_E2F	CLL-PD mTORC1 signaling genes	CLL-PD MYC target genes	CLL-PD OxPhos	CLL-C2
decoupleR::collecTRI package, selection of Nfkb1, Nfkb2, Rela, Relb, Rel targets	Heise et al. (2014) Germinal center B cell maintenance and differentiation are controlled by distinct NF-kB transcription factor subunits	Zhao et al. (2023) NF-κB subunits direct kinetically distinct transcriptional cascades in antigen receptor- activated B cells. Supplemented by 10 additional NFkB targets: Cd40, Rela, Relb, Nfkb2, Birc3, Cd80, Fcer2, Tnfrsf9, Ccl22, Ikbke	Staudt Lab https://lymphochip.nih.gov/signaturedb/ from Schreiber et al. PNAS 2006 103:5899-5904	Staudt Lab https://lymphochip.nih.gov/signaturedb/ from Lam et al. Clinical Cancer Research 11:1 (2005); Lam et al. Blood 111:3701 (2008)	Staudt Lab https://lymphochip.nih.gov/signaturedb/ from Davis et al. Nature 2010 463:88-92	Staudt Lab https://lymphochip.nih.gov/signaturedb/ from Ngo et al. Nature. 2011 470(7332):115-9	Herishanu et al. (2011) The lymph node microenvironment promotes B-cell receptor signaling, NF-kappaBactivation, and tumor proliferation in chronic lymphocytic leukemia (significantly upregulated NFkB target genes in lymph nodes compared to peripheral blood of CLL patients)	Herishanu et al. (2011) The lymph node microenvironment promotes B-cell receptor signaling, NF-kappaBactivation, and tumor proliferation in chronic lymphocytic leukemia (significantly upregulated genes in lymph nodes compared to peripheral blood of CLL patients)	Herishanu et al. (2011) The lymph node microenvironment promotes B-cell receptor signaling, NF-kappaBactivation, and tumor proliferation in chronic lymphocytic leukemia (significantly upregulated E2F targets in lymph nodes compared to peripheral blood of CLL patients)	Lu et al. (2021) Multi-omics reveals clinically relevant proliferative drive associated with mTOR-MYC-OXPHOS activity in chronic lymphocytic leukemia. (significantly upregulated mTORC1 signaling genes in CLL with proliferative drive)	Lu et al. (2021) Multi-omics reveals clinically relevant proliferative drive associated with mTOR-MYC-OXPHOS activity in chronic lymphocytic leukemia. (significantly upregulated MYC targets in CLL with proliferative drive)	Lu et al. (2021) Multi-omics reveals clinically relevant proliferative drive associated with mTOR-MYC-OXPHOS activity in chronic lymphocytic leukemia. (significantly upregulated oxidative phosphorylation genes in CLL with proliferative drive)	Ferreire et al. (2014) Transcriptome characterization by RNA sequencing identifies a major molecular and clinical subdivision in chronic lymphocytic leukemia. (significantly upregulated genes in the poor prognosis cluster C2)
9530003J23Rik	1190002F15Rik	0610010K14Rik	Abhd8	Ahr	Abtb2	Abtb2	BCL2A1	AICDA	CDC2	ACLY	ABCE1	ACADM	AC008440.5
A2m	2010317E24Rik	1110059E24Ri	Actr3	Batf	Adam8	Adad2	CCL3	AURKA	CDC25A	ACTR2	ACP1	AFG3L2	AC011487.1
Abca1	2610002D18Rik	1110059E24Rik	Aftph	Bcl2a1	B3gnt7	Adam8	CCL4	AURKB	CDC45L	ACTR3	APEX1	ALAS1	AC093484.6
Abcb1a	2810417H13Rik	1810037I17Rik	Aim2	Bcl2l1	Batf	Adgre1	CCND2	BIRC5	CDC6	ASNS	C1QBP	ATP5A1	AC104134.2
Abcg2	4930547N16Rik	4632428N05Rik	Alas1	Birc3	Batf3	Anp32ap1	CD83	BUB1	CDCA7	ATP2A2	CANX	ATP5B	AC138128.1
Abl1	4931417G12Rik	8C035044	Ap1S2	Ccl22	Bcl2a1	Anp32d	CXCL10	CCL3	CDT1	ATP5G1	CBX3	ATP5C1	ACSM3
Ache	5730590G19Rik	9130401M01Rik	Apbb1Ip	Ccl3	Bcl2l1	Apbb2	CXCL13	CCL4	EZH2	ATP6V1D	CCNA2	ATP5F1	ADNP2
Adam12	6530418L21Rik	A93002405Rik	Aqp7	Ccl4	Birc3	Arhgap31	CXCL9	CCNA2	GMNN	AURKA	CCT2	ATP5G1	AKIRIN1
Adamts5	9030617O03Rik	Aatf	Arf3	Ccnd2	C10orf10	B3gnt7	DUSP2	CCNB1	HIST1H3A	BCAT1	CCT3	ATP5G2	AKIRIN2
Adgrg3	9830001H06Rik	Abcc4	Arhgap4	Ccr7	C6orf58	Basp1	EBI2	CCNB2	IL4I1	BHLHE40	CCT4	ATP5G3	AL162497.1
Adora1	A330009N23Rik	Actg1	Arhgef2	Cd40	Cd40	Batf	EBI3	CCND2	KIAA0101	BUB1	CCT5	ATP5H	AMD1
Adora2a	Adm	Adcy7	Arhgef39	Cd44	Cd80	Batf3	GADD45B	CCNL1	MCM4	CACYBP	CCT7	ATP5J	ARCN1
Adora3	Agrn	Adgre1	Arl1	Cd83	Ctu1	Bax	HEATR1	CD69	MCM6	CANX	CDC45	ATP5J2	ARF4
Adra1d	AI607873	Adk	Arl6Ip5	Cflar	Dusp2	Bbc3	ID2	CD83	PCNA	CCNG1	CLNS1A	ATP6V0B	ARID5A
Ager	AI848285	Adm	Ascl1	Cntrl	Duxap10	Bbs5	IL12B	CDC2	RRM2	CCT6A	COPS5	ATP6V0E1	ARL4A
Agr2	AI848285	Aebp2	Asgr2	Cxcl10	Ebi3	Bcl2a1	JUNB	CDC6		CDC25A	COX5A	ATP6V1C1	ARL8B
Agt	AI854703	Ahr	Atf6	Cxcl13	Ece1	Bcl2l1	LTA	CDCA2		COPS5	CYC1	ATP6V1D	ATF3
Ahr	Ak4	Alcam	Atg101	Cxcl9	Elf3	Birc3	NFKBIE	CDT1		CTSC	DDX21	COX11	ATP6V0C
Aire	Akap1	Aldh9a1	Atp5g1	Dusp2	Ervv-1	Btbd19	PBEF1	CENPE		CYB5B	DEK	COX15	B3GNT2
Akip1	Alpl	Amigo2	Bag6	Ebi3	Gadd45b	C10orf10	RGS1	CHEK1		DHCR24	DUT	COX5A	BACH1
Akr1b1	Ankle1	Anp32a	Baz1b	Ell2	Gas6	C17orf51	TNF	CR2		DHCR7	EEF1B2	COX6B1	BAG3
Akt1	Ankrd37	Apex1	Bcl2a1	Fkbp15	Hlf	C6orf58		CTLA4		EDEM1	EIF2S1	COX6C	BCAS2
Akt2	Anln	Arhgap11a	Bcl6	Gadd45b	Icam1	C7orf50		DUSP1		EGLN3	EIF2S2	COX7A2	BCL2A1
Alcam	Apold1	Arhgap39	Bnip1	Gpr183	Ifit1	Ccdc28B		DUSP2		EIF2S2	EIF3J	COX7A2L	BCL6
Alox12	Arl5b	ArI5b	Bpi	Heatr1	Ifit3	Ccnd2		EGR1		ELOVL6	EPRS	COX7C	BHLHE40
Alox5	Armcx4	Arid3a	C21orf59	Icam1	Il10	Ccr7		EGR2		ENO1	ETF1	COX8A	BTG2
Alox5ap	Armcx6	Atf3	C3	Id2	Il4i1	Cct3		EGR3		EPRS	EXOSC7	CYC1	C12orf5
Amh	Asf1b	Atf4	C7orf49	Il10	Irf1	Cd22		FOS		ETF1	G3BP1	CYCS	C13orf15
Amigo2	Asns	Atp5d	Ca11	Il12b	Irf4	Cd36		JUN		FADS1	GNL3	DECR1	C14orf104
Apoe	Aspm	Atp5l	Capg	Il6	Kcnn4	Cd40		JUNB		FDXR	HDAC2	DLAT	C16orf54
Appl1	Atf3	Atp5o	Capza1	Insig1	Kif26b	Cd44		MCM4		GAPDH	HDDC2	DLD	C16orf80
Aqp2	Atxn1	Aurkaip1	Casc4	Irf1	Lat2	Cd80		MCM6		GBE1	HDGF	ECH1	C17orf91
Aqp5	Aurkb	Axl	Cat	Irf4	Linc00926	Cfap46		MKI67		GLRX	HNRNPA2B1	ECHS1	C7orf40
Ar	Axl	B4galt5	Ccdc88a	Junb	Linc01619	Csnk2a1		MYC		GMPS	HNRNPA3	ECI1	C9orf21
Atf3	Axl	B630005N14Rik	Ccl1	Linc00926	Lmo2	Csrp2		PBEF1		HK2	HNRNPC	ETFA	CALR
Atf6	B4galt2	Banf1	Ccl3	Litaf	Lrrc32	Cttn		RGS1		HMBS	HNRNPR	FH	CCDC47
Atm	B4galt4	Batf	Ccl4	Loc154761	Lypla2	Cyb561		TK1		HMGCR	HNRNPU	GLUD1	CCL3
Atp12a	Bag2	Bcl2l1	Ccl5	Lta	Mreg	Cyp2J2		TOP2A		HMGCS1	IMPDH2	HADHA	CCL4
Avp	Baiap2	BC028528	Ccnl1	Lyn	Myo7a	Dennd4a		TTK		HSP90B1	KPNA2	HADHB	CCRN4L
B2m	Bard1	Bcl11a	Ccr1	Marcks	Nde1	Dgat2		TYMS		IMMT	KPNB1	IDH3A	CD55
Bace1	BC030867	Bcl6b	Ccrl2	Mir155hg	Nfkb2	Dnajc25-Gng10				LDHA	LDHA	IMMT	CD69
Bad	BC048355	Bend3	Cd37	Mmp7	Nfkbia	Dram1				M6PR	MCM4	LDHA	CD83
Bag1	BC048355	Bhlhe40	Cd55	Mx1	Ninj1	Dusp2				MCM4	MRPS18B	LDHB	CD97
Bax	Bcl2a1b	BIk	Cd58	Nampt	Ptger4	Ebi3				MTHFD2	MYC	MDH1	CDKN1A
Bcl10	Bcl2a1d	Bin2	Cd69	Ncf2	Rab29	Ece1				MTHFD2L	NCBP1	MDH2	CEBPZ
Bcl2	Bcl2a1d	Birc5	Cdca7L	Ncl	Rasgrp1	Eif5a				NAMPT	NCBP2	MRPL15	CHD1
Bcl2a1	Bcl2l1	Bri3	Cdh15	Nfkb1	Rassf4	Eif5al1				NMT1	NHP2	MRPL35	CHPT1
Bcl2l1	Bcl2l1	Bub1b	Cdkn1a	Nfkb2	Rftn1	Eloa				PDK1	NME1	MRPS11	CITED2
Bcl2l11	Birc5	Cacybp	Cfap20	Nfkbia	Rgs16	Eno1				PIK3R3	NPM1	MRPS15	CKS2
Bcl3	Bmp1	Canx	Cfb	Nfkbie	Ripor2	Ephb1				PITPNB	PA2G4	MTRR	CLK1
Bclaf1	Bmp1	Capg	Chi3L2	Pim1	Rnf183	Epsti1				PNP	PABPC1	MTX2	COQ10B
Bcr	Bmp6	Casp4	Clcn1	Plek	Sgk1	Ervv-1				PPA1	PHB	NDUFA4	CREM
Bdkrb1	Brca1	Cbx1	Clec10a	Rasgrp1	Sgpp2	Eya3				PPIA	PPIA	NDUFA5	CSRNP1
Bdnf	Brip1	Cbx3	Cox4I1	Relb	Sirpa	Fam177a1				PRDX1	PPM1G	NDUFA8	CTD-2013N24.2
Becn1	Bub1	Ccdc124	Creb1	Rgs1	Snx18	Fcrl2				PSMA3	PRDX3	NDUFB1	CXCR5
Bglap	C330027C09Rik	Ccdc50	Cryba1	Ripor2	Socs3	Fcrl4				PSMA4	PSMA4	NDUFB3	CYCS
Bglap2	Cacna1h	Ccl3	Csf2	Samd9l	Specc1	Fez1				PSMB5	PSMA7	NDUFB4	CYP51A1
Bglap3	Car12	Ccnd2	Csf3	Sell	Sstr2	Flvcr1				PSMC4	PSMB2	NDUFB5	CYP51P2
Bgn	Car13	Ccnl1	Cst7	Smarca2	Stat5a	Foxj1				PSMD14	PSMC4	NDUFB6	CYTIP
Bhlhe40	Car2	Ccr1	Ctsc	Socs2	Tmem266	Frmd4a				PSME3	PSMD14	NDUFS2	DBF4
Bhmt	Casc5	Cct8	Cxcl8	Stat1	Tmprss6	Fus				PSMG1	PTGES3	NDUFS4	DDIT3
Birc2	Ccdc102a	Cd274	Cyb5a	Tnf	Tmsb4X	Gadd45b				PSPH	RAD23B	NQO2	DDX21
Birc3	Ccl1	Cd69	Cyp51a1	Tnfaip3	Tnf	Gldc				QDPR	RPL14	OGDH	DEDD2
Birc5	Ccl22	Cd72	Cytor	Traf1	Tnfaip2	Gramd1b				RDH11	RPL22	PRDX3	DHX40
Blk	Ccl3	Cd81	Dbi	Trmt13	Tnfaip3	Grpel1				RPN1	RSL1D1	RETSAT	DNAJA1
Bmp2	Ccna2	Cd83	Dbp	Zfp36l1	Traf1	Hck				RRM2	SERBP1	SDHC	DNAJB1
Bmp4	Ccnb1	Cd86	Ddx21	Znf335	Usp18	Hsd11b2				SEC11A	SNRPD3	SDHD	DNAJB11
Bnip3	Ccnb2	Cdc37	Ddx31			Icam1				SKAP2	SRSF1	SLC25A12	DUSP1
Brca2	Ccnd2	Cdk4	Ddx47			Ier3				SQLE	SSBP1	SLC25A20	DUSP10
Brms1	Ccne2	Cenpe	Dgcr6L			Ifi35				SRD5A1	SYNCRIP	SUCLA2	DUSP2
Bst1	Ccnf	Chd4	Dguok			Ifi44l				SSR1	TARDBP	SUCLG1	DUSP4
Btg2	Cd70	Chd7	Dhrs12			Ifih1				STARD4	TFDP1	TIMM13	DUSP5
Btk	Cdc25c	Clk1	Dmap1			Ifit3				STIP1	TYMS	TIMM8B	DUSP8
Calm1	Cdc45	Cnp	Dpp3			Il10				SYTL2	UBE2E1	UQCRB	EGR1
Calm2	Cdc6	Commd1	Dr1			Il12a				TBK1	VDAC1	UQCRC2	EGR2
Calm3	Cdca2	Coro2a	Efemp2			Il4i1				TCEA1	VDAC3	UQCRH	EIF2AK3
Camk4	Cdca3	Crem	Efnb1			Il6				TMEM97	XPOT	VDAC1	EIF4A3
Carm1	Cdca5	Csrnp1	Eif2S3			Irf1				TPI1		VDAC2	ELF1
Casp3	Cdca7l	Ctsc	Elf3			Irf4				TXNRD1		VDAC3	ENC1
Casp8	Cdca8	Cyc1	Elk1			Jmjd8				UBE2D3			ENDOU
Casp9	Cdk1	D17Wsu92e	Elp2			Kcnn4				UCHL5			ETF1
Cav1	Cdk5r1	Dars	Emp3			Kif26b				UFM1			ETV3
Cbs	Cdk5r1	Ddit3	Erap1			Krt18p65							EZH2
Cbx5	Celsr2	Dhrs3	Erbin			Kynu							EZR
Cck	Cenpe	Dhx34	Ercc1			Lactb							FAM100B
Ccl1	Cenpf	Dnaja1	Extl2			Lamp3							FAM102A
Ccl11	Cenph	Dnajc15	Fbxw4p1			Lat2							FAM166A
Ccl12	Cenpi	Dnase2a	Fcamr			Linc00926							FAM43A
Ccl17	Cenpm	Dnmt3a	Fcar			Linc01106							FAM46C
Ccl19	Cenpn	Dtx1	Fcf1			Linc01619							FAM53C
Ccl2	Cenpp	Dusp1	Fen1			Lmo2							FOS
Ccl20	Cenpw	Dusp10	Fermt3			Loc100288570							FOSB
Ccl21a	Cep55	Dusp2	Fhl3			Loc642131							FYTTD1
Ccl21b	Chac1	E2f3	Fibp			Lpcat3							G0S2
Ccl21c	Chaf1a	E330020012Rik	Flot1			Lrg1							G3BP2
Ccl22	Chaf1b	Ebi3	Fut4			Lrrc32							GABARAPL1
Ccl27	Chst1	Egr2	Gabpb2			Ltb							GADD45A
Ccl4	Chst7	Egr3	Gadd45b			Ltb4R2							GADD45B
Ccl5	Cit	Eif2a	Gdf5			Lypla2							GARS
Ccn1	Ckap2	Eif2s2	Gins1			Lysmd2							GEM
Ccn2	Ckap2l	Eif2s3x	Gna15			Map3K8							GLA
Ccnb1	Cks1b	Eif4a1	Gng5			Marcks							GMEB2
Ccnd1	Clspn	Eif5a	Gnl1			Mcm7							GNL3
Ccnd2	Col9a3	EII2	Golph3l			Mindy4							GPR183
Ccne1	Coro2a	Emg1	Gpr132			Mir17hg							GRASP
Ccr2	Cst6	Eno1	Gpr84			Mob3C							GTF2B
Ccr3	Cst7	Epha2	Gpx1			Mreg							H2AFX
Ccr5	Ctdspl	Erf	Gtf3c4			Mrps10							HERPUD1
Ccr7	Cth	Etv6	Gtpbp4			Mrto4							HIF1A
Cd2	D630045J12Rik	Evi2a	Gypc			Mvk							HIPK1
Cd28	Dact3	Evl	Hadha			Myc							HMGCR
Cd38	Depdc1b	Ezh2	Hcst			Myo7a							HMGCS1
Cd3e	Dgat2	Fabp5	Hist1h4I			Myrfl							HSP90AA1
Cd3g	Dhfr	Fam111a	Hist1h4k			Nagpa							HSPA13
Cd4	Dhrs3	Fam129a	Hla-b			Nampt							HSPA1B
Cd40	Dhrs3	Fam167a	Hla-f			Ncf2							HSPA5
Cd40lg	Diap3	Fam213a	Hla-g			Nde1							HSPE1
Cd44	Dmxl2	Fam3c	Hmgn4			Nectin1							HSPH1
Cd46	Dna2	Fam43a	Hnmt			Nfe2L3							ICAM1
Cd69	Dnalc1	Fam76a	Hoxa7			Nfkb1							ID1
Cd74	Dtl	Farsb	Hsp90ab1			Nfkb2							ID3
Cd80	Dusp14	Fas	Hsp90b1			Nfkbia							IDI1
Cd83	Dusp14	Fchsd2	Hspa1b			Ninj1							IDI2-AS1
Cd86	E2f1	Fcmr	Hspa4l			Nob1							IER2
Cd8a	E2f7	Fen1	Icam1			Nosip							IER3
Cdh1	E2f8	Fgr	Icam4			Nr1d1							IER5
Cdk4	Ebi3	Fignl1	Ier3			Nr1d2							IFRD1
Cdk6	Egr4	Flcn	Ifngr1			Osm							IL1B
Cdkn1a	Eme1	Fos	Ift74			Pa2g4							IL6ST
Cdkn2a	Epha2	Fosb	Igflr1			Pdgfrl							IL8
Cdx2	Esco2	Fubp1	Il1b			Pes1							IP6K1
Ceacam1	Espl1	Fyn	Il2Rg			Pik3Cd							IRS2
Ceacam2	Etv4	G3bp1	Il36g			Plagl1							IVNS1ABP
Cebpa	Exo1	Gadd45b	Il6st			Plk3							JMY
Cebpd	F630043A04Rik	Gbp5	Ilk			Pmp22							JOSD1
Cfap20	F9	Gch1	Inhbe			Pnp							JUN
Cfi	Fads1	Gclc	Isoc1			Polr3a							JUNB
Cflar	Fads2	Gem	Itga5			Pou5f1							JUND
Cftr	Fads2	Gfer	Itgax			Prmt1							KDM6B
Chfr	Fads3	Gfi1	Itsn2			Psmd11							KLF10
Chuk	Fam129a	Gid4	Ivns1abp			Psme1							KLF4
Ciita	Fam129a	Glrx3	Jun			Ptger4							KLF6
Ckm	Fam129c	Gm13835	Kiaa0319			Ptges2							KLHL15
Cldn5	Fam129c	Gm6377	Klf15			Ptges3							LMNA
Clpp	Fam20c	Gm9025	Knl1			Rab29							LRRC33
Clpx	Fam46c	Gpr65	Lage3			Rab39a							LY9
Clspn	Fam54a	Grap	Lamtor2			Rasgrp1							LYSMD3
Col10a1	Fam64a	Grhl1	Lgals1			Rassf4							MAFF
Col1a1	Fam72a	Grhpr	Lim2			Rftn1							MAFG
Col1a2	Fam83d	Grn	Limk1			Rgl1							MAP1LC3B
Col2a1	Fanca	Gucd1	Linc00852			Rgs16							MAPK1IP1L
Col7a1	Fancd2	Gypc	Lipt1			Rhebl1							MAPK6
Comt	Fgd2	H2-Eb2	Lmna			Ripor2							MARCH5
Creb1	Fignl1	Hhex	Lrrc19			Rnf121							MEPCE
Crebbp	Foxm1	Hic1	Lrsam1			Rnf183							METRNL
Crh	Gatm	Hilpda	Maip1			Rpl7l1							MFAP1
Crhr1	Gbp1	Hist1h2ah	Man2b1			Rps2							MFSD2A
Crmp1	Gcat	Hist1h2be	Mapk6			Rps6kb2							MGAT2
Crp	Gdap10	Hivep3	Mastl			Samsn1							MIDN
Crygc	Gins2	Hmgn3	Mccc2			Scly							MIR17HG
Csf1	Gjc1	Homer1	Mdh1			Sema7a							MORF4L2
Csf2	Gls2	Hsp90ab1	Mef2b			Sgk1							MTMR6
Csf3	Gm11974	Hsp90b1	Mepce			Sh2d5							MYADM
Csn2	Gng4	Hspa5	Mid1Ip1			Sirpa							NAMPT
Csnk2a1	Gng4	Hspa8	Mis18a			Sirpb1							NDEL1
Csrp1	Gpr176	Hspa9	Mllt10			Slc16a9							NEU1
Ctcf	Gpr56	Hspd1	Mmab			Slc38a5							NFE2L2
Ctsb	Gpr56	Hspe1	Mmp19			Slc39a3							NFIL3
Cx3cl1	Grasp	Hyou1	Mmp8			Snrpb							NFKBIA
Cxcl1	Grhl1	Icam1	Mmp9			Snrpd3							NFKBID
Cxcl10	Grhl1	Idh2	Mrpl30			Snx12							NINJ1
Cxcl12	Grm6	Ifi27l2a	Mrpl34			Snx18							NOP10
Cxcl13	Gtf2ird1	Ifrd1	Mrps7			Socs3							NOP56
Cxcl14	Havcr1	Il1_2	Mtf2			Specc1							NOP58
Cxcl2	Havcr1	Il2ra	Mx2			Spns2							NR1D2
Cxcl9	Hells	Il4i1	Nap1l1			Srf							NR4A1
Cxcr2	Hilpda	Ildr1	Napa			Srsf6							NR4A2
Cxcr4	Hist1h2bj	Ilf3	Ncr1			Sstr2							NR4A3
Cxcr5	Hist1h3c	Incenp	Ndufaf4			Stat3							NRARP
Cyba	Hmgb2	Ing3	Necap2			Stat5a							NRBF2
Cybb	Hmmr	Inpp4a	Nfatc2			Stk35							NUP98
Cyp19a1	Hpdl	Irf4	Nfkb2			Stx11							NUPL1
Cyp1a1	Hspa1a	Irg1	Nfkbib			Tagln2							NXT1
Cyp1a2	Hspa1b	Irs2	Nkg7			Tapbp							OAT
Cyp27b1	Ier3	Jak3	Nme1			Tcf20							OSBP
Cyp2e1	Ifih1	Junb	Noc3l			Tcof1							PCNA
Cyp3a13	Ikbke	Kcnk5	Nod2			Tgfb3							PER1
Dapk1	Il12rb1	Kcnn4	Nolc1			Tgm1							PHACTR1
Ddit3	Il2ra	Kdm2b	Nova1			Tjp2							PI4K2A
Dicer1	Il2ra	Kdm6b	Nr1d1			Tlr2							PIM1
Dlgap5	Ildr1	KIf10	Nras			Tmem109							PLK2
Dmp1	Inf2	Kif23	Nrxn3			Tmem266							PLK3
Dnmt1	Iqgap3	Klhl9	Nuf2			Tmem81							PMAIP1
Drd2	Jph1	Kmo	Nup107			Tmprss6							PNP
Dusp1	Jup	Kpnb1	Oas3			Tmsb4x							PPIL4
Dync1h1	Kank3	Lasp1	Oaz1			Tnf							PPM1D
E2f1	Kcnk10	Lck	Oaz2			Tnfaip2							PPP1R15A
E2f3	Kctd17	Ldha	Ormdl1			Tnfaip3							PPP1R15B
Ebi3	Kdelc2	ler2	Oxnad1			Tnfaip6							PRNP
Ebp	Kif11	Lipg	P4ha1			Tnfrsf21							PTGER4
Edn1	Kif14	Litaf	Pafah2			Tnfsf13b							PTP4A1
Egf	Kif15	Lmna	Pak4			Tor3a							RAB11FIP1
Egfr	Kif18b	Lmnb1	Palm			Traf1							RAB21
Egr1	Kif20a	Lsp1	Pan2			Tsr2							RAB33B
Ehmt1	Kif22	Ltv1	Pcyt2			Ttc39c							RAB8B
Ehmt2	Kif23	Ly86	Pde6d			Unc119							RANBP2
Eif2ak2	Kif2c	M6pr	Pex13			Urm1							RASGEF1B
Eif4e	Kif4	Maf	Pex2			Usp18							RBM38
Eif4h	Kif7	Maff	Phlda1			Usp41							REL
Elavl1	Kifc1	Maff	Pibf1			Vasp							RGS1
Elf3	Kifc3	Mafk	Pigv			Vav1							RGS16
Eln	Kifc3	Mafk	Pilra			Vps53							RGS2
Enpp2	Kntc1	Map2k1	Pilrb			Wdr46							RHEB
Ep300	Lad1	Mapk6	Pkm			Zbed1							RIT1
Epas1	Lig1	Mat2a	Plk1			Zmiz2							RND1
Epcam	Lipg	Maz	Plxnb1			Znf283							RNMT
Ephb2	Lrp5	Mcm5	Pmaip1			Znf507							RP11-203J24.8
Erap1	Lrr1	Mef2b	Pms1			Znf530							RP11-256P1.1
Esr1	Lrrc32	Melk	Pms2P1			Znf787							RP11-271K21.7
Evpl	Lrrc32	Mid1	Polb										RP11-290D2.4
F2	Maff	Mis18bp1	Pold4										RP11-504G3.1
F3	Maged1	Mki67	Polr1c										RP11-884K10.5
F8	Maoa	Mlx	Polr2a										RP5-1187M17.10
Faf1	Mastl	Mreg	Polr3e										RPRD1B
Fas	Mcm10	Mrpl18	Ppcs										RRP12
Faslg	Melk	Mrpl45	Ppfibp1										RYBP
Fbp1	Melk	Mrps5	Ppp1r15b										SAT1
Fcer2	Mfhas1	Ms4a4c	Ppp1r3b										SDCBP
Fcgr1	Mgll	Msh6	Ppp5C										SERPINB9
Fcgrt	Mgll	Mthfd1	Prdm1										SERTAD1
Fgf10	Mid1	Mthfd1l	Prdm11										SESN2
Fgf7	Mis18bp1	Mtmr4	Prdm8										SGK1
Fgf8	Mki67	Mvd	Prkab2										SH2B3
Fgfr1	Mlf1	Myc	Ptgs2										SIK1
Flt4	Mlkl	Naa50	Ptpn7										SLAMF7
Fmn2	Mnd1	Nab2	Ptx3										SLBP
Fn1	Mnda	Nampt	Qtrt2										SLC16A1
Fos	Mreg	Napsa	Rab29										SLC19A2
Fosb	Msi1	Nbn	Rabl2a										SLC20A1
Fosl1	Mtap2	Ncf1	Rabl2b										SLC25A33
Foxa2	Mxd3	Ncf4	Rac2										SLC2A3
Foxo3	Mybl2	Nckipsd	Rb1										SLC35A2
Foxp3	Myh10	Ndufa10	Rb1Cc1										SLC38A2
Fst	Myo1g	Nek2	Rbbp4										SNAI1
Ftmt	Myo1g	Nek7	Rfxank										SNIP1
G0s2	Nampt	Nfam1	Rgcc										SNORA51
Gabpb2	Ncapg	Nfe2l2	Rgl1										SNORD14D
Gadd45b	Ncapg2	Nfkb1	Rnd1										SNX9
Gadd45g	Ncaph	Nfkbia	Rnf4										SPAG4
Galk1	Necab3	Nfkbid	Rpl27a										SPATA2
Gast	Nefh	Nfkbie	Rpl39										SPTY2D1
Gata3	Neil3	Nfkbiz	Rpl39L										SQLE
Gc	Nek2	Nfya	Rps28										STK17A
Gca	Nkain1	Nme6	Rps8										STK17B
Gclc	Nkg7	Nop16	Rrp8										STX5
Gdf15	Nme4	Nop58	Rs1										SYAP1
Gdnf	Nr1d1	Nr4a1	S100a12										TAF13
Gfap	Nr4a2	Nr4a2	S100a3										TAGAP
Gfi1	Nr4a3	Nr4a3	S100a4										TBC1D15
Gkn2	Nt5dc2	Nrp1	S100a9										TIPARP
Glrx	Nucb2	Nsun2	S100z										TMEM2
Gphb5	Nuf2	Nudt9	Scarb1										TMEM88
Grin1	Nusap1	Nup62	Sdf2l1										TMF1
Grp	Oip5	Oasl1	Selenow										TNF
Gsk3a	Palm	Orai1	Selplg										TNFAIP3
Gsk3b	Pard3b	P4ha1	Sema7A										TNFSF9
Gstp1	Pask	Pbdc1	Serpinb2										TOB1
Gstp2	Pbk	Pcna	Serpine1										TOB2
Gtf2b	Pcx	Pdcd1lg2	Sirt2										TOPORS
H2-D1	Pdgfa	Pde6d	Slamf8										TP53INP2
H2-K1	Penk	Pdia3	Slc1a3										TUBA1A
H2-Q10	Phf15	Pfn1	Slc25a12										TUBB2A
H2-Q7	Phlda3	Phb2	Slc30a7										TUBB2C
H2-T23	Phlda3	Phgdh	Slc39A6										UBE2S
Hamp	Pim1	Pik3r6	Slc7A1										USP9X
Hax1	Pip5k1b	Pim1	Smpd1										UTP11L
Hbegf	Plekhg4	Pkm	Sox8										VPS26A
Hdac1	Plk1	Plaur	Spata2										XBP1
Hdac7	Plscr1	Pld4	Spef1										YPEL5
Hes1	Pon3	Plek	Sqstm1										ZBTB10
Hif1a	Ppap2a	Plekhg2	Srebf2										ZFAND5
Hmgn1	Ppp1r15a	Plekho2	Srf										ZFP36
Hmox1	Ppp1r3b	Plk3	Srsf2										ZNF10
Hnf4a	Prc1	Plxnc1	Ssr4p1										ZNF165
Hoxa9	Prdm16	Plxnd1	Sssca1										ZNF295
Hp	Prkar2b	Pml	Stag3l4										ZNF326
Hpse	Psrc1	Pnkp	Stard10										ZNF331
Hsd11b1	Psrc1	Pold1	Stat1										ZNF410
Hsd11b2	Ptpn3	Ppia	Stat5a										ZNF615
Hsd17b1	Qpct	Ppp1ca	Stat6										ZUFSP
Hsp90aa1	Racgap1	Ppp1r11	Stxbp3
Hspa1a	Rad51	Ppp1r15a	Sugct
Hspa5	Rad51ap1	Ppp1r16b	Svil
Hspb1	Rad54b	Ppp2r5d	Synpo
Hspd1	Rad54l	Prcp	Tagln2
Htr1a	Rap1gap2	Psma4	Tapbp
Htra1	Rarres1	Psma6	Tatdn2
Hyal1	Rbm24	Psma7	Tbc1d19
Icam1	Rbm47	Psmb8	Tfap2A
Ier3	Recql4	Psmb9	Tfdp3
Ifit3	Reep2	Psmd1	Tfe3
Ifna1	Rel	Psmd12	Timp1
Ifna11	Rel	Psme1	Tjp2
Ifna12	Rgs9bp	Psme2	Tln1
Ifna13	Rhobtb1	Psme3	Tm4Sf19
Ifna9	Rpp25	Psmg1	Tmem120a
Ifnb1	Rrm2	Ptbp1	Tmem141
Ifng	Ryk	Ptger4	Tmem258
Ifnl2	Selplg	Ptpn22	Tmem53
Ifnl3	Sgol1	Ptpn6	Tnf
Igf1	Sh3bp5	Ptprcap	Tnfrsf1A
Igf1r	Sh3rf1	Ptprs	Tnfsf13
Igf2bp2	Shank1	Pus1	Tnfsf13B
Igfbp5	Shcbp1	Rab20	Tnfsf14
Ikbkb	Siah2	Rab8b	Tnip3
Ikbke	Ska1	Rabgef1	Traf1
Il10	Slc15a3	Rac2	Traf3Ip3
Il12a	Slc15a3	Rad51c	Trappc3
Il12b	Slc16a3	Ranbp1	Trim27
Il15	Slc25a13	Rap1b	Trim31
Il17a	Slc2a1	Rasal1	Trpm2
Il17c	Slc39a8	Rasgef1b	Tsc22D2
Il18	Smyd2	Rb1	Tspan31
Il19	Snai1	Rbl1	Ttc17
Il1a	Snai1	Rcc2	Ube2h
Il1b	Sord	Rel	Ube2L6
Il1rn	Spag5	Rgs1	Usp2
Il2	Spc24	Rgs10	Usp25
Il20	Spc25	Rgs3	Vav1
Il21	Spon1	Rilpl2	Vsig4
Il23a	Spp1	Ripk2	Wbp4
Il27	Spry2	Rnf213	Yipf3
Il2ra	St8sia6	Rpl3	Yme1L1
Il2rb	Stac2	Rps2	Ywhab
Il33	Stil	Rps6ka1	Zbtb11
Il4	Stk39	Rpsa	Zcchc4
Il6	Stmn1	Rrad	Zdhhc6
Il7r	Syce2	Rtca	Zfhx2
Il9	Syna	Rxra	Znf217
Ilk	Sytl3	S100a10	Znf221
Ing4	Tanc1	S1pr3	Znf395
Irf1	Tcf19	Samsn1	Znf581
Irf4	Tex15	Sash1	Znf76
Irf7	Tfdp1	Scarb1	Znhit1
Irf8	Tiam1	Sde2
Irs1	Timd2	Selplg
Isg15	Timd2	Serbp1
Isg20	Tjp2	Serpinf1
Itch	Tm4sf19	Setd8
Itgax	Tmcc3	Sf3a3
Jag1	Tmem132a	Sfxn2
Jak1	Tmem98	Sgol1
Jun	Tnfaip8l1	Sh3kbp1
Junb	Tnfrsf19	Shank1
Kdm1a	Tnfrsf8	Shisa8
Kdm2a	Tnfrsf8	Shmt1
Kdr	Tnfsf14	Siah2
Keap1	Tnfsf9	SIc16a1
Kifbp	Top2a	Sic16a10
Kiss1	Tpi1	SIc17a5
Kitlg	Tpx2	SIc25a39
Klf2	Trim29	SIc39a10
Klk1	Trip13	SIc41a1
Klk1b1	Troap	Siglecg
Klk1b11	Tspan33	Sirpa
Klk1b16	Ttk	Slc25a4
Klk1b21	Tyms	Slfn2
Klk1b22	Tyms-ps	Smad3
Klk1b24	Ube2c	Smc2
Klk1b26	Uhrf1	Snrpa
Klk1b27	Unc13b	Snx3
Klk1b3	Xist	Spag9
Klk1b4	Xkr5	Spcs3
Klk1b5	Xylb	Srgn
Klk1b8	Zfp365	Srsf1
Klk1b9	Zik1	Srsf7
Kmt2a		St13
Kmt5c		St14
Krt14		St8sia6
Krt35		Stap1
Lcn2		Stat1
Lep		Stat5a
Lgals1		Stim2
Lipe		Suclg1
Lpl		Supt16
Lta		Swap70
Ltb		Tada1
Ltc4s		Tagap
Ltf		Tagln2
Ly96		Tapbp
Lyz1		Tardbp
Lyz2		Tatdn2
Maf		Tbc1d10c
Map3k14		Tcp1
Map3k8		Tgif1
Mapk1		Tgif2
Mapk14		Tial1
Mapk8		Timm13
Mapre1		Tle4
Mat2a		Tlr2
Mbtps1		Tmem154
Mbtps2		Tmem168
Mcat		Tmem229b
Mcl1		Tnfaip3
Mdm2		Tnfaip8
Me3		Tnfrsf13b
Med1		Tnfrsf1b
Met		Tob2
Mgmt		Tor3a
Mia		Tpst2
Mif		Trac
Mmp12		Traf1
Mmp13		Traf4
Mmp14		Trib2
Mmp1a		Trim30a
Mmp2		Trim8
Mmp3		Tuba1b
Mmp9		Tubb5
Mst1r		Twsg1
Mstn		Txnl4a
Mtdh		Txn1
Mtr		Tyk2
Myb		Ubtf
Myc		Uchl3
Myd88		Uqcc2
Myl2		Utp18
Mylk		Vav1
Myocd		Vegfa
Myod1		Vprbp
Myoz1		Wee1
Myoz2		Xrcc1
Naf1		Xxylt1
Nampt		Zbp1
Ncam1		Zbtb10
Ncor2		Zc3h12c
Neurod4		Zfp207
Nfatc1		Zfp217
Nfkb1		Zfp219
Nfkb2		Zfp36
Nfkbia		Zfp395
Nfkbid		Zfp710
Nfkbie		Zranb2
Nfkbiz		Cd40
Ngb		Rela
Ngf		Relb
Nod2		Nfkb2
Nolc1		Birc3
Nos1		Cd80
Nos2		Fcer2
Nos3		Tnfrsf9
Nox4		Ccl22
Nppa		Ikbke
Npy1r
Nqo1
Nr0b2
Nr1i2
Nr3c1
Nr4a1
Nr4a2
Nr4a3
Nrf1
Oga
Olfm4
Olr1
Oprd1
Oprm1
Optn
Osm
Ostm1
Oxtr
P2ry2
Padi1
Padi4
Parp1
Pck1
Pck2
Pcyt2
Pdcd4
Pdcd5
Pde7a
Pdgfa
Pdgfb
Pdk1
Pdk4
Pdlim7
Pgf
Pglyrp2
Pgr
Phex
Phf11
Phf11a
Pigr
Pin1
Plau
Plaur
Plin1
Plk1
Pmp22
Pou2f2
Ppara
Ppard
Pparg
Ppig
Ppp1r3a
Preb
Prf1
Prkcg
Prkd3
Prox1
Psip1
Psmb10
Psmb9
Ptafr
Pten
Ptgds
Ptger4
Ptges
Ptgfr
Ptgs1
Ptgs2
Pthlh
Ptpn13
Ptpn6
Ptx3
Rac3
Rack1
Rapsn
Rb1
Rbp4
Rc3h1
Rel
Rela
Relb
Ren1
Reps2
Rgs1
Rgs20
Rgs4
Ripk1
Ripk2
Rnh1
Rps3
Rps6ka4
Rrm2b
Ryk
S100a6
S1pr1
Saa1
Saa2
Samhd1
Sdc1
Sdc4
Sele
Selp
Serpina3c
Serpina3k
Serpina3m
Serpinb1a
Serpinb2
Serpine1
Sgk1
Sh3bgrl
Shh
Sin3a
Sirt1
Skp2
Slc1a2
Slc25a27
Slc4a4
Slc9a2
Smad7
Snai1
Snai2
Snd1
Socs3
Sod2
Sox9
Sp1
Sparc
Spn
Sqstm1
Src
St8sia1
Stat3
Stat4
Stat5a
Stc1
Stc2
Stk39
Sub1
Sult1e1
Tac1
Tafazzin
Tank
Tap1
Tap2
Tapbp
Tbp
Tbx21
Tcirg1
Tec
Tert
Tf
Tff1
Tff3
Tfpi2
Tgfb1
Tgm2
Thbd
Thoc1
Timp1
Tlr2
Tlr3
Tlr5
Tlr7
Tlr9
Tnc
Tnf
Tnfaip3
Tnfrsf10b
Tnfrsf11a
Tnfrsf11b
Tnfrsf13c
Tnfrsf18
Tnfrsf1a
Tnfrsf4
Tnfrsf9
Tnfsf10
Tnfsf11
Tnfsf13b
Tnfsf14
Tnfsf15
Tnfsf4
Tp53
Tp53bp1
Tp53bp2
Tp63
Tradd
Traf1
Traf2
Traf3
Traf5
Traf6
Trem1
Trib3
Trim21
Trim28
Trim63
Trpc1
Trpc6
Tslp
Tspoap1
Twist1
Uaca
Ube2b
Uchl1
Ucn
Upp1
Vcam1
Vegfa
Vegfd
Vim
Vwf
Wnt1
Wnt5a
Wt1
Xiap
Yy1
Zeb1
Zfp398

## Sheet: S3B
Suppl Table S3B GSEA of NFkB and CLL gene signatures in spleen and peritoneal cavity of young mice
positive NES = enriched in first genotype
SPL CD19Cre IKK2ca vs CD19Cre
pathway	pval	padj	log2err	ES	NES	size	leadingEdge
NFKB_CHIPCHIP_YOUNG_ALL	0.259813	0.288306	0.113787	-0.218763	-1.07916	198	Rac2;Lgals1;Sdf2l1;Gadd45b;Pkm;Sqstm1;Slc30a7;Necap2;Ctsc;Hsp90b1;Cfap20;Stat1;Mapk6;Rgcc;Man2b1;Rnf4;Mef2b;Ptpn7;Tmem141;Trim27;Ccr1;Nod2;Znhit1;Emp3;Tapbp;Pex2;Pms1;Selenow;Noc3l;Fen1;Tjp2;Atf6;Mrps7;Rb1;Prdm1;Gpx1;Stxbp3;Pibf1;Trappc3;Gypc;Flot1;Mdh1;Bag6;Jun;Arl1;Nolc1;Lipt1;Cyb5a;Fcf1;Nras;Mrpl34
NFKB_HEISE	0.0166706	0.0583472	0.352488	-0.301689	-1.42069	135	Tnfrsf19;Pon3;Hilpda;Rrm2;Bcl2a1d;Axl;Ncapg;Ebi3;Pbk;Plscr1;Slc15a3;Cdc45;Dhfr;Cenpp;Ccl22;Rad51;Clspn;Fam46c;Cdc6;Trip13;Dusp14;Cdca5;Asf1b;Ccnf;Dgat2;Tjp2;Bcl2a1b;Pard3b;Cdk1;Recql4;Mxd3;Ccne2;Dmxl2;E2f8;Cks1b;Bcl2l1;Cenpw;Tpx2;Syce2;Alpl;Melk;Gins2;Nusap1;Cdca3;Kif23;Ccnb1;Fam129c;Asns;Chst1;Tnfrsf8;Myo1g;Chst7;Psrc1;Plk1;Kif22;Racgap1;Sh3bp5;Ryk;Slc2a1;Siah2;Ccna2;Ckap2l
NFKB_UP_ALL_OCILY3_LY10	0.288306	0.288306	0.111918	0.27989	1.09854	50	Cd40;Relb;Sell;Nfkb2;Ccnd2;Tnfaip3;Pim1;Smarca2;Tnf;Marcks;Lta
NFKB_UP_BCR_PAPER	0.240426	0.288306	0.128143	-0.312765	-1.1686	41	Gadd45b;Lat2;Rassf4;Sirpa;Ebi3;Batf;Nde1;Specc1;Irf1;Ninj1
NFKB_UP_HBL1	0.0807692	0.141346	0.21925	-0.27007	-1.24863	121	Osm;Gadd45b;Lat2;Eloa;Rassf4;Sirpa;Ebi3;Srsf6;Batf;Psme1;Tlr2;Nde1;Specc1;Irf1;Hck;Rhebl1;Snrpb;Ninj1;Psmd11;Ccr7;Nfkb1;Mrps10;Tapbp;Rftn1;Rpl7l1;Dgat2;Tjp2;Mcm7;Lmo2;Slc39a3;Nr1d2;Kcnn4;Gramd1b
NFKB_ZHAO	0.00231601	0.0162121	0.431708	-0.266649	-1.41248	373	Lsp1;Hilpda;Rac2;Psmg1;Adk;Srgn;Cd83;Gadd45b;Alcam;Txn1;Axl;Fam3c;Psmb8;Sirpa;Pkm;S100a10;St13;Fcmr;Mrpl18;Ebi3;Kdm2b;Ctsc;Hsp90b1;Spcs3;Zfp710;Commd1;Emg1;Psmb9;Stat1;Glrx3;Tle4;Cd72;Swap70;Mapk6;Batf;Srsf7;Hspa5;Napsa;Nudt9;Mlx;Egr2;Pld4;Psme1;Tlr2;Psma7;Rab20;Ldha;Ing3;Pdia3;Inpp4a;Ezh2;Snx3;Actg1;Mef2b;Ahr;Ccl22;Ly86;Gem;Psma4;Grn;Aurkaip1;Bin2;Rrad;Ccr1;Eif4a1;Nfkb1;Wee1;Gpr65;Aldh9a1;Arid3a…
NFKB_collecTRI	0.0532418	0.124231	0.321776	-0.24396	-1.25623	287	Sub1;Lgals1;Bad;Egr1;Cd83;Osm;Gadd45b;Spn;Alcam;Parp1;Rnh1;Sdc1;H2-Q7;Chfr;Pin1;Sqstm1;Hsd11b1;H2-D1;Mif;Preb;Irf8;Fcgrt;Ebi3;Becn1;Cfap20;Apoe;Psmb9;Psmb10;Tradd;Ube2b;Ctsb;Hspa5;Padi4;Tgfb1;Mcl1;Tlr2;Irf1;B2m;Traf6;Ahr;Ccl22;H2-T23;Tnfrsf13c;Tap1;Clspn;Psip1;Tnfsf4;Glrx;Ccr7;Nfkb1;Serpinb1a;Pck2;Nod2;Hdac1;Tapbp;Mtdh;Ccl17;Ccne1;Nfkbid;Map3k14;Zeb1;Igf1r;Junb;Atf6;Gadd45g;Hyal1
HERISHANU	0.315175	0.315175	0.103958	-0.440242	-1.134	11	Cd83;Gadd45b;Ebi3
SPL CD19Cre IKK2ca/ca vs CD19Cre IKK2ca
pathway	pval	padj	log2err	ES	NES	size	leadingEdge
NFKB_CHIPCHIP_YOUNG_ALL	0.0246911	0.0491578	0.352488	-0.309372	-1.41456	195	Ccl5;Selplg;Tagln2;Lmna;Hsp90b1;Rgcc;Srebf2;Emp3;Capg;Nkg7;Svil;S100a4;Mrpl30;Selenow;Sdf2l1;Il6st;Itsn2;Atg101;Pak4;Polb;Cd55;P4ha1;Creb1;Jun;Tln1;Prkab2;Gng5;Prdm1;Mis18a;Ywhab;Smpd1
NFKB_HEISE	0.110251	0.154352	0.186433	-0.279327	-1.22303	132	Xist;Selplg;Ccnd2;Prkar2b;Racgap1;Hmgb2;Pon3;Nkg7;Chst7;Coro2a;Asns;Fgd2;Inf2;Ankrd37;Cit;Mki67;Atf3;Cenpf
NFKB_UP_ALL_OCILY3_LY10	0.502008	0.502008	0.0791317	-0.268038	-0.975461	48	Ccnd2;Rasgrp1;Irf4;Sell;Id2;Lyn;Litaf
NFKB_UP_BCR_PAPER	0.273267	0.318812	0.114267	0.32763	1.1324	37	Il4i1;Nfkbia;Cd40;Ebi3;Cd80;Dusp2;Nde1;Rftn1
NFKB_UP_HBL1	0.0280902	0.0491578	0.352488	0.314317	1.36405	122	Il4i1;Il12a;Ltb;Nfkbia;Cd40;Mrps10;Rhebl1;Ebi3;Bax;Snrpb;Plk3;Rps6kb2;Cd80;Zmiz2;Kynu;Pes1;Pa2g4;Wdr46;Osm;Scly;Dusp2;Rpl7l1;Vasp;Sema7a;Srsf6;Nde1;Rftn1;Samsn1;Cct3;Tsr2;Eif5a;Il10;Birc3;Csnk2a1;Tapbp;Slc39a3;Lpcat3;Snrpd3;Tnfaip3;Ptges3;Ifih1;Irf1;Psme1;Rps2;Tnf;Stx11
NFKB_ZHAO	8.92447e-05	0.000624713	0.538434	0.305311	1.54372	376	Il4i1;Mef2b;Adm;Cd72;Fcmr;Grap;Lck;Swap70;Bhlhe40;Cd83;Commd1;Rilpl2;Nfkbia;Fam3c;Rac2;Psme2;Egr3;Grn;Rasal1;Psma7;Ahr;Adk;Cd40;Ccl22;9130401M01Rik;Ebi3;St13;Fam43a;Nckipsd;Shisa8;Psmg1;Casp4;Serpinf1;Eif4a1;Cd81;Mrpl45;Psma4;Egr2;Mthfd1;Nfkbie;Clk1;Plk3;Ilf3;Hmgn3;Shmt1;Mlx;Cd80;Trib2;Gid4;Nfkbid;Tnfaip8;Ncf1;Siah2;Ncf4;Mrpl18;Arid3a;Hilpda;Kdm2b;Stap1;Timm13;Cd274;Fubp1;Srsf7;Gypc;Tagap;Tle4;Dn…
NFKB_collecTRI	0.00415848	0.0145547	0.407018	-0.312569	-1.49326	289	S100a6;Vim;Ccl5;Cd2;Lyz2;Ccnd2;Cd3e;Klf2;Alox5ap;S1pr1;Cd8a;Hmgn1;Pdcd4;Isg20;Ifit3;Il2rb;Irf4;Foxo3;Samhd1;Jak1;Dnmt1;Calm1;Hspa5;Casp8;Cxcr4;Dync1h1;Pck2;Irf7;Pou2f2;Sdc1;Tcirg1;Bcl2l11;Gstp1;Plaur;Gclc;H2-T23;Myc;Tnfrsf18;Creb1;Carm1;Jun;Cd28;Zfp398;Casp9;H2-Q7;Gsk3a;Ptger4;Mapk14;Bag1;Cxcr5;Ebp;Socs3;Akt1;Atf3;Kdm2a;Epcam;Fcgrt;H2-D1;Kmt5c;Eif4h;Ctsb;Ehmt2;Ceacam1
HERISHANU	0.269231	0.269231	0.116739	0.473915	1.17137	10	Cd83;Ebi3;Lta;Nfkbie;Dusp2
SPL CD19Cre IKK2ca/ca vs CD19Cre
pathway	pval	padj	log2err	ES	NES	size	leadingEdge
NFKB_CHIPCHIP_YOUNG_ALL	0.00120632	0.00422211	0.45506	-0.367202	-1.5891	195	Selplg;Tagln2;Emp3;Gadd45b;Lmna;Ccl5;Selenow;Rgcc;Hsp90b1;Jun;Lgals1;Mrpl30;Svil;Ctsc;Prdm1;Ccr1;Bcl6;Sqstm1;Capg;Srebf2;Sdf2l1;Mis18a;Tln1;Pak4;Stxbp3;Pkm;Traf1;Mrpl34;Prkab2;Atf6;Gng5;Necap2;Itsn2;Actr3;Nkg7;Smpd1;S100a4;Atg101;Mapk6;Stat1;Creb1;P4ha1;Cfap20;Rnf4;Il6st
NFKB_HEISE	0.0032512	0.00758613	0.431708	-0.379981	-1.57044	134	Xist;Selplg;Pon3;Axl;Spon1;Prkar2b;Racgap1;Chst7;Bcl2a1d;Tnfrsf19;Hmgb2;Rrm2;Asns;Coro2a;Timd2;Dusp14;Ccnd2;Bcl2l1;Ankrd37;Tnfsf9;Trip13;Nkg7;Bcl2a1b;Cdk1;Cenpn;Asf1b;Kif23;Dhfr
NFKB_UP_ALL_OCILY3_LY10	0.239344	0.239344	0.110565	-0.33074	-1.14802	50	Gadd45b;Id2;Rasgrp1;Ccr7;Litaf;Irf4;Ell2;Junb;Lyn;Ccnd2;Traf1;Bcl2l1;Ripor2;Batf;Nfkb1;Stat1;Cflar;Gpr183;Plek
NFKB_UP_BCR_PAPER	0.0959596	0.111953	0.231127	0.390164	1.36205	39	Il4i1;Cd40;Nfkbia;Tnfaip3;Tnf;Il10;Birc3;Nfkb2
NFKB_UP_HBL1	0.0408574	0.0715004	0.321776	0.303178	1.3406	124	Il4i1;Il12a;Cd40;Ltb;Nfkbia;Tnfaip3;Tnf;Kynu;Il10;Sema7a;Birc3;Nfkb2;Zmiz2;Rps2;Pes1;Wdr46;Rps6kb2;Plk3;Csnk2a1;Pa2g4;Bax;Mrps10;Scly;Rhebl1;Tor3a;Dusp2;Fus;Tcof1;Vasp;Nampt
NFKB_ZHAO	0.0623342	0.0872679	0.206588	-0.265543	-1.22919	378	S100a10;Selplg;Tagln2;Ptpn22;Lsp1;Ifi27l2a;Cnp;Slfn2;Gadd45b;Axl;Zfp36;Kcnn4;Lmna;Hspa5;Fas;Spcs3;Napsa;Hsp90b1;Pld4;Plaur;Ctsc;Litaf;Trac;Anp32a;Ccr1;Irf4;Capg;Tpst2;Coro2a;Gpr65;Psmb9;Rgs10;Ing3;Inpp4a;Eif2s3x;Ppp1r11;Dnaja1;Tnfrsf13b;Ppp1ca;Junb;Alcam;Pkm;Ccnd2;Traf1;Rab20;Gem;Snx3;Ldha;Pml;Bcl2l1;Zfp395;Atf4;Psmb8;Tuba1b;Ms4a4c;Nudt9;Pbdc1;Sf3a3;Dtx1;Plekho2;1810037I17Rik;Batf;Txn1;Eno1;Zfp21…
NFKB_collecTRI	0.000485332	0.00339733	0.498493	-0.340803	-1.53853	294	S100a6;Vim;Cd2;Klf2;Sdc1;Gadd45b;S1pr1;H2-Q7;Tbx21;Cxcr4;Irf8;Hspa5;Ccl5;H2-D1;Samhd1;Fas;Calm1;H2-T23;Pck2;Ctsb;Jun;Fcgrt;Cd3e;Hsd11b1;Ccr7;Il2rb;Lgals1;Rnh1;Plaur;Egr1;Irf4;Spn;Sqstm1;Hmgn1;Psmb9;Ebp;H2-K1;Mtdh;Junb;Alcam;Ccnd2;Cd8a;Traf1;Ceacam1;Bcl2l11;Parp1;Pdcd4;Casp8;Sub1;Bcl2l1;Atf6;Isg20;Gstp1;Casp9;Preb;Map3k14;Btk;H2-Q10;Nfkb1;Akt1;Creb1;Cfap20;Pten;Glrx;Ptger4;Cflar;Rc3h1;Casp3;Foxo3;…
HERISHANU	0.298701	0.298701	0.104344	-0.478076	-1.16166	11	Gadd45b;Id2;Junb;Ccnd2
PC CD19Cre IKK2ca vs CD19Cre
pathway	pval	padj	log2err	ES	NES	size	leadingEdge
NFKB_CHIPCHIP_YOUNG_ALL	0.158607	0.158607	0.153159	0.244756	1.16267	196	Dbi;Capg;Cd55;Rpl39;Nme1;Rps8;Tnf;Emp3;Cdkn1a;Nap1l1;Ndufaf4;Traf1;Fen1;Hsp90ab1;Atp5g1;Gpx1;Tmem258;Gtpbp4;Ercc1;Hcst;Nfkbib;Srebf2;Mis18a;Erap1;Hadha;Actr3;Cd69;Pcyt2;Rpl27a;Capza1;Fcf1;Cyb5a;Spata2;Gna15;Sugct;Sdf2l1;Oaz1;Mtf2;Qtrt2;Gins1;Fermt3;Gpr132;Extl2;Scarb1;Pde6d;Ppcs;Ilk
NFKB_HEISE	1.17306e-12	9.38448e-12	0.91012	0.582198	2.54467	109	Ccnd2;Uhrf1;Gins2;Cks1b;Rrm2;Lig1;Hells;Tyms;Dtl;Tcf19;Rap1gap2;Kif20a;Cdca8;Hmgb2;Asf1b;Ccna2;Birc5;Fignl1;Cdc45;Cenpm;Mki67;Ccnb2;Ube2c;Ildr1;Cenph;Cdk1;Dhfr;Nucb2;Mxd3;Nusap1;Cenpw;Smyd2;Spc24;Cdca3;Tpi1;Cdca5;Chaf1b;Kif11;Il2ra;Rad51;Ckap2l;Cdca2;Tfdp1;Clspn;Aurkb;Spc25;Cdc6;Ikbke;Hilpda;Kif22;Chaf1a
NFKB_ZHAO	1.32385e-06	5.29542e-06	0.643552	0.329299	1.68101	369	Nfkbia;Capg;Ccnd2;Mcm5;Ranbp1;Tuba1b;Grap;Eif2s3x;Banf1;Rps2;Pfn1;Relb;Cd86;Uchl3;Txn1;Tnfaip3;S100a10;Pcna;Eif5a;Cd81;Cd80;Birc5;Fignl1;Arhgap11a;Psma7;Pdcd1lg2;Serbp1;Hspe1;Ptpn6;Cd40;Mki67;Nup62;Snrpa;Traf1;Tubb5;Ildr1;Psme2;Fen1;Hsp90ab1;Tcp1;Srsf7;Eif4a1;Apex1;Hhex;Hmgn3;Rpsa;Farsb;Timm13;Ppia;Nfam1;Ccdc124;Mrpl45;Cct8;Ms4a4c;Pus1;Uqcc2;Ezh2;Ncf4;Commd1;Il2ra;Rilpl2;Pnkp;Rtca;M6pr;St14;Canx;…
NFKB_UP_ALL_OCILY3_LY10	0.00291236	0.00465977	0.431708	0.44518	1.66405	48	Nfkbia;Sell;Lta;Ccnd2;Relb;Tnf;Tnfaip3;Il10;Cd44;Cd40;Traf1
NFKB_UP_BCR_PAPER	0.0836653	0.0956175	0.21925	0.367437	1.3186	41	Nfkbia;Batf3;Tnf;Tnfaip3;Il10;Cd80;Cd40;Traf1
NFKB_UP_HBL1	0.00189482	0.00378965	0.45506	0.354976	1.59477	126	Nfkbia;Ccnd2;Tmsb4x;Rps2;Batf3;Tnf;Prmt1;Tnfaip3;Il10;Eif5a;Cd80;Ifi35;Snrpd3;Bbc3;Cd44;Cd40;Traf1;Ltb;Pnp;Pa2g4;Unc119;Lpcat3;Kynu;Cct3;Btbd19
NFKB_collecTRI	0.00170456	0.00378965	0.45506	-0.282801	-1.43576	283	Gadd45g;Cd3g;Pou2f2;Ccr7;Gadd45b;Ciita;Socs3;Irf8;Sqstm1;Klf2;Fcgrt;Fos;Epcam;Mcl1;Glrx;Rnh1;Cd74;Jun;Map3k14;Nfatc1;Nfkb1;Cxcr4;Irf4;Pck2;Zfp398;Icam1;Neurod4;Hif1a;Bcl3;Myd88;Ctsb;Rela;Bcl2;Csf1;Atf6;Gclc;Foxo3;Psip1;Btg2;Dync1h1;Mgmt;S1pr1;Traf5;Igf1r;Samhd1;Tcirg1;Ctcf;Mcat;Akt1;Ccl5;Ryk;Gstp1;Cxcr5;Btk;Nod2;H2-T23;Apoe;Ehmt2;Il12a;Mapk8;Preb;Tgfb1;Ep300;Crebbp;Oga;Nrf1;Pigr;Ptger4;Pten;Parp1…
HERISHANU	0.166983	0.166983	0.147331	0.502309	1.2947	11	Lta;Ccnd2;Tnf
PC CD19Cre IKK2ca/ca vs CD19Cre IKK2ca
pathway	pval	padj	log2err	ES	NES	size	leadingEdge
NFKB_CHIPCHIP_YOUNG_ALL	0.106509	0.106509	0.191892	0.264302	1.20945	196	Stat1;Pmaip1;S100a4;Emp3;Tnf;Tapbp;Gypc;Traf1;Rac2;Dbi;Lage3;Actr3;Tfe3;Nfkbib;Hcst;Tln1;Wbp4;Smpd1;Cdkn1a;Fcf1;Ilk;Phlda1;Bag6;Nfkb2;Nme1;Sdf2l1;Stat6;Mmab;Ccrl2;Mef2b;Gpx1;Mrps7;Pde6d;Capg;Cd69;Cd55;Nolc1;Trappc3;Oas3;Lrsam1;Tjp2;Oaz1;Ormdl1;Ifngr1;Dguok;Arhgef2;Dpp3;Stxbp3;Tmem258;Sqstm1;Elp2;Rps28;Znhit1;Ivns1abp;Pold4;Rfxank;Ywhab;Ccl5;Prdm11;Napa;Ptpn7;Rbbp4
NFKB_HEISE	0.0849558	0.0970923	0.204295	0.289594	1.25702	131	Sh3bp5;Siah2;Ube2c;Syce2;Top2a;Ccnb1;Kif22;Cenpw;Spc25;Mlkl;Cks1b;Birc5;Melk;Adm;Kif18b;Ccna2;Cdca3;Nampt;Ccnb2;Prc1;Ebi3;Slc15a3;Aurkb;Dmxl2;Ska1;Tnfrsf8;Psrc1;Spc24;Cenpn;Il12rb1;Rel;Ccnf;Rrm2;Cdca5;Tjp2;Cdk1;St8sia6;Cdca7l;Rbm47;Rad51;Bcl2a1b;Nusap1;Kif23;Ckap2l;Ppp1r15a;Cdca8
NFKB_ZHAO	2.35208e-12	1.88167e-11	0.898671	0.420698	2.06595	362	Il4i1;Ms4a4c;Nfkbia;Cd83;Psme2;Grap;Pfn1;Psmb8;Swap70;Bhlhe40;Cd40;Stat1;Rilpl2;Psmb9;Dnmt3a;Fam43a;Ptpn6;Junb;Siah2;Fos;Hmgn3;Tapbp;Gypc;Zbp1;Tnfaip3;Traf1;Cd81;Ccdc50;Rac2;9130401M01Rik;Tor3a;Relb;Tnfaip8;H2-Eb2;Rabgef1;Nfkbid;Lasp1;Birc5;Ccdc124;Litaf;Melk;Commd1;Atp5l;Uqcc2;Adk;Jak3;Adm;Cd86;Kcnn4;Pdia3;Aurkaip1;G3bp1;Ppp1ca;Rrad;Psma4;Nampt;Nfkbie;Glrx3;Nfkb2;Ebi3;Ptprcap;S1pr3;Psma6;Plekho2…
NFKB_HERISHANU	0.00031279	0.000375348	0.498493	0.808507	1.9634	10	Cd83;Lta;Junb;Tnf;Nfkbie;Ebi3
NFKB_UP_ALL_OCILY3_LY10	2.99437e-08	8.98312e-08	0.719513	0.648017	2.38549	49	Nfkbia;Cd83;Lta;Cd40;Stat1;Gpr183;Zfp36l1;Junb;Tnf;Tnfaip3;Traf1;Relb;Irf1;Litaf;Nampt;Nfkbie;Nfkb2;Ebi3
NFKB_UP_BCR_PAPER	2.08006e-06	3.12008e-06	0.627257	0.65127	2.27388	39	Il4i1;Nfkbia;Batf3;Cd40;Tnf;Tnfaip3;Traf1;Irf1;Lat2;Usp18;Kcnn4;Nfkb2;Ebi3;Sirpa;Specc1
NFKB_UP_HBL1	3.36672e-07	6.73344e-07	0.674963	0.481716	2.08106	122	Il4i1;Ltb;Nfkbia;Il12a;Batf3;Cd40;Tnf;Tapbp;Tnfaip3;Traf1;Vasp;Tor3a;Irf1;Lat2;Stx11;Usp18;Kcnn4;Srsf6;Nampt;Cd22;Slc39a3;Nfkb2;Ebi3;Tmsb4x;Mrps10;Sirpa;Mvk;Specc1;Kynu
NFKB_collecTRI	5.67543e-09	3.40526e-08	0.761461	0.415527	1.97995	277	Ltb;Nfkbia;Mgmt;Il12a;Cd83;H2-Q7;B2m;Lta;Cyba;Bhlhe40;Tap1;Cd40;H2-K1;H2-D1;Psmb9;Pigr;Ptpn6;Tnfrsf13c;Psmb10;Junb;Tnf;Fos;Tapbp;Stc1;Tnfaip3;Traf1;Tank;Tap2;H2-T23;Gadd45g;Ccnb1;Relb;Irf1;Nfkbid;Cd3g;Pdk1;Birc5;Spn;Cd86;Chfr;Tcirg1;Cd74;Mif;H2-Q10;Cdkn1a;Traf2;Nampt;Nfkbie;Ilk;Nfkb2;Pin1;Ebi3;Rnh1;Egr1;Hsd11b1;Hif1a;Ebp;Hax1;Irf8;Csf1;Akip1;Alox5ap;Mtdh;Rel;Cd69;Nolc1;Tgfb1;Stat3;Parp1;Pdcd5;Mat…
PC CD19Cre IKK2ca/ca vs CD19Cre
pathway	pval	padj	log2err	ES	NES	size	leadingEdge
NFKB_CHIPCHIP_YOUNG_ALL	0.0168002	0.0168002	0.352488	0.30907	1.37032	195	Dbi;Tnf;Capg;Traf1;Emp3;Nme1;Cd55;Cdkn1a;Actr3;Nfkbib;Gpx1;Stat1;Hcst;Lage3;Fcf1;Gypc;S100a4;Tfe3;Ilk;Sdf2l1;Tmem258;Pmaip1;Rac2;Pde6d;Tapbp;Nap1l1;Oaz1;Nfkb2;Nolc1;Fen1;Oas3;Atp5g1;Ndufaf4;Cyb5a;Ywhab;Trappc3;Cd69;Ifngr1;Tln1;Mmab;Rbbp4
NFKB_HEISE	8.64496e-08	3.45799e-07	0.704976	0.532973	2.17004	108	Cks1b;Birc5;Cenpw;Ube2c;Ccna2;Rrm2;Top2a;Kif22;Uhrf1;Ccnb2;Spc25;Psrc1;Siah2;Tcf19;Ccnb1;Hmgb2;Asf1b;Cdca8;Cdca3;Spc24;Cdk1;Tyms;Sh3bp5;Ebi3;Aurkb;Lig1;Cdca5;Melk;Nusap1;Rap1gap2;Adm;Syce2;Ckap2l;Cenpm;Rad51;Kif11;Mki67;Prc1;Ikbke;Mxd3;Ccnd2;Bcl2a1b;Nampt;Hilpda;Ccnf;Fignl1;Cdc45;Cdca2;Chaf1b;Tjp2;Il2ra;Tpx2;Tfdp1;Dmxl2
NFKB_ZHAO	4.58979e-15	3.67183e-14	0.996986	0.462923	2.19837	367	Nfkbia;Ms4a4c;Il4i1;Pfn1;Grap;Psme2;Rilpl2;Psmb8;Ptpn6;Cd40;Relb;Capg;Fam43a;Tnfaip3;Traf1;Cd83;Cd81;Banf1;Cd86;Hmgn3;Ranbp1;Birc5;Bhlhe40;Uqcc2;Swap70;Eif5a;Zbp1;Psmb9;Ccdc124;Tnfaip8;Stat1;Mcm5;Commd1;Txn1;Timm13;Dnmt3a;Siah2;G3bp1;Nfkbie;Ppp1ca;Pdcd1lg2;Psma6;Gypc;Hhex;Tor3a;Psma7;Psme1;Ebi3;9130401M01Rik;Melk;Phb2;Ncf4;St14;Rac2;Uchl3;Pde6d;Tapbp;Arhgap11a;Tuba1b;S1pr3;Atp5l;Adm;Psma4;Psmd1;M…
NFKB_HERISHANU	0.00145281	0.00174337	0.45506	0.74535	1.85312	11	Lta;Tnf;Cd83;Nfkbie;Ebi3;Ccnd2
NFKB_UP_ALL_OCILY3_LY10	1.07288e-05	3.21864e-05	0.593325	0.597111	2.10138	48	Nfkbia;Lta;Cd40;Relb;Tnf;Tnfaip3;Traf1;Cd83;Sell;Stat1;Gpr183;Nfkbie;Il10;Zfp36l1;Ebi3;Nfkb2;Cd44;Ccnd2
NFKB_UP_BCR_PAPER	0.00097515	0.00146273	0.477271	0.542742	1.84758	40	Nfkbia;Il4i1;Batf3;Cd40;Tnf;Tnfaip3;Traf1;Il10;Ebi3;Nfkb2;Specc1;Usp18;Irf1;Kcnn4;Myo7a;Birc3
NFKB_UP_HBL1	1.4355e-06	8.61298e-06	0.643552	0.479217	1.9826	124	Nfkbia;Il4i1;Batf3;Cd40;Tnf;Tnfaip3;Traf1;Ltb;Tmsb4x;Eif5a;Vasp;Kynu;Il10;Tor3a;Psme1;Ebi3;Ifi35;Il12a;Mrps10;Tapbp;Mvk;Bbc3;Snrpb;Nfkb2;Cd44;Bax;Cct3;Ccnd2;Snrpd3;Zmiz2;Specc1;Srsf6;Usp18;Prmt1;Irf1;Nampt;Scly;Snx12;Kcnn4;Mrto4;Lpcat3;Myo7a;Birc3;Unc119;Tjp2;Rps6kb2;Pa2g4;Lat2;Slc39a3
NFKB_collecTRI	9.36456e-05	0.000187291	0.538434	0.351776	1.63904	279	Nfkbia;B2m;Lta;Cyba;H2-Q7;Mgmt;Ptpn6;Cd40;Relb;Tnf;Psmb10;Tnfaip3;Traf1;Tank;Ltb;Cd83;Tap1;Cd86;H2-K1;Birc5;Bhlhe40;Stc1;Cdkn1a;Mif;Psmb9;H2-D1;Ccnb1;Nfkbie;Sub1;Il10;Ilk;Ebi3;Pdk1;Map3k8;Rack1;Pin1;Akip1;Il12a;Tapbp;Phf11a;Nfkb2;Tnfrsf13c;Cd44;Bax;Traf2;Pigr;Sh3bgrl;Nolc1;Tap2;Ikbke;Nfkbid;Ccnd2
HERISHANU_E2F	0.00107602	0.00134503	0.45506	0.796064	1.9637	10	IL4I1;MCM4;MCM6;CDCA7;EZH2;PCNA
HERISHANU_LN_general	4.1282e-05	0.000103205	0.557332	0.646053	2.11747	32	CD83;BIRC5;CCNA2;TOP2A;CCNB2;CCNB1;MCM4;MCM6;TYMS;AURKB;CR2;TK1;MKI67;CCND2;EGR3;CD69;AURKA;CDCA2
CLL-PD_MYCTARGETS	0.000156076	0.000260126	0.518848	0.485683	1.87996	73	NME1;CCNA2;COX5A;G3BP1;PSMB2;DUT;MCM4;PHB;PSMA7;NHP2;CCT4;CCT7;EPRS;PSMA4;CANX;LDHA;CCT3;DEK;APEX1;SNRPD3;PSMC4;EXOSC7;VDAC3;PPIA;CDC45;COPS5;HDDC2;TFDP1;PA2G4;SSBP1;NCBP2;EIF2S1;SERBP1;SYNCRIP;MRPS18B;ABCE1
CLL-PD_OXPHOS	2.36019e-10	1.1801e-09	0.814036	0.641758	2.47172	71	ATP5J;COX5A;MRPL35;NDUFB6;NDUFA4;TIMM13;GLUD1;NDUFA8;COX6B1;UQCRB;ATP5J2;ATP5G3;IDH3A;NDUFB3;ECI1;COX7A2;NDUFA5;LDHA;MRPS15;SDHD;ECH1;ATP5G1;MDH2;ATP6V0E1;ECHS1;FH;VDAC3;NDUFB4;ETFA;ATP5B;MTX2;NDUFB5
CLL-PD_mTORC1	0.00153082	0.00153082	0.45506	0.455617	1.76157	72	PRDX1;BHLHE40;ACTR3;RRM2;MCM4;MTHFD2;PDK1;DHCR24;SQLE;EPRS;PPA1;PSMA4;CANX;LDHA;HMGCS1;ATP5G1;PSMC4;QDPR;PPIA;AURKA;NAMPT;CCNG1;COPS5;SEC11A;PSMB5;HMGCR;TMEM97;ACLY;PSMG1;CACYBP;CCT6A;ENO1;IMMT;SSR1;HMBS;NMT1;PSPH;CYB5B;RPN1;PNP;PITPNB

## Sheet: S3C
Suppl Table S3C GSEA of NFkB gene signatures in lymphomas
positive NES = enriched in first genotype
IKK2caca TCL1 vs TCL1
pathway	pval	padj	log2err	ES	NES	size	leadingEdge
NFKB_CHIPCHIP_YOUNG_ALL	0.338776	0.338776	0.0793435	-0.2318	-1.05275	214	Srebf2;Lgals1;Necap2;Stxbp3;Selplg;Ube2h;Emp3;Tagln2;Slc30a7;Flot1;Arf3;Cdkn1a;Tln1;Tmem141;Yipf3;Man2b1;Atf6;Nras;S100a4;Golph3l;Ccdc88a;Ccr1;Ppp1r15b;Rgl1;Spata2;Mrpl30;Prkab2;Cat;Svil;Il6st;Rps28;Ctsc;Polr1c;Mtf2;Ddx31;Vav1;Scarb1;Pak4;Prdm1;Nup107;Oaz1;Rab29;Zcchc4;Gadd45b;Sirt2;Hspa1b;Bag6;Rgcc;Tatdn2;Stard10;Selenow;Limk1;Rb1
NFKB_HEISE	1.33035e-07	4.65621e-07	0.690132	0.376615	1.87676	216	Ikbke;Rel;Grm6;Mis18bp1;Mlf1;Nucb2;Cdca5;Cenpf;Sh3rf1;Dmxl2;Brip1;Eme1;Mxd3;Tyms;Cenpn;Fignl1;Pard3b;Rad51;Nusap1;Prdm16;Lipg;Kif20a;Cdca7l;Slc25a13;Oip5;Kif2c;Kif23;Spc25;Melk;Tjp2;Rad54b;Ncaph;Lig1;Tcf19;Stil;Spc24;Shcbp1;Chaf1b;Neil3;Bard1;Gins2;Adm;Cdc45;Top2a;Nampt;Kif18b;Brca1;Cst6;Esco2;E2f1;Ppp1r15a;Cdca2;Pim1;Kif4;Kif22;Chst1;F9;Lrr1;Hmgb2;Pcx;Kif11;Spag5;Tnfaip8l1;Ckap2;Bub1;Rap1gap2;Si…
NFKB_UP_ALL_OCILY3_LY10	4.60488e-06	1.07447e-05	0.610527	0.549442	2.19888	53	Cd40;Lta;Relb;Stat1;Tnf;Sell;Nfkbia;Tnfaip3;Zfp36l1;Nfkbie;Cd83;Nfkb2;Birc3;Cxcl10;Ccr7;Cntrl;Dusp2;Il10;Nampt;Traf1;Pim1;Batf;Fkbp15;Smarca2
NFKB_UP_BCR_PAPER	0.166667	0.194444	0.169571	0.3199	1.21881	44	Cd40;Il4i1;Tnf;Nfkbia;Tnfaip3;Nfkb2;Birc3
NFKB_UP_HBL1	0.0369539	0.0517355	0.321776	0.27051	1.27535	137	Cd40;Il4i1;Ltb;Tnf;Nfkbia;Tnfaip3;Kynu;Nfkb2;Birc3;Epsti1;Ifi35;Psme1;Dennd4a;Zmiz2;Ccr7;Vps53;Cct3;Dusp2;Plk3;Tjp2;Samsn1;Ptges3;Tsr2;Il10;Il12a;Vasp;Nampt;Traf1;Psmd11;Btbd19;Tmsb4x;Sgk1;Batf;Eif5a
NFKB_ZHAO	1.17445e-09	8.22112e-09	0.788187	0.340708	1.83441	400	Cd40;Ikbke;Grap;Relb;Lck;Il4i1;G3bp1;Mef2b;Egr2;Stat1;Rel;Nfkbia;Tnfaip3;Nfkbie;Uchl3;Mis18bp1;Fam167a;Rilpl2;Bhlhe40;Cd83;Pfn1;Mrpl45;Sash1;Trim30a;Ptprcap;Psme2;Nfkb2;Ing3;Ifrd1;Rela;Cbx1;Hmgn3;Sh3kbp1;Birc3;Tgif1;Psmb9;Psme1;Ccnl1;Fignl1;Apex1;Kdm6b;Traf4;Clk1;H2-Eb2;Sde2;Tgif2;Jak3;Aurkaip1;Grhpr;Ripk2;Mapk6;Ilf3;Psmg1;Banf1;Casp4;Swap70;Lipg;9130401M01Rik;Mthfd1;Pde6d;Mtmr4;Ptpn6;Kif23;Hspa8…
NFKB_collecTRI	0.0222974	0.0390204	0.352488	0.233574	1.23068	327	Tank;Cd40;Ikbke;Lta;Relb;Ltb;Pigr;Psmb10;Stat4;Tnf;Rel;Cybb;Nfkbia;Cyba;Optn;Tnfaip3;Nfatc1;Nfkbie;Bhlhe40;Cd83;Il15;Sdc4;Nfkb2;Rela;Pglyrp2;Birc3;Traf2;Smad7;Psmb9;Ccl5;Pdcd4;Dlgap5;B2m;Ripk2;Blk;Cxcl10;Akip1;Csf1;Mapk8;Ccr7;Ptpn6;Appl1;Cd69;Pin1;Il10;Map3k8;Il12a;Irf7;Cd3g;Mif;Nampt
IKK2ca TCL1 vs TCL1
pathway	pval	padj	log2err	ES	NES	size	leadingEdge
NFKB_CHIPCHIP_YOUNG_ALL	0.32562	0.37989	0.0922597	-0.219359	-1.04974	218	Flot1;Hspa1b;Necap2;Lgals1;Vav1;S100a4;Srebf2;Tln1;Polr1c;Rb1;Bag6;Man2b1;Yipf3;Spata2;Scarb1;Gpx1;Nras;Mdh1;Oaz2;Gadd45b;Atf6;Tatdn2;Slc30a7;Mrpl30;Arhgef2;Rgl1;Arf3;Isoc1;Mepce;Tmem141;Ube2h;Selplg;Stard10;Stxbp3;Zcchc4;Bcl6;Mtf2;Rgcc;Prkab2;Napa;Gnl1;Nkg7;Srf;Jun;Mccc2;Capza1;Golph3l;Cst7
NFKB_HEISE	0.950083	0.950083	0.0395979	-0.166434	-0.794129	216	Kcnk10;Jup;Hspa1b;Rhobtb1;Fgd2;Prkar2b;Coro2a;Il2ra;Tmcc3;Tnfrsf8;Inf2;Stac2;Bcl2a1d;Tnfrsf19;Ankrd37;Chst7;Hspa1a;Ebi3;Slc15a3;Bag2;Timd2
NFKB_UP_ALL_OCILY3_LY10	8.53815e-05	0.000298835	0.538434	0.498744	1.94437	53	Relb;Cd40;Lta;Tnf;Birc3;Stat1;Nfkb2;Sell;Nfkbia;Nfkbie;Tnfaip3;Marcks;Ncl;Traf1;Nampt;Ccnd2;Batf;Irf1;Cxcl10;Icam1
NFKB_UP_BCR_PAPER	0.0336445	0.0588779	0.321776	0.403811	1.53102	45	Cd40;Tnf;Birc3;Nfkb2;Elf3;Il4i1;Nfkbia;Tnfaip3;Usp18;Mreg;Traf1;Ctu1;Batf;Irf1;Icam1;Cd80;Stat5a
NFKB_UP_HBL1	0.000580376	0.00135421	0.477271	0.351643	1.64589	136	Cd40;Ltb;Il12a;Tnf;Birc3;Bax;Nfkb2;Il4i1;Tjp2;Nfkbia;Ifi35;Kynu;Ptges3;Vasp;Cct3;Tnfaip3;Nob1;Snrpd3;Psme1;Prmt1;Epsti1;Marcks;Btbd19;Tcof1;Usp18;Mreg;Pa2g4;Traf1;Ptges2;Nampt;Snx12;Stat3;Ccnd2;Zmiz2;Batf;Irf1
NFKB_ZHAO	2.88527e-06	2.01969e-05	0.627257	0.308677	1.63048	401	Relb;Cd40;Ikbke;Fam167a;Grap;Birc3;G3bp1;Stat1;Lck;Ptpn6;Nfkb2;Aatf;Il4i1;Nfkbia;Psme2;Ltv1;Uchl3;Mrpl45;Mef2b;Nbn;Nfkbie;Farsb;Pus1;Map2k1;Fubp1;Fchsd2;Pdcd1lg2;Shmt1;9130401M01Rik;St14;Tnfaip3;Plxnc1;Hmgn3;Psme1;Gm13835;1810037I17Rik;Traf4;Ripk2;Swap70;Phb2;Nup62;H2-Eb2;P4ha1;Utp18;Tardbp;St8sia6;M6pr;Atp5d;Fabp5;Emg1;Nop58;Casp4;Banf1;Fignl1;Kdm2b;Rilpl2;Mthfd1;Mreg;Traf1;Apex1;Tmem168;Nampt;C…
NFKB_collecTRI	0.120968	0.169355	0.160801	-0.233195	-1.16698	331	Sparc;Hpse;Parp1;Fcgrt;Padi4;Tcirg1;Mapk14;Ctsb;Hdac7;Yy1;Bcl2l11;Mcl1;Lgals1;Hes1;Psip1;Ltf;Abca1;Mtdh;Nfkb1;Btg2;Lyz2;Il2ra;Rb1;Glrx;Map3k14;Hspb1;Rc3h1;Tlr7;Alcam;H2-T23;Pten;Mdm2;Mapk1;S1pr1;Pck2;Gadd45b;Atf6;Irf8;Hspa1a;Tbp;Ebi3;Ehmt2;Ripk1;Adora2a;Sgk1;Oga;Clpp;Samhd1;Ostm1;Cd44;Cd28;Pde7a;Tbx21;Crebbp;Ceacam1;Tnfrsf13c;Gsk3b;Ep300;Mbtps2;Alox5ap;Ccl22;Akt1;Myb;Gsk3a;Ube2b;Ehmt1;Egr1;Eif4h;…
IKK2caca TCL1 vs IKK2ca TCL1
pathway	pval	padj	log2err	ES	NES	size	leadingEdge
NFKB_CHIPCHIP_YOUNG_ALL	0.581649	0.636204	0.0590955	-0.197001	-0.949962	216	Stxbp3;Cdkn1a;Nup107;Dbi;Polr3e;Ddx31;Sirt2;Elf3;Ccr1;Srebf2;Ndufaf4;Tagln2;Extl2;Rps28;Lgals1;Tspan31;Ddx21;Emp3;Ppp1r15b;Atp5g1;Ctsc;Fcf1;Golph3l;Ptpn7;Ccdc88a;Stat6;Pak4;Ifngr1;Selplg;Cd37;Slc30a7;Tmem141;Ube2h;Svil;Rps8;Nap1l1;Arf3;Selenow;Ilk;Oaz1;Oas3;Pcyt2;Limk1;Ormdl1;Ppcs;Arl1;Oxnad1
NFKB_HEISE	2.03118e-11	1.42182e-10	0.863415	0.428063	2.20751	214	Rel;Hspa1a;Chst1;Cst6;Hspa1b;Pim1;Mis18bp1;Nucb2;Grm6;Cenpn;Hmmr;Mlf1;Slc25a13;Ppp1r15a;Recql4;F9;Mxd3;Cdca5;Kif15;Brip1;Brca1;Dhrs3;Stil;E2f1;Birc5;Asf1b;Rad51;Sord;Shcbp1;Cenpf;Maged1;Siah2;Cdca2;Ikbke;Nkg7;Kif23;Ccnb2;Chaf1b;Ebi3;Spc24;Cdca8;Pard3b;Fam83d;Gins2;Eme1;Nek2;Nusap1;Uhrf1;Bub1;Kif2c;Cenpp;Bard1;Hmgb2;Tcf19;Atf3;Ncaph;Ppp1r3b;Ryk;Sh3bp5;Cdc45;Kif14;Tyms;Spag5;Arl5b;Baiap2;Neil3;Plsc…
NFKB_UP_ALL_OCILY3_LY10	0.00159015	0.00371035	0.45506	0.437347	1.75491	52	Cd83;Zfp36l1;Dusp2;Pim1;Sell;Tnfaip3;Il10;Cntrl;Nfkbia;Junb;Ccr7;Cd40;Fkbp15;Nfkb1;Ebi3
NFKB_UP_BCR_PAPER	0.636204	0.636204	0.0606404	-0.243709	-0.893318	45	Lmo2;Kcnn4;Batf3;Elf3;Myo7a;Rassf4
NFKB_UP_HBL1	0.554849	0.636204	0.0623861	-0.211246	-0.960076	136	Lmo2;Cd22;Kcnn4;Rhebl1;Sema7a;Marcks;Bax;Batf3;Pa2g4;Myo7a;Prmt1;Lpcat3;Rassf4;Tlr2;Tagln2;Tmem109;Nob1;Tcf20
NFKB_ZHAO	1.04285e-06	3.64998e-06	0.643552	0.303483	1.67425	398	Grap;Bcl11a;Tgif1;Rel;Egr2;Pfn1;Ptprcap;Tmem154;Cd83;Sh3kbp1;Dusp2;Pim1;Mis18bp1;Aurkaip1;Clk1;Ccnl1;Nfkbid;G3bp1;Mtmr4;Bhlhe40;Zbtb10;Nfkbiz;Jak3;Tnfaip3;Gem;Ndufa10;Ing3;Pde6d;Ppp1r15a;Fyn;Trim30a;Rilpl2;Psmg1;Sde2;Mapk6;Cd69;Ifrd1;Tgif2;Ifi27l2a;Nfkbia;Dhrs3;Dusp10;Junb;Mef2b;Uchl3;Kmo;Birc5;Ppp1ca;Plk3;Lck;Cbx1;Traf4;Cd40;Tob2;Hmgn3;Kdm6b;Siah2;Nr4a1;Rnf213;Ppp2r5d;Grhpr;Rela;Evl;Ikbke;Pdia3;…
NFKB_collecTRI	0.0161576	0.0282757	0.352488	0.23579	1.28397	323	Sgk1;Rel;Hspa1a;Map3k8;Cd83;Nfkbid;Mapk8;Bhlhe40;Nfkbiz;Tnfaip3;Appl1;Tcirg1;Gadd45g;H2-Q10;Il10;Tradd;Becn1;Cd69;Hpse;Blk;Il18;Nfkbia;Nfatc1;Tap1;Junb;Ctcf;Gtf2b;Jun;Rc3h1;E2f1;Cd74;Traf6;Cd3g;Calm2;Birc5;Ctsb;Hsp90aa1;Ccr7;Btg2;Cd40;Akt2;Cxcr4;Ube2b;Nr4a1;Stat4;Rela;Ikbke;Hmgn1;Gca;Nfkb1;Ehmt2;Ccl5;Myb;Ebi3;Dlgap5;Irf7;Sdc1;Hsd11b1;Ncor2;Pin1;Sdc4;Nrf1;Dusp1;Klf2;H2-T23;Cybb;H2-D1;Ifit3;Atf3;Hs…

## Sheet: S3D
Suppl Table S3D GSEA of Gene ontology terms "biological process" in IKK2caca TCL1 lymphomas vs TCL1
positive NES = enriched in IKK2caca TCL1
ID	Description	setSize	enrichmentScore	NES	pvalue	p.adjust	qvalue	rank	leading_edge	core_enrichment	core_gene_count
GO:0035456	response to interferon-beta	48	0.626219	2.42539	8.63778e-08	2.29237e-05	1.74928e-05	982	tags=33%, list=8%, signal=31%	Mndal/Ifi203/Ikbke/Gbp2/Xaf1/Stat1/Traf3ip3/Gbp7/Ifi214/Oas1a/Sting1/Ifi211/Trim6/Gbp3/Shfl/Oas1c	16
GO:0035458	cellular response to interferon-beta	41	0.635109	2.37067	3.60009e-07	7.8171e-05	5.96513e-05	498	tags=29%, list=4%, signal=28%	Mndal/Ifi203/Gbp2/Stat1/Traf3ip3/Gbp7/Ifi214/Oas1a/Sting1/Ifi211/Trim6/Gbp3	12
GO:0140971	regulation of AIM2 inflammasome complex assembly	11	0.845192	2.24579	8.30681e-06	0.000525153	0.000400737	216	tags=36%, list=2%, signal=36%	Mndal/Ifi203/Gbp2/Ifi214	4
GO:0033120	positive regulation of RNA splicing	42	0.577461	2.17395	3.41374e-05	0.00151413	0.00115541	1990	tags=45%, list=16%, signal=38%	Upf3b/Eif4a3/Cirbp/Srsf5/Smn1/Zpr1/Prmt5/Hspa8/Eif1/Rbm22/Lmntd2/Tra2b/Exosc10/Nup98/Hnrnpk/Wdr77/Rbmx/Upf3a/Prdx6	19
GO:0140970	AIM2 inflammasome complex assembly	13	0.784275	2.17313	4.56179e-05	0.00192847	0.00147159	216	tags=31%, list=2%, signal=30%	Mndal/Ifi203/Gbp2/Ifi214	4
GO:0048535	lymph node development	20	0.703692	2.17243	3.42319e-05	0.00151413	0.00115541	868	tags=45%, list=7%, signal=42%	Lta/Ltb/Il15/Nfkb2/Polb/Jak3/Ccr7/Traf3ip2/Fadd	9
GO:0034508	centromere complex assembly	27	0.629142	2.1674	0.000122412	0.00392458	0.00299479	3378	tags=59%, list=28%, signal=43%	Cenpx/Cenpn/Dlgap5/Rnf4/Oip5/Itgb3bp/Cenpt/Cenpe/Cenpk/Sugt1/Nasp/Mis18a/Cenpi/Hjurp/H3f3b/Pogz	16
GO:0048026	positive regulation of mRNA splicing, via spliceosome	28	0.615322	2.1263	0.000134006	0.00412997	0.00315152	2877	tags=61%, list=24%, signal=46%	Upf3b/Eif4a3/Cirbp/Prmt5/Hspa8/Eif1/Lmntd2/Tra2b/Exosc10/Nup98/Wdr77/Rbmx/Upf3a/Prdx6/Snw1/Slirp/Thrap3	17
GO:0050685	positive regulation of mRNA processing	31	0.594997	2.09743	9.05478e-05	0.00318049	0.00242699	3546	tags=65%, list=29%, signal=46%	Upf3b/Eif4a3/Cirbp/Prmt5/Hspa8/Eif1/Lmntd2/Tra2b/Exosc10/Nup98/Wdr77/Rbmx/Upf3a/Prdx6/Snw1/Slirp/Thrap3/Ccnb1/Ncl/Clns1a	20
GO:0002396	MHC protein complex assembly	15	0.71937	2.06961	0.00037093	0.00773353	0.00590135	2259	tags=60%, list=19%, signal=49%	Iglc4/H2-Oa/Tapbpl/H2-Eb2/B2m/H2-Eb1/H2-DMa/H2-DMb2/H2-Ab1	9
GO:0002501	peptide antigen assembly with MHC protein complex	15	0.71937	2.06961	0.00037093	0.00773353	0.00590135	2259	tags=60%, list=19%, signal=49%	Iglc4/H2-Oa/Tapbpl/H2-Eb2/B2m/H2-Eb1/H2-DMa/H2-DMb2/H2-Ab1	9
GO:0000054	ribosomal subunit export from nucleus	16	0.687384	2.01595	0.000674358	0.011757	0.00897157	3018	tags=56%, list=25%, signal=42%	Nmd3/Ltv1/Lsg1/Xpo1/Npm1/Nup88/Rps15/Rasl2-9/Ran	9
GO:0033750	ribosome localization	16	0.687384	2.01595	0.000674358	0.011757	0.00897157	3018	tags=56%, list=25%, signal=42%	Nmd3/Ltv1/Lsg1/Xpo1/Npm1/Nup88/Rps15/Rasl2-9/Ran	9
GO:0009072	aromatic amino acid metabolic process	18	0.661163	1.9993	0.000309484	0.00695731	0.00530903	1515	tags=50%, list=12%, signal=44%	Il4i1/Kynu/Haao/Hdc/Gstz1/Pcbd2/Mthfd1/Mthfd2l/Gcdh	9
GO:0002399	MHC class II protein complex assembly	11	0.749355	1.99114	0.0010198	0.0150138	0.0114568	2259	tags=73%, list=19%, signal=59%	Iglc4/H2-Oa/H2-Eb2/B2m/H2-Eb1/H2-DMa/H2-DMb2/H2-Ab1	8
GO:0002503	peptide antigen assembly with MHC class II protein complex	11	0.749355	1.99114	0.0010198	0.0150138	0.0114568	2259	tags=73%, list=19%, signal=59%	Iglc4/H2-Oa/H2-Eb2/B2m/H2-Eb1/H2-DMa/H2-DMb2/H2-Ab1	8
GO:0002920	regulation of humoral immune response	18	0.658049	1.98988	0.000348518	0.00743245	0.0056716	870	tags=44%, list=7%, signal=41%	Lta/Fcer2a/Tnf/Cr2/Cd59a/Ccr7/Gimap5/Ptpn6	8
GO:0043124	negative regulation of canonical NF-kappaB signal transduction	44	0.509274	1.94845	0.000280842	0.00657639	0.00501835	517	tags=20%, list=4%, signal=20%	Tank/Stat1/Nfkbia/Optn/Tnfaip3/Tnip1/Trim59/Zc3h12a/Nfkbil1	9
GO:0051607	defense response to virus	233	0.387492	1.94208	3.83313e-08	1.30792e-05	9.98054e-06	1233	tags=22%, list=10%, signal=20%	Mndal/Cd40/Ifi203/Trim7/Lyst/Gbp2/G3bp1/Stat1/Tnf/Rtp4/Traf3ip3/Ddx60/Gbp7/Trim12a/Ifi214/Il15/Oas1a/Oasl2/Trim30a/Sting1/Trim6/Rela/Dhx58/Trim34a/Atg14/Zc3h12a/Armc5/Ccl5/Ifngr2/Pmaip1/Atg12/Ilf3/Pqbp1/Cxcl10/Rnf135/Shfl/Traf3ip2/Atg7/Crcp/Fadd/Dtx3l/Gbp4/Mov10/Oas1c/Ddx1/Ttc4/Unc13d/Unc93b1/Trim13/Ticam2/Irf7	51
GO:0030224	monocyte differentiation	26	0.567843	1.9386	0.00161184	0.0203761	0.0155487	978	tags=27%, list=8%, signal=25%	Mndal/Ifi203/Zfp36l1/Ifi214/Bmyc/Csf1/Thoc5	7
GO:0045071	negative regulation of viral genome replication	49	0.497886	1.93831	0.000301243	0.00685256	0.00522909	982	tags=24%, list=8%, signal=23%	Mndal/Ifi203/Tnf/Ifi214/Oas1a/Oasl2/Trim6/Ccl5/Ilf3/Banf1/Shfl/Oas1c	12
GO:0002544	chronic inflammatory response	10	0.748857	1.9331	0.00108163	0.0155164	0.0118403	1377	tags=60%, list=11%, signal=53%	Lta/Tnf/Tnfaip3/Unc13d/Il10/Nfkbiz	6
GO:0051383	kinetochore organization	20	0.62152	1.91875	0.00102868	0.0150187	0.0114605	3378	tags=55%, list=28%, signal=40%	Smc4/Cenpx/Dlgap5/Rnf4/Cenpt/Cenpe/Cenpk/Sugt1/Nuf2/Ndc80/Pogz	11
GO:0002230	positive regulation of defense response to virus by host	24	0.579844	1.91439	0.00222913	0.025846	0.0197227	919	tags=33%, list=8%, signal=31%	Stat1/Sting1/Trim6/Zc3h12a/Ccl5/Pqbp1/Traf3ip2/Dtx3l	8
GO:0071391	cellular response to estrogen stimulus	12	0.694491	1.8967	0.0044426	0.0393005	0.0299897	1023	tags=58%, list=8%, signal=53%	Rara/Sfr1/Mir142/Trim24/Pelp1/Wbp2/Sra1	7
GO:0050691	regulation of defense response to virus by host	31	0.537177	1.89361	0.0010246	0.0150138	0.0114568	919	tags=29%, list=8%, signal=27%	Stat1/Il15/Sting1/Trim6/Zc3h12a/Ccl5/Pqbp1/Traf3ip2/Dtx3l	9
GO:0015937	coenzyme A biosynthetic process	11	0.709849	1.88617	0.00395725	0.0364352	0.0278032	1728	tags=64%, list=14%, signal=55%	Slc25a42/Ppcdc/Coasy/Dcakd/Acot7/Acat1/Slc25a16	7
GO:0000727	double-strand break repair via break-induced replication	11	0.708682	1.88307	0.00407901	0.0371576	0.0283545	3485	tags=91%, list=29%, signal=65%	Mcm4/Gins2/Cdc45/Mcm3/Mcm2/Mcm5/Mcm7/Mcm6/Mus81/Cdc7	10
GO:0050906	detection of stimulus involved in sensory perception	28	0.543835	1.87927	0.00237386	0.0264796	0.0202062	1322	tags=32%, list=11%, signal=29%	Pigr/Tnf/Rtp4/Grm6/Hpn/Whrn/Fyn/Rest/Serpine2	9
GO:0140374	antiviral innate immune response	48	0.48445	1.87631	0.000614052	0.0109046	0.00832112	982	tags=25%, list=8%, signal=23%	Trim7/Tnf/Traf3ip3/Oas1a/Oasl2/Sting1/Trim6/Rela/Dhx58/Cxcl10/Rnf135/Oas1c	12
GO:0051382	kinetochore assembly	16	0.636569	1.86693	0.00494103	0.0419625	0.032021	2400	tags=44%, list=20%, signal=35%	Cenpx/Dlgap5/Rnf4/Cenpt/Cenpe/Cenpk/Sugt1	7
GO:0009067	aspartate family amino acid biosynthetic process	16	0.633162	1.85693	0.00511908	0.0431116	0.0328979	2776	tags=62%, list=23%, signal=48%	Mtap/Aasdhppt/Mthfd1/Mthfd2l/Mtrr/Enoph1/Asnsd1/Asns/Adi1/Got2	10
GO:0006270	DNA replication initiation	31	0.526601	1.85633	0.00138452	0.0186306	0.0142167	3860	tags=65%, list=32%, signal=44%	Gmnn/Mcm4/Ciz1/Orc6/Kat7/Cdc45/Gins3/Cdc6/Mcm3/Mcm2/Mcm5/Orc2/Pola1/Mcm10/Mcm7/Mcm6/Prim1/Prim2/Orc4/Noc3l	20
GO:0035825	homologous recombination	37	0.503496	1.85562	0.00127846	0.0173995	0.0132773	2300	tags=51%, list=19%, signal=42%	Cep63/Cenpx/Brip1/Eme1/Cenps/Rad51/Mlh1/Rad54b/Bard1/Top2a/Brca1/Rad51d/Psmc3ip/Rad51c/Rmi1/Rad51ap1/Fancd2/Mre11a/Rbbp8	19
GO:0097202	activation of cysteine-type endopeptidase activity	18	0.612637	1.85256	0.00201606	0.0241211	0.0184065	868	tags=33%, list=7%, signal=31%	Mndal/Ifi203/Ifi214/Tbc1d10a/Ripk2/Fadd	6
GO:0002923	regulation of humoral immune response mediated by circulating immunoglobulin	12	0.677325	1.84982	0.00651853	0.0498224	0.0380188	870	tags=50%, list=7%, signal=46%	Lta/Fcer2a/Tnf/Cr2/Gimap5/Ptpn6	6
GO:0050974	detection of mechanical stimulus involved in sensory perception	13	0.662288	1.83512	0.0062154	0.0481215	0.0367209	1322	tags=46%, list=11%, signal=41%	Tnf/Hpn/Whrn/Fyn/Rest/Serpine2	6
GO:0045069	regulation of viral genome replication	73	0.43033	1.81776	0.000284509	0.00662975	0.00505907	982	tags=22%, list=8%, signal=20%	Mndal/Ifi203/Tnf/Ddx5/Gbp7/Ifi214/Oas1a/Oasl2/Trim6/Ppie/Ccl5/Ilf3/Banf1/Shfl/Rad23a/Oas1c	16
GO:0071897	DNA biosynthetic process	129	0.393764	1.81656	1.61187e-05	0.000846144	0.000645681	3248	tags=51%, list=27%, signal=38%	Tnf/Nfatc1/Pinx1/Pold4/Tk1/Polm/Trp53/Polb/Polg2/Acd/Poli/Tk2/Dscc1/Ing5/Pold2/Hnrnpc/Rfc5/Cct4/Jade2/Parn/Meaf6/Cct3/Pole/Lig1/Hrob/Kat7/Ptges3/Gch1/Exosc10/Rfc3/Cct7/Stn1/Prkd2/Ddx39b/Pcna/Pnkp/Rfc2/Map2k7/Aurkb/Atr/Rrm1/Dusp1/Atm/Dtl/Xrcc5/Lig3/Pclaf/Ctc1/Nhp2/Chek1/Cct2/Polg/Faap20/Rev3l/Jade1/Cct6a/Ten1/Pola1/Primpol/Ccna2/Rev1/Poldip2/Nat10/Hnrnpu/Wrap53/Dnajc2	66
GO:0001961	positive regulation of cytokine-mediated signaling pathway	44	0.472918	1.80935	0.00140593	0.0188127	0.0143557	1424	tags=30%, list=12%, signal=26%	Cd40/Ikbke/Sting1/Trim6/Traf2/Ripk2/Casp4/Csf1/Fadd/Laptm5/Ticam2/Irf7/Pafah1b1	13
GO:0009435	NAD biosynthetic process	10	0.698872	1.80407	0.0048687	0.041606	0.031749	1945	tags=50%, list=16%, signal=42%	Nadsyn1/Kynu/Haao/Nampt/Nmnat3	5
GO:1901796	regulation of signal transduction by p53 class mediator	65	0.436787	1.79907	0.00102364	0.0150138	0.0114568	2193	tags=43%, list=18%, signal=36%	Cep63/Ddx5/Triap1/Mlf1/Trim24/Trp53/Bmyc/Pmaip1/Hexim1/Psmd10/Marchf7/Nop53/Rpl26/Mif/Npm1/Rffl/Hnrnpk/Ubb/Rps15/Cdk5rap3/Atr/Atm/Cops3/Bcl2l12/Mdm4/Cd74/Rps20/Znhit1	28
GO:0044743	protein transmembrane import into intracellular organelle	35	0.491007	1.7854	0.00484879	0.0415101	0.0316758	1452	tags=29%, list=12%, signal=25%	Pex16/Romo1/Grpel2/Hspa8/Tomm20/Pex7/Lonp2/Trim37/Pex13/Pex14	10
GO:0031577	spindle checkpoint signaling	52	0.450311	1.78412	0.0023037	0.0262018	0.0199942	3408	tags=50%, list=28%, signal=36%	Spdl1/Cdk5rap2/Spc25/Haspin/Knl1/Stil/Spc24/Lcmt1/Aurka/Bub1/Cenpe/Birc5/Aurkb/Cdca8/Dusp1/Atm/Zwint/Ska1/Plk1/Zwilch/Diaph3/Nuf2/Klhl22/Ccnb1/Ndc80/Cdc20	26
GO:0007131	reciprocal meiotic recombination	30	0.510292	1.78291	0.00328372	0.0321133	0.0245052	2081	tags=50%, list=17%, signal=42%	Cep63/Cenpx/Brip1/Eme1/Cenps/Rad51/Mlh1/Rad54b/Top2a/Rad51d/Psmc3ip/Rad51c/Rmi1/Rad51ap1/Fancd2	15
GO:0140527	reciprocal homologous recombination	30	0.510292	1.78291	0.00328372	0.0321133	0.0245052	2081	tags=50%, list=17%, signal=42%	Cep63/Cenpx/Brip1/Eme1/Cenps/Rad51/Mlh1/Rad54b/Top2a/Rad51d/Psmc3ip/Rad51c/Rmi1/Rad51ap1/Fancd2	15
GO:0009615	response to virus	286	0.345557	1.77505	4.67602e-07	8.72735e-05	6.65972e-05	1233	tags=20%, list=10%, signal=18%	Mndal/Cd40/Ifi203/Ikbke/Trim7/Lyst/Gbp2/G3bp1/Stat1/Tnf/Rtp4/Traf3ip3/Ddx60/Gbp7/Trim12a/Ifi214/Il15/Oas1a/Oasl2/Trim30a/Sting1/Trim6/Rela/Dhx58/2410002F23Rik/Trim34a/Atg14/Zc3h12a/Armc5/Ccl5/Ifngr2/Pmaip1/Atg12/Ilf3/Pqbp1/Cxcl10/Rnf135/Shfl/Traf3ip2/Nmi/Atg7/Crcp/Fadd/Dtx3l/Gbp4/Mov10/Oas1c/Ddx1/Eef1g/Ttc4/Unc13d/Unc93b1/Trim13/Il12a/Ticam2/Irf7	56
GO:0071174	mitotic spindle checkpoint signaling	48	0.455199	1.76302	0.00215096	0.0251225	0.0191707	2067	tags=38%, list=17%, signal=31%	Spdl1/Cdk5rap2/Spc25/Haspin/Knl1/Stil/Spc24/Lcmt1/Bub1/Cenpe/Birc5/Aurkb/Cdca8/Dusp1/Atm/Zwint/Ska1/Plk1	18
GO:0042832	defense response to protozoan	28	0.508428	1.75692	0.00637725	0.0490141	0.037402	1984	tags=46%, list=16%, signal=39%	Cd40/Lyst/Gbp2/Gbp7/Gbp3/Slc11a1/Gbp4/Il10/Il12a/Gbp9/Bpgm/Batf/Gbp8	13
GO:0032508	DNA duplex unwinding	63	0.426347	1.75474	0.00137875	0.0186053	0.0141974	3662	tags=57%, list=30%, signal=40%	G3bp1/Fbh1/Mcm4/Brip1/Dscc1/Rad51/Rfc5/Ddx1/Gins2/Cdc45/Top2a/Rfc3/Gins3/Rfc2/Ascc3/Rtel1/Mre11a/Chd1l/Xrcc5/Mcm8/Mcm3/Recql4/Mcm2/Mcm5/Supv3l1/Mcm7/Blm/Ercc3/Zgrf1/Mcm6/Gins1/Twnk/Ddx3x/Chd8/Rfc4/Rad50	36
GO:0032392	DNA geometric change	68	0.423651	1.75031	0.00116759	0.0163566	0.0124815	3662	tags=57%, list=30%, signal=40%	G3bp1/Fbh1/Mcm4/Brip1/Dscc1/Rad51/Rfc5/Hnrnpa2b1/Ddx1/Gins2/Cdc45/Top2a/Rfc3/Gins3/Rfc2/Ascc3/Rtel1/Mre11a/Chd1l/Xrcc5/Mcm8/Mcm3/Recql4/Mcm2/Mcm5/Zranb3/Supv3l1/Mcm7/Blm/Ercc3/Zgrf1/Hmgb1/Mcm6/Gins1/Twnk/Ddx3x/Chd8/Rfc4/Rad50	39
GO:0140236	translation at presynapse	46	0.454928	1.74941	0.00242964	0.0268046	0.0204542	3266	tags=52%, list=27%, signal=38%	Rpl32/Rpl23a/Rps5/Rpl34/Rps27a/Rpl35/Rpl4/Rpl17/Rps14/Rpl26/Rps11/Uba52/Rpl38/Rps27/Rpl28/Rpl15/Rpl36a/Rps24/Rpl7a/Rpl29/Rpl37a/Rpl23/Rps26/Rps15a	24
GO:0048525	negative regulation of viral process	85	0.404894	1.74865	0.000435974	0.008663	0.00661062	982	tags=20%, list=8%, signal=19%	Mndal/Ifi203/Stat1/Tnf/Trim12a/Ifi214/Oas1a/Oasl2/Trim30a/Trim59/Trim6/Ccl5/Ilf3/Banf1/Shfl/Hexim1/Oas1c	17
GO:0060760	positive regulation of response to cytokine stimulus	48	0.450733	1.74572	0.00266951	0.0284015	0.0216728	1424	tags=27%, list=12%, signal=24%	Cd40/Ikbke/Sting1/Trim6/Traf2/Ripk2/Casp4/Csf1/Fadd/Laptm5/Ticam2/Irf7/Pafah1b1	13
GO:0006959	humoral immune response	76	0.407096	1.74124	0.00103777	0.0150681	0.0114983	1776	tags=32%, list=15%, signal=27%	Lta/Fcer2a/Tfe3/Cfp/Tnf/Cr2/Romo1/Ighg2b/Rps19/Ccl5/Ctsg/B2m/Cd59a/Cxcl10/Ccr7/Gimap5/Traf3ip2/Ptpn6/Adm/Hmgn2/Pglyrp1/H2-DMa/Igha/Fau	24
GO:0006261	DNA-templated DNA replication	142	0.371727	1.73979	4.31695e-05	0.00185784	0.0014177	3662	tags=52%, list=30%, signal=37%	Gmnn/Pold4/Cenpx/Fbh1/Tk1/Mcm4/Eme1/Ilkap/Polg2/Tk2/Dscc1/Cenps/Pold2/Rad51/Ciz1/Rfc5/Zpr1/Atg7/Orc6/Pole/Lig1/Kat7/Bard1/Gins2/Senp2/Cdc45/Rfc3/Brca1/Pole4/Pcna/Gins3/Rfc2/Tipin/Atr/Cdc6/Rrm1/Rtel1/Mre11a/Wdr18/Lig3/Mcm3/Asf1a/Rbbp8/Recql4/Exo1/Polg/Smarcal1/Mcm2/Fam111a/Mcm5/Rfwd3/Zranb3/Orc2/Pola1/Primpol/Mcm10/Wdhd1/Mcm7/Blm/Fbxo5/Timeless/Mcm6/Prim1/Polrmt/Mus81/Gins1/Cdc7/Twnk/Mms22l/Prim2/…	74
GO:1901991	negative regulation of mitotic cell cycle phase transition	156	0.365371	1.73712	5.48018e-05	0.0021999	0.00167871	3197	tags=44%, list=26%, signal=33%	Zfp36l1/Spdl1/Pinx1/Gpr132/Crlf3/Rbm38/Trp53/Sde2/Babam1/Syf2/Rpa2/Mrnip/Cdk5rap2/Cdkn2b/Spc25/Ccng1/Plk3/Haspin/Zfp655/Knl1/Ezh2/Spc24/Dlg1/Bard1/Brcc3/Nop53/Rpl26/Brca1/Lcmt1/Tpra1/Fzr1/Bub1/Cdk5rap3/Cenpe/Birc5/Mbd4/Aurkb/Atr/Pkmyt1/Cdc6/Cdca8/Dusp1/Atm/Dtl/Zwint/Ska1/Plk1/Zfyve19/Mre11a/Zc3h12d/Miip/Rbbp8/Babam2/Nabp2/Cdk1/Chek1/Hus1/Zwilch/Jade1/Rfwd3/Inip/Prmt2/Blm/Fbxo5/Pidd1/Wee1/Nuf2/Klh…	69
GO:0140241	translation at synapse	47	0.450796	1.73306	0.00229802	0.0262018	0.0199942	3266	tags=51%, list=27%, signal=38%	Rpl32/Rpl23a/Rps5/Rpl34/Rps27a/Rpl35/Rpl4/Rpl17/Rps14/Rpl26/Rps11/Uba52/Rpl38/Rps27/Rpl28/Rpl15/Rpl36a/Rps24/Rpl7a/Rpl29/Rpl37a/Rpl23/Rps26/Rps15a	24
GO:0140242	translation at postsynapse	47	0.450796	1.73306	0.00229802	0.0262018	0.0199942	3266	tags=51%, list=27%, signal=38%	Rpl32/Rpl23a/Rps5/Rpl34/Rps27a/Rpl35/Rpl4/Rpl17/Rps14/Rpl26/Rps11/Uba52/Rpl38/Rps27/Rpl28/Rpl15/Rpl36a/Rps24/Rpl7a/Rpl29/Rpl37a/Rpl23/Rps26/Rps15a	24
GO:0071479	cellular response to ionizing radiation	69	0.416975	1.72994	0.00147127	0.0193231	0.0147452	2785	tags=42%, list=23%, signal=33%	Mndal/Tank/Ifi203/Tnf/Ifi214/Rad9b/Trp53/Fignl1/Rad51/Rnf4/Net1/Bard1/Brcc3/Rpl26/Brca1/Gadd45a/Spidr/H2ax/Atr/Rad51ap1/Atm/Elk1/Xrcc5/Babam2/Grb2/Hus1/Rhno1/Ifi206/Rhob	29
GO:0033047	regulation of mitotic sister chromatid segregation	55	0.428508	1.72913	0.00229783	0.0262018	0.0199942	3408	tags=51%, list=28%, signal=37%	Spdl1/Cdk5rap2/Spc25/Haspin/Knl1/Spc24/Lcmt1/Bub1/Cenpe/Birc5/Aurkb/Cdca8/Dusp1/Atm/Becn1/Zwint/Ska1/Plk1/Cdk1/Zwilch/Fbxo5/Nuf2/Hnrnpu/Kat2b/Klhl22/Ccnb1/Ndc80/Cdc20	28
GO:2000278	regulation of DNA biosynthetic process	81	0.400034	1.72473	0.000940201	0.0141237	0.0107776	1943	tags=40%, list=16%, signal=33%	Tnf/Nfatc1/Pinx1/Trp53/Polg2/Acd/Dscc1/Ing5/Hnrnpc/Rfc5/Cct4/Jade2/Parn/Meaf6/Cct3/Kat7/Ptges3/Gch1/Exosc10/Rfc3/Cct7/Stn1/Prkd2/Ddx39b/Pcna/Pnkp/Rfc2/Map2k7/Aurkb/Atr/Dusp1/Atm	32
GO:0019724	B cell mediated immunity	112	0.381977	1.72129	0.000351945	0.00747219	0.00570193	1709	tags=32%, list=14%, signal=28%	Ighv13-2/Cd40/Lta/Fcer2a/Ighv1-9/Iglc1/Tnf/Cr2/Ighv1-12/Il21r/Iglc2/Ung/Ighg2b/Ighv1-75/Il27ra/Ighv7-3/Mlh1/Swap70/Gimap5/Traf3ip2/Shld1/Ptpn6/Cd19/Ighd/Xrcc4/Nsd2/Icosl/H2-M3/Parp3/Irf7/Nfkbiz/Ccr6/Ercc1/H2-DMa/Igha/Batf	36
GO:0006260	DNA replication	237	0.343929	1.72097	6.9201e-06	0.00045284	0.000345556	3255	tags=46%, list=27%, signal=34%	Fhit/Rbbp4/Gmnn/Pold4/Cenpx/Fbh1/Tk1/Mcm4/Rbbp7/Trp53/Eme1/Polb/Ilkap/Polg2/Poli/Tk2/Sde2/Dscc1/Id3/Ing5/Cenps/Ino80c/Pold2/Rad51/Rpa3/Rpa2/Ciz1/Rfc5/Esco1/Ino80e/Mapk8/Jade2/Zpr1/Lpin1/Atg7/Meaf6/Orc6/Pole/Lig1/Kat7/Ssrp1/Tbrg1/Chaf1b/Bard1/Gins2/Senp2/Cdc45/Rfc3/Brca1/Stn1/Npm1/Esco2/Tspyl2/Faf1/Gtpbp4/Pole4/Pcna/Gins3/Rfc2/Tipin/Tfpt/Atr/Cdc6/Rrm1/Rmi1/Dtl/Rtel1/Mre11a/Wdr18/Grwd1/Lig3/Pclaf/M…	108
GO:0046637	regulation of alpha-beta T cell differentiation	55	0.425489	1.71694	0.00274291	0.0288466	0.0220124	938	tags=27%, list=8%, signal=25%	Zap70/Rara/Il2rg/Cd83/Sh3rf1/Cd1d1/Smad7/Zc3h12a/Jak3/Ripk2/Runx3/Runx1/Ccr7/Gimap5/Cd69	15
GO:0070266	necroptotic process	31	0.486469	1.71486	0.00549891	0.0449031	0.0342649	1113	tags=29%, list=9%, signal=26%	Casp6/Tnf/Pygl/Birc3/Rbck1/Trp53/Pgam5/Fadd/Ppif	9
GO:0016064	immunoglobulin mediated immune response	109	0.381285	1.70807	0.000394562	0.00798654	0.00609442	1709	tags=32%, list=14%, signal=28%	Ighv13-2/Cd40/Lta/Fcer2a/Ighv1-9/Iglc1/Tnf/Cr2/Ighv1-12/Il21r/Iglc2/Ung/Ighg2b/Ighv1-75/Il27ra/Ighv7-3/Mlh1/Swap70/Gimap5/Traf3ip2/Shld1/Ptpn6/Cd19/Ighd/Xrcc4/Nsd2/Icosl/Parp3/Irf7/Nfkbiz/Ccr6/Ercc1/H2-DMa/Igha/Batf	35
GO:0019079	viral genome replication	101	0.384238	1.70741	0.000470742	0.00895911	0.00683657	982	tags=20%, list=8%, signal=18%	Mndal/Ifi203/Tnf/Ddx5/Gbp7/Ifi214/Oas1a/Oasl2/Trim6/Atg16l2/Zc3h12a/Ppie/Ccl5/Ilf3/Banf1/Shfl/Atg7/Hspa8/Rad23a/Oas1c	20
GO:0002181	cytoplasmic translation	156	0.358835	1.70605	8.79456e-05	0.00313275	0.00239056	2282	tags=31%, list=19%, signal=25%	Rpl32/Rpl32l/Rpl22l1/Rpl23a/Rpl18a/Rps5/Rps9/Unk/Rps19/Drg2/Rpl39l/Csde1/Eif2d/Eif3f/Rpl34/Rps27a/Ncbp2/Rpl41/Rpl35/Rpl4/Cnbp/Rpl17/Rps14/Eif2b2/Gm6133/Eif4a2/Rpl26/Eif3m/Rwdd1/Ythdf2/Rps11/Uba52/Rplp0/Rpl38/Rpl9-ps1/Cpeb4/Eif2b3/Rps15/Rpl9-ps6/Rpl31/Rps18/Mettl3/Rpl28/Rpl15/Rps20/Rpl36-ps12/Eif2b1/Rpl36a	48
GO:0007094	mitotic spindle assembly checkpoint signaling	46	0.440786	1.69503	0.00440217	0.0390877	0.0298273	2067	tags=37%, list=17%, signal=31%	Spdl1/Cdk5rap2/Spc25/Haspin/Knl1/Spc24/Lcmt1/Bub1/Cenpe/Birc5/Aurkb/Cdca8/Dusp1/Atm/Zwint/Ska1/Plk1	17
GO:0071173	spindle assembly checkpoint signaling	46	0.440786	1.69503	0.00440217	0.0390877	0.0298273	2067	tags=37%, list=17%, signal=31%	Spdl1/Cdk5rap2/Spc25/Haspin/Knl1/Spc24/Lcmt1/Bub1/Cenpe/Birc5/Aurkb/Cdca8/Dusp1/Atm/Zwint/Ska1/Plk1	17
GO:0032481	positive regulation of type I interferon production	68	0.407323	1.68285	0.00276156	0.0288665	0.0220276	2061	tags=31%, list=17%, signal=26%	Tank/Ikbke/Arrdc4/G3bp1/Stat1/Traf3ip3/Oas1a/Sting1/Dhx58/Pqbp1/Rnf135/Oas1c/Ticam2/Irf7/Zcchc3/Hmgb2/Ptpn11/Irf3/Zbtb20/Flt3/Usp22	21
GO:0006302	double-strand break repair	267	0.328222	1.67225	4.71217e-06	0.000355604	0.000271357	3232	tags=44%, list=27%, signal=33%	Vps72/Sfr1/Nudt16l1/Cdca5/Uvrag/Fbh1/Hpf1/Ing3/Aste1/Mcm4/Polm/Trp53/Brip1/Smarce1/Eme1/Polb/Fignl1/Parp2/Babam1/Rad51/Rpa3/Rpa2/Mlh1/Mrnip/Tdp1/Rnf138/Shld1/Meaf6/Nsmce1/Dtx3l/Rad54b/Ep400/Xrcc4/Nsd2/Lig1/Paxx/Ddx1/Ppp4c/Parp3/Gins2/Brcc3/Senp3/Cdc45/Bcl7a/Brca1/Dpf2/Rec8/Rad51d/Ercc1/Otub1/Esco2/Rad51b/Slf1/Pnkp/Mrgbp/Rad51c/Spidr/H2ax/Smarca2/Atr/Rmi1/Rad51ap1/Atm/Htatsf1/Dek/Rtel1/Dclre1a/Sma…	117
GO:0042254	ribosome biogenesis	301	0.320501	1.65655	5.72001e-06	0.000402589	0.00030721	3340	tags=39%, list=27%, signal=29%	Nmd3/Pop5/Sirt7/Rexo4/Znhit6/Eif4a3/Fdxacb1/Mrps2/Mphosph10/Rps5/Fastkd2/Dnttip2/Rps9/Bud23/Gnl2/Rps19/Mettl16/Mrpl10/Pno1/Sde2/Ngdn/Exosc2/Zfp593/Noc4l/Mrm3/Rpusd2/Pelp1/C1d/Nsun3/Rps27a/Dhx37/Pih1d1/Rpl35/Rbm34/Gtf3a/Rps14/Ddx52/Efl1/Wbp11/Tsr2/Usp16/Rexo1/Wdr74/Urb1/Exosc10/Nop53/Rpl26/Ltv1/Lsg1/Xpo1/Npm1/Glul/Rrp9/Ythdf2/Rps11/Rps27rt/Rplp0/Rpl38/Gtpbp4/Aatf/Rps27/Wdr36/Abt1/Trmt2b/Dhx30/Znhi…	117
GO:0045930	negative regulation of mitotic cell cycle	187	0.339556	1.65066	7.32532e-05	0.00282202	0.00215344	2556	tags=35%, list=21%, signal=28%	Tnf/Zfp36l1/Spdl1/Pinx1/Rad9b/Gpr132/Crlf3/Rbm38/Trp53/Eme1/Sde2/Babam1/Syf2/Rpa2/Mrnip/Cdk5rap2/Cdkn2b/Spc25/Ccng1/Plk3/Haspin/Zfp655/Knl1/Stil/Ezh2/Spc24/Dlg1/Bard1/Brcc3/Nop53/Rpl26/Brca1/Lcmt1/Tpra1/Cdkn1b/Fzr1/Bub1/Tipin/Cdk5rap3/Cenpe/Birc5/Mbd4/Aurkb/Atr/Pkmyt1/Cdc6/Cdca8/Dusp1/Atm/Dtl/Zwint/Ska1/Plk1/Fancd2/Zfyve19/Mre11a/Zc3h12d/Miip/Rbbp8/Babam2/Nabp2/Angel2/Cdk1/Chek1/Hus1/Zwilch	66
GO:0045839	negative regulation of mitotic nuclear division	53	0.412133	1.65055	0.00603227	0.0474546	0.036212	3408	tags=49%, list=28%, signal=35%	Spdl1/Cdk5rap2/Spc25/Haspin/Knl1/Spc24/Lcmt1/Bub1/Cenpe/Birc5/Aurkb/Cdca8/Dusp1/Atm/Zwint/Ska1/Plk1/Chek1/Zwilch/Fbxo5/Nuf2/Klhl22/Ccnb1/Ndc80/Esr1/Cdc20	26
GO:0007093	mitotic cell cycle checkpoint signaling	137	0.35413	1.64909	0.000390716	0.00794234	0.00606069	2556	tags=37%, list=21%, signal=30%	Spdl1/Rad9b/Rbm38/Trp53/Eme1/Sde2/Babam1/Syf2/Rpa2/Mrnip/Cdk5rap2/Spc25/Ccng1/Plk3/Haspin/Knl1/Stil/Spc24/Bard1/Brcc3/Nop53/Rpl26/Brca1/Lcmt1/Fzr1/Bub1/Tipin/Cdk5rap3/Cenpe/Birc5/Mbd4/Aurkb/Atr/Cdc6/Cdca8/Dusp1/Atm/Dtl/Zwint/Ska1/Plk1/Fancd2/Zfyve19/Mre11a/Rbbp8/Babam2/Nabp2/Cdk1/Chek1/Hus1/Zwilch	51
GO:0045132	meiotic chromosome segregation	63	0.400675	1.64908	0.00576	0.0462446	0.0352886	2094	tags=38%, list=17%, signal=32%	Smc4/Cep63/Sirt7/Sgo1/Brip1/Mlh1/Ska2/Haspin/Knl1/Ncaph/Top2a/BC005624/Rec8/Aurka/Psmc3ip/Actr3/Cenpe/Atm/Zwint/Ccnb2/Ska1/Plk1/Fancd2/Mre11a	24
GO:0048024	regulation of mRNA splicing, via spliceosome	88	0.379846	1.64757	0.00174688	0.021675	0.0165399	2877	tags=44%, list=24%, signal=34%	Ddx5/Upf3b/Eif4a3/Cirbp/Mettl16/Prmt5/Sf1/Hspa8/Hnrnpa2b1/Eif1/Rbm39/Lmntd2/Tra2b/Rest/Exosc10/Nup98/Npm1/Srsf2/Srsf10/Srrm1/Acin1/Hnrnpk/Wdr77/Rbmx/Upf3a/Rbm7/Prdx6/Ptbp1/Snw1/Rbm15/Srsf7/Sap18b/Magoh/Jmjd6/Slirp/Larp7/Rbm8a/Smu1/Thrap3	39
GO:0007098	centrosome cycle	117	0.36064	1.63873	0.000709423	0.0120559	0.00919965	3457	tags=48%, list=28%, signal=35%	Nubp1/Cep63/Chd3/Uvrag/Chmp2b/Sgo1/Haus5/Ccnl1/Pard6g/Plk4/Cdk5rap2/Cep295/Fbxw5/Mapk8/Cep68/Haus3/Cntln/Trim37/Stil/Poc1a/Brca1/Gadd45a/Pard6a/Cep44/Xpo1/Npm1/Ppp1r35/Ndel1/Bbs4/Aurka/Kif11/Rbm14/Cntrob/Arhgef10/Dctn1/Plk1/Kif15/Pclaf/Ppp1r12a/Nup62/Chek1/Mcph1/Haus4/Cep72/Poc1b/Haus1/Ranbp1/Nat10/Kat2b/Tmem67/Ndc80/Haus6/Wdr62/Haus7/Nek2/Ckap5	56
GO:0045824	negative regulation of innate immune response	68	0.396055	1.6363	0.00515746	0.0432232	0.032983	2076	tags=32%, list=17%, signal=27%	Mndal/Ifi203/Cep63/Tnfaip3/Ifi214/Oas1a/Dhx58/Rps19/Atg12/Banf1/Nmi/Ptpn6/Oas1c/H2-M3/Lgals9/Ythdf2/Pim1/Ptpn2/Aurkb/Eif4e2/Mettl3/Cnot7	22
GO:0050000	chromosome localization	106	0.367117	1.63592	0.000926554	0.0140513	0.0107223	2151	tags=31%, list=18%, signal=26%	Cep63/Spdl1/Pinx1/Cdca5/Chmp2b/Cenpf/Sgo1/Mlh1/Ska2/Kif2c/Spc25/Nudc/Knl1/Spc24/Nup98/Ndel1/Kif22/Map1s/Dsn1/Actr3/Spag5/Nsl1/Cenpe/Birc5/Aurkb/Kif18a/Ttl/Cdca8/Atm/Becn1/Zwint/Ska1/Snhg15	33
GO:0010212	response to ionizing radiation	132	0.352184	1.63	0.00071916	0.0120966	0.00923073	3071	tags=37%, list=25%, signal=28%	Mndal/Tank/Ifi203/Tnf/Ifi214/Rad9b/Trp53/Polb/Fignl1/Babam1/Bmyc/Rad51/Pmaip1/Mrnip/Rnf4/Net1/Rad54b/Xrcc4/Bard1/Brcc3/Rpl26/Brca1/Gadd45a/Ercc1/Tigar/Spidr/H2ax/Atr/Rrm1/Rad51ap1/Atm/Fancd2/Elk1/Xrcc5/Babam2/Nabp2/Eya1/Grb2/Dnmt3a/Hus1/Rhno1/Rfwd3/Ifi206/Rhob/Nek1/Inip/Blm/Ccnd2/Bax	49
GO:0002460	adaptive immune response based on somatic recombination of immune receptors built from immunoglobulin superfamily domains	243	0.325639	1.62971	4.40807e-05	0.00188012	0.0014347	1716	tags=28%, list=14%, signal=25%	Ighv13-2/Cd40/Lta/Relb/Il4i1/Lyst/Fcer2a/Ighv1-9/Cd27/Iglc1/Stat4/Tnf/Cr2/Tnfaip3/Ighv1-12/Il21r/Iglc2/Nfkb2/Ung/Klhl6/Traf2/Cd1d1/Smad7/Ighg2b/Zc3h12a/Ighv1-75/Il27ra/Ighv7-3/Jak3/H2-Q6/Mlh1/B2m/Ripk2/Dpp4/Swap70/Slc11a1/Ccr7/Gimap5/Traf3ip2/Nlrp10/Shld1/Fadd/Ptpn6/Hspa8/Cd69/Cd19/Ighd/Xrcc4/Nsd2/Icosl/H2-M3/Parp3/Unc13d/Unc93b1/Dlg1/Il12a/Irf7/Nfkbiz/Ccr6/Ufl1/Ercc1/H2-Q7/H2-Q4/H2-DMa/Stard7/Ig…	69
GO:0032543	mitochondrial translation	126	0.35331	1.62767	0.000702288	0.0120166	0.00916974	3291	tags=42%, list=27%, signal=31%	Mrpl45/Mrps2/Fastkd2/Mrps6/Mrpl10/Mrpl32/Aurkaip1/Alkbh1/Mrps16/Nsun3/Mrpl38/Mrpl17/Gadd45gip1/Mrpl11/Mrpl58/Cdk5rap1/Mrps31/Mrpl55/Mtif2/Ears2/Mrpl24/Mettl8/Mrpl15/Mrps26/Mtg1/Mrpl54/Mrpl35/Coa3/Mrpl19/Mrpl12/Mrpl52/Mrpl40/Mrps28/Mrps34/Mrpl47/Gatb/Mrpl21/Mrpl48/Mrpl9/Mrpl41/Mrps30/Mrps23/Mrpl27/Qrsl1/Mrps15/Dap3/Mrpl33/Mrps7/Mrpl14/Mrps17/Rcc1l/Mtg2/Mrps24	53
GO:0051303	establishment of chromosome localization	100	0.367444	1.62562	0.00126847	0.0173127	0.0132111	2151	tags=31%, list=18%, signal=26%	Cep63/Spdl1/Pinx1/Cdca5/Chmp2b/Cenpf/Sgo1/Mlh1/Ska2/Kif2c/Spc25/Nudc/Knl1/Spc24/Ndel1/Kif22/Map1s/Dsn1/Spag5/Nsl1/Cenpe/Birc5/Aurkb/Kif18a/Ttl/Cdca8/Atm/Becn1/Zwint/Ska1/Snhg15	31
GO:0071103	DNA conformation change	77	0.376351	1.60882	0.00448791	0.0395549	0.0301838	3662	tags=52%, list=30%, signal=37%	G3bp1/Fbh1/Mcm4/Brip1/Dscc1/Rad51/Rfc5/Hnrnpa2b1/Ddx1/Gins2/Cdc45/Top2a/Rfc3/Hmgb2/Gins3/Rfc2/Ascc3/Rtel1/Mre11a/Chd1l/Xrcc5/Mcm8/Mcm3/Recql4/Mcm2/Mcm5/Zranb3/Supv3l1/Mcm7/Blm/Ercc3/Zgrf1/Hmgb1/Mcm6/Gins1/Twnk/Ddx3x/Chd8/Rfc4/Rad50	40
GO:1901988	negative regulation of cell cycle phase transition	225	0.320387	1.60373	8.85328e-05	0.00313275	0.00239056	3199	tags=41%, list=26%, signal=31%	Cep63/Zfp36l1/Spdl1/Pinx1/Rad9b/Gpr132/Crlf3/Rbm38/Trp53/Eme1/Sde2/Babam1/Rad51/Ccar2/Syf2/Rpa2/Mrnip/Cdk5rap2/Cdkn2b/Spc25/Dtx3l/Ccng1/Plk3/Haspin/Zfp655/Knl1/Stil/Ezh2/Spc24/Dlg1/Bard1/Brcc3/Nop53/Rpl26/Brca1/Tiprl/Lcmt1/Ufl1/E2f1/Tpra1/Aurka/Tmsb4x/Fzr1/H2ax/Bub1/Ptpn11/Tipin/Cdk5rap3/Cenpe/Birc5/Mbd4/Aurkb/Atr/Pkmyt1/Cdc6/Cdca8/Dusp1/Atm/Dtl/Zwint/Ska1/Plk1/Fancd2/Zfyve19/Mre11a/Zc3h12d/Gnb1l…	93
GO:0002250	adaptive immune response	311	0.309698	1.59646	1.39177e-05	0.000782172	0.000596865	1837	tags=27%, list=15%, signal=24%	Zap70/Ighv13-2/Cd40/Lta/Relb/Nedd4/Il4i1/Lyst/Fcer2a/Tfe3/Ighv1-9/Cd27/Iglc1/Stat4/Tnf/Cr2/Tnfaip3/Ighv1-12/Il21r/Iglc2/Nfkb2/Ung/Klhl6/Traf2/Cd1d1/Smad7/Ighg2b/Zc3h12a/Ighv1-75/Il27ra/Ighv7-3/Jak3/H2-Q6/Mlh1/B2m/Ripk2/Dpp4/Swap70/Slc11a1/Ccr7/Gimap5/Traf3ip2/Nlrp10/Dbnl/Shld1/Fadd/Ptpn6/Hspa8/Cd69/Fyn/Samsn1/Cd19/Ighd/Xrcc4/Nsd2/Icosl/Prr7/H2-M3/Parp3/Serpina3g/Unc13d/Unc93b1/Dlg1/Il12a/Irf7/Cd3…	85
GO:0001819	positive regulation of cytokine production	303	0.308145	1.59317	1.57712e-05	0.000846144	0.000645681	1360	tags=21%, list=11%, signal=19%	Mndal/Tank/Cd40/Ifi203/Ikbke/Lta/Ltb/Arrdc4/Cd27/Rara/G3bp1/Stat1/Tnf/Rel/Cybb/Cyba/Optn/Traf3ip3/Carmil2/Ifi214/Cd83/Il15/Oas1a/Rtn4/Sting1/Trim6/Rela/Dhx58/Traf2/Cd1d1/Il27ra/Ccl5/Lurap1/B2m/Ripk2/Pqbp1/Casp4/Prg2/Rnf135/Runx1/Slc11a1/Ccr7/Gimap5/Nlrp10/Fadd/Lamtor5/Zfp580/Appl1/Oas1c/Ighd/Laptm5/Ddx1/Icosl/H2-M3/Unc93b1/Il10/Il12a/Ticam2/Irf7/Mif/Brca1/Zcchc3/Lgals9	63
GO:0010948	negative regulation of cell cycle process	254	0.313731	1.58208	7.65381e-05	0.00290177	0.0022143	2593	tags=33%, list=21%, signal=27%	Nubp1/Cep63/Zfp36l1/Spdl1/Pinx1/Rad9b/Gpr132/Crlf3/Rbm38/Trp53/Eme1/Sde2/Babam1/Rad51/Ccar2/Syf2/Rpa2/Mrnip/Cdk5rap2/Cdkn2b/Spc25/Dtx3l/Ccng1/Plk3/Haspin/Zfp655/Knl1/Trim37/Stil/Ezh2/Spc24/H2-M3/Dlg1/Bard1/Brcc3/Nop53/Rpl26/Brca1/Tiprl/Npm1/Lcmt1/Ufl1/E2f1/Tpra1/Aurka/Tmsb4x/Rbm14/Fzr1/H2ax/Bub1/Ptpn11/Tipin/Cdk5rap3/Cenpe/Birc5/Mbd4/Aurkb/Atr/Pkmyt1/Cdc6/Cdca8/Dusp1/Atm/Dtl/Zwint/Ska1/Plk1/Fancd…	85
GO:0002449	lymphocyte mediated immunity	223	0.314844	1.57775	0.000210618	0.00540927	0.00412774	1813	tags=27%, list=15%, signal=24%	Ighv13-2/Cd40/Lta/Il4i1/Lyst/Fcer2a/Ighv1-9/Iglc1/Tnf/Cr2/Hcst/Ighv1-12/Il21r/Iglc2/Ung/Traf2/Cd1d1/Smad7/Ighg2b/Ighv1-75/Il27ra/Ighv7-3/H2-Q6/Mlh1/B2m/Dpp4/Swap70/Slc11a1/Gimap5/Traf3ip2/Shld1/Fadd/Ptpn6/Hspa8/Cd19/Ighd/Xrcc4/Nsd2/Icosl/H2-M3/Parp3/Unc13d/Unc93b1/Dlg1/Il12a/Irf7/Lgals9/Nfkbiz/Ccr6/Ufl1/Ercc1/H2-Q7/H2-Q4/H2-DMa/Stard7/Igha/Sash3/Batf/H2-T10/Pdcd1/Slamf6	61
GO:0000075	cell cycle checkpoint signaling	183	0.324581	1.57449	0.000372349	0.00773353	0.00590135	2637	tags=36%, list=22%, signal=29%	Cep63/Spdl1/Rad9b/Rbm38/Trp53/Eme1/Sde2/Babam1/Rad51/Ccar2/Syf2/Rpa2/Mrnip/Cdk5rap2/Spc25/Dtx3l/Ccng1/Plk3/Haspin/Knl1/Stil/Spc24/Bard1/Brcc3/Nop53/Rpl26/Brca1/Tiprl/Lcmt1/Ufl1/E2f1/Aurka/Fzr1/H2ax/Bub1/Ptpn11/Tipin/Cdk5rap3/Cenpe/Birc5/Mbd4/Aurkb/Atr/Cdc6/Cdca8/Dusp1/Atm/Dtl/Zwint/Ska1/Plk1/Fancd2/Zfyve19/Mre11a/Gnb1l/Rbbp8/Babam2/Nabp2/Dot1l/Cdk1/Chek1/Hus1/Zwilch/Diaph3/Rhno1/Parp9	66
GO:0050792	regulation of viral process	134	0.339652	1.57301	0.000960679	0.0143861	0.0109778	1313	tags=21%, list=11%, signal=19%	Mndal/Ifi203/Stat1/Tnf/Ddx5/Gbp7/Trim12a/Ifi214/Pfn1/Oas1a/Oasl2/Trim30a/Trim59/Trim6/Trim34a/Ppie/Ccl5/Atg12/Ilf3/Banf1/Shfl/Mdfic/Rad23a/Hexim1/Oas1c/Trim13/Top2a/Vps37b	28
GO:0031023	microtubule organizing center organization	124	0.340807	1.56843	0.00200299	0.0241014	0.0183915	3457	tags=46%, list=28%, signal=33%	Nubp1/Cep63/Chd3/Uvrag/Chmp2b/Sgo1/Haus5/Ccnl1/Pard6g/Plk4/Cdk5rap2/Cep295/Fbxw5/Mapk8/Cep68/Haus3/Cntln/Trim37/Stil/Poc1a/Brca1/Gadd45a/Pard6a/Cep44/Xpo1/Npm1/Pafah1b1/Ppp1r35/Ndel1/Bbs4/Aurka/Kif11/Rbm14/Cntrob/Arhgef10/Dctn1/Plk1/Kif15/Pclaf/Ppp1r12a/Nup62/Chek1/Mcph1/Haus4/Cep72/Poc1b/Haus1/Ranbp1/Nat10/Kat2b/Tmem67/Ndc80/Haus6/Wdr62/Haus7/Nek2/Ckap5	57
GO:0000375	RNA splicing, via transesterification reactions	247	0.311198	1.56337	0.000140456	0.00424068	0.003236	2048	tags=27%, list=17%, signal=23%	Ddx5/Upf3b/Eif4a3/Snrpd1/Dcps/Sf3b2/Cirbp/Ppie/Mettl16/Sde2/Hnrnpc/Syf2/Srsf5/Ilf3/Snrpb2/Pqbp1/Scnm1/Smn1/Prmt5/Ncbp2/Snrpert/Lsm3/Sf1/Hspa8/Hnrnpa2b1/Prpf31/Eif1/Rbm39/Rbm22/Lmntd2/Tra2b/Rest/Sf3a1/Dbr1/Exosc10/Bcas2/Rbm4b/Bud13/Snrpe/Nup98/Npm1/BC005624/Snrpd2/Srsf2/Snrpa1/Srsf10/Snrpf/Srrm1/Cwc25/Sf3b6/Acin1/Ddx39b/Rsrc1/Rbm14/Hnrnpk/Hnrnpa3/Wdr77/Rbmx/Upf3a/Htatsf1/Slu7/Rbm7/Mettl3/Prdx6/Isy…	67
GO:0000377	RNA splicing, via transesterification reactions with bulged adenosine as nucleophile	247	0.311198	1.56337	0.000140456	0.00424068	0.003236	2048	tags=27%, list=17%, signal=23%	Ddx5/Upf3b/Eif4a3/Snrpd1/Dcps/Sf3b2/Cirbp/Ppie/Mettl16/Sde2/Hnrnpc/Syf2/Srsf5/Ilf3/Snrpb2/Pqbp1/Scnm1/Smn1/Prmt5/Ncbp2/Snrpert/Lsm3/Sf1/Hspa8/Hnrnpa2b1/Prpf31/Eif1/Rbm39/Rbm22/Lmntd2/Tra2b/Rest/Sf3a1/Dbr1/Exosc10/Bcas2/Rbm4b/Bud13/Snrpe/Nup98/Npm1/BC005624/Snrpd2/Srsf2/Snrpa1/Srsf10/Snrpf/Srrm1/Cwc25/Sf3b6/Acin1/Ddx39b/Rsrc1/Rbm14/Hnrnpk/Hnrnpa3/Wdr77/Rbmx/Upf3a/Htatsf1/Slu7/Rbm7/Mettl3/Prdx6/Isy…	67
GO:0000398	mRNA splicing, via spliceosome	247	0.311198	1.56337	0.000140456	0.00424068	0.003236	2048	tags=27%, list=17%, signal=23%	Ddx5/Upf3b/Eif4a3/Snrpd1/Dcps/Sf3b2/Cirbp/Ppie/Mettl16/Sde2/Hnrnpc/Syf2/Srsf5/Ilf3/Snrpb2/Pqbp1/Scnm1/Smn1/Prmt5/Ncbp2/Snrpert/Lsm3/Sf1/Hspa8/Hnrnpa2b1/Prpf31/Eif1/Rbm39/Rbm22/Lmntd2/Tra2b/Rest/Sf3a1/Dbr1/Exosc10/Bcas2/Rbm4b/Bud13/Snrpe/Nup98/Npm1/BC005624/Snrpd2/Srsf2/Snrpa1/Srsf10/Snrpf/Srrm1/Cwc25/Sf3b6/Acin1/Ddx39b/Rsrc1/Rbm14/Hnrnpk/Hnrnpa3/Wdr77/Rbmx/Upf3a/Htatsf1/Slu7/Rbm7/Mettl3/Prdx6/Isy…	67
GO:0045786	negative regulation of cell cycle	300	0.303493	1.56321	4.12178e-05	0.00178998	0.00136591	2593	tags=33%, list=21%, signal=26%	Nubp1/Cep63/Tnf/Tnfaip3/Zfp36l1/Spdl1/Plaat3/Pinx1/Gmnn/Rad9b/Gpr132/Crlf3/Rbm38/Trp53/Eme1/Sde2/Babam1/Rad51/Ccar2/Syf2/Rpa2/Runx3/Mrnip/Cdk5rap2/Cdkn2b/Spc25/Dtx3l/Ccng1/Plk3/Haspin/Zfp655/Knl1/Trim37/Cdk5rap1/Stil/Ezh2/Spc24/H2-M3/Taf6/Dlg1/Bard1/Brcc3/Nop53/Rpl26/Brca1/Tiprl/Npm1/Lcmt1/Ufl1/E2f1/Tpra1/Aurka/Tmsb4x/Cdkn1b/Lats2/Rbm14/Fzr1/H2ax/Bub1/Ptpn11/Tipin/Cdk5rap3/Cenpe/Birc5/Mbd4/Aurkb/…	98
GO:1903313	positive regulation of mRNA metabolic process	108	0.350199	1.56056	0.00263279	0.0281362	0.0214703	2359	tags=33%, list=19%, signal=27%	Zfp36l1/Upf3b/Eif4a3/Dcps/Cirbp/Zc3h12a/Mettl16/Alkbh5/Csde1/Mlh1/Prmt5/Parn/Hspa8/Mov10/Eif1/Lmntd2/Tra2b/Exosc10/Nup98/Ythdf2/Eif4enif1/Cnot8/Ago3/Elavl1/Wdr77/Rbmx/Dcp1b/Upf3a/Mettl3/Prdx6/Dis3l2/Cnot7/Zc3h12d/Patl1/Ythdf3/Snw1	36
GO:0050777	negative regulation of immune response	128	0.337597	1.55942	0.00254069	0.0276467	0.0210968	1982	tags=30%, list=16%, signal=25%	Mndal/Ifi203/Il4i1/Cep63/Cr2/Tnfaip3/C9orf72/Ifi214/Oas1a/Pglyrp2/Dhx58/Smad7/Zc3h12a/Rps19/Il27ra/Jak3/Cd59a/Atg12/Banf1/Nmi/Ptpn6/Cd69/Oas1c/Samsn1/H2-M3/Parp3/Il10/Lgals9/Pglyrp1/Ythdf2/Ufl1/Pim1/Pdcd1/Ptpn2/Trim27/Aurkb/Eif4e2/Mettl3	38
GO:0045621	positive regulation of lymphocyte differentiation	104	0.351201	1.55642	0.00190893	0.0232034	0.0177062	1377	tags=23%, list=11%, signal=21%	Zap70/Lck/Il4i1/Cd27/Rara/Il2rg/Wnt10b/Tespa1/Carmil2/Cd83/Il15/Cd1d1/Smarce1/Ripk2/Runx3/Runx1/Ccr7/Gimap5/Flt3l/H2-M3/Il10/Il12a/Lgals9/Nfkbiz	24
GO:1903900	regulation of viral life cycle	110	0.344601	1.5523	0.0020504	0.0241846	0.0184549	982	tags=18%, list=8%, signal=17%	Mndal/Ifi203/Tnf/Ddx5/Gbp7/Trim12a/Ifi214/Oas1a/Oasl2/Trim30a/Trim59/Trim6/Trim34a/Ppie/Ccl5/Ilf3/Banf1/Shfl/Rad23a/Oas1c	20
GO:0000725	recombinational repair	165	0.322754	1.54679	0.000564007	0.0103228	0.00787721	4067	tags=57%, list=33%, signal=38%	Vps72/Sfr1/Fbh1/Ing3/Aste1/Mcm4/Fignl1/Rad51/Rpa3/Rpa2/Mrnip/Rnf138/Shld1/Meaf6/Nsmce1/Rad54b/Ep400/Hrob/Ppp4c/Gins2/Senp3/Cdc45/Brca1/Rec8/Rad51d/Rad51b/Mrgbp/Rad51c/Spidr/H2ax/Rmi1/Rad51ap1/Atm/Htatsf1/Rtel1/Shld2/Plk1/Mre11a/Xrcc5/Morf4l1/Klhl15/Zswim7/Mcm8/Mcm3/Rbbp8/Recql4/Nabp2/Epc1/Sem1/Chek1/Hus1/Shld3/Rif1/Rhno1/Mcm2/Rev3l/Mcm5/Rfwd3/Ankle1/Sirt6/Inip/Ercc4/Mcm7/Blm/Rad52/Yeats4/Timeless…	94
GO:0006310	DNA recombination	273	0.304008	1.54674	0.000116964	0.0038801	0.00296085	3232	tags=42%, list=27%, signal=32%	Cd40/Cep63/Vps72/Sfr1/Cenpx/Fbh1/Ing3/Aste1/Ung/Mcm4/Polm/Brip1/Eme1/Polb/Il27ra/Fignl1/Apex1/Cenps/Ino80c/Rad51/Rpa3/Rpa2/Mlh1/Mrnip/Swap70/Rnf138/Shld1/Meaf6/Nsmce1/Rad54b/Ep400/Xrcc4/Nsd2/Lig1/Hrob/Icosl/Rad18/Ezh2/Ppp4c/Parp3/Bard1/Gins2/Senp3/Cdc45/Top2a/Brca1/Nfkbiz/Ccr6/Rec8/Rad51d/Ercc1/Rad51b/Mrgbp/Hmgb2/Psmc3ip/Rad51c/Spidr/Batf/H2ax/Tfpt/Rmi1/Rad51ap1/Atm/Htatsf1/Rtel1/Shld2/Plk1/Fancd…	115
GO:0032479	regulation of type I interferon production	108	0.345842	1.54114	0.00330391	0.0321441	0.0245288	1341	tags=21%, list=11%, signal=19%	Tank/Ikbke/Relb/Arrdc4/Xaf1/G3bp1/Stat1/Rel/Traf3ip3/Gbp7/Oas1a/Sting1/Dhx58/Atg12/Pqbp1/Banf1/Rnf135/Nmi/Gbp4/Oas1c/Ticam2/Irf7/Zcchc3	23
GO:0007088	regulation of mitotic nuclear division	85	0.356597	1.54007	0.00494555	0.0419625	0.032021	3584	tags=46%, list=29%, signal=33%	Tnf/Spdl1/Bora/Cdk5rap2/Nusap1/Anapc11/Fbxw5/Tubg1/Spc25/Haspin/Knl1/Spc24/Lcmt1/Cdca2/Bub1/Cenpe/Birc5/Aurkb/Cdca8/Dusp1/Atm/Zwint/Ska1/Plk1/Nup62/Chek1/Zwilch/Ube2c/Fbxo5/Nuf2/Klhl22/Ccnb1/Ndc80/Cdc23/Esr1/Rcc1/Cdc20/Phip/Bub3	39
GO:0061982	meiosis I cell cycle process	80	0.355762	1.53201	0.00617255	0.0478716	0.0365302	2094	tags=38%, list=17%, signal=31%	Cep63/Sirt7/Cenpx/Brip1/Eme1/Cenps/Rad51/Mlh1/Rad54b/Haspin/Knl1/Top2a/BC005624/Rec8/Rad51d/Aurka/Psmc3ip/Rad51c/Ubb/Cenpe/Birc5/Pkmyt1/Rmi1/Rad51ap1/Atm/Zwint/Ccnb2/Plk1/Fancd2/Mre11a	30
GO:0050684	regulation of mRNA processing	110	0.339807	1.53071	0.00291363	0.0298678	0.0227917	2910	tags=39%, list=24%, signal=30%	Ddx5/Zfp36l1/Upf3b/Eif4a3/Cirbp/Mettl16/Alkbh5/Prmt5/Sf1/Hspa8/Hnrnpa2b1/Eif1/Rbm39/Lmntd2/Tra2b/Rest/Fip1l1/Exosc10/Nup98/Npm1/Srsf2/Srsf10/Srrm1/Acin1/Hnrnpk/Wdr77/Rbmx/Upf3a/Rbm7/Prdx6/Ptbp1/Snw1/Rbm15/Srsf7/Sap18b/Magoh/Jmjd6/Slirp/Larp7/Rbm8a/Smu1/Thrap3/Ptcd2	43
GO:0140053	mitochondrial gene expression	162	0.321254	1.53013	0.00115083	0.0162649	0.0124115	3291	tags=40%, list=27%, signal=29%	Mrpl45/Mrps2/Fastkd2/Mrps6/Mrpl10/Mrpl32/Kansl1/Aurkaip1/Alkbh1/Mrps16/Nsun3/Mrpl38/Mrpl17/Gadd45gip1/Mrpl11/Mrpl58/Cdk5rap1/Mrps31/Mrpl55/Mtif2/Tbrg4/Ears2/Mrpl24/Mettl8/Trmt5/Mrpl15/Mrps26/Mtg1/Mrpl54/Fastk/Mrpl35/Elac2/Coa3/Mrpl19/Mrpl12/Mrpl52/Mtpap/Mrpl40/Mrps28/Mrps34/Mrpl47/Gatb/Mrpl21/Tfam/Mrpl48/Mrpl9/Prorp/Mrpl41/Angel2/Mrps30/Mrps23/Tefm/Supv3l1/Mrpl27/Qrsl1/Mrps15/Dap3/Mrpl33/Mrps7/Mr…	64
GO:0022613	ribonucleoprotein complex biogenesis	419	0.287463	1.52958	1.50054e-05	0.000823918	0.000628721	3340	tags=36%, list=27%, signal=27%	Nmd3/Pop5/Sirt7/Rexo4/Znhit6/Eif4a3/Fdxacb1/Mrps2/Snrpd1/Mphosph10/Rps5/Fastkd2/Dnttip2/Rps9/Bud23/Gnl2/Rps19/Mettl16/Mrpl10/Pno1/Sde2/Ngdn/Exosc2/Eif2d/Zfp593/Eif3f/Noc4l/Mrm3/Rpusd2/Pelp1/C1d/Smn1/Nsun3/Rps27a/Prmt5/Dhx37/Snrpert/Pih1d1/Rpl35/Rbm34/Prpf31/Gtf3a/Rps14/Ddx52/Efl1/Wbp11/Ptges3/Sf3a1/Tsr2/Usp16/Rexo1/Wdr74/Urb1/Exosc10/Nop53/Rpl26/Snrpe/Ltv1/Eif3m/Lsg1/Xpo1/Npm1/Glul/Rrp9/Snrpd2/Yt…	149
GO:0032606	type I interferon production	112	0.339205	1.52854	0.00483364	0.0414547	0.0316335	1341	tags=21%, list=11%, signal=18%	Tank/Ikbke/Relb/Arrdc4/Xaf1/G3bp1/Stat1/Rel/Traf3ip3/Gbp7/Oas1a/Sting1/Dhx58/Atg12/Pqbp1/Banf1/Rnf135/Nmi/Gbp4/Oas1c/Ticam2/Irf7/Zcchc3	23
GO:0051310	metaphase chromosome alignment	93	0.34934	1.52744	0.00598806	0.0473592	0.0361391	3449	tags=44%, list=28%, signal=32%	Spdl1/Pinx1/Cdca5/Chmp2b/Cenpf/Sgo1/Mlh1/Ska2/Kif2c/Spc25/Nudc/Knl1/Spc24/Kif22/Map1s/Dsn1/Spag5/Nsl1/Cenpe/Birc5/Aurkb/Kif18a/Ttl/Cdca8/Becn1/Zwint/Ska1/Snhg15/Cdk1/Nup62/Gem/Knstrn/Nuf2/Hnrnpu/Kat2b/Ccnb1/Ndc80/Cdc23/Ect2/Mapre1/Nek2	41
GO:0002218	activation of innate immune response	232	0.304677	1.5252	0.00034279	0.00737616	0.00562865	1245	tags=21%, list=10%, signal=19%	Mndal/Ifi203/Ikbke/Gbp2/Casp6/Matr3/Tnf/Nfkbia/Cyba/Tnfaip3/Tnip1/Traf3ip3/Ddx60/Gbp7/Trim12a/Ifi214/Oas1a/Trim30a/Rtn4/Sting1/Ifi211/Rela/Dhx58/Ifi35/Rab11fip2/Wdfy1/Gbp3/Arf6/Nfkbil1/Ripk2/Pqbp1/Banf1/Lyplal1/Casp4/Rnf135/Gps2/Mapk8/Csnk1a1/Nmi/Nlrp10/Hspa8/Appl1/Hexim1/Oas1c/Unc93b1/Brcc3/Ticam2/Irf7/Nop53	49
GO:0045582	positive regulation of T cell differentiation	91	0.348412	1.52447	0.00396615	0.0364352	0.0278032	2127	tags=31%, list=17%, signal=26%	Zap70/Lck/Il4i1/Cd27/Rara/Il2rg/Wnt10b/Tespa1/Carmil2/Cd83/Cd1d1/Smarce1/Ripk2/Runx3/Runx1/Ccr7/Gimap5/H2-M3/Il12a/Lgals9/Nfkbiz/H2-DMa/Sash3/Smarca2/Cd74/Smarcb1/Nfkbid/Ambra1	28
GO:0065004	protein-DNA complex assembly	152	0.321618	1.52219	0.00246617	0.0269585	0.0205717	3211	tags=39%, list=26%, signal=29%	Med11/Rbbp4/Med7/Wnt10b/Gmnn/Med31/Cenpx/Med9/Med10/Trp53/Nap1l4/Cenpn/Gtf2a2/Rad51/Dlgap5/Taf7/Taf4b/Rnf4/Oip5/Itgb3bp/Ssrp1/Taf6/Chaf1b/Taf1b/Cdc45/Nfkbiz/Npm1/Taf12/Tspyl2/Cenpt/Rad51c/Gtf2b/Tspyl1/Kat6b/Smarca2/Cenpe/Gtf2f2/Taf13/Smarcb1/Cenpk/Grwd1/Asf1a/Dnajc9/Sugt1/Asf1b/Med29/Mcm2/Nasp/Med28/H1f5/Mis18a/Taf6l/Brd2/Smyd3/Rad52/Cenpi/Hmgb1/Hjurp/H3f3b	59
GO:0045089	positive regulation of innate immune response	278	0.297314	1.51567	0.000149616	0.00435802	0.00332554	1377	tags=21%, list=11%, signal=19%	Mndal/Ifi203/Ikbke/Gbp2/Casp6/Matr3/Tnf/Nfkbia/Cyba/Tnfaip3/Tnip1/Traf3ip3/Ddx60/Gbp7/Trim12a/Ifi214/Oas1a/Trim30a/Rtn4/Sting1/Ifi211/Trim6/Rela/Dhx58/Ifi35/Rab11fip2/Rps19/Wdfy1/Gbp3/Arf6/Nfkbil1/Ripk2/Pqbp1/Banf1/Dpp4/Lyplal1/Casp4/Rnf135/Gps2/Mapk8/Csnk1a1/Gimap5/Nmi/Nlrp10/Fadd/Hspa8/Appl1/Hexim1/Oas1c/H2-M3/Unc93b1/Il12a/Brcc3/Ticam2/Irf7/Nop53/Zcchc3/Lgals9/Nfkbiz	59
GO:2001056	positive regulation of cysteine-type endopeptidase activity	87	0.350661	1.51522	0.00547001	0.0448178	0.0341999	1103	tags=20%, list=9%, signal=18%	Mndal/Ifi203/Lck/Stat1/Tnf/Bid/Ifi214/Tbc1d10a/Bmyc/Hip1r/Pmaip1/Ripk2/Rnf7/Fadd/Laptm5/Rest/Prr7	17
GO:0007059	chromosome segregation	355	0.286754	1.51013	8.07172e-05	0.00302322	0.00230698	2154	tags=27%, list=18%, signal=23%	Smc4/Cep63/Spdl1/Sirt7/Pinx1/Cdca5/Uvrag/Chmp2b/Cenpx/Cenpf/Sgo1/Brip1/Smarce1/Haus5/Cenpn/Cenps/Dlgap5/Mlh1/Tubgcp2/Nup43/Cdk5rap2/Ska2/Nusap1/Rnf4/Anapc11/Oip5/Kif2c/Tubg1/Kif23/Haus3/Spc25/Itgb3bp/Haspin/Nudc/Knl1/Ncaph/Stil/Rad18/Spc24/Bcas2/Top2a/Kif2a/Bcl7a/Kif18b/Csnk1d/Brca1/Dpf2/BC005624/Sgo2a/Lcmt1/Ndel1/Rec8/Esco2/Tacc3/Cdca2/Kif4/Kif22/Map1s/Aurka/Dsn1/Cenpt/Psmc3ip/Kif11/Ncor1/Phf13/…	96
GO:0043122	regulation of canonical NF-kappaB signal transduction	170	0.313058	1.50976	0.00163019	0.0204932	0.0156381	871	tags=18%, list=7%, signal=17%	Tank/Cd40/Ikbke/Lta/Ltb/Stat1/Tnf/Nfkbia/Optn/Tnfaip3/Irak1bp1/Tnip1/Gbp7/Trim12a/Trim30a/Trim59/Trim6/Rela/Traf2/Rbck1/Trim34a/Zc3h12a/Zfand6/Traf4/Nfkbil1/Lurap1/Ripk2/Ikbkg/Traf3ip2/Fadd/Lamtor5	31
GO:1902107	positive regulation of leukocyte differentiation	143	0.320642	1.5004	0.00428064	0.0385092	0.0293858	1377	tags=21%, list=11%, signal=19%	Zap70/Lck/Il4i1/Cd27/Rara/Tnf/Zfp36l1/Il2rg/Wnt10b/Tespa1/Carmil2/Cd83/Il15/Cd1d1/Smarce1/Ccl5/Ripk2/Runx3/Runx1/Csf1/Ccr7/Gimap5/Flt3l/Fadd/H2-M3/Il10/Il12a/Lgals9/Hcls1/Nfkbiz	30
GO:1903708	positive regulation of hemopoiesis	143	0.320642	1.5004	0.00428064	0.0385092	0.0293858	1377	tags=21%, list=11%, signal=19%	Zap70/Lck/Il4i1/Cd27/Rara/Tnf/Zfp36l1/Il2rg/Wnt10b/Tespa1/Carmil2/Cd83/Il15/Cd1d1/Smarce1/Ccl5/Ripk2/Runx3/Runx1/Csf1/Ccr7/Gimap5/Flt3l/Fadd/H2-M3/Il10/Il12a/Lgals9/Hcls1/Nfkbiz	30
GO:0000724	double-strand break repair via homologous recombination	160	0.314426	1.49683	0.00258549	0.0278905	0.0212829	4067	tags=56%, list=33%, signal=38%	Vps72/Sfr1/Fbh1/Ing3/Aste1/Mcm4/Fignl1/Rad51/Rpa3/Rpa2/Mrnip/Rnf138/Shld1/Meaf6/Nsmce1/Rad54b/Ep400/Ppp4c/Gins2/Senp3/Cdc45/Brca1/Rec8/Rad51d/Rad51b/Mrgbp/Rad51c/Spidr/H2ax/Rmi1/Rad51ap1/Atm/Htatsf1/Rtel1/Shld2/Plk1/Mre11a/Morf4l1/Klhl15/Zswim7/Mcm8/Mcm3/Rbbp8/Recql4/Nabp2/Epc1/Sem1/Chek1/Hus1/Shld3/Rif1/Mcm2/Rev3l/Mcm5/Rfwd3/Ankle1/Sirt6/Inip/Ercc4/Mcm7/Blm/Rad52/Yeats4/Timeless/Smc6/Actb/Mcm6/W…	90
GO:0002833	positive regulation of response to biotic stimulus	293	0.291807	1.49548	0.000143554	0.00428598	0.00327058	1377	tags=21%, list=11%, signal=19%	Mndal/Ifi203/Ikbke/Gbp2/Casp6/Matr3/Tnf/Nfkbia/Cyba/Tnfaip3/Tnip1/Traf3ip3/Ddx60/Gbp7/Trim12a/Ifi214/Oas1a/Sash1/Trim30a/Rtn4/Sting1/Ifi211/Trim6/Rela/Dhx58/Ifi35/Rab11fip2/Rps19/Wdfy1/Gbp3/Arf6/Nfkbil1/Ripk2/Pqbp1/Banf1/Dpp4/Lyplal1/Casp4/Rnf135/Gps2/Mapk8/Csnk1a1/Gimap5/Nmi/Nlrp10/Fadd/Hspa8/Appl1/Hexim1/Oas1c/H2-M3/Unc93b1/Il12a/Brcc3/Ticam2/Irf7/Nop53/Mif/Zcchc3/Lgals9/Nfkbiz	61
GO:0072331	signal transduction by p53 class mediator	129	0.323673	1.49321	0.00385483	0.0360362	0.0274988	2365	tags=31%, list=19%, signal=25%	Mndal/Ifi203/Casp6/Fhit/Cep63/Shisa5/Ddx5/Triap1/Mlf1/Ifi214/Rbm38/Trim24/Trp53/Bmyc/Pmaip1/Hexim1/Psmd10/Marchf7/Nop53/Rpl26/Mif/Npm1/Rffl/E2f1/Batf/Hnrnpk/Ubb/Rps15/Cdk5rap3/Atr/Atm/Cops3/Bcl2l12/Mdm4/Cd74/Rps20/Znhit1/Dyrk2/Snw1/Uri1	40
GO:0000956	nuclear-transcribed mRNA catabolic process	106	0.33507	1.49312	0.00626024	0.0482342	0.0368068	3314	tags=38%, list=27%, signal=28%	Ddx5/Zfp36l1/Upf3b/Eif4a3/Smg7/Dcps/Zcchc7/Nbdy/Zc3h12a/Csde1/Exosc2/Mlh1/Parn/Ncbp2/Exosc10/Eif4enif1/Cnot8/Mtpap/Dcp1b/Upf3a/Atm/Dis3l2/Pnrc1/Ptbp1/Cnot7/Patl1/Tob1/Magoh/Mrto4/Exosc7/Rbm8a/Lsm4/Thrap3/Lsm7/Cnot2/Exosc3/Dis3/Hnrnpu/Pan2/Ssb	40
GO:0008380	RNA splicing	384	0.279696	1.48752	7.12862e-05	0.00276857	0.00211266	2096	tags=26%, list=17%, signal=22%	Ddx5/Upf3b/Supt20/Eif4a3/Snrpd1/Dcps/Sf3b2/Clk4/Thoc7/Ppil2/Cirbp/Rbm38/Ccnl1/Ppie/Clasrp/Mettl16/Zmat5/Clk1/Sde2/Hnrnpc/Ccar2/Syf2/Clk3/Srsf5/Ilf3/Snrpb2/Pqbp1/Scnm1/Smn1/Zpr1/Prmt5/Ncbp2/Snrpert/Lsm3/Sf1/Hspa8/Hnrnpa2b1/Prpf31/Thoc5/Eif1/Thoc3/Rbm39/Rbm22/Lmntd2/Tra2b/Wbp11/Ddx1/Rest/Tsen54/Snrnp40/Taf15/Cd2bp2/Sf3a1/Dbr1/Exosc10/Bcas2/Rbm4b/Bud13/Nrde2/Snrpe/Nup98/Npm1/BC005624/Pus1/Snrpd2/Srs…	99
GO:0007249	canonical NF-kappaB signal transduction	192	0.304288	1.4817	0.000868501	0.0132128	0.0100825	871	tags=18%, list=7%, signal=17%	Tank/Cd40/Ikbke/Lta/Relb/Ltb/Stat1/Tnf/Rel/Nfkbia/Optn/Tnfaip3/Irak1bp1/Tnip1/Gbp7/Trim12a/Trim30a/Trim59/Trim6/Nfkb2/Rela/Traf2/Rbck1/Trim34a/Zc3h12a/Zfand6/Traf4/Nfkbil1/Lurap1/Ripk2/Ikbkg/Traf3ip2/Fadd/Lamtor5	34
GO:0002831	regulation of response to biotic stimulus	388	0.274914	1.46682	0.000119902	0.00390785	0.00298203	1872	tags=23%, list=15%, signal=20%	Mndal/Ifi203/Ikbke/Il4i1/Gbp2/Casp6/Matr3/Stat1/Cep63/Tnf/Nfkbia/Cyba/Optn/Tnfaip3/Tnip1/Traf3ip3/Ddx60/Gbp7/Trim12a/Ifi214/Il15/Oas1a/Sash1/Trim30a/Rtn4/Sting1/Ifi211/Trim6/Rela/Dhx58/Ifi35/Rab11fip2/Zc3h12a/Rps19/Ccl5/Wdfy1/Gbp3/Arf6/Nfkbil1/Ripk2/Atg12/Pqbp1/Banf1/Dpp4/Lyplal1/Casp4/Rnf135/Gps2/Mapk8/Csnk1a1/Gimap5/Traf3ip2/Nmi/Nlrp10/Fadd/Ptpn6/Hspa8/Dtx3l/Appl1/Gbp4/Hexim1/Oas1c/H2-M3/Unc93b…	90
GO:0043484	regulation of RNA splicing	152	0.307902	1.45727	0.00546076	0.0448178	0.0341999	3339	tags=43%, list=27%, signal=32%	Ddx5/Upf3b/Supt20/Eif4a3/Clk4/Cirbp/Rbm38/Ccnl1/Mettl16/Clk1/Clk3/Srsf5/Pqbp1/Smn1/Zpr1/Prmt5/Sf1/Hspa8/Hnrnpa2b1/Eif1/Rbm39/Rbm22/Lmntd2/Tra2b/Rest/Exosc10/Nup98/Npm1/Srsf2/Srsf10/Taf12/Srrm1/Acin1/Fastk/Fam50a/Hnrnpk/Wdr77/Rbmx/Upf3a/Rbm7/Prdx6/Ptbp1/Usp22/Sgf29/Snw1/Rbm15/Srsf7/Sap18b/Magoh/Jmjd6/Slirp/Larp7/Rbm8a/Smu1/Thrap3/Taf6l/Tada3/Ythdc1/Rps26/Hnrnph3/Hnrnpu/Kat2b/Hnrnpf/Son/Taf5l/Habp4	66
GO:0045619	regulation of lymphocyte differentiation	163	0.303941	1.45675	0.00202987	0.0241211	0.0184065	2136	tags=29%, list=18%, signal=24%	Zap70/Lck/Il4i1/Cd27/Rara/Zfp36l1/Il2rg/Wnt10b/Tespa1/Carmil2/Cd83/Il15/Pglyrp2/Sh3rf1/Cd1d1/Smad7/H2-Oa/Smarce1/Zc3h12a/Jak3/Ripk2/Runx3/Runx1/Ccr7/Gimap5/Flt3l/Ptpn6/Cd69/H2-M3/Il10/Il12a/Lgals9/Nfkbiz/Pglyrp1/H2-DMa/Sash3/Smarca2/Tmem131l/Ptpn2/Mettl3/Cd74/Smarcb1/Flt3/Fancd2/Nfkbid/Ambra1/Zeb1	47
GO:0002253	activation of immune response	366	0.273753	1.4436	0.000310295	0.00695731	0.00530903	1245	tags=20%, list=10%, signal=18%	Mndal/Zap70/Ifi203/Ikbke/Lck/Gbp2/Casp6/Matr3/Cfp/Tnf/Cr2/Nfkbia/Cyba/Tnfaip3/Rapgef1/Tnip1/Fcrl5/Traf3ip3/Ddx60/Gbp7/Trim12a/Tespa1/Carmil2/Ifi214/Oas1a/Trim30a/Rtn4/Sting1/Ifi211/Rela/Klhl6/Dhx58/Ifi35/Rbck1/Ighg2b/Rab11fip2/Zc3h12a/Wdfy1/Gbp3/Arf6/Nfkbil1/Blnk/Ripk2/Blk/Cd59a/Pqbp1/Banf1/Lyplal1/Casp4/Ikbkg/Rnf135/Gps2/Mapk8/Ccr7/Csnk1a1/Nmi/Nlrp10/Ptpn6/Hspa8/Appl1/Fyn/Hexim1/Oas1c/Eif2b2/Cd1…	72
GO:0002822	regulation of adaptive immune response based on somatic recombination of immune receptors built from immunoglobulin superfamily domains	141	0.308077	1.43797	0.00577252	0.0462673	0.0353059	1784	tags=28%, list=15%, signal=24%	Cd40/Lta/Il4i1/Fcer2a/Tnf/Cr2/Tnfaip3/Traf2/Cd1d1/Smad7/Ighg2b/Zc3h12a/Il27ra/Jak3/H2-Q6/Mlh1/B2m/Ripk2/Dpp4/Slc11a1/Ccr7/Gimap5/Nlrp10/Shld1/Fadd/Ptpn6/Hspa8/Cd69/Nsd2/H2-M3/Parp3/Il12a/Nfkbiz/Ufl1/H2-Q7/H2-Q4/H2-DMa/Sash3/H2-T10/Pdcd1	40
GO:1901990	regulation of mitotic cell cycle phase transition	282	0.280607	1.43452	0.000833045	0.0130863	0.00998598	3207	tags=38%, list=26%, signal=29%	Zfp36l1/Spdl1/Bid/Wnt10b/Pinx1/Cdca5/Gpr132/Psme2/Cenpf/Crlf3/Rbm38/Trp53/Psme1/Smarce1/Apex1/Sde2/Babam1/Syf2/Rpa2/Mrnip/Cdk5rap2/Mnat1/Anapc11/Cdkn2b/Ptpn6/Spc25/Appl1/Ccng1/Rpl17/Plk3/Haspin/Zfp655/Knl1/Stil/Ezh2/Spc24/Dlg1/Bard1/Brcc3/Senp2/Nop53/Rpl26/Bcl7a/Brca1/Dpf2/Lcmt1/E2f1/Cpsf3/Tpra1/Rad51b/Rad51c/Cdkn1b/Fzr1/Bub1/Smarca2/Cdk5rap3/Cenpe/Birc5/Mbd4/Aurkb/Atr/Pkmyt1/Cdc6/Rrm1/Cdca8/Dusp…	107
GO:0042770	signal transduction in response to DNA damage	161	0.298878	1.42906	0.00396418	0.0364352	0.0278032	2637	tags=36%, list=22%, signal=29%	Cep63/Ddx5/Triap1/Bid/Rad9b/Rbm38/Trp53/Eme1/Sde2/Babam1/Rad51/Ccar2/Pmaip1/Syf2/Rpa2/Mrnip/Dtx3l/Ccng1/Psmd10/Marchf7/Bard1/Brcc3/Nop53/Rpl26/Mif/Brca1/Gadd45a/Tiprl/Npm1/Ufl1/E2f1/Batf/Fzr1/H2ax/Ptpn11/Tipin/Cdk5rap3/Mbd4/Atr/Atm/Cops3/Dtl/Mdm4/Cd74/Plk1/Fancd2/Mre11a/Gnb1l/Znhit1/Babam2/Dot1l/Cdk1/Chek1/Grb2/Hus1/Rhno1/Foxm1/Parp9	58
GO:0007346	regulation of mitotic cell cycle	382	0.2681	1.42257	0.000493582	0.00928284	0.00708361	2524	tags=30%, list=21%, signal=25%	Tnf/Zfp36l1/Spdl1/Bid/Wnt10b/Pinx1/Cdca5/Gmnn/Rad9b/Gpr132/Psme2/Cenpf/Crlf3/Rbm38/Trp53/Psme1/Smarce1/Eme1/Apex1/Sde2/Babam1/Dynlt3/Dlgap5/Rpa3/Syf2/Rpa2/Mrnip/Bora/Cdk5rap2/Nusap1/Mnat1/Anapc11/Fbxw5/Cdkn2b/Ptpn6/Tubg1/Spc25/Appl1/Ccng1/Rpl17/Plk3/Haspin/Zfp655/Knl1/Sra1/Stil/Ezh2/Spc24/Dlg1/Bard1/Brcc3/Senp2/Nop53/Rpl26/Bcl7a/Cdk10/Brca1/Dpf2/Lcmt1/Pafah1b1/E2f1/Cpsf3/Cdca2/Pim1/Tpra1/Rad51b/A…	116
GO:0006397	mRNA processing	422	0.264521	1.41305	0.00037067	0.00773353	0.00590135	2096	tags=25%, list=17%, signal=21%	Ddx5/Zfp36l1/Upf3b/Eif4a3/Snrpd1/Dcps/Sf3b2/Thoc7/Ppil2/Cirbp/Rbm38/Ppie/Clasrp/Mettl16/Alkbh5/Zmat5/Sde2/Trmt2a/Hnrnpc/Ccar2/Syf2/Srsf5/Ilf3/Snrpb2/Rpusd2/Pqbp1/Scnm1/Smn1/Zpr1/Prmt5/Ncbp2/Snrpert/Cstf1/Lsm3/Sf1/Hspa8/Hnrnpa2b1/Cpsf6/Prpf31/Thoc5/Eif1/Thoc3/Rbm39/Rbm22/Lmntd2/Tra2b/Wbp11/Ddx1/Pcf11/Rest/Tsen54/Snrnp40/Cd2bp2/Sf3a1/Fip1l1/Dbr1/Exosc10/Bcas2/Rbm4b/Bud13/Nrde2/Snrpe/Nup98/Tbrg4/Npm…	104
GO:0051052	regulation of DNA metabolic process	400	0.265652	1.41051	0.000272307	0.00645162	0.00492314	3248	tags=38%, list=27%, signal=29%	Cd40/Tnf/Vps72/Nfatc1/Nudt16l1/Supt20/Sirt7/Pinx1/Pfn1/Gmnn/Fbh1/Ing3/Trp53/Gnl3/Smarce1/Ilkap/Il27ra/Fignl1/Polg2/Acd/Dscc1/Babam1/Id3/Bmyc/Ing5/Ino80c/Rad51/Hnrnpc/Rpa2/Mlh1/Ciz1/Rfc5/Mrnip/Esco1/Taf7/Ino80e/Cct4/Mapk8/Jade2/Parn/Lpin1/Atg7/Shld1/Meaf6/Hnrnpa2b1/Cct3/Ep400/Xrcc4/Nsd2/Rad18/Kat7/Ppp4c/Parp3/Ptges3/Gch1/Taf6/Bard1/Brcc3/Exosc10/Senp3/Senp2/Rfc3/Bcl7a/Brca1/Cct7/Dpf2/Stn1/Npm1/Taf…	154
GO:0031349	positive regulation of defense response	337	0.26884	1.40521	0.000806281	0.0129265	0.00986405	1245	tags=19%, list=10%, signal=17%	Mndal/Ifi203/Ikbke/Lta/Gbp2/Casp6/Matr3/Tnf/Nfkbia/Cyba/Optn/Tnfaip3/Tnip1/Traf3ip3/Ddx60/Gbp7/Trim12a/Ifi214/Oas1a/Trim30a/Rtn4/Sting1/Ifi211/Trim6/Rela/Dhx58/Ifi35/Ighg2b/Rab11fip2/Rps19/Ccl5/Wdfy1/Gbp3/Arf6/Nfkbil1/Pdcd4/Ripk2/Pqbp1/Banf1/Dpp4/Lyplal1/Casp4/Rnf135/Gps2/Mapk8/Ccr7/Csnk1a1/Gimap5/Nmi/Nlrp10/Fadd/Hspa8/Appl1/Hexim1/Oas1c/H2-M3/Unc93b1/Map3k8/Il12a/Brcc3/Ticam2/Irf7/Nop53	63
GO:0006364	rRNA processing	207	0.282417	1.40175	0.00375881	0.0354159	0.0270254	1940	tags=23%, list=16%, signal=19%	Pop5/Sirt7/Rexo4/Znhit6/Eif4a3/Fdxacb1/Mphosph10/Bud23/Rps19/Mettl16/Sde2/Ngdn/Exosc2/Mrm3/Rpusd2/Pelp1/C1d/Nsun3/Dhx37/Pih1d1/Rpl35/Rbm34/Rps14/Ddx52/Wbp11/Tsr2/Rexo1/Wdr74/Urb1/Exosc10/Nop53/Rpl26/Npm1/Rrp9/Ythdf2/Rps27rt/Gtpbp4/Rps27/Wdr36/Abt1/Trmt2b/Znhit3/Rps15/Rpusd1/Pop4/Utp18/Utp15	47
GO:0045088	regulation of innate immune response	327	0.269833	1.40073	0.00108815	0.0155631	0.011876	1872	tags=23%, list=15%, signal=20%	Mndal/Ifi203/Ikbke/Gbp2/Casp6/Matr3/Cep63/Tnf/Nfkbia/Cyba/Tnfaip3/Tnip1/Traf3ip3/Ddx60/Gbp7/Trim12a/Ifi214/Oas1a/Trim30a/Rtn4/Sting1/Ifi211/Trim6/Rela/Dhx58/Ifi35/Rab11fip2/Rps19/Wdfy1/Gbp3/Arf6/Nfkbil1/Ripk2/Atg12/Pqbp1/Banf1/Dpp4/Lyplal1/Casp4/Rnf135/Gps2/Mapk8/Csnk1a1/Gimap5/Nmi/Nlrp10/Fadd/Ptpn6/Hspa8/Appl1/Hexim1/Oas1c/H2-M3/Unc93b1/Il12a/Brcc3/Ticam2/Irf7/Nop53/Zcchc3/Lgals9/Nfkbiz/Myo1f/Yt…	76
GO:0098813	nuclear chromosome segregation	259	0.275768	1.39528	0.00365357	0.0349062	0.0266365	2154	tags=27%, list=18%, signal=23%	Smc4/Cep63/Spdl1/Sirt7/Pinx1/Cdca5/Chmp2b/Cenpf/Sgo1/Brip1/Smarce1/Mlh1/Cdk5rap2/Ska2/Nusap1/Anapc11/Kif2c/Tubg1/Kif23/Spc25/Haspin/Nudc/Knl1/Ncaph/Spc24/Top2a/Kif2a/Bcl7a/Kif18b/Dpf2/BC005624/Lcmt1/Rec8/Tacc3/Kif4/Kif22/Map1s/Aurka/Dsn1/Psmc3ip/Kif11/Phf13/Actr3/Spag5/Bub1/Nsl1/Smarca2/Cenpe/Birc5/Aurkb/Kif18a/Cdc6/Ttl/Arhgef10/Cdca8/Dusp1/Atm/Cdc27/Becn1/Dis3l2/Zwint/Smarcb1/Ccnb2/Ska1/Plk1/Fan…	71
GO:1901987	regulation of cell cycle phase transition	359	0.263369	1.38544	0.000846499	0.013129	0.0100185	3207	tags=38%, list=26%, signal=29%	Cep63/Zfp36l1/Spdl1/Mlf1/Bid/Wnt10b/Pinx1/Cdca5/Rad9b/Gpr132/Psme2/Cenpf/Crlf3/Cirbp/Rbm38/Trp53/Psme1/Smarce1/Eme1/Apex1/Sde2/Babam1/Rad51/Ccar2/Syf2/Rpa2/Mrnip/Cdk5rap2/Mnat1/Anapc11/Cdkn2b/Ptpn6/Spc25/Dtx3l/Appl1/Ccng1/Rpl17/Plk3/Haspin/Zfp655/Knl1/Stil/Ezh2/Spc24/Dlg1/Bard1/Brcc3/Senp2/Nop53/Rpl26/Bcl7a/Cdk10/Brca1/Tiprl/Dpf2/Npm1/Lcmt1/Ufl1/E2f1/Cpsf3/Tpra1/Rad51b/Aurka/Paf1/Tmsb4x/Rad51c/Cd…	135
GO:0002252	immune effector process	425	0.254099	1.35772	0.00160459	0.0203761	0.0155487	1491	tags=21%, list=12%, signal=19%	Ighv13-2/Cd40/Lta/Relb/Il4i1/Lyst/Fcer2a/Ighv1-9/Cd27/Iglc1/Rara/Cfp/Stat4/Tnf/Cr2/Cdh17/Hcst/Tnfaip3/Ighv1-12/Il21r/Ddx60/Rtn4/Iglc2/Trim6/Ung/Pglyrp2/Dhx58/Traf2/Cd1d1/Smad7/Ifi35/Trp53/Ighg2b/Zc3h12a/Ighv1-75/Rps19/Il27ra/Lcp1/Cuedc2/Ctsg/Ighv7-3/Dnajb9/Mpo/Jak3/H2-Q6/Mlh1/B2m/Ripk2/Cd59a/Dock10/Dpp4/Casp4/Swap70/Prg2/Slc11a1/Ccr7/Gimap5/Traf3ip2/Nmi/Shld1/Fadd/Ptpn6/Hspa8/Appl1/Cd69/Cd19/Ighd…	90
GO:0019058	viral life cycle	192	0.278636	1.35679	0.00533883	0.044277	0.0337872	1036	tags=16%, list=9%, signal=15%	Mndal/Ifi203/Nedd4/Tnf/Ddx5/Gbp7/Trim12a/Ifi214/Oas1a/Oasl2/Trim30a/Trim59/Uvrag/Chmp2b/Trim6/Atg16l2/Trim34a/Zc3h12a/Ppie/Usp6nl/Ccl5/Ilf3/Banf1/Dpp4/Shfl/Atg7/Hspa8/Rad23a/Oas1c/Pikfyve	30
GO:1903311	regulation of mRNA metabolic process	232	0.270571	1.35447	0.00607239	0.0474759	0.0362282	2598	tags=31%, list=21%, signal=25%	Ikbke/Ddx5/Zfp36l1/Upf3b/Eif4a3/Dcps/Fastkd2/Traf2/Cirbp/Rbm38/Zc3h12a/Mettl16/Apex1/Alkbh5/Csde1/Hnrnpc/Mlh1/Slc11a1/Prmt5/Parn/Traf3ip2/Sf1/Hspa8/Hnrnpa2b1/Mov10/Eif1/Rbm39/Lmntd2/Tra2b/Rest/Taf15/Fip1l1/Exosc10/Nrde2/Nup98/Tbrg4/Npm1/Srsf2/Ythdf2/Srsf10/Srrm1/Acin1/E2f1/Eif4enif1/Fastk/Cnot8/Ago3/Hnrnpk/Elavl1/Wdr77/Rbmx/Dcp1b/Upf3a/Rbm7/Mettl3/Prdx6/Dis3l2/Ptbp1/Cnot7/Zc3h14/Zc3h12d/Patl1/Yth…	72
GO:0032103	positive regulation of response to external stimulus	391	0.254187	1.35254	0.00142786	0.0190528	0.0145389	1473	tags=20%, list=12%, signal=18%	Mndal/Ifi203/Ikbke/Lta/Gbp2/Casp6/Matr3/Tnf/Sell/Nfkbia/Cyba/Optn/Tnfaip3/Tnip1/Traf3ip3/Ddx60/Gbp7/Trim12a/Ifi214/Oas1a/Sash1/Trim30a/Rtn4/Sting1/Ifi211/Trim6/Rela/Dhx58/Ifi35/Ighg2b/Rab11fip2/Rps19/Ccl5/Wdfy1/Gbp3/Arf6/Nfkbil1/Pdcd4/Ripk2/Pqbp1/Banf1/Dpp4/Lyplal1/Casp4/Swap70/Cxcl10/Rnf135/Gps2/Csf1/Mapk8/Ccr7/Csnk1a1/Gimap5/Nmi/Nlrp10/Fadd/Zfp580/Hspa8/Appl1/Hexim1/Oas1c/H2-M3/Unc93b1/Map3k8/I…	77
GO:0019221	cytokine-mediated signaling pathway	271	0.263494	1.34267	0.00561232	0.0455179	0.0347341	1456	tags=20%, list=12%, signal=18%	Tank/Cd40/Ikbke/Stat4/Stat1/Tnf/Nfkbia/Il21r/Ackr3/Il2rg/Ugcg/Vrk2/Il15/Oas1a/Oasl2/Sting1/Trim6/Rela/Traf2/Rbck1/Trp53/Eed/Il27ra/Ccl5/Ifngr2/Jak3/Ripk2/Casp4/Ikbkg/Cxcl10/Gps2/Csf1/Ccr7/Il3ra/Traf3ip2/Fadd/Ptpn6/Appl1/Tjp2/Oas1c/Laptm5/Nup85/Il10/Tollip/Il12a/Ticam2/Irf7/Hcls1/Nfkbiz/Traf1/Rffl/Pafah1b1/Ccr6/Ythdf2	54
GO:0001817	regulation of cytokine production	477	0.250068	1.33826	0.00122465	0.0168107	0.012828	1202	tags=17%, list=10%, signal=16%	Mndal/Tank/Cd40/Ifi203/Ikbke/Lta/Relb/Ltb/Arrdc4/Cd27/Xaf1/Rara/G3bp1/Stat1/Tnf/Rel/Cybb/Cyba/Optn/Tnfaip3/Traf3ip3/Gbp7/Carmil2/Ifi214/Cd83/Il15/Oas1a/Trim30a/Rtn4/Sting1/Trim6/Rela/Pglyrp2/Dhx58/Traf2/Cd1d1/Smad7/Zc3h12a/Il27ra/Cuedc2/Ccl5/Nfkbil1/Pdcd4/Jak3/Lurap1/B2m/Ripk2/Cd59a/Atg12/Pqbp1/Banf1/Casp4/Prg2/Rnf135/Runx1/Slc11a1/Ccr7/Gimap5/Nmi/Nlrp10/Fadd/Ptpn6/Lamtor5/Chid1/Zfp580/Extl3/Appl…	79
GO:0044770	cell cycle phase transition	436	0.241581	1.29266	0.00259898	0.0279625	0.0213378	3207	tags=36%, list=26%, signal=27%	Cep63/Zfp36l1/Spdl1/Nfatc1/Mlf1/Bid/Wnt10b/Pinx1/Cdca5/Rad9b/Gpr132/Psme2/Cenpf/Crlf3/Cirbp/Rbm38/Trp53/Psme1/Smarce1/Eme1/Apex1/Sde2/Babam1/Bmyc/Rad51/Ccar2/Syf2/Rpa2/Mrnip/Cdk5rap2/Mnat1/Anapc11/Cdkn2b/Ptpn6/Hspa8/Spc25/Dtx3l/Ube2l3/Appl1/Ccng1/Rpl17/Plk3/Pole/Haspin/Zfp655/Knl1/Tcf19/Stil/Ezh2/Spc24/Dlg1/Bard1/Brcc3/Senp2/Nop53/Rpl26/Bcl7a/Cdk10/Brca1/Tiprl/Dpf2/Npm1/Lcmt1/Ufl1/E2f1/Cpsf3/Tacc…	155
GO:0007417	central nervous system development	469	-0.281457	-1.38032	0.00204868	0.0241846	0.0184549	2062	tags=24%, list=17%, signal=21%	Gas8/B4galt5/Atat1/Bag6/Itgam/Foxr1/Ncstn/Nme7/Itgb1/Sirt2/Gak/Nipbl/Top2b/Cep120/Actl6a/Abca2/Rtn3/Abl2/Mtor/Tenm4/Fkrp/Glud1/Gba2/Cln8/Samd4b/Tacc1/Ldb1/Apaf1/Kdm4b/Cic/Cnp/Lig4/Cited2/Mapk3/Ighmbp2/Tnfrsf1b/Ptpra/Mpst/Ndst1/Cited1/Ufm1/Ctnnb1/Fabp7/Rere/Neurod4/Il6st/Sptbn1/Med12/Hnrnpd/Robo1/Enpp1/Tyrobp/Cln5/Lsr/Lmo4/Ufc1/B3gnt5/Xrcc1/Smarca4/Tpp1/Wdr37/Nf1/Coro1c/Atf5/Sema7a/Ddit4/Sox5/Psap…	114
GO:0060322	head development	372	-0.291946	-1.40664	0.00188399	0.0229587	0.0175195	2270	tags=26%, list=19%, signal=22%	Git1/Bmpr1a/Scyl2/Mrtfb/Pcnt/Vps13b/Braf/Gas8/Atat1/Bag6/Itgam/Foxr1/Ncstn/Nme7/Itgb1/Map2k2/Gak/Nipbl/Top2b/Itga4/Cep120/Rtn3/Abl2/Fkrp/Glud1/Samd4b/Ddx10/Tacc1/Ldb1/Apaf1/Kdm4b/Ankrd11/Cic/Plekha1/Cnp/Mapk3/Ndst1/Cited1/Ufm1/Ctnnb1/Fabp7/Rere/Hnrnpd/Robo1/Tyrobp/Cln5/Arsb/Ufc1/Xrcc1/Smarca4/Wdr37/Nf1/Coro1c/Atf5/Sema7a/Ddit4/Psap/Nr2c2/Sgpl1/Slc4a7/Dvl3/Uba6/Ppt1/Jhy/Axl/Pten/Vps51/Ccdc134/Aplp…	98
GO:0030099	myeloid cell differentiation	313	-0.296745	-1.40713	0.00420168	0.0380141	0.029008	2275	tags=27%, list=19%, signal=22%	Rb1/Fosl2/Apc/Selenow/Ostm1/Jagn1/Pirb/Cebpb/Wasf2/Sfxn1/Itgam/Cbfa2t3/Hspa1b/Stat5b/Tcirg1/Brd1/Batf3/G6pdx/Mtor/Fes/Zbtb7a/Hmga1/Ldb1/Nme2/Vps33b/Kmt2e/Sp3/Cited2/Arid4a/Nemp1/Ltf/Myh9/Cul4a/Ucp2/Fstl3/Ctnnb1/Ndfip1/Sp1/Pml/Enpp1/Tyrobp/Fli1/Smarca4/Nf1/Maea/Slc1a5/Ptk2b/Ccr1/Hba-a1/L3mbtl3/Tpm4/Klf13/Cebpg/Tcf3/Fech/Abcb10/Ets1/Pknox1/Flna/Zfp385a/Gnas/Rac1/Tmod3/Eif2ak1/Rarg/Sbno2/Mef2c/Ep300…	84
GO:0048872	homeostasis of number of cells	272	-0.301472	-1.41188	0.00570613	0.0459665	0.0350764	2275	tags=26%, list=19%, signal=22%	Rb1/Fosl2/Selenow/Prdx1/Pirb/Sfxn1/Itgam/Ncstn/Wdr48/Hspa1b/Stat5b/Tcirg1/Brd1/Il2ra/G6pdx/Zbtb7a/Hmga1/Ldb1/Kmt2e/Sp3/Ccr2/Cited2/Slc39a3/Arid4a/Nemp1/Prdx2/Bcl2l11/Sp1/Gpam/Enpp1/P2rx7/Tnfrsf17/Smarca4/Card11/Wdr37/Nf1/Pkn1/Maea/Slc1a5/Asxl1/Hba-a1/L3mbtl3/Klf13/Ada/Cebpg/Cd44/Zfp251/Tcf3/Axl/Lpcat3/Fech/Abcb10/Ets1/Pknox1/Rac1/Tmod3/Mef2c/Lipa/Slc11a2/Fstl1/Mapk14/Acvr1b/Add1/Ehbp1l1/Tnfrsf13c…	71
GO:0098609	cell-cell adhesion	409	-0.291978	-1.41301	0.00237801	0.0264796	0.0202062	2191	tags=28%, list=18%, signal=23%	Wnk1/Hspb1/Sirpa/Cebpb/Pik3r6/Fndc3a/Rgcc/Itgam/Golph3/Tnfaip8l2/Itgb1/Stat5b/Tsc2/Itga4/Anxa9/Actl6a/Irak1/Cldn10/Il2ra/Abl2/Tenm4/Socs5/Atp2c1/Vps33b/Ccr2/Ptpn22/Cited2/Vav1/Bmp6/Tbx21/Pear1/Myh9/Prdx2/Rasgrp1/Fstl3/Ctnnb1/Cd9/Slamf1/Bhlha15/Ndfip1/Sfn/Gpam/Plaur/Plek/Il6st/Arid2/Rap2b/Robo1/Lrg1/Flot2/Smarca4/Il4ra/Card11/Entpd1/Zbtb7b/St3gal4/Dennd6a/Cd2/Spn/Efr3a/Itgb2/Ada/Cd44/Dusp22/F11r/M…	113
GO:0098771	inorganic ion homeostasis	243	-0.307296	-1.41891	0.00526454	0.0438895	0.0334915	2662	tags=33%, list=22%, signal=26%	Afg3l2/Itgav/Slc30a5/Cul5/Pacs2/Xpr1/Atp2a3/Diaph1/Atp1a1/Tfrc/Alpl/Pdzd8/Prnp/Prkcb/Slc39a4/Wnk1/Ftl1/Ank/Lcn2/Slc39a13/Iscu/Slc39a10/Tcirg1/Picalm/Btbd9/Mllt6/Atp2c1/Slc12a9/Ccr2/Tmem165/Bmp6/Ryr1/Smad4/Mcur1/Slc8b1/Ndfip1/Mcub/Slc34a1/Pml/Ankrd9/Fkbp1a/Enpp1/P2rx7/Slc39a9/Osbpl2/Itpr3/Smdt1/Tmco1/Myo5a/Pdpk1/Atp2a2/Ptk2b/Tmem38a/Ccr1/Plcg1/Selenon/Aplp2/Fech/Sco2/Fth1/Slc30a7/Flna/Atp6v0a2/Eif…	80
GO:0070848	response to growth factor	357	-0.298464	-1.42962	0.00234008	0.0263645	0.0201184	2311	tags=26%, list=19%, signal=22%	Dync1li2/Nfkb1/Prkcb/Git1/Kif16b/Bmpr1a/Mapkapk2/Hspb1/Gclm/Braf/Dnm2/Lgmn/Micall1/Itgb1/Ier2/Twf2/Stat5b/Acap2/Tnrc6c/Smurf2/Lemd2/Zbtb7a/Mdm2/Apaf1/Cited2/Mapk3/Arid4a/Bmp6/Tnfrsf1b/Ndst1/Fstl3/Tcf4/Lmtk2/Cited1/Ryr1/Ctnnb1/Smad4/Cfl1/Gclc/Lemd3/Glg1/Pml/Cat/Fkbp1a/Robo1/Enpp1/Usp15/Sh3glb1/Gpr155/Lrg1/Tab1/Runx2/Smpd3/Vegfb/Ogt/Pdpk1/Iqgap1/Ddit4/Sox5/Ptpn12/Slc4a7/Acvrl1/Rab35/Plcg1/Selenon/C…	94
GO:0048589	developmental growth	413	-0.296185	-1.43313	0.00118778	0.0164876	0.0125815	2740	tags=30%, list=23%, signal=24%	Hopx/Mfsd8/Dvl1/Afg3l2/Ptprs/Coa5/Tsc22d4/Mapk1/Etnk2/Raph1/Ctr9/Col14a1/Gpx1/Sbds/Thbs3/Cd2ap/Rasal1/Wdtc1/Gh/Lrp6/Xpa/Fosl2/Limk1/Gsk3a/Bmpr1a/Apc/Sik3/Pcnt/Vps13b/Taf10/Spg11/Dnm2/Lgmn/Wdr48/Itgb1/Twf2/Stat5b/Nedd4l/Kmt2d/Nipbl/Itga4/Pum2/Ints1/Picalm/Arih2/Abl2/G6pdx/Mtor/Tenm4/Fkrp/Fes/Hmga1/Ankrd11/Plekha1/Mex3c/Cited2/Dcaf13/Golga4/Ctdp1/Por/Clic4/Ctnnb1/Bcl2l11/Cd9/Smad4/Cfl1/Acacb/Mcub/S…	125
GO:0003013	circulatory system process	207	-0.31933	-1.44174	0.00567085	0.0459147	0.0350369	1730	tags=25%, list=14%, signal=22%	G6pdx/Mtor/Arhgef12/Akap9/Mdm2/S100a1/Snx5/Bmp6/Ece1/Faah/P2rx4/Gclc/Pla2g6/Trpm4/Akap12/Fli1/Gna11/Smpd3/Vegfb/Ehd3/Kcnn4/Atp2a2/Slc1a5/Coro2b/Tmem38a/Lnpep/Acvrl1/Add3/Ada/Nup155/F11r/Plekha7/Emilin2/Dusp5/Tnni2/Tpm1/Mgll/Ptp4a3/Flna/Gnas/Rac1/Adora2a/Rock2/Ceacam1/Jup/Atp2b1/Cd36/Gpd1l/Zeb2/Camk2n1/Akt1/Plec	52
GO:0051493	regulation of cytoskeleton organization	327	-0.303795	-1.44741	0.00262752	0.0281362	0.0214703	2435	tags=29%, list=20%, signal=24%	Cd2ap/Washc2/Diaph1/Mapre2/Pde4dip/Eml4/Slain2/Rhoc/Vps4b/Git1/Limk1/Gsk3a/Apc/Baiap2l1/Stau2/Mlst8/Atxn7/Braf/Wasf2/Rgcc/Atat1/Arap2/Cdc42ep4/Nme7/Hspa1b/Twf2/Rhog/Mapre3/Cep120/Chmp3/Naa20/Mtor/Akap9/Gba2/Snx9/Fes/Ccdc88c/Avil/Mapk3/Washc5/Rhof/Myh9/Arpc5/Smad4/Cfl1/Capzb/Plek/Svil/Sptbn1/Hck/Eml3/P2rx7/Prex1/Cltc/Ssh1/Clip1/Mark2/Gas2l1/Clasp1/Coro2b/Ptk2b/Spast/Ccdc88a/Add3/Dynlt1a/Camsap2/F1…	94
GO:1901137	carbohydrate derivative biosynthetic process	390	-0.299926	-1.44903	0.000850457	0.0131477	0.0100328	2075	tags=24%, list=17%, signal=21%	Pigb/Pigc/Pgm2/B4galt5/Golph3/Alg12/Ncstn/Nme7/Cmpk2/Dpy19l1/Alg5/Pigh/Gnpda1/Gpaa1/Adcy7/Ostc/Abca2/Galnt6/Tet3/Fuom/G6pdx/Fkrp/Mlec/Ppat/Ndufs5/Pyurf/Golga2/Nme2/Hs6st1/Ndufa6/Uxs1/Alg6/Tmem165/Sccpdh/Cmas/Srd5a3/Ndst1/Alg1/Ctnnb1/Slc35a1/Hexa/Uck2/Krtcap2/Gne/Derl3/Lcmt2/Ccnd3/Smpd3/Hs2st1/Cltc/Rpn1/B3gnt5/Vegfb/Ogt/Magt1/Man1b1/Tyw3/Slc35c2/Edem3/Entpd1/Alg10b/Mgat2/St6galnac6/St3gal4/St3gal1…	95
GO:0008015	blood circulation	192	-0.32157	-1.45237	0.00568909	0.0459665	0.0350764	1730	tags=41%, list=14%, signal=36%	Plcb3/Cd38/Ext2/Pik3ca/Capn1/Prkca/Ndst2/Mef2a/Rhoa/Tbxa2r/Pebp1/Manf/Rangrf/Hopx/Ptprj/Srebf1/Grk2/Cacna1h/Gpx1/Cacna1e/Atp1a1/Map2k3/Ncf2/Kcnk6/Gsk3a/Wnk1/Gclm/Itgb1/Nedd4l/Itga4/G6pdx/Mtor/Arhgef12/Akap9/Mdm2/S100a1/Snx5/Bmp6/Ece1/Faah/P2rx4/Gclc/Pla2g6/Trpm4/Akap12/Fli1/Gna11/Smpd3/Vegfb/Ehd3/Kcnn4/Atp2a2/Coro2b/Tmem38a/Lnpep/Acvrl1/Add3/Ada/Nup155/F11r/Plekha7/Emilin2/Dusp5/Tnni2/Tpm1/Mgll/P…	79
GO:0043434	response to peptide hormone	281	-0.309541	-1.45419	0.00298426	0.0303315	0.0231455	3281	tags=37%, list=27%, signal=28%	Rps6kb2/Pik3ca/Capn1/Prkca/Sos2/Raf1/Btg2/Prkcz/Marcks/Scap/Cpeb2/Uso1/Hhex/Lpin2/Sos1/Xbp1/Hdac9/Blvrb/Sik2/Pnpt1/Prkaa1/Cyp11a1/Lonp1/Ptprj/Chuk/Srebf1/Mapk1/Grk2/Cd2ap/Alpl/Wdtc1/Gh/Nfkb1/Prkcb/Rb1/Gsk3a/Pfkfb1/Apc/Prkci/Bsg/Braf/Gpt/Tnfsf10/Stat5b/Tsc2/Max/Mtor/Inppl1/Hmga1/Mdm2/Stat2/Fam114a1/Snx5/Mapk3/Ptpra/Ucp2/Cited1/Ctnnb1/Cfl1/Gclc/Sp1/Gpam/Gnai2/Cat/Zfp106/Socs3/Sorbs1/Enpp1/Ccnd3/C1q…	105
GO:0001944	vasculature development	361	-0.302521	-1.45437	0.00116717	0.0163566	0.0124815	1637	tags=23%, list=13%, signal=20%	Prdm1/Mdm2/Hs6st1/Pak4/S100a1/Pik3cg/Emc10/Ccr2/Cited2/Myh9/Gtf2i/Ndst1/Hdac7/Tcf4/Cited1/Clic4/Ctnnb1/Sp1/Lemd3/Aggf1/Pml/Arid2/Socs3/Robo1/Enpp1/Lrg1/Tab1/Vegfb/Otulin/Smarca4/Jmjd8/Nf1/Ywhaz/Ppp3r1/Ubp1/Pdpk1/Sgpl1/Ptk2b/Slc4a7/Adipor2/Acvrl1/Nras/Plcg1/Itgb2/Eif2ak3/Dag1/Pten/Ccdc134/Sema4a/Cd93/Emilin2/Hpse/Ets1/Rapgef3/Ccm2/Rnh1/Pknox1/Flna/S1pr1/Rock2/Zmiz1/Mef2c/Lipa/Ceacam1/Jup/Rap1a/Eph…	82
GO:0051960	regulation of nervous system development	259	-0.313836	-1.45949	0.00449935	0.0395827	0.030205	2460	tags=30%, list=20%, signal=24%	Kctd11/Fmr1/Kdm4a/Fig4/Gh/Trak2/Rb1/Limk1/Ctnna1/Bmpr1a/Tg/Prkci/Stau2/Braf/Itgb1/Map2k2/Sirt2/Twf2/Tsc2/Fbxo31/Picalm/Mtor/Tenm4/Golga2/Khdc3/Cux1/Lig4/Slc7a5/Tnfrsf1b/Ptpra/Golga4/Ctnnb1/Ctsc/Camk2b/Shtn1/Il6st/Robo1/Faim/Sh3glb1/Spen/Nf1/Cers2/Atf5/Sema7a/Rgs14/Ist1/Dip2b/Adgrl2/Eif2ak3/Iqsec2/Dag1/Pten/Sema4a/Cyfip1/Clcf1/Rheb/L1cam/Rarg/Plxnb2/Ep300/Rnf10/Ppp3ca/Hap1/Tspo/Man2a1/Clstn3/Lef1/…	77
GO:0006873	intracellular monoatomic ion homeostasis	262	-0.313629	-1.46041	0.00289095	0.0297631	0.0227118	2662	tags=33%, list=22%, signal=27%	Afg3l2/Itgav/Slc30a5/Cul5/Pacs2/Mapk1/Atp2a3/Diaph1/Atp1a1/Tfrc/Pdzd8/Prnp/Tm9sf4/Prkcb/Slc39a4/Wnk1/Cln6/Ftl1/Lcn2/Slc39a13/Iscu/Slc39a10/Tcirg1/Atp6v1b2/Picalm/Atp2c1/Tmem9/Ccr2/Tmem165/Mapk3/Bmp6/Clic4/Ryr1/Smad4/Mcur1/Spns1/Slc8b1/Ndfip1/Mcub/Pml/Ankrd9/Fkbp1a/Lamp2/P2rx7/Cln5/Slc39a9/Osbpl2/Itpr3/Smdt1/Tmco1/Myo5a/Hvcn1/Lacc1/Pdpk1/Rab7/Atp2a2/Ptk2b/Tmem38a/Ccr1/Slc4a7/Plcg1/Selenon/Ppt1/Rab…	87
GO:0044089	positive regulation of cellular component biogenesis	329	-0.30672	-1.46134	0.00148361	0.019417	0.0148169	2763	tags=32%, list=23%, signal=25%	Dynll1/Lgals3/Hopx/Brk1/Ptprj/Ppp2r5b/Dock11/Mphosph8/Ccp110/Msn/Fmr1/Atmin/Tfrc/Pde4dip/Slain2/Rhoc/Slx4/Vps4b/Git1/Limk1/Apc/Baiap2l1/Slf2/Stau2/Mlst8/Braf/Dnm2/Wasf2/Rgcc/Atat1/Snx30/Rasip1/Crb3/Cdc42ep4/Hspa1b/Twf2/Cep120/Mtor/Akap9/Snx9/Abca3/Fes/Atf7ip/Avil/Abca1/Ptpn22/Myh9/Zmynd8/Bcl2l11/Smad4/Cfl1/Pphln1/G3bp2/Tlr6/Ice1/Plek/Tapt1/Sh3glb1/Tppp3/Nek7/P2rx7/Smpd3/Clip1/Pip4k2b/Mark4/Iqgap1…	104
GO:0032640	tumor necrosis factor production	126	-0.349562	-1.46741	0.00613737	0.0477495	0.036437	1517	tags=25%, list=12%, signal=22%	Ccr2/Ptpn22/Ltf/Ly96/Irak3/Rasgrp1/Slamf1/Tlr6/Ilrun/Tyrobp/Lrrfip2/Akap12/Kcnn4/Tlr9/Ticam1/Clec4a3/Cd2/Spn/Axl/Pten/Tirap/Plcg2/Vsir/Mapk14/Cd36/Tspo/Tnfrsf8/Fcgr2b/Acp5/Fcer1g/Slamf9	31
GO:0071692	protein localization to extracellular region	224	-0.322996	-1.47121	0.00347711	0.0333308	0.0254343	2485	tags=31%, list=20%, signal=25%	Erp29/Cacna1e/Cd2ap/Sidt2/Tmed10/Rapgef4/Prkcb/Ccdc186/Dgat1/Jagn1/Pfkm/Acsl4/Bsg/Golph3/Tcirg1/Aacs/Cdk16/Glud1/Stx4a/Hmga1/Abca1/Osbp/Rab3a/Abcg1/Myh9/Ucp2/Myo18a/Slc8b1/Eny2/Rab11b/Pla2g6/Plek/Trpm4/Mpc2/P2rx7/C1qtnf12/C2cd2l/Arfgap3/Gna11/Pfkl/Myo5a/Kcnn4/Psap/Golph3l/Arrb1/Gnptab/Rhbdf1/Madd/Lrrc8a/Gnas/Rac1/Adora2a/Ep300/Ppp3ca/Mafa/Hadh/Pck2/Prkce/Mia2/Map4k4/Pde3b/Anxa5/Clstn3/Stxbp3/Itpr…	70
GO:0048871	multicellular organismal-level homeostasis	496	-0.299498	-1.47334	0.000316455	0.00699865	0.00534057	2411	tags=27%, list=20%, signal=23%	Tfrc/Acaca/Alpl/Nod2/Lrp6/Scd1/Akap11/Rb1/Fosl2/Apc/Selenow/Prdx1/Pirb/Vps13b/Bsg/Cebpb/Ank/Lcn2/Sfxn1/Itgam/Ncstn/Wdr48/Itgb1/Hspa1b/Stat5b/Tcirg1/G0s2/Brd1/Picalm/Btbd9/Il2ra/Fcgr4/G6pdx/Mllt6/Cln8/Abca3/Zbtb7a/Hmga1/Ldb1/Ankrd11/Kmt2e/Sp3/Ccr2/Mex3c/Cited2/Slc39a3/Arid4a/Bmp6/Nemp1/Prdx2/Ucp2/Atf1/Ctnnb1/Bcl2l11/Acacb/Elovl6/Prrc1/Sp1/Gpam/Nkiras2/Prkab2/Enpp1/P2rx7/Lsr/Plac8/Tnfrsf17/Smarca4/…	134
GO:0009166	nucleotide catabolic process	107	-0.359763	-1.474	0.0058796	0.0468895	0.0357808	2776	tags=36%, list=23%, signal=28%	Sik2/Dnph1/Prkaa1/Mfsd8/Nudt18/Pgam2/Ncf2/Git1/Pfkfb1/Pfkm/Mlst8/Cbfa2t3/Pde7a/Samhd1/Mtor/Fkrp/Zbtb7a/Pfkp/Cnp/Nudt4/Ucp2/Pde4a/Enpp1/P2rx7/Pfkl/Jmjd8/Ogt/Ddit4/Entpd1/Nudt3/Ada/Prxl2c/Nudt9/Eno3/Ep300/Lipa/Pfkfb3/Upb1	38
GO:0006650	glycerophospholipid metabolic process	182	-0.330198	-1.47612	0.00593099	0.0471611	0.035988	2092	tags=25%, list=17%, signal=21%	Serinc1/Pigb/Pigc/Etnk1/Pigh/Gpaa1/Abhd12/Dgkg/Inppl1/Acsl3/Abca3/Pyurf/Cdipt/Pik3cg/Scarb1/Selenoi/Ttc7b/Pi4ka/Pla2g6/Abhd5/Gpam/Plek/Dgkz/Sh3glb1/Pip4p1/Pip4k2b/Agpat2/Synj2/Dgkh/Plcg1/Lpcat3/Pten/Pla2g15/Pik3c2b/Plcg2/Capn2/Dgkd/Serinc5/Gpat3/Pip5k1b/Bscl2/Naaa/Abhd6/Lpcat4/Pip5k1c	45
GO:0030155	regulation of cell adhesion	434	-0.303248	-1.47667	0.000212769	0.00543529	0.00414759	2237	tags=27%, list=18%, signal=23%	Apc/Zbtb1/Wnk1/Hspb1/Sirpa/Cebpb/Pik3r6/Braf/Dnm2/Rcc2/Rgcc/Tnfaip8l2/Itgb1/Stat5b/Tsc2/Itga4/Actl6a/Irak1/Il2ra/Abl2/Socs5/Fes/Stx4a/Ldb1/Vps33b/Ccr2/Cytip/Ptpn22/Cited2/Vav1/Bmp6/Tbx21/Ptpra/Myh9/Prdx2/Cass4/Rasgrp1/Fstl3/Cd9/Slamf1/Cfl1/Ndfip1/Sfn/Gpam/Plaur/Pml/Il6st/Arid2/Prex1/Flot2/Smarca4/Il4ra/Card11/Nf1/Coro1c/Iqgap1/Zbtb7b/Clasp1/St3gal4/Dennd6a/Coro2b/Ptk2b/Spn/Acvrl1/Cyth3/Itgb2/Ada/…	118
GO:0048812	neuron projection morphogenesis	299	-0.31285	-1.47793	0.00106269	0.0153832	0.0117387	2141	tags=26%, list=18%, signal=22%	Spg11/Stau2/Braf/Dnm2/B4galt5/Itgb1/Map2k2/Twf2/Sema4b/Nedd4l/Top2b/Tsc2/Itga4/Fbxo31/Sipa1l1/Picalm/Myo9a/Abl2/Arhgap33/Golga2/Ablim1/Rab3a/Cnp/Cux1/Golga4/Ece1/Lmtk2/Ctnnb1/Smad4/Cfl1/Camk2b/Rere/Shtn1/Robo1/Sh3glb1/Lmo4/Mark2/Pitpna/Iqgap1/Sema7a/Fam168b/Ist1/Spast/Gas7/Dvl3/Dip2b/Dynlt1a/Usp33/Dag1/Pten/Sema4a/Aplp2/Cyfip1/Flot1/Mgll/Tctn1/Rac1/L1cam/Adora2a/Plxnb2/Rock2/Mef2c/Ep300/Ppp3ca/Al…	79
GO:0071363	cellular response to growth factor stimulus	341	-0.309731	-1.47945	0.000603905	0.0107644	0.00821416	2311	tags=27%, list=19%, signal=22%	Dync1li2/Nfkb1/Prkcb/Git1/Kif16b/Bmpr1a/Mapkapk2/Hspb1/Gclm/Braf/Dnm2/Lgmn/Micall1/Itgb1/Twf2/Stat5b/Acap2/Tnrc6c/Smurf2/Lemd2/Zbtb7a/Mdm2/Apaf1/Cited2/Mapk3/Arid4a/Bmp6/Tnfrsf1b/Ndst1/Fstl3/Tcf4/Lmtk2/Cited1/Ryr1/Ctnnb1/Smad4/Cfl1/Gclc/Lemd3/Glg1/Pml/Cat/Fkbp1a/Robo1/Enpp1/Usp15/Sh3glb1/Gpr155/Lrg1/Tab1/Runx2/Smpd3/Vegfb/Ogt/Pdpk1/Iqgap1/Ddit4/Sox5/Ptpn12/Slc4a7/Acvrl1/Rab35/Plcg1/Selenon/Cd44/D…	92
GO:0040017	positive regulation of locomotion	294	-0.314128	-1.48073	0.00120267	0.0166045	0.0126707	2916	tags=34%, list=24%, signal=27%	Hyal1/Maz/Xbp1/Ano6/Plaa/Ago2/Adam10/Hdac9/Lgals3/Rreb1/Ptprj/Cib1/Itgav/Zfp703/Mapk1/Oxsr1/Ccl22/Diaph1/Mapre2/Map2k3/Dock8/Rhoc/Rapgef4/Apc/Wnk1/Hspb1/Bsg/Lcn2/Lgmn/Itgb1/Map2k2/Grb7/Stat5b/Sema4b/Nipbl/Tsc2/Itga4/Fbxo31/Abl2/Mtor/Smurf2/Stx4a/Cd151/Mdm2/Pik3cg/Emc10/Ccr2/Mapk3/Cass4/Hdac7/Slamf1/Cfl1/P2rx4/Sp1/Gpsm3/Shtn1/Il6st/Gnai2/Akap12/Prex1/Ssh1/Vegfb/Myo5a/Pdpk1/Iqgap1/Sema7a/Clasp1/Ptk…	100
GO:0055080	monoatomic cation homeostasis	287	-0.315757	-1.48213	0.00123219	0.0168658	0.0128701	2662	tags=33%, list=22%, signal=27%	Afg3l2/Itgav/Slc30a5/Cul5/Pacs2/Mapk1/Atp2a3/Diaph1/Atp1a1/Tfrc/Alpl/Pdzd8/Prnp/Tm9sf4/Prkcb/Slc39a4/Wnk1/Cln6/Ftl1/Ank/Lcn2/Slc39a13/Iscu/Slc39a10/Tcirg1/Atp6v1b2/Picalm/Btbd9/Mllt6/Atp2c1/Slc12a9/Tmem9/Ccr2/Tmem165/Mapk3/Bmp6/Clic4/Ryr1/Smad4/Mcur1/Spns1/Slc8b1/Ndfip1/Mcub/Slc34a1/Pml/Ankrd9/Fkbp1a/Enpp1/Lamp2/P2rx7/Cln5/Slc39a9/Osbpl2/Itpr3/Smdt1/Tmco1/Myo5a/Hvcn1/Lacc1/Pdpk1/Rab7/Atp2a2/Ptk2b…	96
GO:0031344	regulation of cell projection organization	404	-0.305887	-1.48353	0.000450263	0.00877921	0.0066993	2808	tags=31%, list=23%, signal=25%	Rala/Adam10/Dynll1/Rreb1/Brk1/Camk1/Cib1/Dvl1/Ppp2r5b/Scarb2/Ptprs/Dock11/Ccp110/Fmr1/Atmin/Diaph1/Fig4/Prnp/Lrp6/Rapgef4/Trak2/Limk1/Gsk3a/Apc/Hspb1/Prkci/Stau2/Braf/Dnm2/Lcn2/Wasf2/Rcc2/Cdc42ep4/Itgb1/Map2k2/Thoc2/Tmem30a/Tchp/Twf2/Gak/Nedd4l/Tsc2/Pum2/Rhog/Fbxo31/Sipa1l1/Cep120/Rab29/Picalm/Myo9a/Abl2/Dgkg/Mtor/Inppl1/Fes/Arhgap33/Mdm2/Golga2/Nme2/Khdc3/Avil/Cux1/Washc5/Golga4/Atf1/Zmynd8/Cfl1…	126
GO:0010038	response to metal ion	185	-0.330773	-1.48411	0.00318901	0.0316047	0.0241171	2438	tags=31%, list=20%, signal=25%	Pgam2/Tfrc/Rasal1/Prnp/Casp9/Gsk3a/Wnk1/Fus/Bsg/Braf/Lgmn/Ncstn/Tcirg1/Adcy7/Glud1/Mdm2/Lig4/Mapk3/Bmp6/Anxa11/Ucp2/Atf1/Clic4/Ryr1/Pef1/P2rx4/Gclc/Camk2b/Slc34a1/Cat/Hnrnpd/Enpp1/Nek7/P2rx7/Kcnmb3/Itpr3/Smpd3/Hvcn1/Iqgap1/Tlr9/Ptk2b/Npc1/Fech/Ass1/Rasgrp2/Mef2c/Ep300/Ppp3ca/Slc11a2/Alox5ap/Crip1/Plcg2/Anxa5/Tspo/Add1/Asph/Atp13a2/Akt1	58
GO:0120035	regulation of plasma membrane bounded cell projection organization	395	-0.30697	-1.48605	0.000462717	0.0088771	0.00677399	2808	tags=31%, list=23%, signal=25%	Rala/Adam10/Dynll1/Rreb1/Brk1/Camk1/Cib1/Dvl1/Ppp2r5b/Scarb2/Ptprs/Dock11/Ccp110/Fmr1/Atmin/Diaph1/Fig4/Prnp/Lrp6/Rapgef4/Trak2/Limk1/Gsk3a/Apc/Hspb1/Prkci/Stau2/Braf/Dnm2/Wasf2/Rcc2/Cdc42ep4/Itgb1/Map2k2/Thoc2/Tmem30a/Tchp/Twf2/Gak/Nedd4l/Tsc2/Pum2/Rhog/Fbxo31/Sipa1l1/Cep120/Rab29/Picalm/Abl2/Dgkg/Mtor/Inppl1/Fes/Arhgap33/Mdm2/Golga2/Nme2/Khdc3/Avil/Cux1/Washc5/Golga4/Atf1/Zmynd8/Cfl1/Camk2b/Cap…	123
GO:0050796	regulation of insulin secretion	105	-0.364269	-1.48653	0.00455774	0.0399737	0.0305034	2440	tags=36%, list=20%, signal=29%	Cacna1e/Sidt2/Rapgef4/Prkcb/Jagn1/Pfkm/Acsl4/Tcirg1/Aacs/Cdk16/Glud1/Stx4a/Osbp/Abcg1/Myh9/Ucp2/Slc8b1/Eny2/Pla2g6/Trpm4/Mpc2/C1qtnf12/C2cd2l/Gna11/Pfkl/Arrb1/Lrrc8a/Gnas/Rac1/Ppp3ca/Hadh/Pck2/Prkce/Map4k4/Pde3b/Itpr1/Oxct1/Camk2n1	38
GO:0043588	skin development	127	-0.354322	-1.48758	0.00508601	0.0429275	0.0327574	1611	tags=28%, list=13%, signal=25%	Ldb1/Nme2/Vps33b/Tmprss13/Dhcr24/Clic4/Ryr1/Ctnnb1/Smad4/Pphln1/Sfn/Enpp1/Lsr/Smarca4/Flnb/Nf1/Myo5a/Ubn1/Psap/Trpc4ap/Tnfrsf19/Asah1/Sgpp1/Hpse/Cdkn1a/Elovl1/Gnas/Rock2/Mfsd12/Ppp3ca/Jup/Acvr1b/Sostdc1/Cbx7/Akt1/Plec	36
GO:0090276	regulation of peptide hormone secretion	118	-0.358136	-1.48792	0.00587059	0.0468895	0.0357808	2440	tags=35%, list=20%, signal=28%	Cacna1e/Sidt2/Rapgef4/Prkcb/Jagn1/Pfkm/Acsl4/Tcirg1/Aacs/Cdk16/Glud1/Stx4a/Osbp/Abcg1/Myh9/Ucp2/Slc8b1/Eny2/Pla2g6/Trpm4/Mpc2/C1qtnf12/C2cd2l/Gna11/Pfkl/Arrb1/Madd/Lrrc8a/Clcf1/Gnas/Rac1/Ppp3ca/Hadh/Pck2/Prkce/Map4k4/Pde3b/Anxa5/Itpr1/Oxct1/Camk2n1	41
GO:0034762	regulation of transmembrane transport	221	-0.327891	-1.49108	0.00338903	0.0325743	0.024857	2478	tags=38%, list=20%, signal=30%	Ywhah/Chp1/Bak1/Rangrf/Ano6/Yes1/Pea15a/Hspa2/Afg3l2/Grk2/Oxsr1/Rasgrf2/Fmr1/Diaph1/Prnp/Gh/Prkcb/Gsk3a/Wnk1/Arhgef11/Prkci/Braf/Lcn2/Itgb1/Iscu/Tcirg1/Nedd4l/Oaz1/G6pdx/Mtor/Akap9/Pik3cg/Ccr2/Fgf11/Ptpn22/Slc7a5/Stac2/Ucp2/P2rx4/Mcub/Slc34a1/Pml/Sorbs1/Fkbp1a/Enpp1/P2rx7/C1qtnf12/Fxyd5/Azin1/Slc6a9/Ehd3/Myo5a/Ppp3r1/Kcnn4/Pdpk1/Tlr9/Ptk2b/Tmem38a/Cbarp/Adipor2/Tspan13/Ywhaq/Plcg1/Slc38a1/Selenon…	83
GO:0007610	behavior	321	-0.314564	-1.4924	0.000633365	0.0112059	0.00855105	2742	tags=29%, list=23%, signal=23%	Npw/Prkaa1/Cyp11a1/Mfsd8/Dvl1/Atxn1/Mbd2/Tmod2/Crebbp/Napepld/Usp46/Fmr1/Cacna1e/Fig4/Prnp/Atad1/Git1/Dgat1/Gls/Cln6/Pirb/Vps13b/Spg11/Braf/Syt11/Lcn2/Lgmn/Ncstn/Itgb1/Oxr1/Fbxl20/Tsc2/Picalm/Btbd9/Abca2/Nipal3/Abl2/Fuom/Abhd12/Mtor/Fkrp/Glud1/Cln8/Ankrd11/Cic/Cnp/P2rx4/Hexa/Chrnb1/Pla2g6/Trpm4/Gm2a/Enpp1/Rcan1/Ap1s2/Itpr3/Nf1/Myo5a/Psap/Nr2c2/Eif4ebp2/Rgs14/Slc4a7/Uba6/Ppt1/Ada/Man2b1/Pten/Zdhhc…	94
GO:0048762	mesenchymal cell differentiation	103	-0.366554	-1.49465	0.00604008	0.0474546	0.036212	2646	tags=39%, list=22%, signal=31%	Zfp703/Usf3/Spsb3/Mapk1/Otud5/Lrp6/Bmpr1a/Rgcc/Slc39a10/Sema4b/Tsc2/Mtor/Trim62/Cited2/Mapk3/Ctnnb1/Smad4/Cfl1/Pef1/Plaur/Tapt1/Lrg1/Ddx17/Ppp3r1/Coro1c/Sema7a/Clasp1/Dag1/Pten/Amer1/Sema4a/Flna/Trip10/Glipr2/Rock2/Mef2c/Adam15/Lef1/Zeb2/Hes1	40
GO:0051222	positive regulation of protein transport	180	-0.335833	-1.49526	0.00244517	0.0269138	0.0205375	2337	tags=32%, list=19%, signal=26%	Tmed10/Bag3/Rapgef4/Tm9sf4/Prkcb/Ergic3/Pfkm/Pcnt/Acsl4/Bsg/Golph3/Tmem30a/Rab29/Oaz1/Aacs/Acsl3/Glud1/Atp2c1/Stx4a/Mdm2/Osbp/Abcg1/Ptpn22/Myh9/Vps28/Bcap31/Myo18a/Ice1/Pla2g6/Sfn/Trpm4/Mpc2/P2rx7/C1qtnf12/C2cd2l/Gna11/Kcnn4/Edem1/Golph3l/Arrb1/Ubr5/Lrrc8a/Rapgef3/Flna/Gnas/Rac1/Adora2a/Ep300/Jup/Pck2/Prkce/Mapk14/Itpr1/Asph/Oxct1/Atp13a2/Camk2n1	57
GO:2000147	positive regulation of cell motility	290	-0.31883	-1.49745	0.0011045	0.0157499	0.0120185	2916	tags=34%, list=24%, signal=27%	Hyal1/Maz/Xbp1/Ano6/Plaa/Ago2/Adam10/Hdac9/Lgals3/Rreb1/Ptprj/Cib1/Itgav/Zfp703/Mapk1/Oxsr1/Ccl22/Diaph1/Mapre2/Map2k3/Dock8/Rhoc/Rapgef4/Apc/Wnk1/Hspb1/Bsg/Lcn2/Lgmn/Itgb1/Map2k2/Grb7/Stat5b/Sema4b/Nipbl/Tsc2/Itga4/Fbxo31/Abl2/Mtor/Smurf2/Stx4a/Cd151/Mdm2/Pik3cg/Emc10/Ccr2/Mapk3/Cass4/Hdac7/Slamf1/Cfl1/P2rx4/Sp1/Gpsm3/Shtn1/Il6st/Gnai2/Akap12/Prex1/Ssh1/Vegfb/Myo5a/Pdpk1/Iqgap1/Sema7a/Clasp1/Ptk…	100
GO:0006644	phospholipid metabolic process	231	-0.326931	-1.49803	0.00201042	0.0241211	0.0184065	2383	tags=27%, list=20%, signal=22%	Fig4/Gdpd3/Inpp5a/Isyna1/Plpp1/Vapa/Serinc1/Pigb/Pigc/Etnk1/Pigh/Gpaa1/Abca2/Fitm2/Abhd12/Dgkg/Inppl1/Acsl3/Cln8/Abca3/Pyurf/Cdipt/Hmgcs1/Pik3cg/Osbp/Scarb1/Selenoi/Ttc7b/Pi4ka/Pla2g6/Abhd5/Gpam/Plek/Dgkz/Sh3glb1/Pip4p1/Smpd3/Pip4k2b/Agpat2/Synj2/Dgkh/Plcg1/Lpcat3/Pten/Sgpp1/Plpp2/Pla2g15/Pik3c2b/Idh1/Plcg2/Capn2/Gnb3/Dgkd/Serinc5/Gpat3/Pip5k1b/Bscl2/Naaa/Abhd6/Lpcat4/Hexb/Pip5k1c	62
GO:0050801	monoatomic ion homeostasis	289	-0.31966	-1.50109	0.00150134	0.019542	0.0149122	2662	tags=34%, list=22%, signal=27%	Afg3l2/Itgav/Slc30a5/Cul5/Pacs2/Mapk1/Atp2a3/Diaph1/Atp1a1/Tfrc/Alpl/Pdzd8/Prnp/Tm9sf4/Prkcb/Slc39a4/Wnk1/Cln6/Ftl1/Ank/Lcn2/Slc39a13/Iscu/Slc39a10/Tcirg1/Atp6v1b2/Picalm/Btbd9/Mllt6/Atp2c1/Slc12a9/Tmem9/Ccr2/Tmem165/Mapk3/Bmp6/Clic4/Ryr1/Smad4/Mcur1/Spns1/Slc8b1/Ndfip1/Mcub/Slc34a1/Pml/Ankrd9/Fkbp1a/Enpp1/Lamp2/P2rx7/Cln5/Slc39a9/Osbpl2/Itpr3/Smdt1/Tmco1/Myo5a/Hvcn1/Lacc1/Pdpk1/Rab7/Atp2a2/Ptk2b…	97
GO:0030335	positive regulation of cell migration	283	-0.319701	-1.50161	0.000806332	0.0129265	0.00986405	2916	tags=35%, list=24%, signal=27%	Hyal1/Maz/Xbp1/Ano6/Plaa/Ago2/Adam10/Hdac9/Lgals3/Rreb1/Ptprj/Cib1/Itgav/Zfp703/Mapk1/Oxsr1/Ccl22/Diaph1/Mapre2/Map2k3/Dock8/Rhoc/Rapgef4/Apc/Wnk1/Hspb1/Bsg/Lcn2/Lgmn/Itgb1/Grb7/Stat5b/Sema4b/Nipbl/Tsc2/Itga4/Fbxo31/Abl2/Mtor/Smurf2/Stx4a/Cd151/Mdm2/Pik3cg/Emc10/Ccr2/Mapk3/Cass4/Hdac7/Slamf1/P2rx4/Sp1/Gpsm3/Shtn1/Il6st/Gnai2/Akap12/Prex1/Ssh1/Vegfb/Myo5a/Pdpk1/Iqgap1/Sema7a/Clasp1/Ptk2b/Ccr1/Spn/…	98
GO:0044057	regulation of system process	220	-0.33026	-1.50271	0.00143917	0.0191502	0.0146132	3297	tags=43%, list=27%, signal=32%	Oga/Cd38/Prkca/Dicer1/Mef2a/Cst7/Rhoa/Slc25a12/Prkcz/Tbxa2r/Pebp1/Nfatc3/Tnnt1/Akap1/Rangrf/Scn4a/Lmna/Hopx/Calcrl/Dvl1/Homer3/Srebf1/Sh3gl1/Grk2/Cacna1h/Fmr1/Cacna1e/Atp1a1/Fig4/Rapgef4/Gsk3a/Dgat1/Wnk1/Gls/S1pr2/Itgb1/Itga4/G6pdx/Mtor/Tenm4/Akap9/Mdm2/S100a1/Fbxo32/Bmp6/Tnfrsf1b/Ctdp1/Ece1/Zmynd8/Ryr1/Faah/Smad4/Acacb/P2rx4/Ctsc/Trpm4/Cdk9/Ssh1/Ehd3/Kcnn4/Atp2a2/Coro2b/Ptk2b/Tmem38a/Add3/Seleno…	95
GO:0009306	protein secretion	221	-0.330566	-1.50325	0.00273835	0.0288466	0.0220124	2485	tags=32%, list=20%, signal=26%	Erp29/Cacna1e/Cd2ap/Sidt2/Tmed10/Rapgef4/Prkcb/Ccdc186/Dgat1/Jagn1/Pfkm/Acsl4/Bsg/Golph3/Tcirg1/Aacs/Cdk16/Glud1/Stx4a/Hmga1/Abca1/Osbp/Rab3a/Abcg1/Myh9/Ucp2/Myo18a/Slc8b1/Eny2/Rab11b/Pla2g6/Plek/Trpm4/Mpc2/P2rx7/C1qtnf12/C2cd2l/Arfgap3/Gna11/Pfkl/Myo5a/Kcnn4/Psap/Golph3l/Arrb1/Gnptab/Rhbdf1/Madd/Lrrc8a/Gnas/Rac1/Adora2a/Ep300/Ppp3ca/Mafa/Hadh/Pck2/Prkce/Mia2/Map4k4/Pde3b/Anxa5/Clstn3/Stxbp3/Itpr…	70
GO:0035592	establishment of protein localization to extracellular region	221	-0.330566	-1.50325	0.00273835	0.0288466	0.0220124	2485	tags=32%, list=20%, signal=26%	Erp29/Cacna1e/Cd2ap/Sidt2/Tmed10/Rapgef4/Prkcb/Ccdc186/Dgat1/Jagn1/Pfkm/Acsl4/Bsg/Golph3/Tcirg1/Aacs/Cdk16/Glud1/Stx4a/Hmga1/Abca1/Osbp/Rab3a/Abcg1/Myh9/Ucp2/Myo18a/Slc8b1/Eny2/Rab11b/Pla2g6/Plek/Trpm4/Mpc2/P2rx7/C1qtnf12/C2cd2l/Arfgap3/Gna11/Pfkl/Myo5a/Kcnn4/Psap/Golph3l/Arrb1/Gnptab/Rhbdf1/Madd/Lrrc8a/Gnas/Rac1/Adora2a/Ep300/Ppp3ca/Mafa/Hadh/Pck2/Prkce/Mia2/Map4k4/Pde3b/Anxa5/Clstn3/Stxbp3/Itpr…	70
GO:0120039	plasma membrane bounded cell projection morphogenesis	308	-0.317899	-1.50354	0.000867419	0.0132128	0.0100825	2141	tags=27%, list=18%, signal=23%	Spg11/Stau2/Braf/Dnm2/Myo9b/Wasf2/B4galt5/Itgb1/Map2k2/Twf2/Sema4b/Nedd4l/Top2b/Tsc2/Itga4/Fbxo31/Sipa1l1/Picalm/Myo9a/Abl2/Arhgap33/Golga2/Ablim1/Rab3a/Cnp/Cux1/Golga4/Ece1/Lmtk2/Ctnnb1/Smad4/Cfl1/Camk2b/Rere/Shtn1/Robo1/Sh3glb1/Lmo4/Mark2/Pitpna/Coro1c/Iqgap1/Sema7a/Fam168b/Ist1/Spast/Gas7/Dvl3/Dip2b/Dynlt1a/Cd44/Usp33/Dag1/Pten/Sema4a/Aplp2/Cyfip1/Flot1/Mgll/Tctn1/Rac1/L1cam/Adora2a/Plxnb2/Roc…	83
GO:0002009	morphogenesis of an epithelium	239	-0.326579	-1.5047	0.00237213	0.0264796	0.0202062	2029	tags=25%, list=17%, signal=21%	Rasip1/Crb3/Fkbpl/Tsc2/Exoc5/Myo9a/Abl2/Mtor/Cd151/Apaf1/Cited2/Prkacb/Cited1/Clic4/Ctnnb1/Smad4/Cfl1/Pml/Grsf1/Med12/Socs3/Robo1/Enpp1/Lrg1/Hs2st1/Lmo4/Smarca4/Ppp3r1/Mthfd1l/Clasp1/Acvrl1/Cd44/Jhy/Csnk2b/Dag1/Pten/Scrib/Mrtfa/Ccm2/Tctn1/Stk3/Flna/Rarg/Plxnb2/Rock2/Mef2c/Ceacam1/Vcl/Lzts2/Hdac5/Lef1/Prickle1/Rab10/Sostdc1/Zeb2/Cecr2/Ctsh/Hes1/Mtss1	59
GO:0000165	MAPK cascade	390	-0.312352	-1.50906	0.000237405	0.00593762	0.00453092	1813	tags=24%, list=15%, signal=21%	Irak1/Mydgf/Abl2/Naip2/Inppl1/Lemd2/Map3k20/Ccdc88c/Pak4/Sla/Pik3cg/Ccr2/Ptpn22/Mapk3/Myh9/Irak3/Ndst1/Prdx2/Timp2/Rasgrp1/Rb1cc1/Rell1/Ece1/Ctnnb1/Slamf1/Smad4/Tlr6/Bnip2/Stk40/Gnai2/Unc5cl/Robo1/Zmynd11/Atf7/P2rx7/Akap12/Tab1/Vegfb/Nf1/Ywhaz/Kcnn4/Iqgap1/Sema7a/Tlr9/Pabpn1/Psap/Nr2c2/Rgs14/Ptk2b/Dok2/Ccr1/Arrb1/Dvl3/Traf7/Cd44/Prxl2c/Dusp22/Tnfrsf19/Madd/Dag1/Pten/Map3k14/Hacd3/Abca7/Dusp5/Clcf…	95
GO:0008361	regulation of cell size	112	-0.364873	-1.50986	0.00538334	0.0444917	0.033951	2905	tags=36%, list=24%, signal=27%	Tnfrsf12a/Ano6/Slc12a8/Ptprs/Oxsr1/Msn/Wdtc1/Limk1/Wnk1/Dnm2/Twf2/Tsc2/Pum2/Mtor/Cln8/Slc12a9/Vav1/Golga4/Rb1cc1/Cfl1/Shtn1/Plek/P2rx7/Ogt/Kcnn4/Sema7a/Ist1/Dip2b/Lrrc8a/Pten/Cyfip1/Rapgef3/Mgll/Rac1/L1cam/Ep300/Gnb3/Mtpn/Add1/Akt1	40
GO:0046883	regulation of hormone secretion	136	-0.35292	-1.51145	0.00441679	0.0391447	0.0298708	2440	tags=33%, list=20%, signal=27%	Cacna1e/Sidt2/Rapgef4/Prkcb/Jagn1/Pfkm/Acsl4/Tcirg1/Aacs/Cdk16/Glud1/Tmf1/Stx4a/Osbp/Abcg1/Bmp6/Myh9/Ucp2/Smad4/Slc8b1/Eny2/Pla2g6/Trpm4/Mpc2/C1qtnf12/C2cd2l/Gna11/Pfkl/Arrb1/Madd/Lrrc8a/Clcf1/Gnas/Rac1/Ppp3ca/Hadh/Pck2/Prkce/Map4k4/Pde3b/Anxa5/Tspo/Itpr1/Oxct1/Camk2n1	45
GO:0055001	muscle cell development	104	-0.370874	-1.51369	0.00408015	0.0371576	0.0283545	3022	tags=42%, list=25%, signal=32%	Pdlim5/Map2k4/Actg1/Dicer1/Mef2a/Nfatc3/Tnnt1/Sdc1/Lncpint/Hdac9/Lmna/Afg3l2/Tmod2/Col14a1/Gpx1/Alpk2/Actn1/Gsk3a/Bmpr1a/Spg11/Itgb1/G6pdx/Mtor/Ctdp1/Ryr1/Smad4/Chrnb1/Rcan1/Atp2a2/Selenon/Actn4/Tpm1/Trip10/Tmod3/Mef2c/Ep300/Ppp3ca/Yy1/Krt8/Hdac5/Prickle1/Myl9/Hes1/Plec	44
GO:0009887	animal organ morphogenesis	405	-0.312217	-1.51524	0.000109722	0.00374388	0.0028569	3003	tags=36%, list=25%, signal=28%	Rpl13a/Tcf7/E2f5/Hhex/Tmem107/Sos1/Ahdc1/Hyal1/Xbp1/Bak1/Ly6e/Sapcd2/Btrc/Kat6a/Chsy1/Zhx2/Rpgrip1/Prkx/Dvl1/Chuk/Tshz1/Itgav/Btbd7/Mapk1/Msn/Thbs3/Alpk2/Pds5a/Alpl/Slc39a1/Lrp6/Nfkb1/Prkcb/Fosl2/Gsk3a/Ctnna1/Bmpr1a/Apc/Sik3/Mrtfb/Pcnt/Prkci/Rom1/Bsg/Cebpb/Taf10/Stau2/Ank/Wdr48/Map2k2/Gak/Tcirg1/Nipbl/Mtor/Inppl1/Fkrp/Lemd2/Prdm1/Hmga1/Mdm2/Ankrd11/Vps33b/Sp3/Plekha1/Cited2/Slc39a3/Mapk3/Bmp6/Ltf…	147
GO:0043087	regulation of GTPase activity	130	-0.359184	-1.51642	0.00304899	0.0306632	0.0233987	2191	tags=33%, list=18%, signal=27%	Sgsm3/Mapre2/Dock8/Wnk1/Mlst8/Gpsm1/Myo9b/Rcc2/Rasip1/Arap2/Itgb1/Tsc2/Rhog/Rgp1/Sipa1l1/Myo9a/Mtor/Snx9/Vav1/Rasgrp1/Tbc1d10b/Asap1/Pot1b/Prex1/Nf1/Coro1c/Rgs14/Dvl3/Sgsm2/Rgs10/Scrib/Rapgef3/Ralbp1/Rasgrp2/Plxnb2/Ccpg1/Rap1a/Map4k4/Adap1/S100a10/Evi5/Gpr137b/Rsu1	43
GO:0045017	glycerolipid biosynthetic process	147	-0.349807	-1.51655	0.00472499	0.0409642	0.0312592	2241	tags=29%, list=18%, signal=24%	Plpp1/Tmem68/Dgat1/Acsl4/Pigb/Pigc/Etnk1/Pigh/Gpaa1/Daglb/Fitm2/Dgkg/Inppl1/Acsl3/Pyurf/Cdipt/Avil/Pik3cg/Scarb1/Selenoi/Ttc7b/Pi4ka/Pla2g6/Abhd5/Gpam/Dgkz/Sh3glb1/Pip4k2b/Agpat2/Dgkh/Cnep1r1/Lpcat3/Pla2g15/Pik3c2b/Pck2/Plcg2/Capn2/Dgkd/Gpat3/Pip5k1b/Bscl2/Pip5k1c	42
GO:0008154	actin polymerization or depolymerization	130	-0.359231	-1.51662	0.00304899	0.0306632	0.0233987	1719	tags=25%, list=14%, signal=22%	Mtor/Gba2/Snx9/Avil/Washc5/Arpc5/Cfl1/Capzb/Plek/Svil/Sptbn1/Prex1/Ssh1/Ptk2b/Gas7/Add3/Cyfip1/Sptan1/Arpc5l/Gm14137/Tpm1/Rac1/Ssh2/Tmod3/Dstn/Prkce/Mical1/Mtpn/Add1/Sptb/Myadm/Lima1/Mtss1	33
GO:0021700	developmental maturation	171	-0.342749	-1.51677	0.00319553	0.0316047	0.0241171	2911	tags=33%, list=24%, signal=26%	Atp6v1e1/Xbp1/Pou2f2/Xylt1/Ano6/Ago2/H3f3a/Pcsk4/Ankrd17/Vezt/Nom1/Ap1m1/Thbs3/Rb1/B4galt5/Sirt2/Atp6v1b2/Brd1/Picalm/Abl2/G6pdx/Mtor/Zbtb7a/Abhd2/Atp6v1c1/Anks1/Rab3a/Nemp1/Washc5/Ltf/Ryr1/Ctnnb1/Bhlha15/Camk2b/Rere/Lsm14b/Enpp1/Runx2/Mbtps2/Nf1/Ywhaz/Myo5a/Maea/Sema7a/Ptk2b/L3mbtl3/Trpc4ap/Dag1/Axl/Pten/Rac1/S1pr1/Rock2/Igsf21/Akt1/Hes1/Cdc25b	57
GO:0006096	glycolytic process	73	-0.399271	-1.51872	0.00595314	0.0471611	0.035988	4201	tags=52%, list=35%, signal=34%	Aldoc/Hdac4/Nupr1/Khk/Prkag1/Insr/Tpi1/Mpi/Ier3/Prkag2/Rptor/Ppp2ca/Foxk1/Sik2/Prkaa1/Mfsd8/Pgam2/Git1/Pfkfb1/Pfkm/Mlst8/Cbfa2t3/Mtor/Fkrp/Zbtb7a/Pfkp/Ucp2/Enpp1/P2rx7/Pfkl/Jmjd8/Ogt/Ddit4/Prxl2c/Eno3/Ep300/Lipa/Pfkfb3	38
GO:0007169	cell surface receptor protein tyrosine kinase signaling pathway	290	-0.323696	-1.52031	0.000683138	0.0118667	0.00905534	3281	tags=41%, list=27%, signal=31%	Rps6kb2/Pik3ca/Hif1an/Prkca/Pik3cd/Sos2/Cpne3/Slc9a6/Slc31a1/Raf1/Akt1s1/Prkcz/Marcks/Hhex/Sos1/Xbp1/Yes1/Dstyk/Rala/Blvrb/Sik2/Cep57/Prkaa1/Lonp1/Ptprj/Atxn1/Ppp2r5b/Srebf1/Mapk1/Sh2b3/Cd2ap/Diaph1/Gh/Rnf115/Prkcb/Git1/Gsk3a/Kif16b/Mapkapk2/Apc/Rnf126/Hspb1/Atxn7/Braf/Lgmn/Itgb1/Map2k2/Stat5b/Tsc2/Sipa1l1/Abl2/Inppl1/Socs5/Hmga1/Anks1/Sh2d3c/Plekha1/Snx5/Mapk3/Ptpra/Gigyf1/Ndst1/Cass4/Anks1b/Tcf…	119
GO:0030100	regulation of endocytosis	195	-0.3372	-1.52201	0.00202243	0.0241211	0.0184065	2489	tags=31%, list=20%, signal=25%	Usp46/Fmr1/Cd2ap/Nod2/Cd300a/Atad1/Rab4b/Sirpa/Dnm2/Syt11/Ighm/Cnn2/Itgb1/Sirt2/Nedd4l/Tsc2/Picalm/Btbd9/Abca2/Rab5b/Snx9/Cd151/Mdm2/Scarb1/Myh9/Tnk2/Vps28/Myo18a/Hck/Pot1b/Ppp3r1/Ankrd13d/Arrb1/Ppt1/Actn4/Axl/Pten/Abca7/Scrib/Hip1/Flot1/Rac1/Ldlrap1/Ppp3ca/Hap1/Rap1a/Plcg2/Nsf/Cd36/Pacsin2/Add1/Cd22/Dgkd/Rab31/Fcgr2b/Rin3/Fcer1g/Anxa2/Ehd4/Pip5k1c	60
GO:0007178	cell surface receptor protein serine/threonine kinase signaling pathway	170	-0.34492	-1.52277	0.0032743	0.0321133	0.0245052	1702	tags=25%, list=14%, signal=22%	Smurf2/Lemd2/Zbtb7a/Cited2/Mapk3/Arid4a/Bmp6/Fstl3/Cited1/Ryr1/Smad4/Lemd3/Glg1/Pml/Sptbn1/Fkbp1a/Usp15/Gpr155/Lrg1/Tab1/Runx2/Smpd3/Ogt/Pdpk1/Acvrl1/Selenon/Dusp22/Fut8/Csnk2b/Itga8/Zmiz1/Zyx/Ep300/Fstl1/Parp1/Vsir/Mapk14/Acvr1b/Lef1/Sostdc1/Twsg1/Zeb2/Hes1	43
GO:1901699	cellular response to nitrogen compound	381	-0.315961	-1.52382	0.000165737	0.00465721	0.00355385	2369	tags=29%, list=19%, signal=24%	Nod2/Bcl2l2/Prnp/Wdtc1/Gh/Nfkb1/Prkcb/Rb1/Nod1/Gsk3a/Ctnna1/Apc/Gclm/Prkci/Dnm2/Gpt/Golph3/Lgmn/Ncstn/Hdac8/Stat5b/Top2b/Tsc2/Itga4/Max/Oaz1/Mtor/Inppl1/Akap9/Hmga1/Mdm2/Mat2a/Pik3cg/Fam114a1/Snx5/Ptpn22/Mapk3/Slc7a5/Ptpra/Ucp2/Ryr1/Ctnnb1/Cfl1/P2rx4/Gclc/Tlr6/Chrnb1/Sp1/Gpam/Gnai2/Trpm4/Zfp106/Socs3/Sorbs1/Ddi2/Hnrnpd/Larp1/Ly6m/Gnai3/Enpp1/Stambpl1/P2rx7/C1qtnf12/Gna11/Itpr3/Ssh1/Recql5/Echdc3/…	112
GO:1905952	regulation of lipid localization	91	-0.38333	-1.5267	0.00445248	0.0393152	0.0300009	1813	tags=33%, list=15%, signal=28%	Irak1/Abca2/Fitm2/Tmem135/Tmf1/Abca3/Abca1/Scarb1/Abcg1/Bmp6/Acacb/Pla2g6/Abhd5/Dennd5b/P2rx7/Prelid1/Asxl1/Pltp/Lpcat3/Zdhhc8/Abca7/Ldlrap1/Cd36/Tspo/Clstn3/Plin3/Plin2/Srebf2/Akt1/Anxa2	30
GO:0048858	cell projection morphogenesis	309	-0.322282	-1.52687	0.000822613	0.0130863	0.00998598	2141	tags=27%, list=18%, signal=23%	Spg11/Stau2/Braf/Dnm2/Myo9b/Wasf2/B4galt5/Itgb1/Map2k2/Twf2/Sema4b/Nedd4l/Top2b/Tsc2/Itga4/Fbxo31/Sipa1l1/Picalm/Myo9a/Abl2/Arhgap33/Golga2/Ablim1/Rab3a/Cnp/Cux1/Golga4/Ece1/Lmtk2/Ctnnb1/Smad4/Cfl1/Camk2b/Rere/Shtn1/Robo1/Sh3glb1/Lmo4/Mark2/Pitpna/Coro1c/Iqgap1/Sema7a/Fam168b/Ist1/Spast/Gas7/Dvl3/Dip2b/Dynlt1a/Cd44/Usp33/Dag1/Pten/Sema4a/Aplp2/Cyfip1/Flot1/Mgll/Tctn1/Rac1/L1cam/Adora2a/Plxnb2/Roc…	84
GO:0007167	enzyme-linked receptor protein signaling pathway	443	-0.313596	-1.52865	0.000103377	0.00357849	0.0027307	2834	tags=34%, list=23%, signal=27%	Yes1/Dstyk/Rala/Blvrb/Sik2/Cep57/Trim33/Prkaa1/Lonp1/Ptprj/Snx1/Atxn1/Ppp2r5b/Srebf1/Zfp703/Sap130/Mapk1/Crebbp/Sh2b3/Cd2ap/Diaph1/Crim1/Gh/Rnf115/Prkcb/Git1/Gsk3a/Kif16b/Bmpr1a/Mapkapk2/Apc/Rnf126/Hspb1/Atxn7/Braf/Dnm2/Lgmn/Itgb1/Map2k2/Stat5b/Tsc2/Sipa1l1/Tnrc6c/Abl2/Inppl1/Smurf2/Lemd2/Socs5/Zbtb7a/Hmga1/Anks1/Sh2d3c/Plekha1/Snx5/Cited2/Mapk3/Arid4a/Bmp6/Ptpra/Gigyf1/Ndst1/Cass4/Anks1b/Fstl3/T…	150
GO:0016052	carbohydrate catabolic process	123	-0.365202	-1.5301	0.00474162	0.0410339	0.0313124	3320	tags=41%, list=27%, signal=30%	Glb1/Rptor/Bad/Ppp2ca/Ldha/Ctbs/Slc25a12/Foxk1/Man2b2/Sik2/Prkaa1/Mfsd8/Scarb2/Wipi2/Pgam2/Git1/Pfkfb1/Pfkm/Mlst8/Pgm2/Cbfa2t3/Chil3/Mtor/Fkrp/Zbtb7a/Pfkp/Ucp2/Rb1cc1/Naga/Hsd11b1/Gm2a/Enpp1/P2rx7/Agl/Pfkl/Jmjd8/Ogt/Ddit4/Prxl2c/Man2b1/Neu1/Chit1/Atg2a/Eno3/Ep300/Lipa/Pygm/Pfkfb3/Phkb/Hexb	50
GO:0008286	insulin receptor signaling pathway	94	-0.382527	-1.53246	0.00642916	0.0492971	0.0376179	3281	tags=44%, list=27%, signal=32%	Rps6kb2/Pik3ca/Prkca/Sos2/Raf1/Prkcz/Marcks/Sos1/Blvrb/Sik2/Prkaa1/Lonp1/Ptprj/Srebf1/Mapk1/Prkcb/Gsk3a/Apc/Tsc2/Inppl1/Hmga1/Snx5/Mapk3/Ptpra/Gnai2/Zfp106/Socs3/Sorbs1/Enpp1/C1qtnf12/Pip4k2b/Nucks1/Ogt/Ctsd/Pdpk1/Zbtb7b/Eif4ebp2/Eif4ebp1/Ptpre/Rhoq/Akt1	41
GO:0098876	vesicle-mediated transport to the plasma membrane	123	-0.365826	-1.53272	0.00457328	0.040012	0.0305326	2226	tags=29%, list=18%, signal=24%	Ehd2/Vps13b/Dnm2/Snx30/Golph3/Micall1/Exoc5/Acap2/Vps50/Acsl3/Atp2c1/Stx4a/Golga4/Lmtk2/Rab11b/Sptbn1/Exoc1/Exoc8/Ehd3/Rab7/Def6/Arl3/Rab12/Golph3l/Rab35/Rab11a/Vps51/Scrib/Gga1/Nsf/Rab10/Rab31/Fcgr2b/Cmtm6/Ehd4/Krt18	36
GO:0043270	positive regulation of monoatomic ion transport	89	-0.385932	-1.53346	0.00547909	0.0448178	0.0341999	1730	tags=29%, list=14%, signal=25%	G6pdx/Mllt6/Akap9/Ccr2/Stac2/P2rx4/P2rx7/Fxyd5/Ehd3/Ppp3r1/Pdpk1/Ccr1/Plcg1/Rapgef3/Flna/Gnas/Ppp3ca/Gsto1/Atp2b1/Hap1/Plcg2/Tspo/Itpr1/Gpd1l/Asph/Akt1	26
GO:0141091	transforming growth factor beta receptor superfamily signaling pathway	157	-0.350013	-1.53358	0.00416715	0.0377732	0.0288242	1702	tags=26%, list=14%, signal=23%	Smurf2/Lemd2/Zbtb7a/Cited2/Mapk3/Arid4a/Bmp6/Fstl3/Cited1/Ryr1/Smad4/Lemd3/Glg1/Pml/Fkbp1a/Usp15/Gpr155/Lrg1/Tab1/Runx2/Smpd3/Ogt/Pdpk1/Acvrl1/Selenon/Dusp22/Fut8/Csnk2b/Itga8/Zmiz1/Zyx/Ep300/Fstl1/Parp1/Vsir/Acvr1b/Lef1/Sostdc1/Twsg1/Zeb2/Hes1	41
GO:0008654	phospholipid biosynthetic process	153	-0.352445	-1.53658	0.00465695	0.0405954	0.0309778	2253	tags=27%, list=19%, signal=23%	Isyna1/Vapa/Serinc1/Pigb/Pigc/Etnk1/Pigh/Gpaa1/Abca2/Fitm2/Dgkg/Inppl1/Acsl3/Pyurf/Cdipt/Hmgcs1/Pik3cg/Osbp/Selenoi/Ttc7b/Pi4ka/Pla2g6/Abhd5/Gpam/Dgkz/Sh3glb1/Pip4k2b/Agpat2/Dgkh/Lpcat3/Pik3c2b/Idh1/Plcg2/Capn2/Dgkd/Serinc5/Gpat3/Pip5k1b/Bscl2/Lpcat4/Hexb/Pip5k1c	42
GO:0060562	epithelial tube morphogenesis	165	-0.350844	-1.54058	0.00261458	0.0280671	0.0214176	1502	tags=22%, list=12%, signal=19%	Cited2/Prkacb/Cited1/Clic4/Ctnnb1/Smad4/Cfl1/Pml/Med12/Robo1/Hs2st1/Lmo4/Ppp3r1/Mthfd1l/Acvrl1/Cd44/Csnk2b/Dag1/Scrib/Ccm2/Tctn1/Stk3/Rarg/Plxnb2/Rock2/Mef2c/Lzts2/Hdac5/Lef1/Prickle1/Sostdc1/Zeb2/Cecr2/Ctsh/Hes1/Mtss1	36
GO:0001568	blood vessel development	339	-0.32275	-1.54097	0.000203402	0.00528073	0.00402965	1637	tags=24%, list=13%, signal=21%	Prdm1/Mdm2/Hs6st1/Pak4/S100a1/Pik3cg/Emc10/Ccr2/Cited2/Myh9/Gtf2i/Ndst1/Hdac7/Tcf4/Cited1/Clic4/Ctnnb1/Sp1/Lemd3/Aggf1/Pml/Arid2/Socs3/Robo1/Enpp1/Lrg1/Tab1/Vegfb/Otulin/Smarca4/Jmjd8/Nf1/Ywhaz/Ppp3r1/Ubp1/Pdpk1/Sgpl1/Ptk2b/Adipor2/Acvrl1/Nras/Plcg1/Itgb2/Eif2ak3/Dag1/Pten/Ccdc134/Sema4a/Cd93/Emilin2/Hpse/Ets1/Rapgef3/Ccm2/Rnh1/Pknox1/Flna/S1pr1/Rock2/Zmiz1/Mef2c/Lipa/Ceacam1/Jup/Rap1a/Ephb4/Mapk…	81
GO:0022604	regulation of cell morphogenesis	155	-0.353515	-1.54776	0.00274758	0.0288466	0.0220124	2488	tags=33%, list=20%, signal=27%	Msn/Diaph1/Rasal1/Pdzd8/S100a13/Cdc42se1/Stau2/Ighm/Fmnl1/Cdc42ep4/Nedd4l/Rhog/Fbxo31/Picalm/Myo9a/Fitm2/Fes/Cux1/Myh9/Larp4/Cfl1/Camk2b/Capzb/Hck/Fmnl2/Sh3glb1/Limd1/Syne3/Parvg/Ago4/Mark2/Coro1c/Ptk2b/Myl12a/Gas7/Dvl3/Cd44/F11r/Pten/Sema4a/Cyfip1/Gm14137/Tpm1/Rac1/Brwd1/Plxnb2/Arhgef18/Sparc/Rhoq/Hexb/Afdn	51
GO:0010976	positive regulation of neuron projection development	118	-0.372615	-1.54808	0.0030343	0.0306632	0.0233987	2726	tags=36%, list=22%, signal=29%	Camk1/Dvl1/Ppp2r5b/Scarb2/Fig4/Lrp6/Hspb1/Prkci/Stau2/Braf/Itgb1/Tmem30a/Twf2/Tsc2/Pum2/Abl2/Mtor/Fes/Nme2/Khdc3/Avil/Washc5/Atf1/Camk2b/Kif3c/Arsb/Clip1/Mark2/Nf1/Iqgap1/Ptk2b/Dynlt1a/Neu1/Cyfip1/Flna/Plxnb2/Ep300/Hap1/Rap1a/Creb3l2/Itpr1/Tubb2b/Afdn	43
GO:0051051	negative regulation of transport	251	-0.33433	-1.54925	0.00100498	0.0149093	0.0113771	2297	tags=27%, list=19%, signal=23%	Prkcb/Vps4b/Gsk3a/Wnk1/Jagn1/Acsl4/Sirpa/Braf/Syt11/Cnn2/Iscu/Nedd4l/Tsc2/Picalm/Irak1/Oaz1/Abca2/Mtor/Ccr2/Tnfrsf1b/Ucp2/Ufm1/Eny2/Ndfip1/Mcub/Derl3/Gnai2/Enpp1/Pfkl/Slc6a9/Nf1/Myo5a/Ppp3r1/Ankrd13d/Entpd1/Tlr9/Rab7/Ptk2b/Cbarp/Ywhaq/Ada/Rhbdf1/Madd/Pten/Abca7/Cyfip1/Ppp3ca/Ceacam1/Gsto1/Rap1a/Hadh/Prkce/Tmbim6/Rap1b/Map4k4/Pde3b/Cd36/Anxa5/Tspo/Pkig/Pacsin2/Stxbp3/Fcgr2b/Rhoq/Srebf2/Akt1/Rin3/H…	69
GO:0051047	positive regulation of secretion	179	-0.347826	-1.54964	0.0018723	0.0228746	0.0174553	2337	tags=31%, list=19%, signal=25%	Tmed10/Rapgef4/Prkcb/Vps4b/Pfkm/Acsl4/Bsg/Rgcc/Itgam/Golph3/Aacs/Acsl3/Glud1/Tmf1/Stx4a/Osbp/Rab3a/Abcg1/Bmp6/Myh9/Smad4/Myo18a/Pla2g6/Trpm4/Mpc2/P2rx7/C1qtnf12/C2cd2l/Gna11/Smpd3/Il4ra/Kcnn4/Rab7/Clasp1/Golph3l/Arrb1/Itgb2/Rab3d/Lrrc8a/Clcf1/Gnas/Rac1/Adora2a/Ep300/Ppp3ca/Pck2/Prkce/Itpr1/Cacna1i/Oxct1/S100a10/Atp13a2/Camk2n1/Fcer1g/Anxa2	55
GO:0048667	cell morphogenesis involved in neuron differentiation	267	-0.333313	-1.55401	0.000329479	0.00718686	0.0054842	2281	tags=30%, list=19%, signal=25%	Trak2/Rb1/Limk1/Apc/Spg11/Stau2/Braf/Dnm2/B4galt5/Itgb1/Map2k2/Twf2/Sema4b/Nedd4l/Top2b/Tsc2/Itga4/Fbxo31/Sipa1l1/Picalm/Abl2/Arhgap33/Golga2/Ablim1/Rab3a/Cnp/Cux1/Golga4/Ece1/Lmtk2/Smad4/Cfl1/Hexa/Camk2b/Rere/Shtn1/Spr/Robo1/Sh3glb1/Lmo4/Mark2/Pitpna/Sema7a/Fam168b/Ist1/Spast/Dip2b/Usp33/Dag1/Pten/Sema4a/Aplp2/Scrib/Cyfip1/Flot1/Mgll/Tctn1/Rac1/L1cam/Plxnb2/Rock2/Mef2c/Myo7a/Ep300/Ppp3ca/Alcam/V…	79
GO:0060348	bone development	102	-0.381947	-1.55434	0.005475	0.0448178	0.0341999	2492	tags=35%, list=20%, signal=28%	Sbds/Thbs3/Alpl/Lrp6/Fosl2/Sik3/Miga2/Slc38a10/Inppl1/Ankrd11/Cited2/Bmp6/Ltf/Por/Nab2/Ryr1/Glg1/Tapt1/Enpp1/Tyrobp/Runx2/Smpd3/Mbtps2/Ppib/Mef2d/Asxl1/Amer1/Nab1/Gnas/Rarg/Mef2c/Lipa/Mapk14/Acp5/Sparc/Anxa2	36
GO:0051261	protein depolymerization	81	-0.400261	-1.55562	0.0062427	0.0481767	0.036763	2885	tags=42%, list=24%, signal=32%	Camsap1/Capza1/Cib1/Sh3gl1/Tmod2/Eml4/Vps4b/Apc/Atxn7/Twf2/Gak/Ccdc88c/Avil/Cfl1/Capzb/Plek/Svil/Sptbn1/Cltc/Gas2l1/Clasp1/Spast/Add3/Camsap2/Sptan1/Tpm1/Tmod3/Dstn/Mical1/Mtpn/Add1/Asph/Sptb/Lima1	34
GO:0098662	inorganic cation transmembrane transport	317	-0.32809	-1.55571	0.00012624	0.00399371	0.00304754	2692	tags=35%, list=22%, signal=28%	Hspa2/Afg3l2/Itgav/Slc30a5/Oxsr1/Cacna1h/Atp6v1c2/Atp2a3/Fmr1/Cacna1e/Diaph1/Atp1a1/Tfrc/Slc39a1/Slc25a37/Prnp/Slc39a4/Kcnk6/Wnk1/Lcn2/Mmgt1/Slc39a13/Itgb1/Slc18b1/Iscu/Slc39a10/Tcirg1/Nedd4l/Atp6v1b2/Nipal3/Mcoln2/Slc20a2/G6pdx/Akap9/Atp2c1/Orai2/Atp6v1c1/Pik3cg/Fgf11/Tmem165/Ptpn22/Slc39a3/Tpcn1/Stac2/Kcnk10/Slc41a3/Ucp2/Ryr1/Mcur1/Bhlha15/P2rx4/Slc8b1/Mcub/Slc34a1/Pml/Trpm4/Fkbp1a/Zdhhc13/P2rx…	110
GO:0070371	ERK1 and ERK2 cascade	140	-0.362088	-1.55732	0.0031046	0.0310521	0.0236954	1508	tags=25%, list=12%, signal=22%	Ptpn22/Mapk3/Myh9/Rasgrp1/Ece1/Slamf1/Smad4/Gnai2/Akap12/Vegfb/Nf1/Ywhaz/Sema7a/Tlr9/Rgs14/Ptk2b/Ccr1/Arrb1/Traf7/Cd44/Prxl2c/Pten/Abca7/Clcf1/L1cam/Glipr2/Map3k12/Ceacam1/Rap1a/Tirap/Rap1b/Cd36/Scimp/Ctsh/Dusp3	35
GO:0009913	epidermal cell differentiation	81	-0.401384	-1.55999	0.0062427	0.0481767	0.036763	1610	tags=30%, list=13%, signal=26%	Nme2/Keap1/Cux1/Clic4/Pphln1/Sfn/Smarca4/Flnb/Ubn1/Alg10b/Psap/Slc4a7/Asah1/Sgpp1/Scrib/Ovol3/Cdkn1a/Rac1/Rock2/Myo7a/Ppp3ca/Slc44a4/Hes1/Plec	24
GO:0009135	purine nucleoside diphosphate metabolic process	82	-0.402098	-1.56115	0.00518372	0.0432913	0.033035	3830	tags=48%, list=31%, signal=33%	Prkag1/Insr/Tpi1/Mpi/Ier3/Prkag2/Rptor/Bad/Ppp2ca/Foxk1/Sik2/Prkaa1/Mfsd8/Nudt18/Pgam2/Git1/Pfkfb1/Pfkm/Mlst8/Cbfa2t3/Mtor/Fkrp/Zbtb7a/Pfkp/Ucp2/Enpp1/P2rx7/Pfkl/Jmjd8/Ogt/Ddit4/Entpd1/Prxl2c/Nudt9/Eno3/Ep300/Lipa/Pfkfb3/Ak3	39
GO:0009179	purine ribonucleoside diphosphate metabolic process	82	-0.402098	-1.56115	0.00518372	0.0432913	0.033035	3830	tags=48%, list=31%, signal=33%	Prkag1/Insr/Tpi1/Mpi/Ier3/Prkag2/Rptor/Bad/Ppp2ca/Foxk1/Sik2/Prkaa1/Mfsd8/Nudt18/Pgam2/Git1/Pfkfb1/Pfkm/Mlst8/Cbfa2t3/Mtor/Fkrp/Zbtb7a/Pfkp/Ucp2/Enpp1/P2rx7/Pfkl/Jmjd8/Ogt/Ddit4/Entpd1/Prxl2c/Nudt9/Eno3/Ep300/Lipa/Pfkfb3/Ak3	39
GO:0001894	tissue homeostasis	137	-0.365534	-1.56315	0.00296617	0.0302119	0.0230543	2651	tags=34%, list=22%, signal=27%	Itgav/Rpa1/Col14a1/Cd2ap/Tfrc/Acaca/Alpl/Nod2/Lrp6/Rb1/Fosl2/Vps13b/Bsg/Ank/Itgb1/Tcirg1/Fcgr4/Cln8/Ldb1/Ankrd11/Ccr2/Atf1/Ctnnb1/Prrc1/Enpp1/P2rx7/Lsr/Tpp1/Nf1/Tlr9/Rab7/Ptk2b/Ada/Rab3d/Scrib/Gnas/Rac1/Adora2a/S1pr1/Lipa/Ceacam1/Add1/Prickle1/Zeb2/Acp5/Gpr137b	46
GO:0060249	anatomical structure homeostasis	137	-0.365534	-1.56315	0.00296617	0.0302119	0.0230543	2651	tags=34%, list=22%, signal=27%	Itgav/Rpa1/Col14a1/Cd2ap/Tfrc/Acaca/Alpl/Nod2/Lrp6/Rb1/Fosl2/Vps13b/Bsg/Ank/Itgb1/Tcirg1/Fcgr4/Cln8/Ldb1/Ankrd11/Ccr2/Atf1/Ctnnb1/Prrc1/Enpp1/P2rx7/Lsr/Tpp1/Nf1/Tlr9/Rab7/Ptk2b/Ada/Rab3d/Scrib/Gnas/Rac1/Adora2a/S1pr1/Lipa/Ceacam1/Add1/Prickle1/Zeb2/Acp5/Gpr137b	46
GO:0071322	cellular response to carbohydrate stimulus	99	-0.387836	-1.56459	0.00490085	0.0417315	0.0318447	3424	tags=52%, list=28%, signal=37%	Map2k4/Ncoa6/Smad3/Pik3ca/Rptor/Prkca/Bad/Raf1/Xbp1/Dynll1/Prkaa1/Calcrl/Grk2/Gpx1/Cacna1e/Map2k3/Sidt2/Nfkb1/Prkcb/Ccdc186/Jagn1/Gclm/Aacs/Cdk16/Stx4a/Keap1/Osbp/Abcg1/Myh9/Ucp2/Usf2/Smad4/Gclc/Eny2/Rab11b/Pla2g6/Trpm4/Mpc2/C1qtnf12/C2cd2l/Smarca4/Ogt/Arrb1/Rac1/Ppp3ca/Pck2/Prkce/Map4k4/Pde3b/Oxct1/Camk2n1	51
GO:0019725	cellular homeostasis	451	-0.320593	-1.56644	1.81997e-05	0.000915809	0.000698841	2953	tags=37%, list=24%, signal=29%	Foxk1/Chp1/Slc39a6/Txnrd1/Atp6v1e1/Xbp1/Bak1/Ano6/Serpinb1a/Plaa/Rab20/Slc12a8/Dynll1/Prkaa1/Afg3l2/Itgav/Slc30a5/Tsc22d4/Cul5/Pacs2/Mapk1/Grk2/Oxsr1/Xpr1/Gpx1/Atp2a3/Fmr1/Krit1/Cacna1e/Diaph1/Atp1a1/Tfrc/Sidt2/Alpl/Pdzd8/Prnp/Wdtc1/Bag3/Tm9sf4/Prkcb/Slc39a4/Git1/Apc/Ccdc186/Wnk1/Gls/Jagn1/Pfkm/Cln6/Prdx1/Gclm/Ftl1/Ank/Lcn2/Rhot2/Txnrd3/Slc39a13/Iscu/Slc39a10/Tcirg1/Prdx4/Atp6v1b2/Picalm/Abca2/Aa…	168
GO:0046031	ADP metabolic process	80	-0.405096	-1.56694	0.00539723	0.0445295	0.0339798	3830	tags=48%, list=31%, signal=33%	Prkag1/Insr/Tpi1/Mpi/Ier3/Prkag2/Rptor/Bad/Ppp2ca/Foxk1/Sik2/Prkaa1/Mfsd8/Pgam2/Git1/Pfkfb1/Pfkm/Mlst8/Cbfa2t3/Mtor/Fkrp/Zbtb7a/Pfkp/Ucp2/Enpp1/P2rx7/Pfkl/Jmjd8/Ogt/Ddit4/Entpd1/Prxl2c/Nudt9/Eno3/Ep300/Lipa/Pfkfb3/Ak3	38
GO:0043408	regulation of MAPK cascade	334	-0.329153	-1.56713	0.000144629	0.00429126	0.0032746	1813	tags=26%, list=15%, signal=23%	Irak1/Mydgf/Abl2/Naip2/Lemd2/Ccdc88c/Pak4/Sla/Pik3cg/Ccr2/Ptpn22/Mapk3/Myh9/Irak3/Ndst1/Prdx2/Timp2/Rasgrp1/Rb1cc1/Rell1/Ece1/Ctnnb1/Slamf1/Smad4/Tlr6/Bnip2/Stk40/Gnai2/Unc5cl/Robo1/Zmynd11/P2rx7/Akap12/Tab1/Vegfb/Nf1/Ywhaz/Kcnn4/Iqgap1/Sema7a/Tlr9/Psap/Rgs14/Ptk2b/Dok2/Ccr1/Arrb1/Dvl3/Traf7/Cd44/Prxl2c/Dusp22/Tnfrsf19/Madd/Dag1/Pten/Abca7/Dusp5/Clcf1/Map4k1/Stk3/Rac1/L1cam/Glipr2/Rock2/Map3k12/M…	86
GO:0048514	blood vessel morphogenesis	284	-0.333919	-1.5672	0.000454244	0.00878511	0.0067038	1637	tags=26%, list=13%, signal=23%	Prdm1/Hs6st1/Pak4/S100a1/Pik3cg/Emc10/Ccr2/Cited2/Myh9/Gtf2i/Hdac7/Tcf4/Cited1/Clic4/Ctnnb1/Sp1/Lemd3/Aggf1/Pml/Arid2/Robo1/Enpp1/Lrg1/Vegfb/Otulin/Smarca4/Jmjd8/Nf1/Ywhaz/Ppp3r1/Ubp1/Pdpk1/Sgpl1/Ptk2b/Adipor2/Acvrl1/Nras/Plcg1/Itgb2/Eif2ak3/Dag1/Pten/Ccdc134/Sema4a/Cd93/Emilin2/Hpse/Ets1/Rapgef3/Ccm2/Rnh1/Pknox1/Flna/S1pr1/Rock2/Zmiz1/Ceacam1/Jup/Rap1a/Ephb4/Mapk14/Pde3b/Cd36/Add1/Hdac5/Adam15/M…	73
GO:0043269	regulation of monoatomic ion transport	206	-0.347218	-1.5679	0.000802207	0.0129265	0.00986405	1973	tags=30%, list=16%, signal=25%	Itgb1/Iscu/Tcirg1/Nedd4l/Cldn10/G6pdx/Mtor/Mllt6/Akap9/Pik3cg/Ccr2/Fgf11/Ptpn22/Stac2/Ucp2/Ctnnb1/P2rx4/Slc8b1/Mcub/Rab11b/Pml/Gnai2/Fkbp1a/P2rx7/Fxyd5/Slc6a9/Ehd3/Myo5a/Ppp3r1/Kcnn4/Pdpk1/Tlr9/Ptk2b/Tmem38a/Cbarp/Ccr1/Tspan13/Ywhaq/Plcg1/Selenon/Slc30a6/Rapgef3/Flna/Gnas/Adora2a/Ppp3ca/Kcnab2/Gsto1/Atp2b1/Hap1/Prkce/Plcg2/Tmbim6/Gnb2/Tspo/Itpr1/Gpd1l/Asph/Ahnak/Akt1/Hes1	61
GO:0031929	TOR signaling	140	-0.364572	-1.56801	0.00255621	0.0277315	0.0211615	3385	tags=39%, list=28%, signal=29%	Slc7a1/Usp32/Rps6kb2/Pik3ca/Rptor/Dyrk3/Nckap1l/Akt1s1/Xbp1/Usp4/Prkaa1/Mfsd8/Fbxo9/Shq1/Otud5/Rps6ka5/Gsk3a/Sik3/Slc38a9/Mlst8/Golph3/Ube2d1/Tsc2/Mtor/Mat2a/Mapk3/Prkacb/Rragc/Larp1/Gpr155/Stambpl1/Pip4p1/Ubr2/Nprl2/Ogt/Card11/Rbx1/Rhebl1/Ywhaz/Tbk1/Ddit4/Eif4ebp2/Ccdc88a/Pten/Rbx1-ps/Npc1/Rheb/Usp7/Ep300/Eif4ebp1/Lipa/Prr5/Gpat3/Akt1/Gpr137b	55
GO:1903532	positive regulation of secretion by cell	170	-0.35528	-1.56851	0.00162911	0.0204932	0.0156381	2337	tags=31%, list=19%, signal=26%	Tmed10/Rapgef4/Prkcb/Vps4b/Pfkm/Acsl4/Bsg/Rgcc/Itgam/Golph3/Aacs/Glud1/Tmf1/Stx4a/Osbp/Rab3a/Abcg1/Bmp6/Myh9/Smad4/Myo18a/Pla2g6/Trpm4/Mpc2/P2rx7/C1qtnf12/C2cd2l/Gna11/Smpd3/Il4ra/Kcnn4/Rab7/Clasp1/Golph3l/Arrb1/Itgb2/Rab3d/Lrrc8a/Clcf1/Gnas/Rac1/Adora2a/Ep300/Pck2/Prkce/Itpr1/Cacna1i/Oxct1/S100a10/Atp13a2/Camk2n1/Fcer1g/Anxa2	53
GO:0015914	phospholipid transport	54	-0.44041	-1.56956	0.0057479	0.0462251	0.0352738	2869	tags=50%, list=24%, signal=38%	Ano6/Clptm1l/Scarb2/Atp11c/Atp10d/Osbpl5/Vapa/Tmem30a/Atp11b/Abca3/Abca1/Osbp/Scarb1/Abcg1/Atp8b2/Spns1/P2rx7/C2cd2l/Osbpl2/Pitpna/Kcnn4/Prelid1/Esyt1/Pltp/Abca7/Slc66a2/Cptp	27
GO:0031346	positive regulation of cell projection organization	244	-0.339853	-1.56984	0.000296514	0.00677726	0.00517163	2763	tags=34%, list=23%, signal=27%	Dynll1/Rreb1/Brk1/Camk1/Dvl1/Ppp2r5b/Scarb2/Dock11/Ccp110/Fmr1/Atmin/Fig4/Lrp6/Limk1/Apc/Hspb1/Prkci/Stau2/Braf/Dnm2/Lcn2/Wasf2/Cdc42ep4/Itgb1/Map2k2/Tmem30a/Twf2/Tsc2/Pum2/Fbxo31/Cep120/Picalm/Abl2/Mtor/Fes/Golga2/Nme2/Khdc3/Avil/Cux1/Washc5/Golga4/Atf1/Zmynd8/Cfl1/Camk2b/Shtn1/Tapt1/Robo1/Sh3glb1/Kif3c/P2rx7/Arsb/Clip1/Mark2/Nf1/Coro1c/Mark4/Iqgap1/Sema7a/Ptk2b/Ist1/Ccdc88a/Dvl3/Septin9/Dynlt1a…	84
GO:0010817	regulation of hormone levels	242	-0.340865	-1.57297	0.000397355	0.00800914	0.00611166	2793	tags=35%, list=23%, signal=28%	Adam10/Dynll1/Cyp11a1/Pcsk4/Srebf1/Slc30a5/Sirt3/Cacna1h/Cacna1e/Atp1a1/Sidt2/Gh/Rapgef4/Nfkb1/Prkcb/Tg/Ccdc186/Dgat1/Jagn1/Pfkm/Acsl4/Hsd17b11/Stat5b/Tcirg1/Aacs/Cdk16/Rdh12/Glud1/Tmf1/Stx4a/Hmga1/Osbp/Rab3a/Plekha1/Scarb1/Abcg1/Slc7a5/Bmp6/Myh9/Ucp2/Rdh11/Ece1/Por/Smad4/Hsd11b1/Slc8b1/Eny2/Rab11b/Pla2g6/Ctsb/Trpm4/Enpp1/Mpc2/C1qtnf12/C2cd2l/Gna11/Smpd3/Hsd17b4/Pfkl/Dhrs7/Ywhaz/Myo5a/Kcnn4/Sgpl1…	85
GO:1903829	positive regulation of protein localization	332	-0.329977	-1.5744	0.00015398	0.00437836	0.00334107	2812	tags=35%, list=23%, signal=27%	Tcp1/B3gat3/Dynll1/Lgals3/Prkaa1/Camk1/Cib1/Abhd17a/Sirt3/Mapk1/Crebbp/Msn/Cd2ap/Tfrc/Dkc1/Prnp/Tmed10/Bag3/Rapgef4/Tm9sf4/Prkcb/Gsk3a/Apc/Ergic3/Pfkm/Pcnt/Acsl4/Prkci/Bsg/Syt11/Gas8/Itgam/Golph3/Cct5/Cep250/Itgb1/Tmem30a/Trim8/Rhog/Cep120/Rab29/Oaz1/Aacs/Acsl3/Glud1/Atp2c1/Stx4a/Mdm2/Osbp/Abcg1/Ptpn22/Stac2/Cnpy4/Abhd17c/Myh9/Vps28/Cfl1/Bcap31/Myo18a/Ice1/Pla2g6/Sfn/Pml/Sptbn1/Trpm4/Sorbs1/Cdk9/…	115
GO:0008360	regulation of cell shape	80	-0.407456	-1.57607	0.00480086	0.0414457	0.0316267	2488	tags=38%, list=20%, signal=30%	Msn/Diaph1/S100a13/Cdc42se1/Fmnl1/Cdc42ep4/Rhog/Fes/Myh9/Cfl1/Hck/Fmnl2/Limd1/Syne3/Parvg/Mark2/Ptk2b/Myl12a/Gas7/F11r/Sema4a/Cyfip1/Gm14137/Tpm1/Rac1/Brwd1/Plxnb2/Arhgef18/Rhoq/Hexb	30
GO:0006022	aminoglycan metabolic process	63	-0.427679	-1.57633	0.00613224	0.0477495	0.036437	3293	tags=48%, list=27%, signal=35%	Ext2/Ndst2/Ctbs/Hyal1/Xylt1/B3gat3/Chsy1/Chst3/Dse/Nfkb1/Cln6/Gns/B4galt5/Chil3/Ndst1/Hexa/Ccnd3/Galns/Arsb/Smpd3/Hs2st1/Cltc/Cd44/Gusb/Hpse/Chit1/Chst12/Chst7/B3gnt8/Hexb	30
GO:0051050	positive regulation of transport	498	-0.320393	-1.57686	1.87172e-05	0.000921771	0.000703391	2341	tags=29%, list=19%, signal=25%	Gh/Tmed10/Atad1/Bag3/Rapgef4/Tm9sf4/Prkcb/Vps4b/Gsk3a/Ehd2/Ergic3/Wnk1/Khdrbs1/Pfkm/Pcnt/Arhgef11/Acsl4/Prkci/Sirpa/Bsg/Cebpb/Braf/Dnm2/Syt11/Ighm/Lcn2/Rgcc/Itgam/Golph3/Itgb1/Tmem30a/Nedd4l/Rab29/Picalm/Oaz1/Aacs/G6pdx/Mllt6/Acsl3/Glud1/Znrf2/Akap9/Tmf1/Atp2c1/Abca3/Stx4a/Cd151/Mdm2/Abca1/Osbp/Rab3a/Abcg1/Ccr2/Ptpn22/Slc7a5/Bmp6/Stac2/Myh9/Vps28/Smad4/P2rx4/Bcap31/Myo18a/Ice1/Slc34a1/Pla2g6/Sfn/…	146
GO:0032535	regulation of cellular component size	236	-0.343047	-1.57757	0.000389397	0.00794234	0.00606069	2261	tags=29%, list=19%, signal=24%	Limk1/Baiap2l1/Wnk1/Mlst8/Dnm2/Pex11b/Cdc42ep4/Twf2/Tsc2/Pum2/Picalm/Chmp3/Mtor/Gba2/Snx9/Cln8/Avil/Slc12a9/Vav1/Washc5/Golga4/Rb1cc1/Arpc5/Cfl1/Capzb/Dnajc16/Shtn1/Plek/Svil/Sptbn1/P2rx7/Prex1/Ssh1/Ogt/Kcnn4/Sema7a/Ptk2b/Ist1/Inf2/Add3/Dip2b/Rab11a/Lrrc8a/Pten/Cyfip1/Sptan1/Rapgef3/Arpc5l/Gm14137/Tpm1/Mgll/Rac1/Ssh2/L1cam/Tmod3/Ep300/Dstn/Prkce/Gnb3/Mtpn/Add1/Atp13a2/Sptb/Myadm/Lima1/Akt1/Rin3/R…	68
GO:0098655	monoatomic cation transmembrane transport	327	-0.331961	-1.58161	0.00016715	0.00466944	0.00356318	2692	tags=35%, list=22%, signal=28%	Hspa2/Afg3l2/Itgav/Slc30a5/Oxsr1/Cacna1h/Atp6v1c2/Atp2a3/Fmr1/Cacna1e/Diaph1/Atp1a1/Tfrc/Slc39a1/Slc25a37/Prnp/Slc39a4/Kcnk6/Wnk1/Lcn2/Ano10/Mmgt1/Slc39a13/Itgb1/Slc18b1/Iscu/Slc39a10/Tcirg1/Nedd4l/Atp6v1b2/Nipal3/Mcoln2/Slc20a2/G6pdx/Akap9/Atp2c1/Orai2/Atp6v1c1/Pik3cg/Fgf11/Tmem165/Ptpn22/Slc39a3/Tpcn1/Stac2/Kcnk10/Slc41a3/Ucp2/Ryr1/Mcur1/Bhlha15/P2rx4/Slc8b1/Mcub/Slc34a1/Pml/Trpm4/Fkbp1a/Zdhhc1…	114
GO:1903828	negative regulation of protein localization	152	-0.363283	-1.58173	0.00151959	0.0196191	0.0149711	1518	tags=22%, list=12%, signal=20%	Fbxo4/Abhd17c/Ucp2/Ufm1/Eny2/Ilrun/Ndfip1/Sfn/Derl3/Cdk9/Cltc/Mark3/Pfkl/Ogt/Nf1/Ywhaz/Ppp2r5a/Coro2b/Tmbim1/Rhbdf1/Madd/Rock2/Ppp3ca/Abhd17b/Hadh/Lzts2/Trim40/Map4k4/Pde3b/Cd36/Anxa5/Pkig/Rhoq/Akt1	34
GO:0043244	regulation of protein-containing complex disassembly	95	-0.395327	-1.58667	0.00377971	0.0355427	0.0271221	2885	tags=41%, list=24%, signal=32%	Camsap1/Capza1/Fyco1/Cib1/Tbc1d25/Tmod2/Eml4/Apc/Tmem39a/Wnk1/Atxn7/Irgm2/Twf2/Scaf8/Ccdc88c/Avil/Irak3/Cfl1/Capzb/Plek/Tecpr1/Svil/Phf23/Sptbn1/Gas2l1/Clasp1/Spast/Gspt1/Add3/Camsap2/Sptan1/Tpm1/Tmod3/Dstn/Mtpn/Add1/Asph/Sptb/Lima1	39
GO:0035239	tube morphogenesis	405	-0.327126	-1.5876	1.602e-05	0.000846144	0.000645681	1637	tags=24%, list=13%, signal=21%	Prdm1/Apaf1/Hs6st1/Pak4/S100a1/Pik3cg/Emc10/Ccr2/Cited2/Prkacb/Myh9/Gtf2i/Hdac7/Tcf4/Cited1/Clic4/Ctnnb1/Bcl2l11/Smad4/Cfl1/Sp1/Lemd3/Aggf1/Stx2/Pml/Arid2/Med12/Robo1/Enpp1/Lrg1/Hs2st1/Lmo4/Vegfb/Otulin/Smarca4/Jmjd8/Nf1/Ywhaz/Ppp3r1/Ubp1/Pdpk1/Mthfd1l/Sgpl1/Ptk2b/Adipor2/Acvrl1/Nras/Plcg1/Itgb2/Cd44/Eif2ak3/Csnk2b/Dag1/Pten/Ccdc134/Sema4a/Scrib/Cd93/Emilin2/Hpse/Ets1/Rapgef3/Ccm2/Rnh1/Pknox1/Tct…	97
GO:0009611	response to wounding	251	-0.342779	-1.5884	0.000487118	0.00923398	0.00704633	2314	tags=30%, list=19%, signal=25%	Rhoc/Vps4b/Dancr/Git1/Ctnna1/Braf/Syt11/Cnn2/Itgb1/Map2k2/Max/Pum2/Chmp3/Tec/Mtor/Cd151/Hmga1/Abhd2/Txn2/Vps33b/Rab3a/Ccr2/Pear1/Myh9/Prdx2/Cd9/P2rx4/Plaur/Plek/Rap2b/Enpp1/Tyrobp/Lrg1/AI506816/Itpr3/Vegfb/Pvt1/Nf1/Cers2/Entpd1/Clasp1/St3gal4/Adipor2/Acvrl1/Mirt1/Cd44/F11r/Neat1/Dag1/Axl/Pten/Scrib/Emilin2/Hpse/Cdkn1a/Mrtfa/Tpm1/Rasa3/Flna/Gnas/Ceacam1/Prkce/Plcg2/BC004004/Eppk1/Cd36/Anxa5/Tspo/S…	76
GO:0044706	multi-multicellular organism process	92	-0.399069	-1.59245	0.00281355	0.0292818	0.0223445	2162	tags=32%, list=18%, signal=26%	Acsl4/Bsg/Stat5b/Adcy7/Ints1/Ndrg3/Mtor/Smurf2/Ube2a/Prdm1/Sp3/Cited2/Mapk3/Dcaf13/Sp1/Ctsb/Stx2/Tppp3/Exoc1/Adipor2/Slc38a1/Slc19a1/Capn2/Parp1/Acvr1b/Endou/Akt1/Dkkl1/Hexb	29
GO:0010959	regulation of metal ion transport	180	-0.358124	-1.59451	0.00044478	0.00870784	0.00664483	1730	tags=28%, list=14%, signal=25%	G6pdx/Mllt6/Akap9/Pik3cg/Fgf11/Ptpn22/Stac2/Ucp2/Ctnnb1/P2rx4/Slc8b1/Mcub/Pml/Gnai2/Fkbp1a/P2rx7/Fxyd5/Ehd3/Myo5a/Ppp3r1/Kcnn4/Pdpk1/Tlr9/Ptk2b/Tmem38a/Cbarp/Ccr1/Tspan13/Plcg1/Selenon/Slc30a6/Rapgef3/Flna/Gnas/Adora2a/Ppp3ca/Kcnab2/Gsto1/Atp2b1/Hap1/Prkce/Plcg2/Tmbim6/Gnb2/Tspo/Itpr1/Gpd1l/Asph/Ahnak/Akt1/Hes1	51
GO:1903034	regulation of response to wounding	75	-0.418545	-1.59652	0.00580177	0.0464238	0.0354254	2909	tags=41%, list=24%, signal=32%	Xbp1/Tnfrsf12a/Xylt1/Ano6/Rreb1/Ptprs/Sh2b3/Git1/Braf/Itgb1/Map2k2/Pum2/Mtor/Prdx2/Cd9/Plaur/Vegfb/Cers2/Clasp1/St3gal4/Pten/Emilin2/Hpse/Flna/Ceacam1/Prkce/Eppk1/Cd36/Anxa5/Rtn4rl1/Anxa2	31
GO:0021953	central nervous system neuron differentiation	80	-0.413026	-1.59761	0.00396594	0.0364352	0.0278032	2496	tags=34%, list=21%, signal=27%	Dubr/Scyl3/Bmpr1a/Scyl2/Spg11/B4galt5/Gba2/Cln8/Samd4b/Ldb1/Ighmbp2/Ctnnb1/Robo1/Lmo4/Atf5/Sox5/Psap/Dvl3/Pten/Tctn1/Rac1/L1cam/Ttll1/Zmiz1/Mtpn/Zeb2/Hes1	27
GO:0006631	fatty acid metabolic process	219	-0.351829	-1.59821	0.000241263	0.00600268	0.00458057	1927	tags=26%, list=16%, signal=22%	Sirt2/Acadm/Daglb/Prxl2b/Aacs/Abcd1/Acad9/Mtor/Acsl3/Scd2/Erlin2/Abhd2/Gstm1/Acoxl/Por/Faah/Acacb/Slc27a3/Elovl6/Abhd5/Gpam/Prkab2/Ptgr1/Enpp1/Echdc3/Hsd17b4/Acly/Myo5a/Amacr/Acss1/Sgpl1/Ech1/Adipor2/Eif2ak3/Asah1/Hacd3/Acox1/Mgst3/Slc25a17/Pla2g15/Crat/Mgll/Elovl1/Lipa/Ceacam1/Alox5ap/Hadh/Auh/Pck2/Prkar2b/Mapk14/Acox3/Cyp4f18/Naaa/Akt1/Acaa2	56
GO:0034976	response to endoplasmic reticulum stress	214	-0.352813	-1.59965	0.000269864	0.00644569	0.00491862	2576	tags=29%, list=21%, signal=23%	Pdia6/Dnajc3/Marchf6/Erp29/Rasgrf2/Atp2a3/Sec61b/Ecpas/Man1a/Nod2/Hyou1/Casp9/Nod1/Fbxo17/Cebpb/Bag6/Fbxo6/Foxred2/Tmem259/H13/Map3k20/Syvn1/Erlin2/Apaf1/Nploc4/Tmem33/Ubxn1/Ufm1/Bcl2l11/Bhlha15/Bcap31/Pla2g6/Pml/Derl3/Ube4a/Ufc1/Mbtps2/Tmco1/Man1b1/Rnf5/Edem3/Derl1/Ppp1r15b/Edem1/Atf6/Eif2ak3/Lpcat3/Abca7/Man1c1/Flot1/Ubxn6/Man1a2/Serinc3/Tmbim6/Creb3l2/Trim25/Grina/Itpr1/Rnf139/Fcgr2b/Sel1l/Rcn3	62
GO:0032787	monocarboxylic acid metabolic process	352	-0.333901	-1.59978	2.91797e-05	0.00131501	0.00100347	2500	tags=29%, list=21%, signal=24%	Gpx1/Dse/Tecr/Acads/Pgam2/Acaca/Wdtc1/Scd1/Git1/Pfkfb1/Dgat1/Pfkm/Acsl4/Mlst8/Hadhb/Cyp39a1/Cbfa2t3/Sirt2/Acadm/Pon3/Daglb/Hagh/Prxl2b/Aacs/Abcd1/Acad9/Mtor/Fkrp/Acsl3/Gba2/Zbtb7a/Scd2/Erlin2/Abhd2/Gstm1/Pfkp/Acoxl/Ucp2/Por/Faah/Acacb/Hexa/Slc27a3/Elovl6/Abhd5/Gpam/Prkab2/Ptgr1/Enpp1/Mpc2/P2rx7/Arsb/Echdc3/Hsd17b4/Pfkl/Jmjd8/Ogt/Acly/Myo5a/Amacr/Ddit4/Acss1/Fahd1/Mthfd1l/Sgpl1/Gamt/Ech1/Adipor2/S…	102
GO:0019751	polyol metabolic process	59	-0.43947	-1.60068	0.00436967	0.0389439	0.0297175	2253	tags=34%, list=19%, signal=28%	Isyna1/Acer3/Plpp1/Abca2/Inppl1/Fkrp/Myh9/Nudt4/Plek/Spr/Synj2/Nudt3/Plcg1/Asah1/Pten/Sgpp1/Plpp2/Pck2/Plcg2/Naaa	20
GO:0098660	inorganic ion transmembrane transport	344	-0.334449	-1.60068	0.000104778	0.00360091	0.0027478	2960	tags=38%, list=24%, signal=30%	Ywhah/Chp1/Slc39a6/Atp6v1e1/Bak1/Rangrf/Ano6/Scn4a/Slc12a8/Mfsd8/Hspa2/Afg3l2/Clcn4/Itgav/Slc30a5/Oxsr1/Cacna1h/Xpr1/Atp6v1c2/Atp2a3/Fmr1/Cacna1e/Diaph1/Atp1a1/Tfrc/Slc39a1/Slc25a37/Prnp/Slc39a4/Ttyh3/Kcnk6/Pcyox1/Wnk1/Ank/Lcn2/Ano10/Mmgt1/Tmc4/Slc39a13/Itgb1/Slc18b1/Iscu/Clcn7/Slc39a10/Tcirg1/Nedd4l/Atp6v1b2/Nipal3/Mcoln2/Slc20a2/G6pdx/Mtor/Akap9/Atp2c1/Orai2/Atp6v1c1/Slc12a9/Pik3cg/Fgf11/Tmem16…	132
GO:0001678	intracellular glucose homeostasis	101	-0.395318	-1.60175	0.00206505	0.0242974	0.018541	3265	tags=48%, list=27%, signal=35%	Ncoa6/Smad3/Pik3ca/Rptor/Bad/Raf1/Foxk1/Xbp1/Dynll1/Prkaa1/Grk2/Gpx1/Cacna1e/Sidt2/Ccdc186/Jagn1/Gclm/Aacs/Cdk16/Stx4a/Osbp/Abcg1/Myh9/Ucp2/Usf2/Smad4/Gclc/Eny2/Rab11b/Pla2g6/Trpm4/Mpc2/C1qtnf12/C2cd2l/Smarca4/Nucks1/Ogt/Arrb1/Lrrc8a/Rac1/Ppp3ca/Pck2/Prkce/Map4k4/Pde3b/Stxbp3/Oxct1/Camk2n1	48
GO:0030073	insulin secretion	122	-0.382583	-1.60248	0.00137797	0.0186053	0.0141974	2440	tags=38%, list=20%, signal=30%	Cacna1e/Sidt2/Rapgef4/Prkcb/Ccdc186/Dgat1/Jagn1/Pfkm/Acsl4/Tcirg1/Aacs/Cdk16/Glud1/Stx4a/Hmga1/Osbp/Rab3a/Abcg1/Myh9/Ucp2/Slc8b1/Eny2/Rab11b/Pla2g6/Trpm4/Mpc2/C1qtnf12/C2cd2l/Gna11/Pfkl/Myo5a/Arrb1/Lrrc8a/Gnas/Rac1/Ppp3ca/Mafa/Hadh/Pck2/Prkce/Map4k4/Pde3b/Stxbp3/Itpr1/Oxct1/Camk2n1	46
GO:0050808	synapse organization	253	-0.345572	-1.60278	0.000228231	0.00579925	0.00442533	2435	tags=31%, list=20%, signal=26%	Cd2ap/Rps6ka5/Ube2m/Prnp/Actn1/Rapgef4/Daam1/Spg11/Stau2/S1pr2/Wasf2/Itgam/Lgmn/Itgb1/Tsc2/Pum2/Rhog/Sipa1l1/Rab29/Picalm/Myo9a/Abl2/Tenm4/Arhgap33/Rab3a/Ube3b/Abhd17c/Bsn/Zmynd8/Ctnnb1/Cfl1/Camk2b/Chrnb1/Asap1/Dgkz/Sorbs1/Robo1/Ssh1/Mark2/Ogt/Nf1/Ywhaz/Myo5a/Iqgap1/Sema7a/Stau1/Crmp1/Ptk2b/Adgrl2/Iqsec2/Dag1/Pten/Zdhhc8/Sema4a/Cyfip1/Rheb/Flna/Rac1/L1cam/Plxnb2/Ppfia4/Rock2/Mef2c/Septin11/Abhd17…	79
GO:0022603	regulation of anatomical structure morphogenesis	427	-0.330806	-1.6054	1.35141e-05	0.000777792	0.000593522	2416	tags=32%, list=20%, signal=26%	Diaph1/Tfrc/Rasal1/Pdzd8/S100a13/Cdc42se1/Prkcb/Trak2/Limk1/Bmpr1a/Apc/Wnk1/Hspb1/Stau2/Pik3r6/Braf/Ighm/Lcn2/Fmnl1/Rgcc/Irgm2/Fkbpl/Cdc42ep4/Itgb1/Map2k2/Twf2/Nedd4l/Tsc2/Pum2/Rhog/Fbxo31/Sipa1l1/Picalm/Mydgf/Myo9a/Fitm2/Tenm4/Tmem135/Fes/Arhgap33/Golga2/Pak4/S100a1/Stat2/Pik3cg/Emc10/Ccr2/Cux1/Cited2/Myh9/Golga4/Gtf2i/Larp4/Tcf4/Ctnnb1/Cfl1/Camk2b/Capzb/Sp1/Aggf1/Shtn1/Pml/Hck/Fmnl2/Robo1/Sh3gl…	136
GO:0046889	positive regulation of lipid biosynthetic process	59	-0.441345	-1.60751	0.00400299	0.036703	0.0280076	3057	tags=46%, list=25%, signal=34%	Scap/Chp1/Elovl5/Srebf1/Sirt3/Mapk1/Gh/Dgat1/Mlst8/Sirt2/Abcd1/Mtor/Acsl3/Scarb1/Abcg1/Bmp6/Por/Pla2g6/Gpam/Sorbs1/Smpd3/Ogt/Cnep1r1/Capn2/Srebf2/Akt1/Abhd6	27
GO:0110020	regulation of actomyosin structure organization	59	-0.441915	-1.60958	0.00388076	0.0362078	0.0276297	2314	tags=34%, list=19%, signal=28%	Rhoc/Limk1/Braf/Wasf2/Rgcc/Mtor/Smad4/Clasp1/Coro2b/Ccdc88a/F11r/Rapgef3/Tpm1/Rac1/S1pr1/Rock2/Mef2c/Ep300/Arhgef18/S100a10	20
GO:0043954	cellular component maintenance	39	-0.477376	-1.6097	0.00599993	0.0473747	0.0361509	1973	tags=38%, list=16%, signal=32%	Itgb1/Abl2/Rab3a/Bsn/Zmynd8/Cfl1/Dgkz/Neat1/Plekha7/L1cam/Abhd17b/Prickle1/Fcgr2b/Mtss1/Afdn	15
GO:0038127	ERBB signaling pathway	72	-0.423968	-1.60975	0.00301175	0.0305459	0.0233092	2309	tags=38%, list=19%, signal=31%	Rnf115/Kif16b/Rnf126/Braf/Lgmn/Map2k2/Abl2/Socs5/Snx5/Mapk3/Plaur/Pdpk1/Iqgap1/Rab7/Ptk2b/Ptpn12/Ccdc88a/Plcg1/Rhbdf1/Hip1/Ceacam1/Hap1/Dgkd/Prickle1/Mvb12b/Akt1/Dusp3	27
GO:2000145	regulation of cell motility	494	-0.327419	-1.61108	1.31686e-06	0.000157266	0.000120007	2916	tags=35%, list=24%, signal=28%	Hyal1/Maz/Xbp1/Ano6/Cd200r1/Plaa/Ago2/Adam10/Hdac9/Lmna/Lgals3/Rreb1/Gpr183/Rnf20/Ptprj/Cib1/Prkx/Trib1/Itgav/Zfp703/Cul5/Sap130/Mapk1/Oxsr1/Ccl22/Spata13/Msn/Krit1/Diaph1/Mapre2/Map2k3/Nod2/Cd300a/Dock8/Rhoc/Rapgef4/Ctnna1/Bmpr1a/Apc/Wnk1/Hspb1/Bsg/Braf/Lcn2/S1pr2/Cnn2/Rcc2/Rgcc/Lgmn/Itgb1/Map2k2/Grb7/Stat5b/Sema4b/Nipbl/Tsc2/Itga4/Mcc/Fbxo31/Abl2/Mtor/Smurf2/Fes/Stx4a/Cd151/Abhd2/Mdm2/Ldb1/Pik3…	172
GO:0001525	angiogenesis	244	-0.348794	-1.61113	0.000141149	0.00424068	0.003236	2303	tags=32%, list=19%, signal=26%	Mfge8/Prkcb/Vps4b/Bmpr1a/C1galt1/Wnk1/Hspb1/Bsg/Pik3r6/Wasf2/Rgcc/Rasip1/Fkbpl/Itgb1/Mydgf/Hs6st1/Pak4/S100a1/Pik3cg/Emc10/Ccr2/Myh9/Gtf2i/Hdac7/Tcf4/Clic4/Ctnnb1/Sp1/Lemd3/Aggf1/Pml/Robo1/Lrg1/Vegfb/Otulin/Jmjd8/Nf1/Ywhaz/Ppp3r1/Ubp1/Pdpk1/Ptk2b/Adipor2/Acvrl1/Nras/Plcg1/Itgb2/Eif2ak3/Dag1/Pten/Ccdc134/Sema4a/Cd93/Emilin2/Hpse/Ets1/Rapgef3/Ccm2/Rnh1/Pknox1/Flna/S1pr1/Rock2/Ceacam1/Jup/Ephb4/Mapk…	78
GO:0030072	peptide hormone secretion	138	-0.377251	-1.61417	0.00145256	0.0192747	0.0147082	2440	tags=36%, list=20%, signal=29%	Cacna1e/Sidt2/Rapgef4/Prkcb/Ccdc186/Dgat1/Jagn1/Pfkm/Acsl4/Tcirg1/Aacs/Cdk16/Glud1/Stx4a/Hmga1/Osbp/Rab3a/Abcg1/Myh9/Ucp2/Slc8b1/Eny2/Rab11b/Pla2g6/Trpm4/Mpc2/C1qtnf12/C2cd2l/Gna11/Smpd3/Pfkl/Myo5a/Arrb1/Madd/Lrrc8a/Clcf1/Gnas/Rac1/Ppp3ca/Mafa/Hadh/Pck2/Prkce/Map4k4/Pde3b/Anxa5/Stxbp3/Itpr1/Oxct1/Camk2n1	50
GO:0019915	lipid storage	61	-0.440604	-1.61422	0.00307109	0.0308206	0.0235188	1919	tags=36%, list=16%, signal=31%	Stat5b/Fitm2/Tmem135/Scarb1/Abcg1/Acacb/Hexa/Abhd5/Gm2a/Enpp1/Npc2/Asxl1/Npc1/Lipa/Sqle/Cd36/Clstn3/Plin3/Plin2/Bscl2/Srebf2/Hexb	22
GO:0006935	chemotaxis	171	-0.364945	-1.61499	0.000521409	0.00969172	0.00739562	2793	tags=38%, list=23%, signal=30%	Adam10/Gbf1/Lgals3/Gpr183/Ptprj/Itgav/Bin2/Plgrkt/Mapk1/Oxsr1/Ccl22/Sbds/Nod2/Wnk1/Hspb1/Bsg/Myo9b/Itgam/Lgmn/Sema4b/Tsc2/Rhog/Ackr2/Fes/Stx4a/Pik3cg/Ccr2/Vav1/Cmtm8/Mapk3/Slamf1/P2rx4/Slc8b1/Gpsm3/Pla2g6/Trpm4/Ptgr1/Robo1/Prex1/Vegfb/Ppib/Il17ra/Sema7a/Ptk2b/Ccr1/Cxcr6/S100a4/Itgb2/Cmtm7/Sema4a/Scrib/Rac1/S1pr1/Tirap/Lsp1/St6gal1/Lef1/Tubb2b/Rtn4rl1/Rin3/Fcer1g/Plec/Dusp3/Slamf9/Pip5k1c	65
GO:0042330	taxis	171	-0.364945	-1.61499	0.000521409	0.00969172	0.00739562	2793	tags=38%, list=23%, signal=30%	Adam10/Gbf1/Lgals3/Gpr183/Ptprj/Itgav/Bin2/Plgrkt/Mapk1/Oxsr1/Ccl22/Sbds/Nod2/Wnk1/Hspb1/Bsg/Myo9b/Itgam/Lgmn/Sema4b/Tsc2/Rhog/Ackr2/Fes/Stx4a/Pik3cg/Ccr2/Vav1/Cmtm8/Mapk3/Slamf1/P2rx4/Slc8b1/Gpsm3/Pla2g6/Trpm4/Ptgr1/Robo1/Prex1/Vegfb/Ppib/Il17ra/Sema7a/Ptk2b/Ccr1/Cxcr6/S100a4/Itgb2/Cmtm7/Sema4a/Scrib/Rac1/S1pr1/Tirap/Lsp1/St6gal1/Lef1/Tubb2b/Rtn4rl1/Rin3/Fcer1g/Plec/Dusp3/Slamf9/Pip5k1c	65
GO:0030888	regulation of B cell proliferation	54	-0.453513	-1.61625	0.00310716	0.0310521	0.0236954	1089	tags=30%, list=9%, signal=27%	Tyrobp/Card11/Pkn1/Tlr9/Ticam1/Ada/Tcf3/Pten/Cd320/Clcf1/Cdkn1a/Mef2c/Tirap/Cd22/Tnfrsf13c/Fcgr2b	16
GO:0009914	hormone transport	165	-0.368093	-1.61632	0.000736477	0.0122467	0.0093453	2440	tags=34%, list=20%, signal=28%	Cacna1e/Sidt2/Rapgef4/Prkcb/Ccdc186/Dgat1/Jagn1/Pfkm/Acsl4/Tcirg1/Aacs/Cdk16/Glud1/Tmf1/Stx4a/Hmga1/Osbp/Rab3a/Abcg1/Slc7a5/Bmp6/Myh9/Ucp2/Smad4/Slc8b1/Eny2/Rab11b/Pla2g6/Trpm4/Mpc2/C1qtnf12/C2cd2l/Gna11/Smpd3/Pfkl/Ywhaz/Myo5a/Arrb1/Madd/Lrrc8a/Clcf1/Gnas/Rac1/Ppp3ca/Mafa/Hadh/Pck2/Prkce/Map4k4/Pde3b/Anxa5/Tspo/Stxbp3/Itpr1/Oxct1/Camk2n1	56
GO:0035418	protein localization to synapse	45	-0.462529	-1.6171	0.00605324	0.0474546	0.036212	2312	tags=40%, list=19%, signal=33%	Rapgef4/Git1/Hspb1/Stau2/Stx4a/Bsn/Ogt/Stau1/Rab11a/Iqsec2/Dag1/Scrib/Vps26b/Abhd17b/Rap1a/Neto2/Klc1/Clstn3	18
GO:0002790	peptide secretion	142	-0.375536	-1.61789	0.000971133	0.014452	0.0110282	2440	tags=36%, list=20%, signal=29%	Cacna1e/Sidt2/Rapgef4/Prkcb/Ccdc186/Dgat1/Jagn1/Pfkm/Acsl4/Tcirg1/Aacs/Cdk16/Glud1/Stx4a/Hmga1/Abca1/Osbp/Rab3a/Abcg1/Myh9/Ucp2/Slc8b1/Eny2/Rab11b/Pla2g6/Trpm4/Mpc2/C1qtnf12/C2cd2l/Gna11/Smpd3/Pfkl/Myo5a/Arrb1/Madd/Lrrc8a/Clcf1/Gnas/Rac1/Ppp3ca/Mafa/Hadh/Pck2/Prkce/Map4k4/Pde3b/Anxa5/Stxbp3/Itpr1/Oxct1/Camk2n1	51
GO:0009154	purine ribonucleotide catabolic process	90	-0.406035	-1.61882	0.00333261	0.0323574	0.0246915	2776	tags=37%, list=23%, signal=29%	Sik2/Prkaa1/Mfsd8/Nudt18/Pgam2/Git1/Pfkfb1/Pfkm/Mlst8/Cbfa2t3/Pde7a/Mtor/Fkrp/Zbtb7a/Pfkp/Nudt4/Ucp2/Pde4a/Enpp1/P2rx7/Pfkl/Jmjd8/Ogt/Ddit4/Entpd1/Nudt3/Ada/Prxl2c/Nudt9/Eno3/Ep300/Lipa/Pfkfb3	33
GO:0030334	regulation of cell migration	469	-0.330271	-1.61971	3.13579e-06	0.00028807	0.000219823	2916	tags=35%, list=24%, signal=28%	Hyal1/Maz/Xbp1/Ano6/Cd200r1/Plaa/Ago2/Adam10/Hdac9/Lmna/Lgals3/Rreb1/Gpr183/Rnf20/Ptprj/Cib1/Prkx/Trib1/Itgav/Zfp703/Cul5/Sap130/Mapk1/Oxsr1/Ccl22/Spata13/Msn/Krit1/Diaph1/Mapre2/Map2k3/Nod2/Cd300a/Dock8/Rhoc/Rapgef4/Bmpr1a/Apc/Wnk1/Hspb1/Bsg/Braf/Lcn2/S1pr2/Cnn2/Rcc2/Rgcc/Lgmn/Itgb1/Grb7/Stat5b/Sema4b/Nipbl/Tsc2/Itga4/Mcc/Fbxo31/Abl2/Mtor/Smurf2/Stx4a/Cd151/Abhd2/Mdm2/Ldb1/Pik3cg/Emc10/Ccr2/Ptpn…	165
GO:0071709	membrane assembly	36	-0.489288	-1.6202	0.00612125	0.0477495	0.036437	1810	tags=36%, list=15%, signal=31%	Chmp3/Stx4a/Stx2/Sptbn1/Iqgap1/Psap/Spast/Pten/Flot1/Pacsin2/S100a10/Ankle2/Anxa2	13
GO:0006195	purine nucleotide catabolic process	96	-0.403526	-1.62145	0.0021978	0.0255448	0.0194929	2776	tags=38%, list=23%, signal=29%	Sik2/Dnph1/Prkaa1/Mfsd8/Nudt18/Pgam2/Ncf2/Git1/Pfkfb1/Pfkm/Mlst8/Cbfa2t3/Pde7a/Samhd1/Mtor/Fkrp/Zbtb7a/Pfkp/Nudt4/Ucp2/Pde4a/Enpp1/P2rx7/Pfkl/Jmjd8/Ogt/Ddit4/Entpd1/Nudt3/Ada/Prxl2c/Nudt9/Eno3/Ep300/Lipa/Pfkfb3	36
GO:0007269	neurotransmitter secretion	63	-0.439929	-1.62148	0.00335313	0.0324249	0.024743	2459	tags=38%, list=20%, signal=31%	Fmr1/Cacna1e/Prkcb/Git1/Braf/Syt11/Fbxl20/Stx4a/Rab3a/Cplx2/Stx2/P2rx7/Osbpl2/Slc6a9/Nf1/Atp2a2/Efr3a/Ppt1/Scrib/Adora2a/Mef2c/Rap1a/Rap1b/Stxbp3	24
GO:0099643	signal release from synapse	63	-0.439929	-1.62148	0.00335313	0.0324249	0.024743	2459	tags=38%, list=20%, signal=31%	Fmr1/Cacna1e/Prkcb/Git1/Braf/Syt11/Fbxl20/Stx4a/Rab3a/Cplx2/Stx2/P2rx7/Osbpl2/Slc6a9/Nf1/Atp2a2/Efr3a/Ppt1/Scrib/Adora2a/Mef2c/Rap1a/Rap1b/Stxbp3	24
GO:0046879	hormone secretion	162	-0.368596	-1.62155	0.00107979	0.0155164	0.0118403	2440	tags=34%, list=20%, signal=28%	Cacna1e/Sidt2/Rapgef4/Prkcb/Ccdc186/Dgat1/Jagn1/Pfkm/Acsl4/Tcirg1/Aacs/Cdk16/Glud1/Tmf1/Stx4a/Hmga1/Osbp/Rab3a/Abcg1/Bmp6/Myh9/Ucp2/Smad4/Slc8b1/Eny2/Rab11b/Pla2g6/Trpm4/Mpc2/C1qtnf12/C2cd2l/Gna11/Smpd3/Pfkl/Ywhaz/Myo5a/Arrb1/Madd/Lrrc8a/Clcf1/Gnas/Rac1/Ppp3ca/Mafa/Hadh/Pck2/Prkce/Map4k4/Pde3b/Anxa5/Tspo/Stxbp3/Itpr1/Oxct1/Camk2n1	55
GO:0050803	regulation of synapse structure or activity	166	-0.368409	-1.62234	0.00038915	0.00794234	0.00606069	1888	tags=28%, list=16%, signal=24%	Tsc2/Pum2/Rhog/Sipa1l1/Picalm/Arhgap33/Ube3b/Abhd17c/Zmynd8/Ctnnb1/Cfl1/Camk2b/Asap1/Robo1/Mark2/Ogt/Nf1/Ywhaz/Iqgap1/Sema7a/Crmp1/Ptk2b/Adgrl2/Iqsec2/Dag1/Pten/Zdhhc8/Sema4a/Cyfip1/Rheb/Rac1/L1cam/Rock2/Mef2c/Septin11/Abhd17b/Mapk14/Clstn3/Prickle1/Dnm3/Adgre5/Fcgr2b/Sparc/Cript/Akt1/Afdn	46
GO:0006826	iron ion transport	36	-0.489948	-1.62238	0.00605973	0.0474546	0.036212	2411	tags=47%, list=20%, signal=38%	Tfrc/Slc25a37/Ftl1/Dnm2/Lcn2/Sfxn1/Mmgt1/Iscu/Mcoln2/Ltf/Lmtk2/Timd2/Rab11b/Cltc/Fth1/Slc11a2/Slc48a1	17
GO:0050807	regulation of synapse organization	165	-0.369517	-1.62258	0.000647237	0.011409	0.00870608	1888	tags=28%, list=16%, signal=24%	Tsc2/Pum2/Rhog/Sipa1l1/Picalm/Arhgap33/Ube3b/Abhd17c/Zmynd8/Ctnnb1/Cfl1/Camk2b/Asap1/Robo1/Mark2/Ogt/Nf1/Ywhaz/Iqgap1/Sema7a/Crmp1/Ptk2b/Adgrl2/Iqsec2/Dag1/Pten/Zdhhc8/Sema4a/Cyfip1/Rheb/Rac1/L1cam/Rock2/Mef2c/Septin11/Abhd17b/Mapk14/Clstn3/Prickle1/Dnm3/Adgre5/Fcgr2b/Sparc/Cript/Akt1/Afdn	46
GO:0051668	localization within membrane	465	-0.330963	-1.62258	1.89498e-06	0.000192603	0.000146972	2353	tags=29%, list=19%, signal=24%	Yif1b/Prnp/Lrp6/Atad1/Rapgef4/Tm9sf4/Git1/Frmd8/Ehd2/Wnk1/Emc2/Prkci/Vps13b/Bsg/Spg11/Ssr3/Braf/Dnm2/Bag6/Itgam/Irgm2/Snx30/Golph3/Samm50/Mmgt1/Crb3/Nme7/Micall1/Itgb1/Srp19/Gak/Tsc2/Tmem126a/Itga4/Exoc5/Rhog/Timm29/Rab29/Picalm/Acap2/Vps50/Acsl3/Tram2/Atp2c1/Stx4a/Emc10/Fcho2/Stac2/Cnpy4/Golga4/Srp9/Zmynd8/Lmtk2/Ttc7b/Rragc/Camk2b/Rab11b/Sfn/Zdhhc9/Sptbn1/Nomo1/Sorbs1/Zdhhc13/Sh3glb1/Exoc1/Flot2…	134
GO:0034101	erythrocyte homeostasis	127	-0.387362	-1.62629	0.000772123	0.0127187	0.00970549	2275	tags=31%, list=19%, signal=25%	Rb1/Selenow/Prdx1/Sfxn1/Hspa1b/Stat5b/Brd1/G6pdx/Zbtb7a/Hmga1/Ldb1/Kmt2e/Sp3/Cited2/Arid4a/Nemp1/Sp1/Smarca4/Maea/Slc1a5/Hba-a1/L3mbtl3/Klf13/Cebpg/Tcf3/Axl/Fech/Abcb10/Ets1/Pknox1/Rac1/Tmod3/Slc11a2/Mapk14/Acvr1b/Add1/Ehbp1l1/Slc48a1/Lmo2	39
GO:0045921	positive regulation of exocytosis	53	-0.45626	-1.62676	0.00430856	0.038543	0.0294117	1660	tags=26%, list=14%, signal=23%	Stx4a/Rab3a/Pla2g6/Smpd3/Il4ra/Rab7/Clasp1/Itgb2/Rab3d/Cacna1i/S100a10/Atp13a2/Fcer1g/Anxa2	14
GO:0046434	organophosphate catabolic process	152	-0.373658	-1.62691	0.000783306	0.0128586	0.00981222	2835	tags=38%, list=23%, signal=29%	Mlycd/Sik2/Dnph1/Prkaa1/Mfsd8/Nudt18/Napepld/Pgam2/Gdpd3/Ncf2/Git1/Pfkfb1/Pfkm/Mlst8/Cbfa2t3/Pde7a/Samhd1/Fitm2/Abhd12/Abcd1/Mtor/Fkrp/Zbtb7a/Pfkp/Scarb1/Cnp/Nudt4/Ucp2/Pla2g6/Pde4a/Enpp1/P2rx7/Smpd3/Pfkl/Jmjd8/Ogt/Synj2/Ddit4/Entpd1/Nudt3/Mgat1/Plcg1/Ada/Prxl2c/Nudt9/Pten/Pla2g15/Eno3/Ep300/Lipa/Idh1/Plcg2/Pfkfb3/Gpd1l/Smpdl3a/Abhd6/Upb1	57
GO:0002275	myeloid cell activation involved in immune response	56	-0.45292	-1.62782	0.00401625	0.036754	0.0280465	1663	tags=34%, list=14%, signal=29%	Fes/Stx4a/D6Wsu163e/Ccr2/Rasgrp1/Cplx2/Slamf1/Tyrobp/Il4ra/Ywhaz/Pdpk1/Ticam1/Itgb2/Sbno2/Prkce/Plcg2/Stxbp3/Lat2/Fcer1g	19
GO:0070374	positive regulation of ERK1 and ERK2 cascade	77	-0.423581	-1.62808	0.00202573	0.0241211	0.0184065	1508	tags=30%, list=12%, signal=26%	Ptpn22/Mapk3/Myh9/Rasgrp1/Slamf1/Gnai2/Akap12/Vegfb/Sema7a/Ptk2b/Ccr1/Arrb1/Cd44/Prxl2c/Pten/Abca7/Glipr2/Map3k12/Rap1a/Tirap/Rap1b/Cd36/Scimp	23
GO:1902903	regulation of supramolecular fiber organization	241	-0.35392	-1.62846	0.000192912	0.0050634	0.00386381	2425	tags=31%, list=20%, signal=25%	Washc2/Pde4dip/Eml4/Slain2/Rhoc/Rb1/Git1/Limk1/Apc/Baiap2l1/Mlst8/Atxn7/Braf/Wasf2/Rgcc/Cdc42ep4/Nme7/Hspa1b/Twf2/Mapre3/Mtor/Akap9/Gba2/Snx9/Fes/Ccdc88c/Avil/Washc5/Myh9/Arpc5/Smad4/Cfl1/Capzb/Plek/Svil/Sptbn1/Prex1/Ssh1/Clip1/Gas2l1/Clasp1/Coro2b/Ptk2b/Spast/Colgalt1/Ccdc88a/Add3/Camsap2/F11r/Cyfip1/Sptan1/Rapgef3/Arpc5l/Gm14137/Tpm1/Rnh1/Flna/Rac1/Ssh2/Tmod3/S1pr1/Rock2/Mef2c/Ep300/Dstn/Prkce/…	74
GO:0031644	regulation of nervous system process	47	-0.46138	-1.62929	0.0061731	0.0478716	0.0365302	3206	tags=60%, list=26%, signal=44%	Dicer1/Cst7/Slc25a12/Prkcz/Dvl1/Homer3/Sh3gl1/Grk2/Fmr1/Fig4/Rapgef4/S1pr2/Tenm4/Tnfrsf1b/Zmynd8/Ctsc/Ssh1/Ptk2b/Eif2ak3/Dag1/Pten/Mgll/Rock2/Rnf10/Tppp/Srebf2/Shisa8/Afdn	28
GO:0031214	biomineral tissue development	67	-0.433209	-1.62939	0.00500715	0.0424099	0.0323624	2869	tags=45%, list=24%, signal=34%	Ano6/Atraid/Lncpint/Tuft1/Sbds/Alpl/Fosl2/Bmpr1a/Cebpb/Ank/Tcirg1/Slc20a2/Fkrp/Bmp6/Ltf/Trpm4/Enpp1/P2rx7/Runx2/Smpd3/Ptk2b/Ccr1/Eif2ak3/S1pr1/Sbno2/Mef2c/Atp2b1/Prickle1/Tent5a/Mtss1	30
GO:0046165	alcohol biosynthetic process	85	-0.414826	-1.63003	0.00192972	0.0233374	0.0178085	2738	tags=34%, list=22%, signal=27%	Prkaa1/Srebf1/Mapk1/Cacna1h/Nfkb1/Isyna1/Acer3/Abca2/G6pdx/Lss/Erlin2/Hmgcs1/Abcg1/Bmp6/Srd5a3/Dhcr24/Myh9/Por/Plek/Spr/Plcg1/Asah1/Lpcat3/Lipa/Pck2/Plcg2/Srebf2/H6pd/Gpr146	29
GO:0001503	ossification	177	-0.366224	-1.63022	0.000363987	0.00769365	0.00587092	2872	tags=42%, list=24%, signal=32%	Xylt1/Ano6/Atraid/Lncpint/H3f3a/Chsy1/Lmna/Noct/Mapk1/Sun1/Sbds/Thbs3/Crim1/Alpl/Lrp6/Fosl2/Git1/Bmpr1a/Apc/Sik3/Cebpb/Ank/Hdac8/Tcirg1/Nipbl/Slc20a2/Inppl1/Fkrp/Clec11a/Ankrd11/Sp3/Hira/Mapk3/Bmp6/Ltf/Hdac7/Fstl3/Cited1/Nab2/Ryr1/Ctnnb1/Smad4/Sp1/Ifitm1/Il6st/Trpm4/Tapt1/Enpp1/Limd1/P2rx7/Runx2/Smpd3/Tmco1/Nf1/Mef2d/Ptk2b/Ccr1/Eif2ak3/Ccdc134/Nab1/Gnas/S1pr1/Sbno2/Mef2c/Ppp3ca/Atp2b1/Mapk14/Hdac…	74
GO:0061951	establishment of protein localization to plasma membrane	54	-0.457858	-1.63174	0.00245791	0.0269299	0.0205498	1706	tags=28%, list=14%, signal=24%	Acsl3/Atp2c1/Golga4/Sptbn1/Rab7/Golph3l/Rab11a/Scrib/Gga1/Nsf/Rilpl1/Rab10/Rab31/Afdn/Krt18	15
GO:0010975	regulation of neuron projection development	275	-0.348612	-1.63205	0.000125203	0.00398731	0.00304266	2416	tags=31%, list=20%, signal=25%	Diaph1/Fig4/Lrp6/Rapgef4/Trak2/Limk1/Gsk3a/Hspb1/Prkci/Stau2/Braf/Itgb1/Map2k2/Thoc2/Tmem30a/Twf2/Gak/Nedd4l/Tsc2/Pum2/Fbxo31/Sipa1l1/Rab29/Picalm/Abl2/Dgkg/Mtor/Inppl1/Fes/Arhgap33/Mdm2/Golga2/Nme2/Khdc3/Avil/Cux1/Washc5/Golga4/Atf1/Cfl1/Camk2b/Shtn1/Robo1/Sh3glb1/Kif3c/Prex1/Arsb/Clip1/Mark2/Nf1/Cers2/Iqgap1/Sema7a/Crmp1/Ptk2b/Ist1/Ccdc88a/Dip2b/Dynlt1a/Camsap2/Pten/Neu1/Cyfip1/Mylip/Flna/L1cam…	84
GO:0042391	regulation of membrane potential	166	-0.370756	-1.63267	0.000314839	0.00699528	0.005338	1747	tags=27%, list=14%, signal=24%	Abcd1/Mtor/Akap9/Tmem135/Ltf/Ucp2/Zmynd8/P2rx4/Gclc/Slc8b1/Glrx/Chrnb1/Slc34a1/Shtn1/Trpm4/P2rx7/Kcnmb3/Gna11/Ssh1/Rnf122/Ppa2/Ehd3/Kcnn4/Atp2a2/Prelid1/Ptk2b/Nup155/Pten/Flna/Adora2a/Mef2c/Ppp3ca/Kcnab2/Lipa/Jup/Piezo1/Prkce/Parp1/Cd36/Tspo/Gpd1l/Cacna1i/Kctd12/Akt1/Afdn	45
GO:0051048	negative regulation of secretion	90	-0.409808	-1.63386	0.00304282	0.0306632	0.0233987	2485	tags=37%, list=20%, signal=29%	Erp29/Fmr1/Cd300a/Vps4b/Wnk1/Jagn1/Acsl4/Braf/Syt11/Ccr2/Tnfrsf1b/Ucp2/Eny2/Gnai2/Pfkl/Nf1/Myo5a/Entpd1/Rab7/Cbarp/Ada/Rhbdf1/Madd/Ppp3ca/Ceacam1/Rap1a/Hadh/Rap1b/Map4k4/Pde3b/Anxa5/Tspo/Stxbp3	33
GO:0030258	lipid modification	126	-0.38933	-1.63435	0.00045891	0.00883958	0.00674536	2554	tags=33%, list=21%, signal=27%	Cyp4v3/Mtmr6/Acads/Fig4/Inpp5a/Plpp1/Dgat1/Hadhb/Acadm/Abcd1/Dgkg/Acad9/Mtor/Inppl1/Gba2/Acoxl/Por/Acacb/Dgkz/Pip4p1/Hsd17b4/Synj2/Dgkh/St3gal4/Ech1/Adipor2/Slc35c1/Lpcat3/Pten/Sgpp1/Acox1/Plpp2/Slc25a17/Crat/Hadh/Auh/Mapk14/Dgkd/Ggta1/Acox3/Akt1/Acaa2	42
GO:0046486	glycerolipid metabolic process	234	-0.356234	-1.63457	7.5692e-05	0.00289265	0.00220734	3083	tags=36%, list=25%, signal=27%	Abhd16a/Pgap2/Inpp5b/Acsl1/Lpin2/Lypla2/Pcyt1a/Ccnc/Pik3r5/Pip4p2/Srebf1/Slc30a5/Etnk2/Mtmr6/Napepld/Gpx1/Fig4/Gdpd3/Scd1/Inpp5a/Plpp1/Tmem68/Dgat1/Acsl4/Serinc1/Pigb/Pigc/Etnk1/Pigh/Gpaa1/Daglb/Cdk8/Fitm2/Abhd12/Dgkg/Inppl1/Acsl3/Abca3/Abhd2/Pyurf/Cdipt/Avil/Pik3cg/Scarb1/Apobr/Selenoi/Ttc7b/Pi4ka/Faah/Pla2g6/Abhd5/Gpam/Plek/Il6st/Dgkz/Cat/Sh3glb1/Pip4p1/Pip4k2b/Agpat2/Synj2/Dgkh/Cnep1r1/Plcg1/L…	84
GO:0072657	protein localization to membrane	397	-0.337536	-1.63498	1.76334e-05	0.000905753	0.000691167	2353	tags=30%, list=19%, signal=25%	Yif1b/Prnp/Lrp6/Atad1/Rapgef4/Tm9sf4/Git1/Frmd8/Ehd2/Wnk1/Emc2/Prkci/Bsg/Ssr3/Braf/Bag6/Itgam/Irgm2/Golph3/Samm50/Mmgt1/Crb3/Nme7/Micall1/Itgb1/Srp19/Gak/Tsc2/Tmem126a/Itga4/Exoc5/Rhog/Timm29/Rab29/Picalm/Acsl3/Tram2/Atp2c1/Stx4a/Emc10/Fcho2/Stac2/Cnpy4/Golga4/Srp9/Zmynd8/Ttc7b/Rragc/Camk2b/Rab11b/Sfn/Zdhhc9/Sptbn1/Nomo1/Sorbs1/Zdhhc13/Sh3glb1/Flot2/Syne3/Cltc/Ssh1/Clip1/Ehd3/Tmco1/Ogt/Stx7/Myo5a…	118
GO:0034764	positive regulation of transmembrane transport	103	-0.401024	-1.63521	0.00115486	0.0162736	0.0124182	2191	tags=35%, list=18%, signal=29%	Wnk1/Arhgef11/Prkci/Braf/Lcn2/Itgb1/Nedd4l/G6pdx/Akap9/Ccr2/Slc7a5/Stac2/P2rx4/Slc34a1/Sorbs1/P2rx7/C1qtnf12/Fxyd5/Azin1/Ehd3/Ppp3r1/Pdpk1/Adipor2/Plcg1/Slc38a1/Rapgef3/Flna/Ppp3ca/Gsto1/Hap1/Rap1a/Plcg2/Mapk14/Asph/Rhoq/Akt1	36
GO:0043542	endothelial cell migration	119	-0.393192	-1.63736	0.000845531	0.013129	0.0100185	2700	tags=36%, list=22%, signal=28%	Cib1/Prkx/Itgav/Gpx1/Krit1/Map2k3/Hspb1/Bsg/Lcn2/Rgcc/Lgmn/Itgb1/Pik3cg/Emc10/Scarb1/Myh9/Hdac7/P2rx4/Sp1/Lemd3/Robo1/Nf1/Pdpk1/Ptk2b/Acvrl1/Plcg1/Itgb2/Csnk2b/Pten/Sema4a/Ets1/Ptp4a3/Rac1/Rock2/Mef2c/Ceacam1/Jup/Fstl1/Ephb4/Hdac5/Zeb2/Sparc/Akt1	43
GO:0071375	cellular response to peptide hormone stimulus	207	-0.362692	-1.63752	0.000250119	0.00617288	0.00471044	3281	tags=40%, list=27%, signal=29%	Rps6kb2/Pik3ca/Prkca/Sos2/Raf1/Prkcz/Marcks/Cpeb2/Uso1/Lpin2/Sos1/Xbp1/Hdac9/Blvrb/Sik2/Prkaa1/Cyp11a1/Lonp1/Ptprj/Srebf1/Mapk1/Grk2/Wdtc1/Gh/Nfkb1/Prkcb/Rb1/Gsk3a/Apc/Prkci/Gpt/Stat5b/Tsc2/Max/Mtor/Inppl1/Hmga1/Mdm2/Fam114a1/Snx5/Mapk3/Ptpra/Ucp2/Ctnnb1/Cfl1/Gclc/Sp1/Gpam/Gnai2/Zfp106/Socs3/Sorbs1/Enpp1/C1qtnf12/Echdc3/Pip4k2b/Nucks1/Ogt/Myo5a/Ctsd/Pdpk1/Zbtb7b/Eif4ebp2/Pten/Cyfip1/Ass1/Gnas/Rac…	82
GO:0070372	regulation of ERK1 and ERK2 cascade	127	-0.390285	-1.63856	0.000571051	0.0104083	0.00794241	1508	tags=27%, list=12%, signal=24%	Ptpn22/Mapk3/Myh9/Rasgrp1/Ece1/Slamf1/Smad4/Gnai2/Akap12/Vegfb/Nf1/Ywhaz/Sema7a/Tlr9/Rgs14/Ptk2b/Ccr1/Arrb1/Traf7/Cd44/Prxl2c/Pten/Abca7/Clcf1/L1cam/Glipr2/Map3k12/Ceacam1/Rap1a/Tirap/Rap1b/Cd36/Scimp/Dusp3	34
GO:0090066	regulation of anatomical structure size	289	-0.349012	-1.63892	7.0032e-05	0.00274215	0.0020925	2261	tags=29%, list=19%, signal=25%	Limk1/Baiap2l1/Wnk1/Gclm/Mlst8/Dnm2/Pex11b/Cdc42ep4/Itgb1/Twf2/Tsc2/Itga4/Pum2/Picalm/Chmp3/G6pdx/Mtor/Gba2/Snx9/Cln8/Avil/Slc12a9/Vav1/Washc5/Golga4/Rb1cc1/Ece1/Arpc5/Faah/Cfl1/P2rx4/Gclc/Capzb/Dnajc16/Pla2g6/Shtn1/Plek/Svil/Sptbn1/Trpm4/P2rx7/Prex1/Smpd3/Ssh1/Ogt/Kcnn4/Sema7a/Ptk2b/Asxl1/Ist1/Inf2/Add3/Dip2b/Rab11a/Lrrc8a/Pten/Plekha7/Cyfip1/Dusp5/Sptan1/Rapgef3/Arpc5l/Gm14137/Tpm1/Mgll/Rac1/Ss…	85
GO:0055082	intracellular chemical homeostasis	379	-0.34015	-1.6401	4.3773e-06	0.000348506	0.00026594	2662	tags=35%, list=22%, signal=28%	Afg3l2/Itgav/Slc30a5/Cul5/Pacs2/Mapk1/Grk2/Xpr1/Gpx1/Atp2a3/Fmr1/Cacna1e/Diaph1/Atp1a1/Tfrc/Sidt2/Pdzd8/Prnp/Wdtc1/Tm9sf4/Prkcb/Slc39a4/Ccdc186/Wnk1/Gls/Jagn1/Cln6/Gclm/Ftl1/Lcn2/Slc39a13/Iscu/Slc39a10/Tcirg1/Atp6v1b2/Picalm/Abca2/Aacs/Cdk16/Fitm2/Atp2c1/Stx4a/Osbp/Tmem9/Abcg1/Ccr2/Tmem165/Mapk3/Bmp6/Myh9/Ucp2/Clic4/Ryr1/Usf2/Smad4/Acacb/Mcur1/Spns1/Gclc/Slc8b1/Eny2/Ndfip1/Mcub/Slc34a1/Rab11b/Pla…	132
GO:0032231	regulation of actin filament bundle assembly	58	-0.452218	-1.64262	0.00512842	0.0431116	0.0328979	2314	tags=36%, list=19%, signal=29%	Rhoc/Limk1/Braf/Wasf2/Rgcc/Mtor/Cfl1/Plek/Clasp1/Coro2b/Ccdc88a/F11r/Rapgef3/Tpm1/Flna/Rac1/S1pr1/Rock2/Arhgef18/S100a10/Mtss1	21
GO:0099003	vesicle-mediated transport in synapse	164	-0.374584	-1.64301	0.000320062	0.00703327	0.00536699	2489	tags=35%, list=20%, signal=28%	Usp46/Fmr1/Cacna1e/Eps15/Diaph1/Atad1/Eps15l1/Rapgef4/Prkcb/Git1/Braf/Dnm2/Syt11/Sh3glb2/Ap2a2/Cltb/Sirt2/Nedd4l/Fbxl20/Atp6v1b2/Picalm/Btbd9/Snx9/Ctbp1/Stx4a/Mdm2/Atp6v1c1/Rab3a/Fcho2/Bsn/Ctnnb1/Cplx2/Stx2/P2rx7/Arfgap3/Ap1s2/Osbpl2/Cltc/Ppp3r1/Synj2/Rab7/Atp2a2/Efr3a/Rab11a/Pten/Scrib/Cyfip1/Hip1/Rac1/Hap1/Rap1a/Capn2/Rap1b/Stxbp3/Dnm3/Pip5k1c/Rab3b	57
GO:0035773	insulin secretion involved in cellular response to glucose stimulus	50	-0.463721	-1.64473	0.00481882	0.0414457	0.0316267	2440	tags=48%, list=20%, signal=39%	Cacna1e/Sidt2/Ccdc186/Jagn1/Cdk16/Stx4a/Osbp/Abcg1/Myh9/Ucp2/Eny2/Rab11b/Pla2g6/Trpm4/Mpc2/C1qtnf12/C2cd2l/Arrb1/Rac1/Prkce/Map4k4/Pde3b/Oxct1/Camk2n1	24
GO:0006812	monoatomic cation transport	414	-0.340159	-1.64756	4.04124e-06	0.000338684	0.000258445	2703	tags=35%, list=22%, signal=28%	Calcrl/Hspa2/Homer3/Afg3l2/Itgav/Slc30a5/Oxsr1/Atp10d/Cacna1h/Atp6v1c2/Atp2a3/Fmr1/Cacna1e/Diaph1/Atp1a1/Tfrc/Slc39a1/Slc25a37/Prnp/Prkcb/Slc39a4/Vps4b/Kcnk6/Wnk1/Ftl1/Spg11/Dnm2/Lcn2/Ano10/Sfxn1/Mmgt1/Slc39a13/Itgb1/Slc18b1/Iscu/Slc39a10/Tcirg1/Nedd4l/Atp6v1b2/Pon3/Nipal3/Mcoln2/Slc20a2/G6pdx/Mllt6/Akap9/Atp2c1/Orai2/Atp6v1c1/Slc12a9/Pik3cg/Fgf11/Tmem165/Ptpn22/Slc39a3/Tpcn1/Stac2/Kcnk10/Ltf/Slc…	146
GO:0007416	synapse assembly	95	-0.410542	-1.64774	0.00147239	0.0193231	0.0147452	1857	tags=29%, list=15%, signal=25%	Pum2/Rhog/Sipa1l1/Rab29/Arhgap33/Ube3b/Bsn/Ctnnb1/Robo1/Ogt/Iqgap1/Crmp1/Ptk2b/Adgrl2/Iqsec2/Pten/Zdhhc8/Sema4a/Rac1/L1cam/Plxnb2/Mef2c/Clstn3/Prickle1/Dnm3/Adgre5/Cript/Afdn	28
GO:2000146	negative regulation of cell motility	156	-0.376622	-1.64941	0.000559172	0.0102737	0.00783972	1502	tags=24%, list=12%, signal=21%	Cited2/Arid4a/Myh9/Zmynd8/Clic4/Cfl1/Ifitm1/Arid2/Rap2b/Robo1/Trp53inp1/Ogt/Nf1/Cers2/Coro1c/Clasp1/Adipor2/Acvrl1/Ada/Dusp22/Csnk2b/Dag1/Pten/Emilin2/Tpm1/Rac1/Mef2c/Jup/Eppk1/Hdac5/Adam15/Zeb2/Akt1/Abhd6/Rin3/Dusp3/Afdn	37
GO:0061564	axon development	217	-0.362946	-1.6498	8.79363e-05	0.00313275	0.00239056	2281	tags=32%, list=19%, signal=26%	Trak2/Limk1/Ctnna1/Apc/Spg11/Braf/Dnm2/B4galt5/Itgb1/Map2k2/Twf2/Sema4b/Top2b/Tsc2/Itga4/Pum2/Sipa1l1/Picalm/Golga2/Ablim1/Rab3a/Cnp/Golga4/Ece1/Lmtk2/Smad4/Bhlha15/Neurod4/Shtn1/Tfap4/Robo1/Enpp1/Lmo4/Mark2/Pitpna/Cers2/Sema7a/Fam168b/Ist1/Spast/Dip2b/Dynlt1a/Camsap2/Usp33/Dag1/Pten/Sema4a/Aplp2/Cyfip1/Flot1/Mgll/Tctn1/Flna/Rac1/L1cam/Plxnb2/Mef2c/Ep300/Alcam/Vcl/Tspo/Prickle1/Rab10/Tubb2b/Vim/Z…	69
GO:0030032	lamellipodium assembly	46	-0.471323	-1.65201	0.00559416	0.0454478	0.0346806	2121	tags=37%, list=17%, signal=31%	Dnm2/Wasf2/Golph3/Itgb1/Twf2/Mtor/Avil/Ablim1/Arhgef6/Cfl1/Capzb/Ccdc88a/Cyfip1/Rac1/S1pr1/Vcl/Ablim2	17
GO:0006869	lipid transport	200	-0.366967	-1.65463	0.000132507	0.00412592	0.00314843	2651	tags=36%, list=22%, signal=29%	Itgav/Scarb2/Atp11c/Tex2/Hdlbp/Atp10d/Osbpl5/Pdzd8/Lrp6/Abcc4/Vps4b/Stard10/Vapa/Acsl4/Vps13b/Spg11/Tmem30a/Irak1/Abca2/Abcd1/Atp11b/Acsl3/Tmf1/Abca3/Abca1/Osbp/Scarb1/Apobr/Abcg1/Stard5/Bmp6/Atp8b2/Ucp2/Fabp7/Spns1/Slc27a3/Pla2g6/Dennd5b/Esyt2/Gm2a/P2rx7/Npc2/C2cd2l/Osbpl2/Slc10a3/Pitpna/Kcnn4/Osbpl9/Psap/Prelid1/Esyt1/Pltp/Lpcat3/Vps51/Zdhhc8/Cd320/Sgpp1/Npc1/Abca7/Slc25a17/Atg2a/Slc66a2/Ldlrap…	73
GO:0000902	cell morphogenesis	490	-0.3375	-1.65786	9.66557e-07	0.000131921	0.000100667	2435	tags=31%, list=20%, signal=26%	Cd2ap/Diaph1/Sidt2/Rasal1/Pdzd8/Lrp6/Actn1/S100a13/Cdc42se1/Trak2/Rb1/Fosl2/Limk1/Apc/Spg11/Stau2/Braf/Dnm2/Ighm/Myo9b/Wasf2/B4galt5/Fmnl1/Cdc42ep4/Itgb1/Map2k2/Thoc2/Twf2/Sema4b/Nedd4l/Top2b/Tsc2/Itga4/Rhog/Fbxo31/Sipa1l1/Picalm/Myo9a/Fitm2/Abl2/Fes/Arhgap33/Ccdc88c/Golga2/Ablim1/Rab3a/Fryl/Cnp/Cux1/Slc39a3/Myh9/Golga4/Larp4/Ece1/Lmtk2/Clic4/Ctnnb1/Smad4/Cfl1/Hexa/Camk2b/Capzb/Rere/Shtn1/Spr/Hck…	151
GO:0030855	epithelial cell differentiation	303	-0.351684	-1.65956	1.38305e-05	0.000782172	0.000596865	1637	tags=24%, list=13%, signal=22%	Prdm1/Ccdc88c/Nme2/Keap1/Cux1/Arid4a/Bmp6/Cited1/Clic4/Ctnnb1/Smad4/Bhlha15/Pphln1/S1pr3/Sfn/Ctsb/Plaur/Stx2/Il6st/Hsd17b4/Smarca4/Tpp1/Flnb/Ppp3r1/Pdpk1/Ubn1/Iqgap1/Tlr9/Alg10b/Psap/Asxl1/Slc4a7/Acvrl1/Asah1/F11r/Sgpp1/Scrib/Hpse/Ovol3/Cdkn1a/Rapgef3/Ccm2/Rheb/Flna/Rac1/Tagln2/S1pr1/Rarg/Rock2/Mef2c/Myo7a/Ppp3ca/Lipa/Ceacam1/Vcl/Rap1a/Pck2/Fstl1/Rap1b/Eppk1/Rilpl1/Slc44a4/Add1/Lef1/Rab10/Sostdc1…	74
GO:0006911	phagocytosis, engulfment	31	-0.516802	-1.6599	0.00545172	0.0448178	0.0341999	2623	tags=52%, list=22%, signal=41%	Ano6/Bin2/Cd300a/Sirpa/Itgam/Abca1/Myh9/Timd2/Itgb2/Abca7/Rac1/Plcg2/Cd36/Rab31/Fcgr2b/Fcer1g	16
GO:0015850	organic hydroxy compound transport	123	-0.396199	-1.65997	0.000826516	0.0130863	0.00998598	2356	tags=38%, list=19%, signal=31%	Cd300a/Lrp6/Abcc4/Prkcb/Vps4b/Vapa/Spg11/Syt11/Slc18b1/Irak1/Abca2/Tmf1/Abca3/Slc49a4/Abca1/Osbp/Rab3a/Scarb1/Abcg1/Stard5/Bmp6/Slc44a2/Slc44a1/Acacb/Npc2/Osbpl2/Smpd3/Slc10a3/Myo5a/Entpd1/Pltp/Vps51/Zdhhc8/Cd320/Npc1/Abca7/Ralbp1/Adora2a/Ldlrap1/Lipa/Ceacam1/Cd36/Tspo/Srebf2/Fcer1g/Anxa2/Rab3b	47
GO:0042063	gliogenesis	196	-0.367707	-1.66046	0.000261745	0.00637536	0.00486495	2053	tags=28%, list=17%, signal=23%	B4galt5/Itgam/Ncstn/Map2k2/Sirt2/Abca2/Abl2/Mtor/Tenm4/Fkrp/Ccr2/Cnp/Mapk3/Slc7a5/Tnfrsf1b/Ptpra/Nab2/Ctnnb1/Cd9/P2rx4/Neurod4/Il6st/Med12/Enpp1/Smarca4/Nf1/Ppp3r1/Cers2/Atf5/Sox5/Ptk2b/Dag1/Pten/Scrib/Clcf1/Rheb/Nab1/Adora2a/Zmiz1/Rnf10/Mxra8/Tspo/Pfkfb3/Lef1/Tppp/Vim/Zeb2/Akt1/Ndrg1/Sun2/Hes1/Plec/Hexb/Afdn	54
GO:0007409	axonogenesis	184	-0.370653	-1.66138	0.000347073	0.00743245	0.0056716	2711	tags=36%, list=22%, signal=28%	Ptprj/Dvl1/Afg3l2/Ptprs/Raph1/Dubr/Cd2ap/Diaph1/Trak2/Limk1/Apc/Spg11/Braf/Dnm2/B4galt5/Itgb1/Map2k2/Twf2/Sema4b/Top2b/Tsc2/Itga4/Sipa1l1/Picalm/Golga2/Ablim1/Rab3a/Cnp/Golga4/Ece1/Lmtk2/Smad4/Shtn1/Robo1/Lmo4/Mark2/Pitpna/Sema7a/Fam168b/Ist1/Spast/Dip2b/Usp33/Dag1/Pten/Sema4a/Aplp2/Cyfip1/Flot1/Mgll/Tctn1/Rac1/L1cam/Plxnb2/Mef2c/Ep300/Alcam/Vcl/Prickle1/Rab10/Tubb2b/Vim/Zeb2/Tubb3/Rtn4rl1/Pip5k1c	66
GO:0032868	response to insulin	194	-0.367961	-1.66202	0.000186962	0.00496175	0.00378624	3281	tags=41%, list=27%, signal=30%	Rps6kb2/Pik3ca/Prkca/Sos2/Raf1/Prkcz/Marcks/Scap/Cpeb2/Uso1/Lpin2/Sos1/Xbp1/Hdac9/Blvrb/Sik2/Prkaa1/Lonp1/Ptprj/Srebf1/Mapk1/Grk2/Cd2ap/Alpl/Wdtc1/Gh/Prkcb/Rb1/Gsk3a/Pfkfb1/Apc/Prkci/Gpt/Tnfsf10/Tsc2/Max/Mtor/Inppl1/Hmga1/Snx5/Mapk3/Ptpra/Ucp2/Cited1/Gclc/Sp1/Gpam/Gnai2/Cat/Zfp106/Socs3/Sorbs1/Enpp1/C1qtnf12/Echdc3/Pip4k2b/Nucks1/Ogt/Myo5a/Ctsd/Pdpk1/Zbtb7b/Eif4ebp2/Pten/Cyfip1/Eif4ebp1/Ceacam1/A…	79
GO:0042058	regulation of epidermal growth factor receptor signaling pathway	41	-0.48443	-1.66289	0.006382	0.0490141	0.037402	1673	tags=44%, list=14%, signal=38%	Sos1/Rala/Ptprj/Rnf115/Rnf126/Socs5/Snx5/Plaur/Rab7/Ptpn12/Ccdc88a/Rhbdf1/Hip1/Ceacam1/Hap1/Dgkd/Mvb12b/Dusp3	18
GO:0019216	regulation of lipid metabolic process	200	-0.369123	-1.66435	0.000114401	0.00382163	0.00291623	1927	tags=27%, list=16%, signal=23%	Sirt2/Stat5b/Daglb/Abca2/Cdk8/Fitm2/Abcd1/Mtor/Acsl3/Abca3/Erlin2/Avil/Pik3cg/Scarb1/Abcg1/Bmp6/Por/Acacb/Pla2g6/Abhd5/Gpam/Sorbs1/Fmo5/Lsr/Smpd3/Ogt/Cers2/Ppp2r5a/Psap/Cnep1r1/Zfp69/Eif2ak3/Asah1/Lpcat3/Abca7/Paqr4/Idh1/Ceacam1/Prkce/Plcg2/Capn2/Pde3b/Gnb3/Tspo/Clstn3/Endou/Golm1/Bscl2/Srebf2/Akt1/Abhd6/Dkkl1/H6pd/Gpr146	54
GO:0010632	regulation of epithelial cell migration	44	-0.478409	-1.66463	0.00283601	0.0293239	0.0223766	1035	tags=32%, list=9%, signal=29%	Arsb/Coro1c/Clasp1/Plcg1/Rab11a/Pten/Scrib/Glipr2/Prkce/Plcg2/Eppk1/Map4k4/Vim/Ctsh	14
GO:0099504	synaptic vesicle cycle	130	-0.394337	-1.66484	0.000251981	0.00617288	0.00471044	2697	tags=38%, list=22%, signal=30%	Dvl1/Ap3s1/Sh3gl1/Fmr1/Cacna1e/Diaph1/Eps15l1/Rapgef4/Prkcb/Git1/Braf/Dnm2/Syt11/Ap2a2/Cltb/Fbxl20/Atp6v1b2/Picalm/Btbd9/Snx9/Ctbp1/Stx4a/Atp6v1c1/Rab3a/Fcho2/Bsn/Ctnnb1/Cplx2/Stx2/P2rx7/Ap1s2/Osbpl2/Cltc/Ppp3r1/Synj2/Rab7/Atp2a2/Efr3a/Pten/Scrib/Cyfip1/Rac1/Rap1a/Capn2/Rap1b/Stxbp3/Dnm3/Pip5k1c/Rab3b	49
GO:1903169	regulation of calcium ion transmembrane transport	94	-0.415609	-1.66499	0.000937147	0.0141222	0.0107765	1555	tags=33%, list=13%, signal=29%	Pik3cg/Ptpn22/Stac2/Ucp2/P2rx4/Mcub/Pml/Fkbp1a/P2rx7/Ehd3/Myo5a/Ppp3r1/Kcnn4/Pdpk1/Tlr9/Ptk2b/Tmem38a/Cbarp/Tspan13/Plcg1/Selenon/Rapgef3/Ppp3ca/Gsto1/Hap1/Prkce/Plcg2/Tmbim6/Asph/Ahnak/Akt1	31
GO:0010256	endomembrane system organization	384	-0.345763	-1.6654	2.49187e-06	0.000238074	0.000181671	2236	tags=29%, list=18%, signal=25%	Baiap2l1/Ehd2/Vapa/Wnk1/Jagn1/Emc2/Vps13b/Dnm2/Syt11/Bag6/Golph3/Mmgt1/Micall1/Map2k2/Plekhm2/Rfx2/Gak/Atl2/Hps3/Tmed7/Rab29/Chmp3/Dnajc13/Rtn3/Lman1/Tmem43/Abcd1/Tram2/Rab5b/Tmed9/Akap9/Tmf1/Lemd2/Snx9/Stx4a/Golga2/Nploc4/Abca1/Vps33b/Tmem33/Osbp/Rab3a/Tmem9/Emc10/Abcg1/Mapk3/Nemp1/Washc5/Atp8b2/Myh9/Cplx2/Cd9/Bhlha15/Myo18a/Lemd3/Shtn1/Stx2/Asap1/Sptbn1/Cog2/Nomo1/Esyt2/Sh3glb1/P2rx7/Ap1s2/Exoc…	113
GO:0015833	peptide transport	148	-0.384198	-1.66643	0.000440676	0.008663	0.00661062	2440	tags=36%, list=20%, signal=30%	Cacna1e/Sidt2/Rapgef4/Prkcb/Ccdc186/Dgat1/Jagn1/Pfkm/Acsl4/Tcirg1/Aacs/Cdk16/Glud1/Stx4a/Hmga1/Tap2/Abca1/Mfsd1/Osbp/Rab3a/Abcg1/Myh9/Ucp2/Slc8b1/Eny2/Rab11b/Pla2g6/Trpm4/Mpc2/C1qtnf12/C2cd2l/Gna11/Smpd3/Pfkl/Myo5a/Arrb1/Madd/Lrrc8a/Clcf1/Gnas/Rac1/Ppp3ca/Mafa/Hadh/Pck2/Prkce/Map4k4/Pde3b/Anxa5/Stxbp3/Itpr1/Oxct1/Slc15a3/Camk2n1	54
GO:0048678	response to axon injury	46	-0.475642	-1.66714	0.00481637	0.0414457	0.0316267	2255	tags=37%, list=19%, signal=30%	Ctnna1/Braf/Map2k2/Max/Pum2/Txn2/P2rx4/Enpp1/Tyrobp/Cers2/Dag1/Axl/Pten/Flna/Plcg2/Tspo/Rtn4rl1	17
GO:0046209	nitric oxide metabolic process	56	-0.463988	-1.6676	0.00245586	0.0269299	0.0205498	1355	tags=29%, list=11%, signal=26%	Por/P2rx4/Tlr6/Spr/Smpd3/Ticam1/Ptk2b/Itgb2/Ass1/Mtarc2/Rac1/Rock2/Cd36/Tspo/Acp5/Akt1	16
GO:0060135	maternal process involved in female pregnancy	31	-0.519401	-1.66824	0.00508624	0.0429275	0.0327574	2592	tags=48%, list=21%, signal=38%	Mapk1/Kpna6/Bsg/Adcy7/Ndrg3/Mtor/Ube2a/Prdm1/Cited2/Mapk3/Dcaf13/Ctsb/Tppp3/Parp1/Akt1	15
GO:0006809	nitric oxide biosynthetic process	54	-0.468299	-1.66895	0.00153056	0.0196863	0.0150224	1355	tags=30%, list=11%, signal=26%	Por/P2rx4/Tlr6/Spr/Smpd3/Ticam1/Ptk2b/Itgb2/Ass1/Mtarc2/Rac1/Rock2/Cd36/Tspo/Acp5/Akt1	16
GO:1903510	mucopolysaccharide metabolic process	48	-0.47048	-1.66902	0.00535557	0.0443389	0.0338344	2916	tags=44%, list=24%, signal=33%	Hyal1/Xylt1/Chsy1/Chst3/Dse/Nfkb1/Gns/Ndst1/Hexa/Ccnd3/Galns/Arsb/Smpd3/Hs2st1/Cltc/Cd44/Gusb/Hpse/Chst12/Chst7/Hexb	21
GO:0043502	regulation of muscle adaptation	65	-0.448004	-1.66919	0.00283371	0.0293239	0.0223766	1730	tags=34%, list=14%, signal=29%	G6pdx/Mtor/Fbxo32/Tnfrsf1b/Ctdp1/Ece1/Smad4/Acacb/P2rx4/Cdk9/Kcnn4/Atp2a2/Selenon/Dag1/Trip10/Rock2/Mef2c/Ep300/Ppp3ca/Yy1/Parp1/Mtpn	22
GO:0046460	neutral lipid biosynthetic process	33	-0.512745	-1.6693	0.00381336	0.0357185	0.0272563	3049	tags=52%, list=25%, signal=39%	Acsl1/Lpin2/Srebf1/Plpp1/Tmem68/Dgat1/Acsl4/Daglb/Fitm2/Avil/Scarb1/Gpam/Agpat2/Cnep1r1/Pla2g15/Pck2/Gpat3	17
GO:0046463	acylglycerol biosynthetic process	33	-0.512745	-1.6693	0.00381336	0.0357185	0.0272563	3049	tags=52%, list=25%, signal=39%	Acsl1/Lpin2/Srebf1/Plpp1/Tmem68/Dgat1/Acsl4/Daglb/Fitm2/Avil/Scarb1/Gpam/Agpat2/Cnep1r1/Pla2g15/Pck2/Gpat3	17
GO:0007611	learning or memory	137	-0.390601	-1.67035	0.000454102	0.00878511	0.0067038	2679	tags=34%, list=22%, signal=26%	Atxn1/Tmod2/Crebbp/Cacna1e/Prnp/Atad1/Git1/Pirb/Vps13b/Spg11/Braf/Syt11/Lcn2/Lgmn/Ncstn/Itgb1/Picalm/Btbd9/Abl2/Mtor/Glud1/Cln8/Cic/Pla2g6/Trpm4/Gm2a/Rcan1/Ap1s2/Itpr3/Nf1/Eif4ebp2/Rgs14/Uba6/Ppt1/Man2b1/Pten/Abca7/Rapgef3/Itga8/Zfp385a/Mef2c/Ep300/Slc11a2/Prkar2b/Clstn3/Camk2n1	46
GO:1901019	regulation of calcium ion transmembrane transporter activity	33	-0.513167	-1.67067	0.00375235	0.0354159	0.0270254	1469	tags=36%, list=12%, signal=32%	Stac2/Fkbp1a/Ehd3/Myo5a/Tlr9/Cbarp/Selenon/Gsto1/Hap1/Plcg2/Asph/Ahnak	12
GO:0051588	regulation of neurotransmitter transport	45	-0.477918	-1.67091	0.00372739	0.0352589	0.0269056	2459	tags=40%, list=20%, signal=32%	Dvl1/Fmr1/Cacna1e/Prkcb/Git1/Braf/Itgb1/Fbxl20/Rab3a/P2rx7/Nf1/Atp2a2/Flot1/Adora2a/Mef2c/Rap1a/Rap1b/Rab3b	18
GO:0006695	cholesterol biosynthetic process	40	-0.492671	-1.67102	0.00409146	0.0371576	0.0283545	1730	tags=35%, list=14%, signal=30%	Prkaa1/Srebf1/Mapk1/G6pdx/Lss/Erlin2/Hmgcs1/Abcg1/Dhcr24/Por/Lpcat3/Lipa/Srebf2/Gpr146	14
GO:1902653	secondary alcohol biosynthetic process	40	-0.492671	-1.67102	0.00409146	0.0371576	0.0283545	1730	tags=35%, list=14%, signal=30%	Prkaa1/Srebf1/Mapk1/G6pdx/Lss/Erlin2/Hmgcs1/Abcg1/Dhcr24/Por/Lpcat3/Lipa/Srebf2/Gpr146	14
GO:0034220	monoatomic ion transmembrane transport	369	-0.348	-1.67469	1.99998e-06	0.00019904	0.000151884	2662	tags=36%, list=22%, signal=29%	Afg3l2/Clcn4/Itgav/Slc30a5/Oxsr1/Cacna1h/Atp6v1c2/Atp2a3/Fmr1/Cacna1e/Diaph1/Atp1a1/Tfrc/Slc39a1/Slc25a37/Prnp/Slc39a4/Ttyh3/Kcnk6/Pcyox1/Wnk1/Lcn2/Ano10/Sfxn1/Mmgt1/Tmc4/Slc39a13/Itgb1/Slc18b1/Iscu/Clcn7/Slc39a10/Tcirg1/Nedd4l/Atp6v1b2/Nipal3/Mcoln2/Slc20a2/G6pdx/Mtor/Akap9/Atp2c1/Orai2/Atp6v1c1/Slc12a9/Pik3cg/Ccr2/Fgf11/Tmem165/Ptpn22/Slc39a3/Tpcn1/Stac2/Kcnk10/Slc41a3/Ucp2/Clic4/Ryr1/Mcur1/Bhl…	132
GO:0009261	ribonucleotide catabolic process	94	-0.418042	-1.67474	0.000806385	0.0129265	0.00986405	2776	tags=36%, list=23%, signal=28%	Sik2/Prkaa1/Mfsd8/Nudt18/Pgam2/Git1/Pfkfb1/Pfkm/Mlst8/Cbfa2t3/Pde7a/Mtor/Fkrp/Zbtb7a/Pfkp/Nudt4/Ucp2/Pde4a/Enpp1/P2rx7/Pfkl/Jmjd8/Ogt/Ddit4/Entpd1/Nudt3/Ada/Prxl2c/Nudt9/Eno3/Ep300/Lipa/Pfkfb3/Upb1	34
GO:0003018	vascular process in circulatory system	87	-0.424348	-1.6769	0.000666567	0.0117066	0.00893313	2011	tags=31%, list=17%, signal=26%	Abcg3/Itgb1/Itga4/G6pdx/Bmp6/Ece1/Faah/P2rx4/Gclc/Pla2g6/Trpm4/Akap12/Smpd3/Slc1a5/Add3/Plekha7/Dusp5/Mgll/Ptp4a3/Adora2a/Rock2/Ceacam1/Atp2b1/Cd36/Zeb2/Akt1/Plec	27
GO:0007188	adenylate cyclase-modulating G protein-coupled receptor signaling pathway	57	-0.462614	-1.67774	0.00198838	0.0239861	0.0183034	2312	tags=46%, list=19%, signal=37%	Rapgef4/Gsk3a/S1pr2/Prkar2a/Grk5/Adcy7/Nme2/Abca1/Prkacb/S1pr3/Pde4a/Gnai2/Gnai3/Akap12/Gna11/Psap/Adgre1/Adgrl2/Flna/Gnas/Adora2a/S1pr1/S1pr4/Prkar2b/Adgre5/Gpr146	26
GO:1901879	regulation of protein depolymerization	61	-0.458084	-1.67826	0.00139251	0.0186855	0.0142587	2885	tags=48%, list=24%, signal=36%	Camsap1/Capza1/Cib1/Tmod2/Eml4/Apc/Atxn7/Twf2/Ccdc88c/Avil/Cfl1/Capzb/Plek/Svil/Sptbn1/Gas2l1/Clasp1/Spast/Add3/Camsap2/Sptan1/Tpm1/Tmod3/Dstn/Mtpn/Add1/Asph/Sptb/Lima1	29
GO:0006836	neurotransmitter transport	80	-0.434234	-1.67964	0.0011294	0.0160093	0.0122164	2459	tags=36%, list=20%, signal=29%	Fmr1/Cacna1e/Prkcb/Git1/Braf/Syt11/Itgb1/Slc18b1/Fbxl20/Cln8/Stx4a/Rab3a/Cplx2/Stx2/P2rx7/Osbpl2/Slc6a9/Nf1/Atp2a2/Efr3a/Ppt1/Scrib/Flot1/Adora2a/Mef2c/Rap1a/Rap1b/Stxbp3/Rab3b	29
GO:0061178	regulation of insulin secretion involved in cellular response to glucose stimulus	44	-0.483084	-1.6809	0.00241586	0.0267763	0.0204326	1779	tags=50%, list=15%, signal=43%	Cacna1e/Sidt2/Jagn1/Cdk16/Stx4a/Osbp/Abcg1/Myh9/Ucp2/Eny2/Pla2g6/Trpm4/Mpc2/C1qtnf12/C2cd2l/Arrb1/Rac1/Prkce/Map4k4/Pde3b/Oxct1/Camk2n1	22
GO:0034446	substrate adhesion-dependent cell spreading	51	-0.471969	-1.68207	0.00468226	0.0407417	0.0310894	2122	tags=39%, list=17%, signal=33%	Rreb1/Cib1/Itgav/Braf/Dnm2/Rcc2/Itga4/Cass4/Prex1/Parvg/Coro1c/Actn4/Axl/Itga8/Flna/Rac1/St6gal1/S100a10/Myadm/Itgb7	20
GO:0042886	amide transport	175	-0.379228	-1.68226	0.000184964	0.00493615	0.00376671	2316	tags=36%, list=19%, signal=30%	Abcc4/Rapgef4/Prkcb/Vapa/Ccdc186/Dgat1/Jagn1/Pfkm/Acsl4/Tcirg1/Abca2/Aacs/Cdk16/Abcd1/Glud1/Stx4a/Hmga1/Tap2/Abca1/Mfsd1/Osbp/Rab3a/Abcg1/Myh9/Ucp2/Slc8b1/Eny2/Rab11b/Pla2g6/Trpm4/Mpc2/C1qtnf12/C2cd2l/Gna11/Smpd3/Pfkl/Myo5a/Psap/Arrb1/Pltp/Madd/Lrrc8a/Slc33a1/Sgpp1/Clcf1/Slc25a17/Gnas/Rac1/Ppp3ca/Mafa/Hadh/Cptp/Pck2/Slc19a1/Prkce/Map4k4/Pde3b/Anxa5/Stxbp3/Itpr1/Oxct1/Slc15a3/Camk2n1	63
GO:0099024	plasma membrane invagination	37	-0.504821	-1.68263	0.00276094	0.0288665	0.0220276	3180	tags=57%, list=26%, signal=42%	Nckap1l/Rhoa/Snx18/Ano6/Bin2/Alkbh4/Cd300a/Sirpa/Itgam/Snx9/Abca1/Myh9/Timd2/Itgb2/Abca7/Rac1/Plcg2/Cd36/Rab31/Fcgr2b/Fcer1g	21
GO:0050905	neuromuscular process	83	-0.429831	-1.68287	0.00164994	0.020687	0.015786	1752	tags=31%, list=14%, signal=27%	Abl2/Mtor/Fkrp/Cln8/Ighmbp2/Stac2/Fabp7/Hexa/Camk2b/Chrnb1/Spr/Gm2a/Ap1s2/Xrcc1/Tpp1/Myo5a/Psap/Pten/Aplp2/Tnni2/Adora2a/Myo7a/Kcnab2/Parp1/Itpr1/Hexb	26
GO:0040013	negative regulation of locomotion	162	-0.382607	-1.6832	0.000408846	0.00820613	0.00626199	1502	tags=24%, list=12%, signal=21%	Cited2/Arid4a/Myh9/Zmynd8/Clic4/Cfl1/Ifitm1/Arid2/Rap2b/Ptgr1/Robo1/Trp53inp1/Ogt/Nf1/Cers2/Coro1c/Clasp1/Adipor2/Acvrl1/Ada/Dusp22/Csnk2b/Dag1/Pten/Emilin2/Tpm1/Rac1/Mef2c/Jup/Eppk1/Hdac5/Adam15/St6gal1/Zeb2/Akt1/Abhd6/Rin3/Dusp3/Afdn	39
GO:0010324	membrane invagination	44	-0.484577	-1.6861	0.00229582	0.0262018	0.0199942	3180	tags=52%, list=26%, signal=39%	Nckap1l/Rhoa/Snx18/Ano6/Bin2/Alkbh4/Cd300a/Sirpa/Syt11/Itgam/Snx9/Abca1/Fcho2/Myh9/Timd2/Itgb2/Abca7/Rac1/Plcg2/Cd36/Rab31/Fcgr2b/Fcer1g	23
GO:0010876	lipid localization	240	-0.366416	-1.68759	5.39446e-05	0.00218384	0.00166646	2657	tags=37%, list=22%, signal=29%	Srebf1/Itgav/Scarb2/Atp11c/Tex2/Hdlbp/Atp10d/Osbpl5/Pdzd8/Lrp6/Abcc4/Vps4b/Stard10/Vapa/Dgat1/Acsl4/Vps13b/Spg11/Tmem30a/Stat5b/Irak1/Abca2/Fitm2/Abcd1/Atp11b/Acsl3/Tmem135/Tmf1/Abca3/Abca1/Osbp/Scarb1/Apobr/Abcg1/Stard5/Bmp6/Atp8b2/Ucp2/Acacb/Fabp7/Spns1/Hexa/Slc27a3/Pla2g6/Abhd5/Dennd5b/Esyt2/Gm2a/Enpp1/P2rx7/Npc2/C2cd2l/Osbpl2/Slc10a3/Pitpna/Kcnn4/Osbpl9/Psap/Prelid1/Asxl1/Esyt1/Pltp/Lpcat3/Vp…	88
GO:0032965	regulation of collagen biosynthetic process	18	-0.593275	-1.68882	0.00513513	0.0431116	0.0328979	497	tags=33%, list=4%, signal=32%	Rapgef3/Ep300/Rap1a/Acvr1b/Vim/Il6ra	6
GO:0051046	regulation of secretion	319	-0.356161	-1.68993	5.45052e-06	0.000400572	0.000305671	2485	tags=32%, list=20%, signal=26%	Erp29/Fmr1/Cacna1e/Cd2ap/Sidt2/Cd300a/Tmed10/Rapgef4/Prkcb/Vps4b/Git1/Wnk1/Jagn1/Pfkm/Acsl4/Bsg/Braf/Syt11/Rgcc/Itgam/Golph3/Tcirg1/Fbxl20/Aacs/Cdk16/Acsl3/Glud1/Tmf1/Fes/Stx4a/D6Wsu163e/Osbp/Rab3a/Abcg1/Ccr2/Bmp6/Tnfrsf1b/Myh9/Ucp2/Smad4/Myo18a/Slc8b1/Eny2/Pla2g6/Gnai2/Trpm4/Mpc2/P2rx7/C1qtnf12/C2cd2l/Gna11/Smpd3/Pfkl/Il4ra/Nf1/Myo5a/Kcnn4/Pdpk1/Entpd1/Rab7/Clasp1/Atp2a2/Cbarp/Golph3l/Arrb1/Itgb…	101
GO:0030336	negative regulation of cell migration	148	-0.389623	-1.68996	0.000272813	0.00645162	0.00492314	1502	tags=24%, list=12%, signal=22%	Cited2/Arid4a/Myh9/Zmynd8/Clic4/Ifitm1/Arid2/Rap2b/Robo1/Trp53inp1/Ogt/Nf1/Cers2/Coro1c/Clasp1/Adipor2/Acvrl1/Ada/Dusp22/Csnk2b/Dag1/Pten/Emilin2/Tpm1/Rac1/Mef2c/Jup/Eppk1/Hdac5/Adam15/Zeb2/Akt1/Abhd6/Rin3/Dusp3/Afdn	36
GO:0032956	regulation of actin cytoskeleton organization	199	-0.375285	-1.6902	8.16075e-05	0.00302322	0.00230698	2314	tags=31%, list=19%, signal=25%	Rhoc/Limk1/Baiap2l1/Stau2/Mlst8/Braf/Wasf2/Rgcc/Arap2/Cdc42ep4/Twf2/Rhog/Naa20/Mtor/Gba2/Snx9/Avil/Washc5/Rhof/Myh9/Arpc5/Smad4/Cfl1/Capzb/Plek/Svil/Sptbn1/Hck/Prex1/Ssh1/Clasp1/Coro2b/Ptk2b/Ccdc88a/Add3/F11r/Cyfip1/Sptan1/Rapgef3/Arpc5l/Gm14137/Tpm1/Rnh1/Flna/Rac1/Ssh2/Tmod3/S1pr1/Rock2/Mef2c/Ep300/Dstn/Prkce/Arhgef18/Mtpn/Add1/S100a10/Sptb/Myadm/Lima1/Mtss1	61
GO:0110053	regulation of actin filament organization	166	-0.384033	-1.69114	0.000111412	0.00377457	0.00288032	2314	tags=31%, list=19%, signal=26%	Rhoc/Limk1/Baiap2l1/Mlst8/Braf/Wasf2/Rgcc/Cdc42ep4/Twf2/Mtor/Gba2/Snx9/Avil/Washc5/Myh9/Arpc5/Cfl1/Capzb/Plek/Svil/Sptbn1/Prex1/Ssh1/Clasp1/Coro2b/Ptk2b/Ccdc88a/Add3/F11r/Cyfip1/Sptan1/Rapgef3/Arpc5l/Gm14137/Tpm1/Rnh1/Flna/Rac1/Ssh2/Tmod3/S1pr1/Rock2/Dstn/Prkce/Arhgef18/Mtpn/Add1/S100a10/Sptb/Myadm/Lima1/Mtss1	52
GO:1901890	positive regulation of cell junction assembly	39	-0.501856	-1.69225	0.00225787	0.0260527	0.0198805	1419	tags=33%, list=12%, signal=30%	Myh9/Cfl1/Iqgap1/Acvrl1/Adgrl2/Iqsec2/Sema4a/Flot1/Rac1/Map4k4/Clstn3/S100a10/Adgre5	13
GO:0014044	Schwann cell development	25	-0.55265	-1.69293	0.00553082	0.0450866	0.034405	3206	tags=56%, list=26%, signal=41%	Dicer1/Raf1/Sos1/Mapk1/Map2k2/Sirt2/Mapk3/Med12/Nf1/Ppp3r1/Dag1/Akt1/Ndrg1/Plec	14
GO:0043410	positive regulation of MAPK cascade	224	-0.372134	-1.69502	5.11121e-05	0.00208686	0.00159245	1813	tags=29%, list=15%, signal=26%	Irak1/Mydgf/Abl2/Naip2/Ccdc88c/Pik3cg/Ccr2/Ptpn22/Mapk3/Myh9/Ndst1/Prdx2/Timp2/Rasgrp1/Rb1cc1/Rell1/Ctnnb1/Slamf1/Tlr6/Bnip2/Gnai2/Unc5cl/Robo1/P2rx7/Akap12/Tab1/Vegfb/Kcnn4/Iqgap1/Sema7a/Tlr9/Psap/Ptk2b/Dok2/Ccr1/Arrb1/Dvl3/Traf7/Cd44/Prxl2c/Dusp22/Tnfrsf19/Madd/Pten/Abca7/Map4k1/Stk3/Glipr2/Rock2/Map3k12/Mef2c/Ceacam1/Rap1a/Tirap/Prkce/Plcg2/Rap1b/Map4k4/Cd36/Fgd2/Rnf13/Dhx33/Scimp/Fcgr2b/Zeb2/…	66
GO:0006851	mitochondrial calcium ion transmembrane transport	22	-0.567781	-1.69535	0.00649158	0.049696	0.0379223	1387	tags=41%, list=11%, signal=36%	Ucp2/Mcur1/Bhlha15/Slc8b1/Mcub/Smdt1/Selenon/Itpr1/Akt1	9
GO:1901071	glucosamine-containing compound metabolic process	18	-0.595883	-1.69625	0.00482391	0.0414457	0.0316267	3297	tags=56%, list=27%, signal=41%	Oga/Ctbs/Chst3/Chil3/Gnpda1/Gne/Ogt/Chit1/Chst7/Hexb	10
GO:0030218	erythrocyte differentiation	115	-0.4089	-1.69713	0.000263459	0.00637536	0.00486495	2058	tags=32%, list=17%, signal=27%	Rb1/Selenow/Sfxn1/Hspa1b/Stat5b/Brd1/G6pdx/Zbtb7a/Hmga1/Ldb1/Kmt2e/Sp3/Cited2/Arid4a/Nemp1/Sp1/Smarca4/Maea/Slc1a5/Hba-a1/L3mbtl3/Klf13/Cebpg/Tcf3/Fech/Abcb10/Ets1/Pknox1/Rac1/Tmod3/Slc11a2/Mapk14/Acvr1b/Add1/Ehbp1l1/Slc48a1/Lmo2	37
GO:0051963	regulation of synapse assembly	70	-0.450165	-1.69744	0.00203914	0.0241711	0.0184446	2140	tags=36%, list=18%, signal=30%	Stau2/S1pr2/Pum2/Rhog/Sipa1l1/Arhgap33/Ube3b/Ctnnb1/Robo1/Ogt/Iqgap1/Crmp1/Ptk2b/Adgrl2/Iqsec2/Zdhhc8/Sema4a/Rac1/L1cam/Mef2c/Clstn3/Prickle1/Adgre5/Cript/Afdn	25
GO:1903531	negative regulation of secretion by cell	83	-0.433631	-1.69775	0.00134396	0.018239	0.0139179	2485	tags=37%, list=20%, signal=30%	Erp29/Fmr1/Cd300a/Vps4b/Jagn1/Acsl4/Braf/Syt11/Ccr2/Tnfrsf1b/Ucp2/Eny2/Gnai2/Pfkl/Nf1/Myo5a/Entpd1/Rab7/Cbarp/Rhbdf1/Madd/Ppp3ca/Ceacam1/Rap1a/Hadh/Rap1b/Map4k4/Pde3b/Anxa5/Tspo/Stxbp3	31
GO:0006811	monoatomic ion transport	465	-0.346309	-1.69782	1.14813e-07	2.88665e-05	2.20276e-05	2703	tags=36%, list=22%, signal=29%	Calcrl/Hspa2/Homer3/Afg3l2/Clcn4/Itgav/Slc30a5/Oxsr1/Atp10d/Cacna1h/Atp6v1c2/Atp2a3/Fmr1/Cacna1e/Diaph1/Atp1a1/Tfrc/Slc39a1/Cd300a/Slc25a37/Prnp/Prkcb/Slc39a4/Ttyh3/Vps4b/Kcnk6/Tg/Pcyox1/Ostm1/Wnk1/Ftl1/Spg11/Dnm2/Lcn2/Ano10/Sfxn1/Mmgt1/Tmc4/Slc39a13/Itgb1/Slc18b1/Iscu/Clcn7/Slc39a10/Tcirg1/Nedd4l/Atp6v1b2/Pon3/Nipal3/Cldn10/Mcoln2/Slc20a2/G6pdx/Mtor/Mllt6/Akap9/Atp2c1/Orai2/Atp6v1c1/Slc12a9/Pik3…	166
GO:0010634	positive regulation of epithelial cell migration	31	-0.528816	-1.69848	0.0033807	0.0325647	0.0248497	787	tags=32%, list=6%, signal=30%	Clasp1/Plcg1/Rab11a/Scrib/Glipr2/Prkce/Plcg2/Map4k4/Vim/Ctsh	10
GO:0097581	lamellipodium organization	58	-0.46826	-1.70089	0.00236826	0.0264796	0.0202062	2747	tags=43%, list=23%, signal=34%	Rreb1/Brk1/Snx1/Spata13/Dnm2/Myo9b/Wasf2/Golph3/Itgb1/Twf2/Mtor/Avil/Ablim1/Arhgef6/Arpc5/Cfl1/Capzb/Coro1c/Ccdc88a/Cd44/Cyfip1/Rac1/S1pr1/Vcl/Ablim2	25
GO:0043299	leukocyte degranulation	48	-0.479571	-1.70127	0.00396375	0.0364352	0.0278032	1736	tags=33%, list=14%, signal=29%	Itgam/Fcgr4/Fes/Stx4a/D6Wsu163e/Ccr2/Rasgrp1/Cplx2/Il4ra/Ywhaz/Pdpk1/Itgb2/Ceacam1/Stxbp3/Lat2/Fcer1g	16
GO:0048167	regulation of synaptic plasticity	109	-0.413896	-1.70204	0.000582391	0.010459	0.00798109	2478	tags=36%, list=20%, signal=29%	Rasgrf2/Fmr1/Cd2ap/Prnp/Pirb/Spg11/Stau2/Braf/Lgmn/Ncstn/Sipa1l1/Stx4a/Rab3a/Cplx2/Cfl1/Camk2b/Enpp1/Tyrobp/Itpr3/Ssh1/Nf1/Stau1/Eif4ebp2/Rgs14/Ptk2b/Lnpep/Rab11a/Slc38a1/Iqsec2/Dag1/Pten/Mgll/Rac1/Adora2a/Mef2c/Fcgr2b/Calhm2/Abhd6/Shisa8	39
GO:0046326	positive regulation of D-glucose import	26	-0.553119	-1.70211	0.00570008	0.0459665	0.0350764	1129	tags=27%, list=9%, signal=24%	Sorbs1/C1qtnf12/Adipor2/Rap1a/Mapk14/Rhoq/Akt1	7
GO:0002090	regulation of receptor internalization	51	-0.477899	-1.7032	0.0032323	0.0318365	0.024294	882	tags=24%, list=7%, signal=22%	Ppp3r1/Ankrd13d/Arrb1/Scrib/Hip1/Flot1/Hap1/Plcg2/Nsf/Rin3/Anxa2/Pip5k1c	12
GO:0007229	integrin-mediated signaling pathway	51	-0.478	-1.70356	0.00317188	0.0315527	0.0240774	2688	tags=49%, list=22%, signal=38%	Chuk/Itgav/Nid1/Ctnna1/Rcc2/Itgam/Itgb1/Itga4/Tec/Nme2/Vav1/Ptpra/Plek/Tyrobp/Sema7a/Ptk2b/Itgb2/Fut8/Tln1/Itga8/Flna/Zyx/Adam15/Fcer1g/Itgb7	25
GO:2001257	regulation of cation channel activity	40	-0.502454	-1.7042	0.00266899	0.0284015	0.0216728	1973	tags=35%, list=16%, signal=29%	Itgb1/Nedd4l/Fgf11/Stac2/Fkbp1a/Ehd3/Myo5a/Cbarp/Selenon/Gsto1/Hap1/Plcg2/Asph/Ahnak	14
GO:0007173	epidermal growth factor receptor signaling pathway	62	-0.464759	-1.70422	0.00121586	0.0167382	0.0127727	2309	tags=39%, list=19%, signal=32%	Rnf115/Kif16b/Rnf126/Braf/Abl2/Socs5/Snx5/Plaur/Pdpk1/Iqgap1/Rab7/Ptk2b/Ptpn12/Ccdc88a/Plcg1/Rhbdf1/Hip1/Ceacam1/Hap1/Dgkd/Prickle1/Mvb12b/Akt1/Dusp3	24
GO:0002262	myeloid cell homeostasis	153	-0.39124	-1.70572	0.000251608	0.00617288	0.00471044	2275	tags=31%, list=19%, signal=26%	Rb1/Selenow/Prdx1/Sfxn1/Itgam/Ncstn/Hspa1b/Stat5b/Brd1/G6pdx/Zbtb7a/Hmga1/Ldb1/Kmt2e/Sp3/Ccr2/Cited2/Arid4a/Nemp1/Bcl2l11/Sp1/Smarca4/Nf1/Maea/Slc1a5/Hba-a1/L3mbtl3/Klf13/Cebpg/Cd44/Tcf3/Axl/Fech/Abcb10/Ets1/Pknox1/Rac1/Tmod3/Lipa/Slc11a2/Mapk14/Acvr1b/Add1/Ehbp1l1/Fcgr2b/Slc48a1/Fcer1g/Lmo2	48
GO:1903036	positive regulation of response to wounding	33	-0.524493	-1.70755	0.00289907	0.0297825	0.0227266	3045	tags=48%, list=25%, signal=36%	Tbxa2r/Xbp1/Ano6/Rreb1/Braf/Itgb1/Pum2/Mtor/Prdx2/Vegfb/St3gal4/Emilin2/Hpse/Flna/Prkce/Cd36	16
GO:0006694	steroid biosynthetic process	85	-0.434627	-1.70784	0.000578267	0.0104241	0.00795448	2738	tags=38%, list=22%, signal=29%	Prkaa1/Cyp11a1/Srebf1/Mapk1/Cacna1h/Tecr/Atp1a1/Gh/Nfkb1/Cyp39a1/Hsd17b11/G6pdx/Lss/Erlin2/Hmgcs1/Scarb1/Abcg1/Bmp6/Dhcr24/Por/Hsd11b1/Cyb5r1/Amacr/Asah1/Lpcat3/Lipa/Sqle/Tspo/Srebf2/Dkkl1/H6pd/Gpr146	32
GO:0006643	membrane lipid metabolic process	120	-0.409045	-1.70786	0.000290569	0.00667331	0.00509231	2745	tags=43%, list=23%, signal=34%	Elovl5/Mfsd8/Slc30a5/Sirt3/Crem/Tecr/St8sia4/Acer3/Plpp1/Vapa/Cln6/Serinc1/Pigb/Pigc/B4galt5/Pigh/Gpaa1/Abca2/Cers4/Gba2/Cln8/Pyurf/Osbp/Sccpdh/Naga/Hexa/Elovl6/Pla2g6/Gm2a/P2rx7/Cerk/Smpd3/B3gnt5/Cers2/Psap/Sgpl1/St6galnac6/St3gal4/St3gal1/Tm9sf2/Asah1/Neu1/Hacd3/Sgpp1/Plpp2/Cers5/Pla2g15/Paqr4/Elovl1/B3galt4/Naaa/Hexb	52
GO:0048821	erythrocyte development	32	-0.529105	-1.70982	0.00434102	0.0387608	0.0295778	1836	tags=41%, list=15%, signal=35%	Brd1/G6pdx/Zbtb7a/Cited2/Arid4a/Nemp1/Maea/Hba-a1/L3mbtl3/Abcb10/Rac1/Tmod3/Slc11a2	13
GO:0001885	endothelial cell development	43	-0.497744	-1.71014	0.00210633	0.0246617	0.018819	601	tags=44%, list=5%, signal=42%	Ubiad1/Ptprs/Gpx1/Msn/Akap11/S1pr2/Clic4/S1pr3/F11r/Hpse/Rapgef3/Ccm2/Rock2/Vcl/Rap1a/Rap1b/Add1/Myadm/Afdn	19
GO:0050890	cognition	161	-0.390281	-1.71074	0.000264495	0.00637536	0.00486495	2348	tags=32%, list=19%, signal=26%	Prnp/Atad1/Git1/Pirb/Vps13b/Spg11/Braf/Syt11/Lcn2/Lgmn/Ncstn/Itgb1/Nipbl/Picalm/Btbd9/Abl2/Mtor/Glud1/Cln8/Dop1b/Ankrd11/Cic/Pla2g6/Trpm4/Gm2a/Gpr155/Rcan1/Ap1s2/Itpr3/Magt1/Nf1/St3gal4/Eif4ebp2/Rgs14/Uba6/Ppt1/Man2b1/Pten/Abca7/Cyfip1/Rapgef3/Cbr3/Itga8/Zfp385a/Gnas/Mef2c/Ep300/Slc11a2/Prkar2b/Clstn3/Camk2n1	51
GO:0046890	regulation of lipid biosynthetic process	114	-0.412866	-1.71094	0.000311673	0.00695731	0.00530903	2776	tags=39%, list=23%, signal=30%	Sik2/Elovl5/Srebf1/Sirt3/Mapk1/Atp1a1/Wdtc1/Gh/Nfkb1/Dgat1/Mlst8/Sirt2/Abca2/Fitm2/Abcd1/Mtor/Acsl3/Abca3/Erlin2/Avil/Scarb1/Abcg1/Bmp6/Por/Pla2g6/Gpam/Sorbs1/Smpd3/Ogt/Cnep1r1/Asah1/Lpcat3/Paqr4/Idh1/Ceacam1/Capn2/Tspo/Bscl2/Srebf2/Akt1/Abhd6/Dkkl1/H6pd/Gpr146	44
GO:0090130	tissue migration	60	-0.468953	-1.71177	0.00178471	0.0220298	0.0168106	1321	tags=32%, list=11%, signal=28%	Smad4/Lrg1/Arsb/Pkn1/Coro1c/Clasp1/Plcg1/Rab11a/Actn4/Pten/Scrib/Glipr2/Prkce/Plcg2/Eppk1/Map4k4/Vim/Zeb2/Ctsh	19
GO:0035270	endocrine system development	50	-0.482629	-1.71179	0.00233725	0.0263645	0.0201184	3200	tags=50%, list=26%, signal=37%	Bad/Raf1/Hhex/Bak1/Ly6e/Mapk1/Sidt2/Bmpr1a/Tg/Braf/Map2k2/Hmga1/Cited2/Mapk3/Bmp6/Smad4/Bhlha15/Nf1/Pdpk1/Eif2ak3/Rheb/Pde3b/Tspo/Il6ra/Hes1	25
GO:0048864	stem cell development	30	-0.53463	-1.71287	0.00317707	0.0315527	0.0240774	2592	tags=43%, list=21%, signal=34%	Mapk1/Bmpr1a/Sema4b/Cited2/Mapk3/Cfl1/Pef1/Tapt1/Coro1c/Sema7a/Sema4a/Zeb2/Hes1	13
GO:0005975	carbohydrate metabolic process	344	-0.358111	-1.71393	3.74625e-06	0.000319569	0.000243858	2916	tags=34%, list=24%, signal=27%	Hyal1/Dlat/Fcsk/Pfkfb4/Gnptg/Mlycd/Man2b2/B3gat3/B3glct/Sik2/Prkaa1/Phka2/Mfsd8/Chst3/Mogs/Scarb2/Siae/Wipi2/Pgam2/Man1a/Wdtc1/St8sia4/Nfkb1/Git1/Gsk3a/Pfkfb1/Pfkm/Mlst8/Gpt/Pgm2/B4galt5/Cbfa2t3/Chil3/Acadm/Cs/Gnpda1/Fuom/G6pdx/Mtor/Inppl1/Fkrp/Gba2/Zbtb7a/Pfkp/Uxs1/Gdpgp1/Chst15/Myh9/Ndst1/Ucp2/Rb1cc1/Naga/Acacb/Hsd11b1/Gclc/Hexa/Plek/Gne/Stk40/Il6st/Gm2a/Sorbs1/Enpp1/P2rx7/C1qtnf12/Agl/Smpd3/Hs…	117
GO:0032367	intracellular cholesterol transport	25	-0.559739	-1.71464	0.00430856	0.038543	0.0294117	1804	tags=44%, list=15%, signal=38%	Abca2/Abca1/Osbp/Abcg1/Npc2/Osbpl2/Vps51/Cd320/Npc1/Ldlrap1/Anxa2	11
GO:0050654	chondroitin sulfate proteoglycan metabolic process	21	-0.582597	-1.71646	0.00527751	0.043921	0.0335155	2916	tags=57%, list=24%, signal=44%	Hyal1/Xylt1/B3gat3/Chsy1/Chst3/Dse/Galns/Arsb/Gusb/Chst12/Chst7/Hexb	12
GO:0032869	cellular response to insulin stimulus	156	-0.39242	-1.7186	0.000197279	0.00514973	0.00392969	3281	tags=44%, list=27%, signal=32%	Rps6kb2/Pik3ca/Prkca/Sos2/Raf1/Prkcz/Marcks/Cpeb2/Uso1/Lpin2/Sos1/Xbp1/Hdac9/Blvrb/Sik2/Prkaa1/Lonp1/Ptprj/Srebf1/Mapk1/Grk2/Wdtc1/Gh/Prkcb/Rb1/Gsk3a/Apc/Prkci/Gpt/Tsc2/Mtor/Inppl1/Hmga1/Snx5/Mapk3/Ptpra/Ucp2/Gclc/Sp1/Gpam/Gnai2/Zfp106/Socs3/Sorbs1/Enpp1/C1qtnf12/Echdc3/Pip4k2b/Nucks1/Ogt/Myo5a/Ctsd/Pdpk1/Zbtb7b/Eif4ebp2/Pten/Cyfip1/Eif4ebp1/Ceacam1/Atp2b1/Pck2/Parp1/Pde3b/Ptpre/Rab10/Rab31/Rhoq/…	68
GO:0007264	small GTPase-mediated signal transduction	265	-0.368661	-1.7197	6.5418e-06	0.000440143	0.000335867	2480	tags=35%, list=20%, signal=29%	Rasgef1a/Rasgrf2/Sgsm3/Cd2ap/Mapre2/Rasal1/Dock8/Rgl2/Cdc42se1/Rhoc/Rapgef4/Arhgap9/Rb1/Rab4b/Git1/Arhgef11/Dnm2/Myo9b/Wasf2/Rhot2/Rasip1/Cdc42ep4/Itgb1/Tsc2/Rhog/Sipa1l1/Picalm/Abl2/Arhgef12/Nradd/Arhgap33/Ccdc88c/Abca1/Pik3cg/Sh2d3c/Vav1/Dhcr24/Rhof/Nucb1/Timp2/Rasgrp1/G3bp2/Bnip2/Shtn1/Nkiras2/Rassf1/Dgkz/Rap2b/Robo1/Rhobtb2/Ogt/Nf1/Rhebl1/Arhgap45/Rgl1/Arl3/Rab12/Dok2/Ccdc88a/Arrb1/Ywhaq/Rab3…	93
GO:0032964	collagen biosynthetic process	22	-0.576742	-1.72211	0.0053215	0.0442101	0.0337361	497	tags=32%, list=4%, signal=31%	Rapgef3/Ep300/Rap1a/Acvr1b/Vim/Il6ra/Rcn3	7
GO:1902930	regulation of alcohol biosynthetic process	27	-0.554736	-1.72283	0.00456054	0.0399737	0.0305034	2657	tags=59%, list=22%, signal=46%	Gfi1/Scap/Srebf1/Mapk1/Nfkb1/Isyna1/Erlin2/Abcg1/Bmp6/Myh9/Por/Plek/Lpcat3/Srebf2/H6pd/Gpr146	16
GO:0061041	regulation of wound healing	47	-0.487954	-1.72313	0.00218093	0.0254105	0.0193904	1397	tags=49%, list=11%, signal=43%	Tbxa2r/Xbp1/Tnfrsf12a/Ano6/Rreb1/Sh2b3/Itgb1/Mtor/Prdx2/Cd9/Plaur/Vegfb/Clasp1/St3gal4/Pten/Emilin2/Hpse/Ceacam1/Prkce/Eppk1/Cd36/Anxa5/Anxa2	23
GO:0023061	signal release	238	-0.374252	-1.7238	2.13643e-05	0.00101047	0.000771074	2459	tags=34%, list=20%, signal=28%	Fmr1/Cacna1e/Sidt2/Cd300a/Abcc4/Rapgef4/Prkcb/Git1/Ccdc186/Dgat1/Jagn1/Pfkm/Acsl4/Braf/Syt11/Tcirg1/Fbxl20/Aacs/Cdk16/Glud1/Tmf1/Stx4a/Hmga1/Abca1/Osbp/Rab3a/Abcg1/Bmp6/Myh9/Ucp2/Cplx2/Smad4/Slc8b1/Eny2/Rab11b/Pla2g6/Stx2/Trpm4/Mpc2/P2rx7/C1qtnf12/C2cd2l/Gna11/Osbpl2/Smpd3/Pfkl/Slc6a9/Nf1/Ywhaz/Myo5a/Kcnn4/Entpd1/Atp2a2/Arrb1/Efr3a/Ppt1/Madd/Lrrc8a/Scrib/Clcf1/Gnas/Rac1/Adora2a/Mef2c/Ppp3ca/Mafa/…	81
GO:1900078	positive regulation of cellular response to insulin stimulus	24	-0.566314	-1.72557	0.00594657	0.0471611	0.035988	1888	tags=42%, list=16%, signal=35%	Tsc2/Snx5/Gnai2/Sorbs1/C1qtnf12/Echdc3/Nucks1/Myo5a/Ctsd/Zbtb7b	10
GO:0002011	morphogenesis of an epithelial sheet	33	-0.530302	-1.72646	0.00247408	0.0269833	0.0205906	3195	tags=61%, list=26%, signal=45%	Map3k1/Rhoa/Sos1/Rreb1/Dvl1/Chuk/Itgav/Lrp6/Rhoc/Mtor/Cd151/Lrg1/Clasp1/Acvrl1/Cd44/Dag1/Pten/Mrtfa/Flna/Ceacam1	20
GO:0034394	protein localization to cell surface	41	-0.503121	-1.72705	0.00329402	0.0321133	0.0245052	1903	tags=44%, list=16%, signal=37%	Nedd4l/Tsc2/Picalm/Abca2/Stx4a/Unc50/Ctnnb1/Rab11b/Tyrobp/Rab11a/Abca7/Gga1/Flna/Kcnab2/Vcl/Gpd1l/Akt1/Fcer1g	18
GO:0046341	CDP-diacylglycerol metabolic process	12	-0.678416	-1.72878	0.00469602	0.040787	0.031124	1615	tags=33%, list=13%, signal=29%	Cdipt/Gpam/Agpat2/Gpat3	4
GO:0030835	negative regulation of actin filament depolymerization	31	-0.53849	-1.72955	0.00210633	0.0246617	0.018819	1590	tags=45%, list=13%, signal=39%	Twf2/Avil/Cfl1/Capzb/Svil/Sptbn1/Add3/Sptan1/Tpm1/Tmod3/Mtpn/Add1/Sptb/Lima1	14
GO:0043603	amide metabolic process	268	-0.370724	-1.73092	5.6855e-06	0.000402589	0.00030721	2348	tags=32%, list=19%, signal=27%	Prnp/Tmed10/St8sia4/Gsk3a/Acer3/Plpp1/Vapa/Dgat1/Cln6/Gclm/Acsl4/Mlst8/Txnrd3/B4galt5/Ncstn/Cs/Gnpda1/Hagh/Picalm/Abca2/Rtn3/Cers4/Fitm2/Abcd1/G6pdx/Mtor/Acsl3/Gba2/Cln8/Gstm1/Hmgcs1/Osbp/Abcg1/Cmas/Ece1/Acacb/Hsd11b1/Gclc/Hexa/Slc27a3/Elovl6/Sp1/Pla2g6/Gpam/Gne/Gm2a/Enpp1/Gstm5/Mpc2/P2rx7/Cerk/Smpd3/Hsd17b4/Acly/Hmgn5/Cers2/Acss1/Psap/Sgpl1/St6galnac6/St3gal1/Tm9sf2/Ada/Eif2ak3/Asah1/Neu1/Plpp2/…	87
GO:0006816	calcium ion transport	187	-0.385398	-1.73112	5.08162e-05	0.00208686	0.00159245	1785	tags=31%, list=15%, signal=27%	Mcoln2/G6pdx/Atp2c1/Orai2/Pik3cg/Tmem165/Ptpn22/Tpcn1/Stac2/Ucp2/Ryr1/Ctnnb1/Mcur1/Bhlha15/P2rx4/Camk2b/Slc8b1/Mcub/Pml/Gnai2/Trpm4/Fkbp1a/P2rx7/Itpr3/Ehd3/Smdt1/Tmco1/Myo5a/Ppp3r1/Kcnn4/Pdpk1/Tlr9/Atp2a2/Ptk2b/Tmem38a/Cbarp/Ccr1/Tspan13/Plcg1/Selenon/Rapgef3/Flna/Adora2a/Ppp3ca/Gsto1/Atp2b1/Hap1/Prkce/Plcg2/Tmbim6/Tspo/Itpr1/Asph/Cacna1i/Calhm2/Ahnak/Akt1/Hes1	58
GO:0050885	neuromuscular process controlling balance	28	-0.551992	-1.73164	0.00391603	0.0364352	0.0278032	1752	tags=43%, list=14%, signal=37%	Abl2/Cln8/Hexa/Camk2b/Gm2a/Ap1s2/Tpp1/Myo5a/Psap/Aplp2/Myo7a/Hexb	12
GO:0045216	cell-cell junction organization	86	-0.438552	-1.73203	0.000470517	0.00895911	0.00683657	2314	tags=37%, list=19%, signal=30%	Cd2ap/Rhoc/Ctnna1/Prkci/Crb3/Itgb1/Nedd4l/Cldn10/Fkrp/Bmp6/Hdac7/Ctnnb1/Cd9/Bhlha15/Slc39a9/Lsr/Acvrl1/Actn4/F11r/Plekha7/Ccm2/Flna/Rac1/Rock2/Hipk1/Ceacam1/Vcl/Jup/Add1/Plec/Mtss1/Afdn	32
GO:0008544	epidermis development	149	-0.398487	-1.73211	0.000171633	0.00473287	0.00361159	1672	tags=30%, list=14%, signal=26%	Atp2c1/Ldb1/Nme2/Keap1/Cux1/Tmprss13/Clic4/Nab2/Ctnnb1/Smad4/Pphln1/Sfn/Lsr/Agpat2/Smarca4/Flnb/Nf1/Myo5a/Ubn1/Alg10b/Psap/Slc4a7/Trpc4ap/Tnfrsf19/Asah1/Sgpp1/Scrib/Hpse/Ovol3/Cdkn1a/Nab1/Elovl1/Gnas/Rac1/Rock2/Mfsd12/Myo7a/Ppp3ca/Acvr1b/Slc44a4/Sostdc1/Akt1/Hes1/Plec	44
GO:1901617	organic hydroxy compound biosynthetic process	119	-0.415988	-1.73229	0.000148895	0.00435802	0.00332554	1804	tags=27%, list=15%, signal=23%	Abca2/G6pdx/Lss/Erlin2/Hmgcs1/Abcg1/Bmp6/Srd5a3/Dhcr24/Myh9/Cited1/Por/Plek/Spr/Cyb5r1/Myo5a/Amacr/Plcg1/Pltp/Asah1/Lpcat3/Mfsd12/Lipa/Pck2/Plcg2/Sqle/Aldh2/Zeb2/Srebf2/Dkkl1/H6pd/Gpr146	32
GO:0033555	multicellular organismal response to stress	34	-0.53277	-1.73282	0.00277639	0.0289582	0.0220976	2489	tags=41%, list=20%, signal=33%	Usp46/Cacna1e/Atat1/Fbxl20/Mtor/P2rx4/Selenon/Pten/Mef2c/Ppp3ca/Capn2/Tspo/Hdac5/Akt1	14
GO:0032527	protein exit from endoplasmic reticulum	37	-0.52037	-1.73445	0.00157116	0.020068	0.0153136	2903	tags=41%, list=24%, signal=31%	Rangrf/Gcc2/Os9/Sec61b/Tm9sf4/Tmem30a/H13/Syvn1/Nploc4/Bcap31/Derl3/Derl1/Edem1/Mia2/Sel1l	15
GO:1903530	regulation of secretion by cell	303	-0.36792	-1.73617	1.67963e-06	0.000174426	0.000133102	2485	tags=32%, list=20%, signal=26%	Erp29/Fmr1/Cacna1e/Cd2ap/Sidt2/Cd300a/Tmed10/Rapgef4/Prkcb/Vps4b/Git1/Jagn1/Pfkm/Acsl4/Bsg/Braf/Syt11/Rgcc/Itgam/Golph3/Tcirg1/Fbxl20/Aacs/Cdk16/Glud1/Tmf1/Fes/Stx4a/D6Wsu163e/Osbp/Rab3a/Abcg1/Ccr2/Bmp6/Tnfrsf1b/Myh9/Ucp2/Smad4/Myo18a/Slc8b1/Eny2/Pla2g6/Gnai2/Trpm4/Mpc2/P2rx7/C1qtnf12/C2cd2l/Gna11/Smpd3/Pfkl/Il4ra/Nf1/Myo5a/Kcnn4/Pdpk1/Entpd1/Rab7/Clasp1/Atp2a2/Cbarp/Golph3l/Arrb1/Itgb2/Rab3d/Rhb…	98
GO:0045792	negative regulation of cell size	10	-0.708701	-1.73662	0.00601738	0.047434	0.0361962	3157	tags=70%, list=26%, signal=52%	Akt1s1/Rhoa/Tsc2/Mtor/Cfl1/Pten/Akt1	7
GO:0007411	axon guidance	58	-0.478201	-1.737	0.00146719	0.0193231	0.0147452	1565	tags=33%, list=13%, signal=29%	Ablim1/Ece1/Lmtk2/Smad4/Robo1/Lmo4/Sema7a/Usp33/Dag1/Sema4a/Cyfip1/Flot1/Rac1/L1cam/Mef2c/Alcam/Tubb2b/Tubb3/Rtn4rl1	19
GO:0097485	neuron projection guidance	58	-0.478201	-1.737	0.00146719	0.0193231	0.0147452	1565	tags=33%, list=13%, signal=29%	Ablim1/Ece1/Lmtk2/Smad4/Robo1/Lmo4/Sema7a/Usp33/Dag1/Sema4a/Cyfip1/Flot1/Rac1/L1cam/Mef2c/Alcam/Tubb2b/Tubb3/Rtn4rl1	19
GO:0032970	regulation of actin filament-based process	214	-0.383245	-1.73762	1.11962e-05	0.000668554	0.000510164	2435	tags=33%, list=20%, signal=27%	Cd2ap/Washc2/Atp1a1/Rhoc/Limk1/Baiap2l1/Stau2/Mlst8/Braf/Wasf2/Cnn2/Rgcc/Arap2/Cdc42ep4/Twf2/Rhog/Naa20/Mtor/Akap9/Gba2/Snx9/Avil/Washc5/Rhof/Myh9/Arpc5/Smad4/Cfl1/Capzb/Plek/Svil/Sptbn1/Trpm4/Hck/Prex1/Ssh1/Clasp1/Atp2a2/Coro2b/Ptk2b/Ccdc88a/Add3/F11r/Cyfip1/Sptan1/Rapgef3/Arpc5l/Gm14137/Tpm1/Rnh1/Flna/Rac1/Ssh2/Tmod3/S1pr1/Rock2/Mef2c/Ep300/Jup/Dstn/Prkce/Arhgef18/Mtpn/Add1/S100a10/Sptb/Zeb2/My…	70
GO:0030036	actin cytoskeleton organization	384	-0.361268	-1.74008	1.94731e-07	4.42966e-05	3.38021e-05	2339	tags=30%, list=19%, signal=25%	Actn1/Rhoc/Akap11/Daam1/Limk1/Baiap2l1/Ehd2/Mrtfb/Prkci/Sirpa/Stau2/Mlst8/Braf/Dnm2/S1pr2/Wasf2/Cnn2/Fmnl1/Rgcc/Arap2/Cdc42ep4/Itgb1/Twf2/Rhog/Sipa1l1/Naa20/Abl2/Mtor/Inppl1/Gba2/Snx9/Atp2c1/Khdc3/Avil/Jmy/Washc5/Rhof/Myh9/Arpc5/Smad4/Cfl1/Myo18a/Capzb/Shtn1/Plek/Svil/Sptbn1/Hck/Fmnl2/Myo1d/Sorbs1/Tyrobp/Prex1/Rhobtb2/Parvg/Ssh1/Gas2l1/Flnb/Nf1/Myo5a/Coro1c/Iqgap1/Clasp1/Coro2b/Ptk2b/Ccdc88a/Gas7…	117
GO:0060349	bone morphogenesis	42	-0.506834	-1.74074	0.00321134	0.0316954	0.0241863	2447	tags=50%, list=20%, signal=40%	Thbs3/Alpl/Lrp6/Fosl2/Sik3/Inppl1/Cited2/Bmp6/Ltf/Por/Nab2/Glg1/Enpp1/Runx2/Smpd3/Mef2d/Nab1/Gnas/Rarg/Mef2c/Acp5	21
GO:0010001	glial cell differentiation	139	-0.405717	-1.74095	0.000152525	0.00436295	0.0033293	2053	tags=30%, list=17%, signal=25%	B4galt5/Itgam/Ncstn/Map2k2/Sirt2/Abca2/Abl2/Mtor/Tenm4/Fkrp/Cnp/Mapk3/Tnfrsf1b/Ptpra/Nab2/Ctnnb1/Neurod4/Il6st/Med12/Enpp1/Smarca4/Nf1/Ppp3r1/Atf5/Sox5/Dag1/Pten/Clcf1/Rheb/Nab1/Adora2a/Mxra8/Pfkfb3/Lef1/Tppp/Vim/Zeb2/Akt1/Ndrg1/Hes1/Plec/Afdn	42
GO:0097435	supramolecular fiber organization	448	-0.357379	-1.74258	4.95039e-08	1.51324e-05	1.15473e-05	2435	tags=31%, list=20%, signal=26%	Cd2ap/Washc2/Diaph1/Pde4dip/Eml4/Actn1/Slain2/Rhoc/Rb1/Git1/Limk1/Apc/Baiap2l1/Tubgcp6/Fus/Pcnt/Prkci/Sirpa/Mlst8/Atxn7/Braf/Dnm2/Wasf2/Cnn2/Rgcc/Cdc42ep4/Nme7/Itgb1/Hspa1b/Twf2/Rhog/Mapre3/Cep120/Adamts14/Abl2/Mtor/Inppl1/Akap9/Gba2/Snx9/Fes/Map10/Mdm2/Ccdc88c/Golga2/Khdc3/Avil/Vps33b/Jmy/Washc5/Rhof/Myh9/Arpc5/Smad4/Cfl1/Map4/Capzb/Shtn1/Plek/Svil/Sptbn1/Myo1d/Sorbs1/Tppp3/Prex1/Rhobtb2/Ssh1/Cl…	139
GO:0099536	synaptic signaling	331	-0.365595	-1.74323	1.197e-06	0.000146618	0.000111882	2697	tags=36%, list=22%, signal=29%	Dvl1/Atxn1/Homer3/Sh3gl1/Ptprs/Tmod2/Mapk1/Grk2/Usp46/Rasgrf2/Fmr1/Cacna1e/Cd2ap/Prnp/Lrp6/Atad1/Rapgef4/Prkcb/Git1/Wnk1/Gls/Pirb/Spg11/Stau2/Braf/Syt11/S1pr2/Lgmn/Prkar2a/Ncstn/Itgb1/Fbxl20/Tsc2/Anxa9/Sipa1l1/Btbd9/Mtor/Stx4a/Mdm2/Rab3a/Ccr2/Mapk3/Ptpra/Bsn/Anks1b/Zmynd8/Ctnnb1/Faah/Cplx2/Cfl1/P2rx4/Camk2b/Chrnb1/Pla2g6/Pde4a/Stx2/Gnai2/Sorbs1/Ly6m/Enpp1/Tyrobp/P2rx7/Akap12/Kif1b/Gna11/Osbpl2/It…	119
GO:0035883	enteroendocrine cell differentiation	13	-0.668748	-1.74407	0.00555527	0.0452088	0.0344982	1473	tags=54%, list=12%, signal=47%	Bad/Sidt2/Bmp6/Bhlha15/Pdpk1/Rheb/Hes1	7
GO:0060078	regulation of postsynaptic membrane potential	35	-0.531574	-1.74472	0.00317359	0.0315527	0.0240774	2869	tags=57%, list=24%, signal=44%	Prkcz/Ano6/Dvl1/Atxn1/Sh3gl1/Grk2/Fmr1/S1pr2/Zmynd8/P2rx4/Chrnb1/P2rx7/Ssh1/Ptk2b/Pten/Adora2a/Mef2c/Ppp3ca/Kctd12/Afdn	20
GO:0015748	organophosphate ester transport	98	-0.433313	-1.74486	0.000278306	0.00654909	0.00499752	2649	tags=42%, list=22%, signal=33%	Scarb2/Atp11c/Atp10d/Osbpl5/Abcc4/Vapa/Ank/Tmem30a/Slc25a51/Abcd1/Atp11b/Abca3/Abca1/Osbp/Scarb1/Abcg1/Atp8b2/Slc35a1/Spns1/Lrrc8c/P2rx7/C2cd2l/Osbpl2/Pitpna/Slc35a5/Kcnn4/Slc35c2/Prelid1/Slc35c1/Esyt1/Pltp/Lrrc8a/Slc33a1/Abca7/Slc25a17/Slc66a2/Cptp/Slc19a1/Slc44a4/Slc17a9/Calhm2	41
GO:0060079	excitatory postsynaptic potential	31	-0.543697	-1.74628	0.00183358	0.0225167	0.0171822	2697	tags=55%, list=22%, signal=43%	Dvl1/Atxn1/Sh3gl1/Grk2/Fmr1/S1pr2/Zmynd8/P2rx4/Chrnb1/P2rx7/Ssh1/Ptk2b/Pten/Adora2a/Mef2c/Ppp3ca/Afdn	17
GO:0090100	positive regulation of transmembrane receptor protein serine/threonine kinase signaling pathway	52	-0.489845	-1.7466	0.0015557	0.0199238	0.0152036	1502	tags=27%, list=12%, signal=24%	Cited2/Bmp6/Smad4/Lrg1/Acvrl1/Csnk2b/Itga8/Ep300/Parp1/Vsir/Acvr1b/Twsg1/Zeb2/Hes1	14
GO:1900024	regulation of substrate adhesion-dependent cell spreading	32	-0.540999	-1.74826	0.0028244	0.0293239	0.0223766	2747	tags=44%, list=23%, signal=34%	Rreb1/Cib1/Braf/Dnm2/Rcc2/Cass4/Prex1/Coro1c/Actn4/Flna/Rac1/St6gal1/S100a10/Myadm	14
GO:0001755	neural crest cell migration	12	-0.686293	-1.74885	0.00396332	0.0364352	0.0278032	1910	tags=50%, list=16%, signal=42%	Sema4b/Cfl1/Coro1c/Sema7a/Sema4a/Zeb2	6
GO:0090497	mesenchymal cell migration	12	-0.686293	-1.74885	0.00396332	0.0364352	0.0278032	1910	tags=50%, list=16%, signal=42%	Sema4b/Cfl1/Coro1c/Sema7a/Sema4a/Zeb2	6
GO:0072009	nephron epithelium development	33	-0.537218	-1.74897	0.00192767	0.0233374	0.0178085	1360	tags=33%, list=11%, signal=30%	Cited1/Ctnnb1/Smad4/Hs2st1/Iqgap1/Asxl1/Cd44/Mef2c/Lzts2/Hes1/Mtss1	11
GO:0010631	epithelial cell migration	57	-0.482281	-1.74907	0.000838269	0.0130863	0.00998598	1321	tags=33%, list=11%, signal=30%	Smad4/Lrg1/Arsb/Pkn1/Coro1c/Clasp1/Plcg1/Rab11a/Actn4/Pten/Scrib/Glipr2/Prkce/Plcg2/Eppk1/Map4k4/Vim/Zeb2/Ctsh	19
GO:0090132	epithelium migration	57	-0.482281	-1.74907	0.000838269	0.0130863	0.00998598	1321	tags=33%, list=11%, signal=30%	Smad4/Lrg1/Arsb/Pkn1/Coro1c/Clasp1/Plcg1/Rab11a/Actn4/Pten/Scrib/Glipr2/Prkce/Plcg2/Eppk1/Map4k4/Vim/Zeb2/Ctsh	19
GO:1902742	apoptotic process involved in development	17	-0.620942	-1.74926	0.00595207	0.0471611	0.035988	1580	tags=53%, list=13%, signal=46%	Kcnq1ot1/Tnfrsf1b/Bcl2l11/Pml/Enpp1/Kif1b/Ppp2r1b/Scrib/Lef1	9
GO:0070588	calcium ion transmembrane transport	147	-0.403757	-1.75044	0.000172393	0.00473287	0.00361159	1785	tags=34%, list=15%, signal=29%	Mcoln2/G6pdx/Atp2c1/Orai2/Pik3cg/Tmem165/Ptpn22/Tpcn1/Stac2/Ucp2/Ryr1/Mcur1/Bhlha15/P2rx4/Slc8b1/Mcub/Pml/Trpm4/Fkbp1a/P2rx7/Itpr3/Ehd3/Smdt1/Tmco1/Myo5a/Ppp3r1/Kcnn4/Pdpk1/Tlr9/Atp2a2/Ptk2b/Tmem38a/Cbarp/Tspan13/Plcg1/Selenon/Rapgef3/Flna/Ppp3ca/Gsto1/Atp2b1/Hap1/Prkce/Plcg2/Tmbim6/Itpr1/Asph/Cacna1i/Ahnak/Akt1	50
GO:0060627	regulation of vesicle-mediated transport	343	-0.365738	-1.75084	4.16121e-07	8.64265e-05	6.59508e-05	2754	tags=36%, list=23%, signal=28%	Lgals3/Pip4p2/Prkaa1/Ptprj/Dvl1/Sh3gl1/Itgav/Mapk1/Cacna1h/Usp46/Msn/Fmr1/Cacna1e/Cd2ap/Nod2/Cd300a/Atad1/Rapgef4/Prkcb/Vps4b/Rab4b/Git1/Ehd2/Sirpa/Braf/Dnm2/Syt11/Ighm/Cnn2/Itgam/Itgb1/Map2k2/Sirt2/Nedd4l/Fbxl20/Tsc2/Rab29/Picalm/Btbd9/Chmp3/Abca2/Dnajc13/Acsl3/Znrf2/Rab5b/Snx9/Atp2c1/Fes/Stx4a/Cd151/Mdm2/D6Wsu163e/Rab3a/Scarb1/Ccr2/Mapk3/Bsn/Myh9/Tnk2/Vps28/Cplx2/Slamf1/Myo18a/Rab11b/Pla2g6/Gna…	122
GO:0099177	regulation of trans-synaptic signaling	241	-0.380534	-1.75091	1.26165e-05	0.000734985	0.000560857	2697	tags=39%, list=22%, signal=31%	Dvl1/Homer3/Sh3gl1/Ptprs/Mapk1/Grk2/Usp46/Rasgrf2/Fmr1/Cacna1e/Cd2ap/Prnp/Atad1/Rapgef4/Prkcb/Git1/Wnk1/Pirb/Spg11/Stau2/Braf/S1pr2/Lgmn/Prkar2a/Ncstn/Itgb1/Fbxl20/Sipa1l1/Btbd9/Mtor/Stx4a/Mdm2/Rab3a/Ccr2/Mapk3/Ptpra/Bsn/Zmynd8/Faah/Cplx2/Cfl1/Camk2b/Pla2g6/Pde4a/Gnai2/Enpp1/Tyrobp/P2rx7/Akap12/Itpr3/Ssh1/Slc6a9/Nf1/Myo5a/Ppp3r1/Stau1/Atp2a2/Eif4ebp2/Rgs14/Ptk2b/Lnpep/Plcg1/Rab11a/Slc38a1/Iqsec2/…	93
GO:0098657	import into cell	499	-0.355725	-1.75166	1.39447e-08	6.05579e-06	4.62109e-06	2830	tags=38%, list=23%, signal=31%	Gpr107/Dennd1b/Rala/Rab20/Itch/Slc12a8/Lgals3/Pip4p2/Ptprj/Calcrl/Ap3s1/Snx1/Sh3gl1/Itgav/Scarb2/Slc30a5/Bin2/Pld4/Mapk1/Grk2/Mtmr6/Usp46/Fmr1/Cacna1e/Eps15/Cd2ap/Diaph1/Atp1a1/Tfrc/Nod2/Cd300a/Prnp/Ncf2/Lrp6/Cdc42se1/Atad1/Eps15l1/Tm9sf4/Mfge8/Slc39a4/Rab4b/Scyl2/Mapkapk2/Ehd2/Wnk1/Arhgef11/Sirpa/Spg11/Dnm2/Syt11/Ifitm3/Ighm/Lcn2/Sh3glb2/Wasf2/Ap2a2/Cnn2/Cltb/Itgam/Micall1/Itgb1/Slc18b1/Iscu/Slc…	191
GO:0010543	regulation of platelet activation	26	-0.569365	-1.75211	0.0034817	0.0333308	0.0254343	1758	tags=42%, list=14%, signal=36%	Tec/Vps33b/Pear1/Cd9/Plek/F11r/Emilin2/Flna/Ceacam1/Il6ra/Fcer1g	11
GO:0030048	actin filament-based movement	47	-0.496528	-1.75341	0.00117368	0.0163778	0.0124977	2563	tags=49%, list=21%, signal=39%	Cacna1h/Atp1a1/Myl6/Myo9b/Wasf2/Nedd4l/Akap9/Ccdc88c/Myh9/Shtn1/Trpm4/Myo1d/Myo5a/Atp2a2/Nup155/Actn4/Tpm1/Flna/Myo7a/Jup/Gpd1l/Zeb2/Sun2	23
GO:0006897	endocytosis	420	-0.361445	-1.75426	5.06842e-08	1.51324e-05	1.15473e-05	2830	tags=39%, list=23%, signal=31%	Gpr107/Dennd1b/Rala/Rab20/Itch/Lgals3/Pip4p2/Ptprj/Calcrl/Ap3s1/Snx1/Sh3gl1/Itgav/Scarb2/Bin2/Pld4/Mapk1/Grk2/Mtmr6/Usp46/Fmr1/Eps15/Cd2ap/Diaph1/Tfrc/Nod2/Cd300a/Ncf2/Lrp6/Cdc42se1/Atad1/Eps15l1/Tm9sf4/Mfge8/Rab4b/Scyl2/Mapkapk2/Ehd2/Sirpa/Spg11/Dnm2/Syt11/Ifitm3/Ighm/Sh3glb2/Wasf2/Ap2a2/Cnn2/Cltb/Itgam/Micall1/Itgb1/Sirt2/Gak/Nedd4l/Tsc2/Itga4/Picalm/Btbd9/Synrg/Abca2/Dnajc13/Abl2/Fcgr4/Inppl1/…	163
GO:0046473	phosphatidic acid metabolic process	18	-0.616411	-1.75468	0.00270979	0.0287022	0.0219022	1745	tags=56%, list=14%, signal=48%	Dgkg/Pla2g6/Abhd5/Gpam/Dgkz/Sh3glb1/Agpat2/Dgkh/Dgkd/Bscl2	10
GO:0030001	metal ion transport	344	-0.367845	-1.76052	9.04624e-07	0.0001271	9.6988e-05	2703	tags=38%, list=22%, signal=31%	Calcrl/Hspa2/Homer3/Afg3l2/Itgav/Slc30a5/Oxsr1/Cacna1h/Atp2a3/Fmr1/Cacna1e/Diaph1/Atp1a1/Tfrc/Slc39a1/Slc25a37/Prnp/Prkcb/Slc39a4/Vps4b/Kcnk6/Wnk1/Ftl1/Spg11/Dnm2/Lcn2/Sfxn1/Mmgt1/Slc39a13/Itgb1/Iscu/Slc39a10/Nedd4l/Pon3/Nipal3/Mcoln2/Slc20a2/G6pdx/Mllt6/Akap9/Atp2c1/Orai2/Slc12a9/Pik3cg/Fgf11/Tmem165/Ptpn22/Slc39a3/Tpcn1/Stac2/Kcnk10/Ltf/Slc41a3/Ucp2/Lmtk2/Ryr1/Ctnnb1/Mcur1/Bhlha15/P2rx4/Camk2b/…	132
GO:0061515	myeloid cell development	64	-0.475855	-1.76341	0.000968561	0.014452	0.0110282	2146	tags=38%, list=18%, signal=31%	Cebpb/Wasf2/Itgam/Brd1/G6pdx/Zbtb7a/Vps33b/Cited2/Arid4a/Nemp1/Ltf/Tyrobp/Fli1/Maea/Hba-a1/L3mbtl3/Abcb10/Flna/Zfp385a/Rac1/Tmod3/Ep300/Slc11a2/Anxa2	24
GO:0009268	response to pH	16	-0.639209	-1.76364	0.004898	0.0417315	0.0318447	2943	tags=69%, list=24%, signal=52%	Chp1/Hyal1/Gh/Tg/Lgmn/Clcn7/Rab11b/Arsb/Gna11/Hvcn1/Arsa	11
GO:0034332	adherens junction organization	25	-0.575942	-1.76428	0.00235654	0.0264796	0.0202062	543	tags=36%, list=4%, signal=34%	Bmp6/Ctnnb1/Plekha7/Hipk1/Vcl/Add1/Plec/Mtss1/Afdn	9
GO:0061028	establishment of endothelial barrier	33	-0.542077	-1.76479	0.00159375	0.0203022	0.0154923	601	tags=30%, list=5%, signal=29%	F11r/Hpse/Rapgef3/Rock2/Vcl/Rap1a/Rap1b/Add1/Myadm/Afdn	10
GO:0014032	neural crest cell development	26	-0.573606	-1.76516	0.00295867	0.0302119	0.0230543	2592	tags=50%, list=21%, signal=39%	Mapk1/Bmpr1a/Sema4b/Cited2/Mapk3/Cfl1/Pef1/Tapt1/Coro1c/Sema7a/Sema4a/Zeb2/Hes1	13
GO:0050804	modulation of chemical synaptic transmission	240	-0.383426	-1.76593	6.4473e-06	0.000439982	0.000335744	2697	tags=39%, list=22%, signal=31%	Dvl1/Homer3/Sh3gl1/Ptprs/Mapk1/Grk2/Usp46/Rasgrf2/Fmr1/Cacna1e/Cd2ap/Prnp/Atad1/Rapgef4/Prkcb/Git1/Wnk1/Pirb/Spg11/Stau2/Braf/S1pr2/Lgmn/Prkar2a/Ncstn/Itgb1/Fbxl20/Sipa1l1/Btbd9/Mtor/Stx4a/Mdm2/Rab3a/Ccr2/Mapk3/Ptpra/Bsn/Zmynd8/Faah/Cplx2/Cfl1/Camk2b/Pla2g6/Pde4a/Gnai2/Enpp1/Tyrobp/P2rx7/Akap12/Itpr3/Ssh1/Slc6a9/Nf1/Myo5a/Ppp3r1/Stau1/Atp2a2/Eif4ebp2/Rgs14/Ptk2b/Lnpep/Plcg1/Rab11a/Slc38a1/Iqsec2/…	93
GO:0099537	trans-synaptic signaling	307	-0.373559	-1.76774	1.03466e-06	0.000133583	0.000101935	2697	tags=37%, list=22%, signal=29%	Dvl1/Atxn1/Homer3/Sh3gl1/Ptprs/Tmod2/Mapk1/Grk2/Usp46/Rasgrf2/Fmr1/Cacna1e/Cd2ap/Prnp/Lrp6/Atad1/Rapgef4/Prkcb/Git1/Wnk1/Gls/Pirb/Spg11/Stau2/Braf/Syt11/S1pr2/Lgmn/Prkar2a/Ncstn/Itgb1/Fbxl20/Tsc2/Anxa9/Sipa1l1/Btbd9/Mtor/Stx4a/Mdm2/Rab3a/Ccr2/Mapk3/Ptpra/Bsn/Anks1b/Zmynd8/Ctnnb1/Faah/Cplx2/Cfl1/P2rx4/Camk2b/Chrnb1/Pla2g6/Pde4a/Stx2/Gnai2/Enpp1/Tyrobp/P2rx7/Akap12/Kif1b/Osbpl2/Itpr3/Ssh1/Slc6a9/Nf…	113
GO:0002064	epithelial cell development	122	-0.42264	-1.77026	0.000120254	0.00390785	0.00298203	2500	tags=39%, list=21%, signal=31%	Gpx1/Msn/Sidt2/Akap11/Fosl2/C1galt1/Fndc3a/Adamtsl4/S1pr2/Gak/Akap9/Prdm1/Ccdc88c/Arid4a/Bmp6/Clic4/Bhlha15/S1pr3/Sfn/Il6st/Hsd17b4/Smarca4/Flnb/Pdpk1/Iqgap1/Tlr9/Psap/Asxl1/F11r/Scrib/Hpse/Rapgef3/Ccm2/Rheb/Flna/Rac1/Rarg/Rock2/Vcl/Rap1a/Rap1b/Rilpl1/Add1/Vim/Myadm/Plec/Afdn	47
GO:0070527	platelet aggregation	33	-0.544811	-1.77369	0.00153304	0.0196863	0.0150224	1567	tags=39%, list=13%, signal=34%	Vps33b/Pear1/Cd9/Plek/Rap2b/Entpd1/F11r/Emilin2/Gnas/Ceacam1/Stxbp3/Il6ra/Pip5k1c	13
GO:0045779	negative regulation of bone resorption	10	-0.723833	-1.7737	0.00428865	0.0385092	0.0293858	1071	tags=30%, list=9%, signal=27%	P2rx7/Ceacam1/Gpr137b	3
GO:0046851	negative regulation of bone remodeling	10	-0.723833	-1.7737	0.00428865	0.0385092	0.0293858	1071	tags=30%, list=9%, signal=27%	P2rx7/Ceacam1/Gpr137b	3
GO:0042060	wound healing	166	-0.402923	-1.77433	2.46768e-05	0.00112268	0.000856699	1810	tags=30%, list=15%, signal=26%	Chmp3/Tec/Mtor/Cd151/Vps33b/Rab3a/Ccr2/Pear1/Myh9/Prdx2/Cd9/Plaur/Plek/Rap2b/Lrg1/Itpr3/Vegfb/Nf1/Entpd1/Clasp1/St3gal4/Adipor2/Acvrl1/Cd44/F11r/Dag1/Axl/Pten/Scrib/Emilin2/Hpse/Cdkn1a/Mrtfa/Tpm1/Rasa3/Flna/Gnas/Ceacam1/Prkce/BC004004/Eppk1/Cd36/Anxa5/Stxbp3/S100a10/Il6ra/Fcer1g/Anxa2/Plec/Pip5k1c	50
GO:0033028	myeloid cell apoptotic process	26	-0.576866	-1.77519	0.0025601	0.0277315	0.0211615	1079	tags=50%, list=9%, signal=46%	Nod2/Itgam/Stat5b/Plekho2/Nf1/Maea/Cd44/Pten/Mef2c/Lipa/St6gal1/Fcgr2b/Fcer1g	13
GO:0051924	regulation of calcium ion transport	127	-0.423078	-1.77624	6.09565e-05	0.00242658	0.00185169	1555	tags=31%, list=13%, signal=28%	Pik3cg/Ptpn22/Stac2/Ucp2/Ctnnb1/P2rx4/Slc8b1/Mcub/Pml/Gnai2/Fkbp1a/P2rx7/Ehd3/Myo5a/Ppp3r1/Kcnn4/Pdpk1/Tlr9/Ptk2b/Tmem38a/Cbarp/Ccr1/Tspan13/Plcg1/Selenon/Rapgef3/Adora2a/Ppp3ca/Gsto1/Atp2b1/Hap1/Prkce/Plcg2/Tmbim6/Tspo/Itpr1/Asph/Ahnak/Akt1/Hes1	40
GO:0003158	endothelium development	74	-0.465925	-1.77662	0.000496615	0.00930325	0.00709918	2500	tags=41%, list=21%, signal=32%	Gpx1/Msn/Krit1/Cd2ap/Akap11/Bsg/Lcn2/S1pr2/Bmp6/Clic4/Ctnnb1/Smad4/S1pr3/Acvrl1/F11r/Csnk2b/Hpse/Rapgef3/Ccm2/S1pr1/Rock2/Lipa/Ceacam1/Vcl/Rap1a/Fstl1/Rap1b/Add1/Myadm/Afdn	30
GO:0099565	chemical synaptic transmission, postsynaptic	34	-0.546326	-1.77691	0.00178373	0.0220298	0.0168106	2697	tags=53%, list=22%, signal=41%	Dvl1/Atxn1/Sh3gl1/Grk2/Fmr1/S1pr2/Anks1b/Zmynd8/P2rx4/Chrnb1/P2rx7/Ssh1/Ptk2b/Pten/Adora2a/Mef2c/Ppp3ca/Afdn	18
GO:0045576	mast cell activation	41	-0.517826	-1.77753	0.00231809	0.0262406	0.0200238	1663	tags=32%, list=14%, signal=27%	Fes/D6Wsu163e/Rasgrp1/Cplx2/Timd2/Cd48/Il4ra/Ywhaz/Pdpk1/Ptpre/Lat2/Ndrg1/Fcer1g	13
GO:0007268	chemical synaptic transmission	305	-0.376197	-1.77913	5.16204e-07	8.80681e-05	6.72036e-05	2697	tags=37%, list=22%, signal=30%	Dvl1/Atxn1/Homer3/Sh3gl1/Ptprs/Tmod2/Mapk1/Grk2/Usp46/Rasgrf2/Fmr1/Cacna1e/Cd2ap/Prnp/Lrp6/Atad1/Rapgef4/Prkcb/Git1/Wnk1/Gls/Pirb/Spg11/Stau2/Braf/Syt11/S1pr2/Lgmn/Prkar2a/Ncstn/Itgb1/Fbxl20/Tsc2/Anxa9/Sipa1l1/Btbd9/Mtor/Stx4a/Mdm2/Rab3a/Ccr2/Mapk3/Ptpra/Bsn/Anks1b/Zmynd8/Ctnnb1/Faah/Cplx2/Cfl1/P2rx4/Camk2b/Chrnb1/Pla2g6/Pde4a/Stx2/Gnai2/Enpp1/Tyrobp/P2rx7/Akap12/Kif1b/Osbpl2/Itpr3/Ssh1/Slc6a9/Nf…	113
GO:0098916	anterograde trans-synaptic signaling	305	-0.376197	-1.77913	5.16204e-07	8.80681e-05	6.72036e-05	2697	tags=37%, list=22%, signal=30%	Dvl1/Atxn1/Homer3/Sh3gl1/Ptprs/Tmod2/Mapk1/Grk2/Usp46/Rasgrf2/Fmr1/Cacna1e/Cd2ap/Prnp/Lrp6/Atad1/Rapgef4/Prkcb/Git1/Wnk1/Gls/Pirb/Spg11/Stau2/Braf/Syt11/S1pr2/Lgmn/Prkar2a/Ncstn/Itgb1/Fbxl20/Tsc2/Anxa9/Sipa1l1/Btbd9/Mtor/Stx4a/Mdm2/Rab3a/Ccr2/Mapk3/Ptpra/Bsn/Anks1b/Zmynd8/Ctnnb1/Faah/Cplx2/Cfl1/P2rx4/Camk2b/Chrnb1/Pla2g6/Pde4a/Stx2/Gnai2/Enpp1/Tyrobp/P2rx7/Akap12/Kif1b/Osbpl2/Itpr3/Ssh1/Slc6a9/Nf…	113
GO:0030038	contractile actin filament bundle assembly	62	-0.485396	-1.77989	0.000439619	0.008663	0.00661062	2314	tags=39%, list=19%, signal=32%	Rhoc/Limk1/Braf/Dnm2/Wasf2/Rgcc/Mtor/Sorbs1/Clasp1/Coro2b/Ptk2b/Ccdc88a/Arrb1/F11r/Rapgef3/Tpm1/Rac1/S1pr1/Rock2/Zyx/Pdlim1/Arhgef18/S100a10/Zeb2	24
GO:0043149	stress fiber assembly	62	-0.485396	-1.77989	0.000439619	0.008663	0.00661062	2314	tags=39%, list=19%, signal=32%	Rhoc/Limk1/Braf/Dnm2/Wasf2/Rgcc/Mtor/Sorbs1/Clasp1/Coro2b/Ptk2b/Ccdc88a/Arrb1/F11r/Rapgef3/Tpm1/Rac1/S1pr1/Rock2/Zyx/Pdlim1/Arhgef18/S100a10/Zeb2	24
GO:0072080	nephron tubule development	28	-0.567377	-1.7799	0.00225046	0.0260302	0.0198633	1360	tags=32%, list=11%, signal=29%	Cited1/Ctnnb1/Smad4/Hs2st1/Cd44/Mef2c/Lzts2/Hes1/Mtss1	9
GO:0045843	negative regulation of striated muscle tissue development	10	-0.727267	-1.78211	0.00369025	0.0349768	0.0266903	2792	tags=80%, list=23%, signal=62%	Hdac9/Luc7l/Sirt2/Hdac7/Nras/Ybx3/Hdac5/Lef1	8
GO:1901862	negative regulation of muscle tissue development	10	-0.727267	-1.78211	0.00369025	0.0349768	0.0266903	2792	tags=80%, list=23%, signal=62%	Hdac9/Luc7l/Sirt2/Hdac7/Nras/Ybx3/Hdac5/Lef1	8
GO:0150116	regulation of cell-substrate junction organization	40	-0.52557	-1.78261	0.00107286	0.0154835	0.0118152	1611	tags=38%, list=13%, signal=33%	Ldb1/Ptpra/Myh9/Cfl1/Coro1c/Iqgap1/Clasp1/Acvrl1/Dusp22/Pten/Rac1/Vcl/Map4k4/S100a10/Dusp3	15
GO:0045453	bone resorption	45	-0.510224	-1.78385	0.0011294	0.0160093	0.0122164	2411	tags=40%, list=20%, signal=32%	Itgav/Tfrc/Lrp6/Tcirg1/Fcgr4/Ctnnb1/Enpp1/P2rx7/Tpp1/Nf1/Rab7/Ptk2b/Rab3d/Rac1/S1pr1/Ceacam1/Acp5/Gpr137b	18
GO:0010811	positive regulation of cell-substrate adhesion	65	-0.479347	-1.78597	0.000576613	0.0104241	0.00795448	1419	tags=37%, list=12%, signal=33%	Rreb1/Ptprj/Cib1/Nid1/Braf/Dnm2/Itgb1/Myh9/Cass4/Cfl1/Prex1/Iqgap1/Ptk2b/Dag1/Flna/Rac1/L1cam/Jup/Prkce/Map4k4/Cd36/S100a10/Myadm/Rsu1	24
GO:0036503	ERAD pathway	93	-0.446789	-1.78831	0.000118441	0.00390201	0.00297757	2495	tags=32%, list=21%, signal=26%	Marchf6/Sec61b/Ecpas/Man1a/Fbxo17/Bag6/Fbxo6/Foxred2/Tmem259/H13/Syvn1/Erlin2/Nploc4/Ubxn1/Bcap31/Derl3/Ube4a/Man1b1/Rnf5/Edem3/Derl1/Edem1/Eif2ak3/Man1c1/Ubxn6/Man1a2/Trim25/Rnf139/Sel1l/Rcn3	30
GO:0060561	apoptotic process involved in morphogenesis	10	-0.730561	-1.79018	0.00329164	0.0321133	0.0245052	1467	tags=60%, list=12%, signal=53%	Tnfrsf1b/Bcl2l11/Pml/Ppp2r1b/Scrib/Lef1	6
GO:0048713	regulation of oligodendrocyte differentiation	22	-0.600196	-1.79214	0.00258646	0.0278905	0.0212829	1927	tags=45%, list=16%, signal=38%	Sirt2/Mtor/Tenm4/Tnfrsf1b/Ptpra/Ctnnb1/Nf1/Dag1/Rheb/Hes1	10
GO:0010761	fibroblast migration	44	-0.516027	-1.79553	0.00071691	0.0120966	0.00923073	2237	tags=43%, list=18%, signal=35%	Apc/Braf/Rcc2/Itgb1/Tsc2/Fam114a1/Pml/Akap12/Coro1c/Iqgap1/Sgpl1/Adipor2/Fut8/Rac1/Pdlim1/Prkce/Zeb2/Akt1/Plec	19
GO:0140352	export from cell	475	-0.365961	-1.79568	3.66523e-09	2.91814e-06	2.22679e-06	2459	tags=31%, list=20%, signal=26%	Fmr1/Cacna1e/Cd2ap/Atp1a1/Sidt2/Cd300a/Tmed10/Abcc4/Rapgef4/Prkcb/Vps4b/Git1/Ccdc186/Dgat1/Jagn1/Pfkm/Acsl4/Bsg/Braf/Syt11/Rgcc/Itgam/Golph3/Tcirg1/Fbxl20/Exoc5/Aacs/Cdk16/Fcgr4/Glud1/Tmf1/Abca3/Fes/Stx4a/Hmga1/D6Wsu163e/Abca1/Osbp/Rab3a/Abcg1/Ccr2/Bmp6/Tnfrsf1b/Washc5/Myh9/Rasgrp1/Ucp2/Cplx2/Smad4/Myo18a/Slc8b1/Eny2/Rab11b/Pla2g6/Plek/Stx2/Gnai2/Trpm4/Hck/Mpc2/P2rx7/C1qtnf12/Fxyd5/C2cd2l/Arfgap3…	147
GO:0000041	transition metal ion transport	62	-0.489837	-1.79617	0.000334635	0.00723326	0.0055196	2411	tags=61%, list=20%, signal=49%	Flvcr1/Slc46a3/Arhgap1/Trpm7/Slc31a1/Slc25a28/Steap3/Slc39a6/Slc30a5/Tfrc/Slc39a1/Slc25a37/Slc39a4/Ftl1/Dnm2/Lcn2/Sfxn1/Mmgt1/Slc39a13/Iscu/Slc39a10/Mcoln2/Atp2c1/Tmem165/Slc39a3/Ltf/Lmtk2/Timd2/Rab11b/Slc39a9/Mmgt2/Cltc/Slc30a6/Fth1/Slc30a7/Slc11a2/Slc48a1/Tmem163	38
GO:0016126	sterol biosynthetic process	44	-0.516239	-1.79626	0.000702052	0.0120166	0.00916974	1730	tags=30%, list=14%, signal=25%	G6pdx/Lss/Erlin2/Hmgcs1/Abcg1/Dhcr24/Por/Cyb5r1/Lpcat3/Lipa/Sqle/Srebf2/Gpr146	13
GO:1901264	carbohydrate derivative transport	54	-0.504244	-1.79705	0.000302732	0.00685379	0.00523003	1524	tags=33%, list=13%, signal=29%	Scarb1/Abcg1/Slc35a1/Spns1/Lrrc8c/P2rx7/Slc35a5/Slc35c2/Psap/Slc35c1/Pltp/Lrrc8a/Slc25a17/Ralbp1/Slc19a1/Slc17a9/Slc15a3/Calhm2	18
GO:2000047	regulation of cell-cell adhesion mediated by cadherin	11	-0.718611	-1.79771	0.00462941	0.040429	0.0308508	2047	tags=55%, list=17%, signal=45%	Rgcc/Bmp6/Dennd6a/Adam19/Flot1/Afdn	6
GO:0051693	actin filament capping	27	-0.579475	-1.79966	0.00181221	0.0223117	0.0170257	1926	tags=48%, list=16%, signal=41%	Twf2/Avil/Cfl1/Capzb/Svil/Sptbn1/Add3/Sptan1/Tpm1/Tmod3/Mtpn/Add1/Sptb	13
GO:1904889	regulation of excitatory synapse assembly	10	-0.735157	-1.80145	0.00286158	0.0295243	0.0225296	751	tags=70%, list=6%, signal=66%	Ptprs/Sipa1l1/Ptk2b/Sema4a/Clstn3/Prickle1/Cript	7
GO:0007267	cell-cell signaling	494	-0.366906	-1.80538	4.55797e-10	2.17734e-06	1.6615e-06	2356	tags=34%, list=19%, signal=28%	Usp46/Rasgrf2/Fmr1/Cacna1e/Cd2ap/Sidt2/Cd300a/Prnp/Lrp6/Atad1/Abcc4/Rapgef4/Prkcb/Git1/Ccdc186/Dgat1/Wnk1/Gls/Jagn1/Pfkm/Pirb/Acsl4/Spg11/Stau2/Braf/Syt11/S1pr2/Lgmn/Prkar2a/Ncstn/Itgb1/Tcirg1/Fbxl20/Tsc2/Anxa9/Sipa1l1/Btbd9/Aacs/Cdk16/Mtor/Glud1/Tmf1/Stx4a/Hmga1/Mdm2/Abca1/Osbp/Rab3a/Abcg1/Ccr2/Mapk3/Bmp6/Tnfrsf1b/Ptpra/Bsn/Myh9/Ucp2/Anks1b/Zmynd8/Ctnnb1/Faah/Cplx2/Smad4/Cfl1/Bhlha15/P2rx4/Camk2…	166
GO:0072006	nephron development	48	-0.509011	-1.80571	0.00117596	0.0163778	0.0124977	1360	tags=29%, list=11%, signal=26%	Cited1/Ctnnb1/Smad4/Hs2st1/Iqgap1/Asxl1/Cd44/Actn4/Mef2c/Ppp3ca/Lzts2/Il6ra/Hes1/Mtss1	14
GO:0019226	transmission of nerve impulse	16	-0.654499	-1.80583	0.00338123	0.0325647	0.0248497	2804	tags=75%, list=23%, signal=58%	Scn4a/Cacna1h/Fmr1/Cacna1e/Rapgef4/Mtor/P2rx4/P2rx7/Kcnmb3/S1pr1/Cacna1i/Plec	12
GO:0006491	N-glycan processing	12	-0.70914	-1.80707	0.00173994	0.021645	0.016517	1299	tags=50%, list=11%, signal=45%	Hexa/Gnptab/Fut8/Man2a1/Man2a2/Hexb	6
GO:0030029	actin filament-based process	411	-0.373737	-1.8078	3.22136e-09	2.91814e-06	2.22679e-06	2435	tags=32%, list=20%, signal=27%	Cd2ap/Washc2/Diaph1/Atp1a1/Actn1/Rhoc/Akap11/Daam1/Limk1/Baiap2l1/Ehd2/Myl6/Mrtfb/Prkci/Sirpa/Stau2/Mlst8/Braf/Dnm2/S1pr2/Myo9b/Wasf2/Cnn2/Fmnl1/Rgcc/Arap2/Cdc42ep4/Itgb1/Twf2/Nedd4l/Rhog/Sipa1l1/Acap2/Naa20/Abl2/Mtor/Inppl1/Akap9/Gba2/Snx9/Atp2c1/Ccdc88c/Khdc3/Avil/Jmy/Washc5/Rhof/Myh9/Arpc5/Smad4/Cfl1/Myo18a/Capzb/Shtn1/Plek/Svil/Sptbn1/Trpm4/Hck/Fmnl2/Myo1d/Sorbs1/Tyrobp/Prex1/Rhobtb2/Parvg/Ss…	133
GO:0010611	regulation of cardiac muscle hypertrophy	50	-0.510018	-1.80893	0.00086279	0.0132101	0.0100804	1730	tags=38%, list=14%, signal=33%	G6pdx/Mtor/Fbxo32/Tnfrsf1b/Ctdp1/Ece1/Smad4/Acacb/P2rx4/Cdk9/Kcnn4/Trip10/Rock2/Mef2c/Ep300/Ppp3ca/Yy1/Parp1/Mtpn	19
GO:0014743	regulation of muscle hypertrophy	50	-0.510018	-1.80893	0.00086279	0.0132101	0.0100804	1730	tags=38%, list=14%, signal=33%	G6pdx/Mtor/Fbxo32/Tnfrsf1b/Ctdp1/Ece1/Smad4/Acacb/P2rx4/Cdk9/Kcnn4/Trip10/Rock2/Mef2c/Ep300/Ppp3ca/Yy1/Parp1/Mtpn	19
GO:0030574	collagen catabolic process	12	-0.710056	-1.80941	0.00173994	0.021645	0.016517	2473	tags=67%, list=20%, signal=53%	Retreg1/Itgb1/Ctsb/Retreg2/Vsir/Adam15/Pepd/Cst3	8
GO:0032940	secretion by cell	453	-0.370431	-1.81004	1.32366e-09	2.91814e-06	2.22679e-06	2356	tags=30%, list=19%, signal=25%	Cd300a/Tmed10/Abcc4/Rapgef4/Prkcb/Vps4b/Git1/Ccdc186/Dgat1/Jagn1/Pfkm/Acsl4/Bsg/Braf/Syt11/Rgcc/Itgam/Golph3/Tcirg1/Fbxl20/Exoc5/Aacs/Cdk16/Fcgr4/Glud1/Tmf1/Fes/Stx4a/Hmga1/D6Wsu163e/Abca1/Osbp/Rab3a/Abcg1/Ccr2/Bmp6/Tnfrsf1b/Washc5/Myh9/Rasgrp1/Ucp2/Cplx2/Smad4/Myo18a/Slc8b1/Eny2/Rab11b/Pla2g6/Plek/Stx2/Gnai2/Trpm4/Hck/Mpc2/P2rx7/C1qtnf12/C2cd2l/Arfgap3/Gna11/Exoc1/Exoc8/Osbpl2/Smpd3/Vps11/Pfkl/R…	137
GO:0030834	regulation of actin filament depolymerization	37	-0.543318	-1.81094	0.00054753	0.0100987	0.00770615	1590	tags=41%, list=13%, signal=35%	Avil/Cfl1/Capzb/Plek/Svil/Sptbn1/Add3/Sptan1/Tpm1/Tmod3/Dstn/Mtpn/Add1/Sptb/Lima1	15
GO:0001974	blood vessel remodeling	23	-0.599339	-1.81243	0.00187003	0.0228746	0.0174553	1871	tags=43%, list=15%, signal=37%	Itga4/Mdm2/Ccr2/Acvrl1/Tmbim1/Axl/Flna/Mef2c/Ceacam1/Cst3	10
GO:0071526	semaphorin-plexin signaling pathway	17	-0.643409	-1.81255	0.00267938	0.0284431	0.0217045	1910	tags=59%, list=16%, signal=50%	Sema4b/Ece1/Tyrobp/Sema7a/Crmp1/Sema4a/Flna/Rac1/Plxnb2/Mef2c	10
GO:0007015	actin filament organization	267	-0.38894	-1.81336	6.87327e-07	0.000109445	8.35163e-05	2435	tags=34%, list=20%, signal=28%	Cd2ap/Washc2/Diaph1/Actn1/Rhoc/Limk1/Baiap2l1/Prkci/Sirpa/Mlst8/Braf/Dnm2/Wasf2/Cnn2/Rgcc/Cdc42ep4/Twf2/Rhog/Abl2/Mtor/Inppl1/Gba2/Snx9/Khdc3/Avil/Jmy/Washc5/Rhof/Myh9/Arpc5/Cfl1/Capzb/Shtn1/Plek/Svil/Sptbn1/Myo1d/Sorbs1/Prex1/Rhobtb2/Ssh1/Gas2l1/Myo5a/Coro1c/Iqgap1/Clasp1/Coro2b/Ptk2b/Ccdc88a/Gas7/Arrb1/Inf2/Tpm4/Add3/Rhobtb1/Actn4/F11r/Cyfip1/Hip1/Sptan1/Rapgef3/Arpc5l/Gm14137/Tpm1/Rnh1/Flna/Ra…	91
GO:0034330	cell junction organization	362	-0.377517	-1.81433	3.32136e-08	1.22047e-05	9.31324e-06	2405	tags=33%, list=20%, signal=27%	Cd2ap/Mapre2/Rps6ka5/Ube2m/Prnp/Actn1/Rhoc/Rapgef4/Daam1/Ctnna1/Prkci/Spg11/Stau2/S1pr2/Wasf2/Rcc2/Itgam/Crb3/Lgmn/Itgb1/Nedd4l/Tsc2/Pum2/Rhog/Sipa1l1/Rab29/Picalm/Cldn10/Myo9a/Abl2/Tenm4/Fkrp/Arhgap33/Ldb1/Rab3a/Bmp6/Ube3b/Abhd17c/Ptpra/Bsn/Myh9/Hdac7/Zmynd8/Ctnnb1/Cd9/Cfl1/Bhlha15/Camk2b/Chrnb1/Asap1/Dgkz/Sorbs1/Robo1/Slc39a9/Lsr/Ssh1/Mark2/Ogt/Nf1/Ywhaz/Myo5a/Coro1c/Pdpk1/Iqgap1/Sema7a/Stau1/C…	120
GO:0030204	chondroitin sulfate metabolic process	19	-0.627996	-1.81648	0.00240544	0.0267228	0.0203918	2916	tags=58%, list=24%, signal=44%	Hyal1/Xylt1/Chsy1/Chst3/Dse/Galns/Arsb/Gusb/Chst12/Chst7/Hexb	11
GO:0008202	steroid metabolic process	144	-0.420913	-1.81884	2.08514e-05	0.00100613	0.000767768	2738	tags=39%, list=22%, signal=31%	Prkaa1/Cyp11a1/Srebf1/Mapk1/Hdlbp/Cacna1h/Tecr/Atp1a1/Gh/Nfkb1/Cln6/Cyp39a1/Hsd17b11/Stat5b/Abca2/G6pdx/Gba2/Cln8/Lss/Erlin2/Abca1/Hmgcs1/Plekha1/Scarb1/Apobr/Abcg1/Bmp6/Dhcr24/Por/Hsd11b1/Cbr1/Cat/Enpp1/Npc2/Fmo5/Pip4p1/Hsd17b4/Mbtps2/Cyb5r1/Amacr/Sgpl1/Asah1/Lpcat3/Npc1/Aplp2/Fech/Ldlrap1/Lipa/Sqle/Gnb3/Tspo/Lima1/Srebf2/Dkkl1/H6pd/Gpr146	56
GO:0050818	regulation of coagulation	24	-0.59739	-1.82026	0.00231482	0.0262406	0.0200238	1397	tags=42%, list=11%, signal=37%	Prdx2/Cd9/Plaur/St3gal4/Emilin2/Hpse/Ceacam1/Cd36/Anxa5/Anxa2	10
GO:1903305	regulation of regulated secretory pathway	73	-0.478598	-1.82046	0.000121311	0.00391556	0.00298791	2697	tags=42%, list=22%, signal=33%	Dvl1/Cacna1h/Fmr1/Cacna1e/Cd300a/Prkcb/Git1/Braf/Syt11/Itgam/Fbxl20/Fes/Stx4a/D6Wsu163e/Rab3a/Ccr2/Gnai2/P2rx7/Il4ra/Pdpk1/Atp2a2/Cbarp/Itgb2/Rab3d/Ceacam1/Rap1a/Mical1/Rap1b/Stxbp3/Cacna1i/Fcer1g	31
GO:0006638	neutral lipid metabolic process	82	-0.468981	-1.82083	8.22731e-05	0.00302322	0.00230698	3083	tags=49%, list=25%, signal=37%	Abhd16a/Acsl1/Lpin2/Lypla2/Ccnc/Srebf1/Gpx1/Scd1/Plpp1/Tmem68/Dgat1/Acsl4/Daglb/Cdk8/Fitm2/Abhd12/Dgkg/Abhd2/Avil/Pik3cg/Scarb1/Apobr/Faah/Abhd5/Gpam/Il6st/Dgkz/Cat/Agpat2/Dgkh/Cnep1r1/Pla2g15/Mgll/Lipa/Pck2/Gnb3/Dgkd/Gpat3/Sel1l/Abhd6	40
GO:0006639	acylglycerol metabolic process	82	-0.468981	-1.82083	8.22731e-05	0.00302322	0.00230698	3083	tags=49%, list=25%, signal=37%	Abhd16a/Acsl1/Lpin2/Lypla2/Ccnc/Srebf1/Gpx1/Scd1/Plpp1/Tmem68/Dgat1/Acsl4/Daglb/Cdk8/Fitm2/Abhd12/Dgkg/Abhd2/Avil/Pik3cg/Scarb1/Apobr/Faah/Abhd5/Gpam/Il6st/Dgkz/Cat/Agpat2/Dgkh/Cnep1r1/Pla2g15/Mgll/Lipa/Pck2/Gnb3/Dgkd/Gpat3/Sel1l/Abhd6	40
GO:0043923	positive regulation by host of viral transcription	17	-0.646783	-1.82206	0.00242868	0.0268046	0.0204542	1410	tags=59%, list=12%, signal=52%	Ctdp1/Sp1/Tfap4/Cdk9/Smarca4/Nucks1/Taf11/Chd1/Ep300/Lef1	10
GO:0072078	nephron tubule morphogenesis	21	-0.618464	-1.82214	0.00170447	0.0213148	0.0162651	1360	tags=33%, list=11%, signal=30%	Cited1/Ctnnb1/Smad4/Hs2st1/Cd44/Lzts2/Hes1	7
GO:0008347	glial cell migration	33	-0.559915	-1.82287	0.000853372	0.0131502	0.0100347	1517	tags=39%, list=12%, signal=35%	Ccr2/Ctnnb1/Cd9/P2rx4/Enpp1/Nf1/Cers2/Scrib/Zmiz1/Tspo/Vim/Sun2/Hexb	13
GO:0030168	platelet activation	50	-0.51396	-1.82292	0.000735361	0.0122467	0.0093453	1758	tags=38%, list=14%, signal=33%	Tec/Vps33b/Pear1/Cd9/Plek/Rap2b/Itpr3/Entpd1/F11r/Axl/Emilin2/Rasa3/Flna/Gnas/Ceacam1/Stxbp3/Il6ra/Fcer1g/Pip5k1c	19
GO:0050817	coagulation	79	-0.472958	-1.824	0.000183928	0.00493609	0.00376666	1567	tags=32%, list=13%, signal=28%	Vps33b/Pear1/Prdx2/Cd9/Plaur/Plek/Rap2b/Itpr3/Entpd1/St3gal4/F11r/Axl/Emilin2/Hpse/Rasa3/Flna/Gnas/Ceacam1/Cd36/Anxa5/Stxbp3/Il6ra/Fcer1g/Anxa2/Pip5k1c	25
GO:0008610	lipid biosynthetic process	390	-0.377582	-1.82421	1.25038e-08	6.05579e-06	4.62109e-06	2413	tags=32%, list=20%, signal=26%	Atp1a1/Acaca/Fig4/Wdtc1/Gh/St8sia4/Scd1/Nfkb1/Isyna1/Acer3/Plpp1/Tmem68/Vapa/Dgat1/Acsl4/Mlst8/Serinc1/Pigb/Pigc/Cyp39a1/B4galt5/Etnk1/Hsd17b11/Sirt2/Pigh/Agps/Gpaa1/Daglb/Prxl2b/Abca2/Cers4/Fitm2/Abcd1/Dgkg/G6pdx/Mtor/Inppl1/Acsl3/Gba2/Abca3/Lss/Scd2/Erlin2/Abhd2/Gstm1/Pyurf/Cdipt/Avil/Hmgcs1/Pik3cg/Osbp/Scarb1/Abcg1/Sccpdh/Bmp6/Srd5a3/Dhcr24/Selenoi/Por/Ttc7b/Pi4ka/Acacb/Hsd11b1/Elovl6/Pla2g6/A…	123
GO:1990778	protein localization to cell periphery	233	-0.398334	-1.82591	1.40267e-06	0.00015801	0.000120575	2348	tags=33%, list=19%, signal=28%	Prnp/Lrp6/Rapgef4/Git1/Frmd8/Ehd2/Wnk1/Prkci/Bsg/Golph3/Crb3/Itgb1/Gak/Tsc2/Exoc5/Rhog/Rab29/Picalm/Abca2/Acsl3/Atp2c1/Stx4a/Fcho2/Stac2/Cnpy4/Golga4/Ttc7b/Camk2b/Sfn/Sptbn1/Sorbs1/Kif1b/Flot2/Cltc/Clip1/Ehd3/Ogt/Stx7/Myo5a/Pdpk1/Ppp2r5a/Rab7/Arl3/Myl12a/Ccdc88a/Golph3l/Efr3a/Rab11a/Tmbim1/Iqsec2/F11r/Dag1/Scrib/Flot1/Vps26b/Gga1/Flna/Rac1/L1cam/Ldlrap1/Rock2/Jup/Rap1a/Neto2/Nsf/Rilpl1/Tspan14/Ra…	78
GO:0008277	regulation of G protein-coupled receptor signaling pathway	69	-0.483252	-1.82751	0.000288685	0.00666207	0.00508373	2620	tags=43%, list=22%, signal=34%	Tmod2/Grk2/Sh2b3/Rnf113a1/Inpp5a/Git1/Gsk3a/Gpsm1/Dnm2/Itgb1/Grk5/Myh9/Ece1/Camk2b/Pde4a/Plek/Gnai2/Robo1/Pdcl/Rgs14/Arrb1/Ada/Usp33/Rgs10/Grk6/Mgll/Rock2/Ppp3ca/Kctd12/Abhd6	30
GO:0072659	protein localization to plasma membrane	191	-0.405585	-1.82975	7.47413e-06	0.000482485	0.000368178	2231	tags=32%, list=18%, signal=26%	Frmd8/Ehd2/Wnk1/Prkci/Bsg/Golph3/Crb3/Itgb1/Gak/Exoc5/Rhog/Picalm/Acsl3/Atp2c1/Stx4a/Fcho2/Stac2/Cnpy4/Golga4/Ttc7b/Camk2b/Sfn/Sptbn1/Sorbs1/Flot2/Cltc/Ehd3/Stx7/Myo5a/Pdpk1/Ppp2r5a/Rab7/Myl12a/Ccdc88a/Golph3l/Efr3a/Rab11a/Tmbim1/F11r/Scrib/Flot1/Gga1/Flna/Rac1/Ldlrap1/Rock2/Jup/Rap1a/Nsf/Rilpl1/Tspan14/Rab10/Rab31/S100a10/Rhoq/Akt1/Fcer1g/Anxa2/Ehd4/Afdn/Krt18	61
GO:0048286	lung alveolus development	30	-0.571237	-1.83015	0.000704346	0.0120166	0.00916974	2740	tags=53%, list=23%, signal=41%	Hopx/Atxn1/Gh/Fosl2/Tnrc6c/Hs6st1/Cic/Zfp157/Nkiras2/Stk40/Smpd3/Asxl1/Selenon/Ada/Man1a2/Man2a1	16
GO:0030193	regulation of blood coagulation	22	-0.61294	-1.83019	0.00151531	0.0196169	0.0149694	1397	tags=45%, list=11%, signal=40%	Prdx2/Cd9/Plaur/St3gal4/Emilin2/Hpse/Ceacam1/Cd36/Anxa5/Anxa2	10
GO:1900046	regulation of hemostasis	22	-0.61294	-1.83019	0.00151531	0.0196169	0.0149694	1397	tags=45%, list=11%, signal=40%	Prdx2/Cd9/Plaur/St3gal4/Emilin2/Hpse/Ceacam1/Cd36/Anxa5/Anxa2	10
GO:0033032	regulation of myeloid cell apoptotic process	21	-0.621596	-1.83136	0.00161234	0.0203761	0.0155487	891	tags=38%, list=7%, signal=35%	Nf1/Maea/Cd44/Pten/Mef2c/St6gal1/Fcgr2b/Fcer1g	8
GO:0018279	protein N-linked glycosylation via asparagine	34	-0.56316	-1.83167	0.000933785	0.0141161	0.0107718	2137	tags=41%, list=18%, signal=34%	Ddost/Alg12/Alg5/Alg6/Srd5a3/Alg1/Derl3/Rpn1/Magt1/Alg10b/Mgat2/Mgat1/Fut8/St6gal1	14
GO:0006487	protein N-linked glycosylation	54	-0.514463	-1.83347	0.000169568	0.00470946	0.00359372	2137	tags=39%, list=18%, signal=32%	Ddost/Alg12/Alg5/Ostc/Mlec/Alg6/Tmem165/Srd5a3/Alg1/Krtcap2/Derl3/Rpn1/Magt1/Alg10b/Mgat2/St3gal1/Mgat1/Fut8/Pmm1/Mgat4b/St6gal1	21
GO:0007009	plasma membrane organization	79	-0.4756	-1.83419	0.000161967	0.00457819	0.00349356	2283	tags=42%, list=19%, signal=34%	Vps4b/Baiap2l1/Ehd2/Dnm2/Syt11/Micall1/Chmp3/Abcd1/Snx9/Stx4a/Rab3a/Myh9/Cd9/Stx2/Asap1/Sptbn1/Sh3glb1/P2rx7/Osbpl2/Iqgap1/Psap/Atp2a2/Pten/Abca7/Flot1/Pacsin2/S100a10/Sptb/Akt1/Ndrg1/Anxa2/Plec/Mtss1	33
GO:0007596	blood coagulation	77	-0.477238	-1.83432	0.000129655	0.00407475	0.00310939	1567	tags=32%, list=13%, signal=28%	Vps33b/Pear1/Prdx2/Cd9/Plaur/Plek/Rap2b/Itpr3/Entpd1/St3gal4/F11r/Axl/Emilin2/Hpse/Rasa3/Flna/Gnas/Ceacam1/Cd36/Anxa5/Stxbp3/Il6ra/Fcer1g/Anxa2/Pip5k1c	25
GO:0001958	endochondral ossification	15	-0.673095	-1.83984	0.00367839	0.0349768	0.0266903	2390	tags=80%, list=20%, signal=64%	Alpl/Sik3/Inppl1/Bmp6/Nab2/Enpp1/Runx2/Smpd3/Mef2d/Nab1/Gnas/Mef2c	12
GO:0036075	replacement ossification	15	-0.673095	-1.83984	0.00367839	0.0349768	0.0266903	2390	tags=80%, list=20%, signal=64%	Alpl/Sik3/Inppl1/Bmp6/Nab2/Enpp1/Runx2/Smpd3/Mef2d/Nab1/Gnas/Mef2c	12
GO:0034109	homotypic cell-cell adhesion	45	-0.527361	-1.84377	0.000525196	0.00972427	0.00742046	1567	tags=38%, list=13%, signal=33%	Vps33b/Pear1/Cd9/Plaur/Plek/Rap2b/Entpd1/F11r/Emilin2/Gnas/L1cam/Ceacam1/Jup/Stxbp3/Lgals1/Il6ra/Pip5k1c	17
GO:0030282	bone mineralization	52	-0.517537	-1.84534	0.000489801	0.00924813	0.00705712	2869	tags=52%, list=24%, signal=40%	Ano6/Atraid/Lncpint/Sbds/Alpl/Fosl2/Bmpr1a/Ank/Slc20a2/Fkrp/Bmp6/Ltf/Trpm4/Enpp1/P2rx7/Runx2/Smpd3/Ptk2b/Ccr1/Eif2ak3/S1pr1/Sbno2/Mef2c/Atp2b1/Prickle1/Tent5a/Mtss1	27
GO:1902414	protein localization to cell junction	67	-0.491981	-1.85044	0.000174347	0.00475917	0.00363166	1024	tags=28%, list=8%, signal=26%	Lsr/Ogt/Stau1/Rab11a/Iqsec2/Actn4/F11r/Dag1/Scrib/Vps26b/Flna/Vcl/Abhd17b/Rap1a/Neto2/Arhgef18/Klc1/Clstn3/Afdn	19
GO:0030318	melanocyte differentiation	13	-0.709646	-1.85073	0.00148779	0.0194185	0.014818	1360	tags=46%, list=11%, signal=41%	Cited1/Enpp1/Gna11/Myo5a/Mef2c/Zeb2	6
GO:0045446	endothelial cell differentiation	62	-0.504952	-1.8516	0.000133011	0.00412592	0.00314843	1473	tags=34%, list=12%, signal=30%	Bmp6/Clic4/Ctnnb1/Smad4/S1pr3/Acvrl1/F11r/Hpse/Rapgef3/Ccm2/S1pr1/Rock2/Lipa/Ceacam1/Vcl/Rap1a/Fstl1/Rap1b/Add1/Myadm/Afdn	21
GO:0050877	nervous system process	393	-0.382991	-1.85255	2.24126e-09	2.91814e-06	2.22679e-06	2728	tags=37%, list=22%, signal=30%	Mfsd8/Rpgrip1/Dvl1/Atxn1/Homer3/Sh3gl1/Scarb2/Tmod2/Mapk1/Grk2/Crebbp/Cacna1h/Gpx1/Retreg1/Fmr1/Cacna1e/Diaph1/Fig4/Prnp/Atad1/Rapgef4/Git1/Gls/Cln6/Pirb/Rom1/Vps13b/Spg11/Braf/Syt11/Lcn2/S1pr2/Tmc4/Lgmn/Ncstn/Cep250/Itgb1/Nipbl/Picalm/Btbd9/Abl2/Rdh12/Mtor/Tenm4/Fkrp/Glud1/Cln8/Dop1b/Stx4a/Ankrd11/Rab3a/Cic/Ccr2/Mapk3/Ighmbp2/Stac2/Tnfrsf1b/Cdkn2d/Anks1b/Rdh11/Zmynd8/Lxn/P2rx4/Fabp7/Hexa/Ctsc/Ca…	145
GO:0060675	ureteric bud morphogenesis	18	-0.65166	-1.85502	0.000793542	0.0128937	0.00983902	1360	tags=39%, list=11%, signal=35%	Cited1/Ctnnb1/Smad4/Hs2st1/Cd44/Lzts2/Hes1	7
GO:0072171	mesonephric tubule morphogenesis	18	-0.65166	-1.85502	0.000793542	0.0128937	0.00983902	1360	tags=39%, list=11%, signal=35%	Cited1/Ctnnb1/Smad4/Hs2st1/Cd44/Lzts2/Hes1	7
GO:0021782	glial cell development	71	-0.4901	-1.85885	0.000181284	0.00489261	0.00373348	2053	tags=31%, list=17%, signal=26%	B4galt5/Itgam/Ncstn/Map2k2/Sirt2/Abca2/Tenm4/Mapk3/Med12/Enpp1/Nf1/Ppp3r1/Dag1/Pten/Adora2a/Mxra8/Tppp/Vim/Zeb2/Akt1/Ndrg1/Plec	22
GO:0090520	sphingolipid mediated signaling pathway	11	-0.743684	-1.86043	0.00230333	0.0262018	0.0199942	2099	tags=73%, list=17%, signal=60%	S1pr2/Pik3cg/S1pr3/Smpd3/Rac1/S1pr1/S1pr4/Akt1	8
GO:0045055	regulated exocytosis	116	-0.448726	-1.86222	1.86491e-05	0.000921771	0.000703391	2459	tags=39%, list=20%, signal=31%	Fmr1/Cacna1e/Cd300a/Tmed10/Rapgef4/Prkcb/Git1/Braf/Syt11/Itgam/Fbxl20/Fcgr4/Fes/Stx4a/D6Wsu163e/Rab3a/Ccr2/Myh9/Rasgrp1/Cplx2/Rab11b/Plek/Stx2/Gnai2/P2rx7/Osbpl2/Il4ra/Ywhaz/Pdpk1/Atp2a2/Cbarp/Efr3a/Itgb2/Rab3d/Scrib/Ceacam1/Rap1a/Mical1/Rap1b/Stxbp3/Rab10/Cacna1i/Rab31/Lat2/Fcer1g	45
GO:0007599	hemostasis	79	-0.484021	-1.86667	9.9743e-05	0.0034779	0.00265394	1567	tags=33%, list=13%, signal=29%	Vps33b/Pear1/Prdx2/Cd9/Plaur/Plek/Rap2b/Itpr3/Entpd1/St3gal4/F11r/Axl/Emilin2/Hpse/Rasa3/Flna/Zfp385a/Gnas/Ceacam1/Cd36/Anxa5/Stxbp3/Il6ra/Fcer1g/Anxa2/Pip5k1c	26
GO:0007272	ensheathment of neurons	93	-0.467555	-1.87143	2.44701e-05	0.00112268	0.000856699	2250	tags=42%, list=18%, signal=34%	Acer3/Tg/B4galt5/Ncstn/Map2k2/Sirt2/Abca2/Abcd1/Mtor/Tenm4/Cmtm8/Mapk3/Tnfrsf1b/Selenoi/Nab2/Ctnnb1/Cd9/Hexa/Ctsc/Enpp1/Nf1/Myo5a/Ppp3r1/Psap/Eif2ak3/Dag1/Pten/Cyfip1/Nab1/Rarg/Rnf10/Serinc5/Tppp/Tmem163/Srebf2/Akt1/Ndrg1/Plec/Hexb	39
GO:0008366	axon ensheathment	93	-0.467555	-1.87143	2.44701e-05	0.00112268	0.000856699	2250	tags=42%, list=18%, signal=34%	Acer3/Tg/B4galt5/Ncstn/Map2k2/Sirt2/Abca2/Abcd1/Mtor/Tenm4/Cmtm8/Mapk3/Tnfrsf1b/Selenoi/Nab2/Ctnnb1/Cd9/Hexa/Ctsc/Enpp1/Nf1/Myo5a/Ppp3r1/Psap/Eif2ak3/Dag1/Pten/Cyfip1/Nab1/Rarg/Rnf10/Serinc5/Tppp/Tmem163/Srebf2/Akt1/Ndrg1/Plec/Hexb	39
GO:0042552	myelination	93	-0.467555	-1.87143	2.44701e-05	0.00112268	0.000856699	2250	tags=42%, list=18%, signal=34%	Acer3/Tg/B4galt5/Ncstn/Map2k2/Sirt2/Abca2/Abcd1/Mtor/Tenm4/Cmtm8/Mapk3/Tnfrsf1b/Selenoi/Nab2/Ctnnb1/Cd9/Hexa/Ctsc/Enpp1/Nf1/Myo5a/Ppp3r1/Psap/Eif2ak3/Dag1/Pten/Cyfip1/Nab1/Rarg/Rnf10/Serinc5/Tppp/Tmem163/Srebf2/Akt1/Ndrg1/Plec/Hexb	39
GO:0032228	regulation of synaptic transmission, GABAergic	19	-0.647137	-1.87185	0.00103122	0.0150187	0.0114605	891	tags=37%, list=7%, signal=34%	Nf1/Slc38a1/Pten/Plcl2/Adora2a/Hap1/Prkce	7
GO:0031032	actomyosin structure organization	105	-0.461169	-1.88197	5.7308e-06	0.000402589	0.00030721	2314	tags=35%, list=19%, signal=29%	Rhoc/Limk1/Braf/Dnm2/Wasf2/Cnn2/Rgcc/Itgb1/Mtor/Myh9/Smad4/Myo18a/Sorbs1/Iqgap1/Clasp1/Coro2b/Ptk2b/Ccdc88a/Arrb1/F11r/Rapgef3/Tpm1/Rac1/Tmod3/S1pr1/Rock2/Zyx/Mef2c/Ep300/Pdlim1/Krt8/Arhgef18/S100a10/Zeb2/Myl9/Plec/Cnn3	37
GO:0044242	cellular lipid catabolic process	136	-0.439534	-1.88239	8.35496e-06	0.000525153	0.000400737	1927	tags=34%, list=16%, signal=29%	Sirt2/Acadm/Daglb/Abhd12/Abcd1/Acad9/Mtor/Gba2/Abhd2/Pik3cg/Scarb1/Acoxl/Srd5a3/Naga/Faah/Acacb/Hexa/Pla2g6/Abhd5/Gm2a/Smpd3/Hsd17b4/Amacr/Psap/Sgpl1/Ech1/Plcg1/Asah1/Neu1/Acox1/Slc25a17/Pla2g15/Crat/Mgll/Idh1/Hadh/Auh/Pck2/Plcg2/Dgkd/Acox3/Bscl2/Akt1/Abhd6/Acaa2/Hexb	46
GO:0010712	regulation of collagen metabolic process	22	-0.630899	-1.88382	0.000693315	0.0119999	0.00915694	497	tags=36%, list=4%, signal=35%	Rapgef3/Ep300/Rap1a/Vsir/Acvr1b/Vim/Il6ra/Cst3	8
GO:1904738	vascular associated smooth muscle cell migration	19	-0.651621	-1.88481	0.000835516	0.0130863	0.00998598	1871	tags=58%, list=15%, signal=49%	Itga4/Mdm2/Myh9/Enpp1/Ssh1/Nf1/Myo5a/Kcnn4/Iqgap1/Tpm1/Mef2c	11
GO:1901615	organic hydroxy compound metabolic process	254	-0.407199	-1.88844	8.08055e-08	2.27064e-05	1.73269e-05	2592	tags=34%, list=21%, signal=27%	Mapk1/Hdlbp/Cacna1h/Napepld/Idh3g/Alpl/Gdpd3/Nfkb1/Isyna1/Acer3/Plpp1/Tg/Dgat1/Cln6/Cyp39a1/Itgam/Hagh/Btbd9/Abca2/Rdh12/G6pdx/Inppl1/Fkrp/Gba2/Cln8/Lss/Erlin2/Abca1/Hmgcs1/Scarb1/Apobr/Abcg1/Bmp6/Srd5a3/Dhcr24/Myh9/Nudt4/Rdh11/Cited1/Por/Ctsb/Plek/Cat/Spr/Aco2/Ptgr1/Enpp1/Npc2/Fmo5/Pip4p1/Mbtps2/Dhrs7/Cyb5r1/Myo5a/Amacr/Synj2/Nudt3/Aldh3b1/Plcg1/Pltp/Asah1/Lpcat3/Pten/Sgpp1/Npc1/Aplp2/Plpp2/Fech…	86
GO:1901616	organic hydroxy compound catabolic process	19	-0.653393	-1.88994	0.000790354	0.0128937	0.00983902	2065	tags=42%, list=17%, signal=35%	Cyp39a1/Scarb1/Srd5a3/Synj2/Nudt3/Aldh3b1/Pten/Aldh2	8
GO:0016042	lipid catabolic process	177	-0.42468	-1.89044	8.423e-07	0.000121929	9.30426e-05	2079	tags=35%, list=17%, signal=29%	Hadhb/Cyp39a1/Hsd17b11/Sirt2/Acadm/Daglb/Fitm2/Abhd12/Abcd1/Acad9/Mtor/Gba2/Abhd2/Pik3cg/Scarb1/Acoxl/Nceh1/Srd5a3/Naga/Faah/Acacb/Hsd11b1/Hexa/Pla2g6/Abhd5/Gm2a/Smpd3/Hsd17b4/Amacr/Rab7/Psap/Sgpl1/Ech1/Plcg1/Ppt1/Asah1/Neu1/Acox1/Slc25a17/Pla2g15/Crat/Mgll/Lipa/Idh1/Hadh/Auh/Pck2/Prkce/Plcg2/Pde3b/Clstn3/Dgkd/Endou/Acox3/Oxct1/Bscl2/Naaa/Akt1/Abhd6/Acaa2/Hexb/Pafah1b3	62
GO:0009101	glycoprotein biosynthetic process	188	-0.421053	-1.89089	1.44812e-06	0.00015801	0.000120575	2879	tags=40%, list=24%, signal=31%	Stt3a/Xylt1/Ago2/B3gat3/Chsy1/B3glct/Fam20b/Chst3/Mogs/Dse/Man1a/St8sia4/Trak2/Xxylt1/C1galt1/Ddost/B4galt5/Golph3/Alg12/Ncstn/Dpy19l1/Alg5/Ostc/Abca2/Galnt6/Tet3/Fkrp/Mlec/Golga2/Hs6st1/Alg6/Tmem165/Srd5a3/Ndst1/Alg1/Ctnnb1/Krtcap2/Derl3/Hs2st1/Rpn1/B3gnt5/Vegfb/Ogt/Magt1/Man1b1/Slc35c2/Edem3/Alg10b/Mgat2/St6galnac6/St3gal4/St3gal1/Tm9sf2/Mgat1/Slc35c1/Fut8/Dpy19l3/Galnt14/Pmm1/Npc1/Abca7/Man1c1…	75
GO:0046514	ceramide catabolic process	10	-0.772625	-1.89326	0.000831221	0.0130863	0.00998598	2250	tags=80%, list=18%, signal=65%	Acer3/Gba2/Hexa/Gm2a/Psap/Asah1/Neu1/Hexb	8
GO:0050878	regulation of body fluid levels	136	-0.442622	-1.89561	6.20218e-06	0.000429389	0.00032766	1423	tags=29%, list=12%, signal=26%	Pear1/Prdx2/Cd9/Usf2/Plaur/Plek/Gnai2/Rap2b/Enpp1/Itpr3/Kcnn4/Entpd1/Zbtb7b/St3gal4/Coro2b/Ada/Eif2ak3/F11r/Madd/Axl/Emilin2/Hpse/Rasa3/Flna/Zfp385a/Gnas/Aprt/Adora2a/Ppp3ca/Ceacam1/Prkce/Cd36/Anxa5/Stxbp3/Prickle1/Il6ra/Fcer1g/Anxa2/Pip5k1c	39
GO:0034329	cell junction assembly	198	-0.420268	-1.89601	1.00522e-06	0.000133387	0.000101786	2140	tags=35%, list=18%, signal=30%	Ube2m/Actn1/Rhoc/Ctnna1/Stau2/S1pr2/Rcc2/Crb3/Itgb1/Nedd4l/Pum2/Rhog/Sipa1l1/Rab29/Cldn10/Myo9a/Fkrp/Arhgap33/Ldb1/Ube3b/Ptpra/Bsn/Myh9/Hdac7/Ctnnb1/Cd9/Cfl1/Sorbs1/Robo1/Slc39a9/Lsr/Ogt/Coro1c/Pdpk1/Iqgap1/Clasp1/Crmp1/Coro2b/Ptk2b/Acvrl1/Adgrl2/Dusp22/Iqsec2/Actn4/F11r/Pten/Zdhhc8/Sema4a/Tln1/Flot1/Rac1/L1cam/Plxnb2/Rock2/Mef2c/Hipk1/Vcl/Jup/Rap1a/Rap1b/Map4k4/Clstn3/Prickle1/S100a10/Dnm3/Adgre…	70
GO:0051893	regulation of focal adhesion assembly	35	-0.578185	-1.8977	0.000375738	0.00773663	0.00590372	1611	tags=43%, list=13%, signal=37%	Ldb1/Ptpra/Myh9/Cfl1/Coro1c/Iqgap1/Clasp1/Acvrl1/Dusp22/Pten/Rac1/Vcl/Map4k4/S100a10/Dusp3	15
GO:0090109	regulation of cell-substrate junction assembly	35	-0.578185	-1.8977	0.000375738	0.00773663	0.00590372	1611	tags=43%, list=13%, signal=37%	Ldb1/Ptpra/Myh9/Cfl1/Coro1c/Iqgap1/Clasp1/Acvrl1/Dusp22/Pten/Rac1/Vcl/Map4k4/S100a10/Dusp3	15
GO:0030042	actin filament depolymerization	40	-0.560024	-1.89947	0.000265585	0.00637536	0.00486495	1590	tags=40%, list=13%, signal=35%	Avil/Cfl1/Capzb/Plek/Svil/Sptbn1/Add3/Sptan1/Tpm1/Tmod3/Dstn/Mical1/Mtpn/Add1/Sptb/Lima1	16
GO:0007200	phospholipase C-activating G protein-coupled receptor signaling pathway	34	-0.584058	-1.89964	0.000334317	0.00723326	0.0055196	2297	tags=47%, list=19%, signal=38%	Prkcb/Inpp5a/Abl2/Dgkg/Pik3cg/Myh9/Plek/Dgkz/Gna11/Dgkh/Adora2a/S1pr1/Gnb1/Dgkd/Itpr1/Gng13	16
GO:0061326	renal tubule development	32	-0.589845	-1.9061	0.000437457	0.008663	0.00661062	1360	tags=34%, list=11%, signal=31%	Cited1/Ctnnb1/Smad4/Hs2st1/Cd44/Mef2c/Lzts2/Hdac5/Prickle1/Hes1/Mtss1	11
GO:0051017	actin filament bundle assembly	91	-0.478859	-1.90717	9.31081e-06	0.000570227	0.000435133	2339	tags=41%, list=19%, signal=33%	Actn1/Rhoc/Limk1/Baiap2l1/Braf/Dnm2/Wasf2/Rgcc/Abl2/Mtor/Myh9/Cfl1/Plek/Sorbs1/Clasp1/Coro2b/Ptk2b/Ccdc88a/Gas7/Arrb1/Actn4/F11r/Rapgef3/Tpm1/Flna/Rac1/S1pr1/Rock2/Zyx/Pdlim1/Arhgef18/Add1/Espn/S100a10/Zeb2/Lima1/Mtss1	37
GO:0014002	astrocyte development	17	-0.677539	-1.9087	0.000834172	0.0130863	0.00998598	891	tags=24%, list=7%, signal=22%	Nf1/Adora2a/Vim/Zeb2	4
GO:0006898	receptor-mediated endocytosis	155	-0.437787	-1.91671	1.43596e-06	0.00015801	0.000120575	2830	tags=45%, list=23%, signal=35%	Gpr107/Rala/Itch/Calcrl/Snx1/Itgav/Scarb2/Grk2/Usp46/Fmr1/Eps15/Cd2ap/Tfrc/Cd300a/Lrp6/Atad1/Scyl2/Dnm2/Syt11/Ifitm3/Sh3glb2/Ap2a2/Cltb/Itgam/Micall1/Itgb1/Sirt2/Gak/Nedd4l/Itga4/Picalm/Abca2/Dnajc13/Fcgr4/Snx9/Mdm2/Fcho2/Tnk2/Cd9/Clta/Cltc/Ppp3r1/Ankrd13d/Arrb1/Ppt1/Itgb2/Cd44/Cd320/Fcho1/Scrib/Hpse/Hip1/Lmbrd1/Flot1/Ralbp1/Ldlrap1/Ceacam1/Hap1/Plcg2/Nsf/Cd36/Dgkd/Rab31/Dnm3/Fcgr2b/Mrc1/Rin3/Fce…	70
GO:0014033	neural crest cell differentiation	33	-0.588796	-1.91689	0.000179517	0.00487246	0.00371811	2592	tags=52%, list=21%, signal=41%	Mapk1/Otud5/Lrp6/Bmpr1a/Sema4b/Cited2/Mapk3/Smad4/Cfl1/Pef1/Tapt1/Coro1c/Sema7a/Sema4a/Mef2c/Zeb2/Hes1	17
GO:0030323	respiratory tube development	103	-0.470509	-1.91853	9.46518e-06	0.000572344	0.000436748	2341	tags=45%, list=19%, signal=36%	Rpl13a/Hhex/Foxp4/Hopx/Atxn1/Srebf1/Mapk1/Gh/Fosl2/Bmpr1a/Bag6/Map2k2/Tnrc6c/Abca3/Hmga1/Hs6st1/Sp3/Rab3a/Cic/Cux1/Mapk3/Wwp1/Zfp157/Ctnnb1/Hsd11b1/Sp1/Nkiras2/Stk40/Tab1/Smpd3/Ywhaz/Ppp3r1/Asxl1/Selenon/Ada/Asah1/Dag1/Man1a2/Ep300/Lipa/Man2a1/Sparc/Ctsh/Rcn3/Hes1/Anxa2	46
GO:0072537	fibroblast activation	15	-0.703799	-1.92377	0.00119075	0.0164876	0.0125815	2201	tags=60%, list=18%, signal=49%	Dgat1/Gclm/Rgcc/Mdm2/Fam114a1/Gclc/Akap12/Il17ra/Zeb2	9
GO:1901136	carbohydrate derivative catabolic process	161	-0.439156	-1.92498	1.4554e-06	0.00015801	0.000120575	2270	tags=34%, list=19%, signal=28%	Git1/Pfkfb1/Fbxo17/Pfkm/Gns/Mlst8/Cbfa2t3/Fbxo6/Chil3/Pde7a/Gnpda1/Samhd1/Mtor/Fkrp/Gba2/Zbtb7a/Pfkp/Nudt4/Ucp2/Naga/Hexa/Pde4a/Gm2a/Enpp1/P2rx7/Galns/Arsb/Pfkl/Jmjd8/Ogt/Man1b1/Edem3/Ddit4/Entpd1/Nudt3/Psap/Edem1/Mgat1/Ada/Cd44/Prxl2c/Nudt9/Gusb/Neu1/Hpse/Chit1/Eno3/Ep300/Lipa/Aicda/Pfkfb3/Gpd1l/Upb1/Cst3/Hexb	55
GO:0061572	actin filament bundle organization	92	-0.483438	-1.92912	1.55143e-05	0.000842181	0.000642657	2339	tags=41%, list=19%, signal=34%	Actn1/Rhoc/Limk1/Baiap2l1/Braf/Dnm2/Wasf2/Rgcc/Abl2/Mtor/Myh9/Cfl1/Shtn1/Plek/Sorbs1/Clasp1/Coro2b/Ptk2b/Ccdc88a/Gas7/Arrb1/Actn4/F11r/Rapgef3/Tpm1/Flna/Rac1/S1pr1/Rock2/Zyx/Pdlim1/Arhgef18/Add1/Espn/S100a10/Zeb2/Lima1/Mtss1	38
GO:0048771	tissue remodeling	89	-0.48631	-1.9323	6.73365e-06	0.000446759	0.000340916	1911	tags=40%, list=16%, signal=34%	Tfrc/Lrp6/Nfkb1/Fosl2/Tcirg1/Itga4/Fcgr4/Fkrp/Mdm2/Fam114a1/Ccr2/Ctnnb1/Slc34a1/Pml/Enpp1/P2rx7/Tpp1/Nf1/Rab7/Ptk2b/Acvrl1/Tmbim1/Rab3d/Axl/Flna/Rac1/S1pr1/Rock2/Mef2c/Ppp3ca/Lipa/Ceacam1/BC004004/Acp5/Gpr137b/Cst3	36
GO:0051932	synaptic transmission, GABAergic	24	-0.634477	-1.93326	0.000573033	0.0104083	0.00794241	891	tags=38%, list=7%, signal=35%	Nf1/Slc38a1/Pten/Plcl2/Rac1/Adora2a/Hap1/Prkce/Clstn3	9
GO:0150115	cell-substrate junction organization	60	-0.529697	-1.9335	6.65072e-05	0.00262566	0.0020036	1611	tags=37%, list=13%, signal=32%	Ldb1/Ptpra/Myh9/Cfl1/Sorbs1/Coro1c/Pdpk1/Iqgap1/Clasp1/Coro2b/Ptk2b/Acvrl1/Dusp22/Pten/Tln1/Rac1/Vcl/Map4k4/Prickle1/S100a10/Plec/Dusp3	22
GO:0060541	respiratory system development	116	-0.466805	-1.93725	3.72979e-06	0.000319569	0.000243858	2341	tags=39%, list=19%, signal=32%	Gh/Lrp6/Fosl2/Bmpr1a/Bag6/Map2k2/Tnrc6c/Fkrp/Abca3/Hmga1/Hs6st1/Sp3/Rab3a/Cic/Cux1/Mapk3/Smchd1/Wwp1/Zfp157/Ctnnb1/Hsd11b1/Sp1/Nkiras2/Stk40/Tab1/Smpd3/Ywhaz/Ppp3r1/Asxl1/Selenon/Ada/Asah1/Dag1/Ass1/Rarg/Man1a2/Ep300/Lipa/Man2a1/Lef1/Sparc/Ctsh/Rcn3/Hes1/Anxa2	45
GO:0008203	cholesterol metabolic process	84	-0.495073	-1.93758	1.82126e-05	0.000915809	0.000698841	2738	tags=43%, list=22%, signal=33%	Prkaa1/Cyp11a1/Srebf1/Mapk1/Hdlbp/Cln6/Cyp39a1/Abca2/G6pdx/Gba2/Cln8/Lss/Erlin2/Abca1/Hmgcs1/Scarb1/Apobr/Abcg1/Dhcr24/Por/Cat/Npc2/Fmo5/Pip4p1/Mbtps2/Lpcat3/Npc1/Aplp2/Fech/Ldlrap1/Lipa/Sqle/Gnb3/Lima1/Srebf2/Gpr146	36
GO:0006054	N-acetylneuraminate metabolic process	11	-0.776033	-1.94136	0.000744987	0.0123142	0.00939679	1863	tags=55%, list=15%, signal=46%	Gnpda1/Cmas/Gne/St3gal1/St6gal1/Cmah	6
GO:0006013	mannose metabolic process	11	-0.776832	-1.94336	0.000711691	0.0120559	0.00919965	618	tags=45%, list=5%, signal=43%	Man2b1/Pmm1/Man1c1/Man2a1/Man2a2	5
GO:0001667	ameboidal-type cell migration	122	-0.464893	-1.94724	2.16063e-06	0.000210639	0.000160736	2122	tags=37%, list=17%, signal=31%	Braf/Wasf2/Rcc2/Itgb1/Sema4b/Tsc2/Itga4/Mcc/Mtor/Smurf2/Fam114a1/Smad4/Cfl1/Pml/Lrg1/Akap12/Arsb/Pkn1/Coro1c/Iqgap1/Sema7a/Clasp1/Sgpl1/Adipor2/Plcg1/Rab11a/Fut8/Actn4/Pten/Sema4a/Scrib/Rac1/Glipr2/Pdlim1/Prkce/Plcg2/Eppk1/Acvr1b/Map4k4/Vim/Zeb2/Ctsh/Akt1/Plec/Itgb7	45
GO:0001963	synaptic transmission, dopaminergic	11	-0.778483	-1.94749	0.000703368	0.0120166	0.00916974	477	tags=36%, list=4%, signal=35%	Flot1/Adora2a/Kcnq4/Rab3b	4
GO:0050805	negative regulation of synaptic transmission	25	-0.635806	-1.94766	0.00023407	0.00588502	0.00449078	2459	tags=56%, list=20%, signal=45%	Fmr1/Atad1/Rapgef4/Pirb/Stau2/Pla2g6/Gnai2/Myo5a/Ptk2b/Iqsec2/Pten/Mgll/Kcnq4/Abhd6	14
GO:0016125	sterol metabolic process	89	-0.49068	-1.94966	4.54873e-06	0.000355604	0.000271357	1804	tags=42%, list=15%, signal=36%	Prkaa1/Cyp11a1/Srebf1/Mapk1/Hdlbp/Cln6/Cyp39a1/Abca2/G6pdx/Gba2/Cln8/Lss/Erlin2/Abca1/Hmgcs1/Scarb1/Apobr/Abcg1/Dhcr24/Por/Cat/Npc2/Fmo5/Pip4p1/Mbtps2/Cyb5r1/Lpcat3/Npc1/Aplp2/Fech/Ldlrap1/Lipa/Sqle/Gnb3/Lima1/Srebf2/Gpr146	37
GO:0022011	myelination in peripheral nervous system	14	-0.72779	-1.95509	0.000738341	0.0122467	0.0093453	891	tags=43%, list=7%, signal=40%	Nf1/Ppp3r1/Dag1/Akt1/Ndrg1/Plec	6
GO:0032292	peripheral nervous system axon ensheathment	14	-0.72779	-1.95509	0.000738341	0.0122467	0.0093453	891	tags=43%, list=7%, signal=40%	Nf1/Ppp3r1/Dag1/Akt1/Ndrg1/Plec	6
GO:0006887	exocytosis	198	-0.434034	-1.95812	1.9083e-07	4.42966e-05	3.38021e-05	2459	tags=35%, list=20%, signal=29%	Fmr1/Cacna1e/Cd300a/Tmed10/Rapgef4/Prkcb/Vps4b/Git1/Braf/Syt11/Itgam/Fbxl20/Exoc5/Cdk16/Fcgr4/Fes/Stx4a/D6Wsu163e/Rab3a/Ccr2/Washc5/Myh9/Rasgrp1/Cplx2/Rab11b/Pla2g6/Plek/Stx2/Gnai2/Hck/P2rx7/Exoc1/Exoc8/Osbpl2/Smpd3/Vps11/Rab40c/Il4ra/Ywhaz/Myo5a/Pdpk1/Rab7/Clasp1/Atp2a2/Rab12/Cbarp/Ccr1/Efr3a/Rab11a/Itgb2/Rab3d/Scrib/Ceacam1/Hap1/Rap1a/Nsf/Mical1/Rap1b/Stxbp3/Rab10/Cacna1i/Rab31/S100a10/Atp13a2/…	70
GO:0030324	lung development	101	-0.483348	-1.95843	4.2901e-06	0.000347353	0.00026506	3003	tags=46%, list=25%, signal=35%	Rpl13a/Hhex/Foxp4/Hopx/Atxn1/Srebf1/Mapk1/Gh/Fosl2/Bmpr1a/Bag6/Map2k2/Tnrc6c/Abca3/Hmga1/Hs6st1/Sp3/Rab3a/Cic/Cux1/Mapk3/Wwp1/Zfp157/Ctnnb1/Hsd11b1/Sp1/Nkiras2/Stk40/Tab1/Smpd3/Ywhaz/Ppp3r1/Asxl1/Selenon/Ada/Asah1/Dag1/Man1a2/Ep300/Lipa/Man2a1/Sparc/Ctsh/Rcn3/Hes1/Anxa2	46
GO:0034389	lipid droplet organization	25	-0.639806	-1.95991	0.000192875	0.0050634	0.00386381	258	tags=20%, list=2%, signal=20%	Sqle/Clstn3/Plin3/Plin2/Bscl2	5
GO:0009100	glycoprotein metabolic process	221	-0.431527	-1.96236	3.13884e-08	1.22047e-05	9.31324e-06	2943	tags=40%, list=24%, signal=31%	Chp1/Hyal1/Stt3a/Xylt1/Ago2/B3gat3/Chsy1/B3glct/Fam20b/Mfsd8/Chst3/Mogs/Dse/Man1a/St8sia4/Trak2/Xxylt1/C1galt1/Fbxo17/Ddost/B4galt5/Golph3/Alg12/Fbxo6/Ncstn/Dpy19l1/Alg5/Ostc/Abca2/Galnt6/Tet3/Fkrp/Mlec/Golga2/Hs6st1/Alg6/Tmem165/Srd5a3/Ndst1/Alg1/Ctnnb1/Hexa/Krtcap2/Derl3/Galns/Arsb/Hs2st1/Rpn1/B3gnt5/Vegfb/Ogt/Magt1/Man1b1/Slc35c2/Edem3/Alg10b/Mgat2/St6galnac6/St3gal4/St3gal1/Tm9sf2/Edem1/Mgat1…	89
GO:0034104	negative regulation of tissue remodeling	13	-0.754954	-1.96889	0.00028867	0.00666207	0.00508373	1071	tags=31%, list=9%, signal=28%	P2rx7/Ceacam1/Gpr137b/Cst3	4
GO:0007186	G protein-coupled receptor signaling pathway	234	-0.429745	-1.97187	6.99818e-09	4.77576e-06	3.64432e-06	2746	tags=41%, list=23%, signal=32%	Gpr183/Npw/Calcrl/Cib1/Homer3/Tmod2/Grk2/Oxsr1/Sh2b3/Ccl22/Klf16/Rnf113a1/Rapgef4/Prkcb/Inpp5a/Git1/Gsk3a/Wnk1/Arhgef11/Pik3r6/Gpsm1/Dnm2/S1pr2/Prkar2a/Ncstn/Itgb1/Grk5/Adcy7/Ackr2/Abl2/Dgkg/Gpr160/Arhgef12/Nme2/Abca1/Pik3cg/Fam114a1/Ccr2/Vav1/Prkacb/Myh9/Ece1/Bhlha15/Camk2b/S1pr3/Igf2r/Pde4a/Plek/Gnai2/Dgkz/Robo1/Gnai3/Akap12/Slc39a9/Prex1/Gna11/Itpr3/Pdcl/Entpd1/Dgkh/Psap/Rgs14/Ptk2b/Ccr1/Arrb1…	95
GO:0017157	regulation of exocytosis	109	-0.479577	-1.97213	4.76422e-06	0.000355604	0.000271357	2459	tags=39%, list=20%, signal=31%	Fmr1/Cacna1e/Cd300a/Rapgef4/Prkcb/Vps4b/Git1/Braf/Syt11/Itgam/Fbxl20/Fes/Stx4a/D6Wsu163e/Rab3a/Ccr2/Pla2g6/Gnai2/P2rx7/Smpd3/Il4ra/Myo5a/Pdpk1/Rab7/Clasp1/Atp2a2/Cbarp/Itgb2/Rab3d/Ceacam1/Hap1/Rap1a/Nsf/Mical1/Rap1b/Stxbp3/Cacna1i/S100a10/Atp13a2/Fcer1g/Anxa2/Rab3b	42
GO:0046164	alcohol catabolic process	15	-0.721606	-1.97244	0.000592452	0.0105998	0.00808855	2065	tags=53%, list=17%, signal=44%	Cyp39a1/Scarb1/Srd5a3/Synj2/Nudt3/Aldh3b1/Pten/Aldh2	8
GO:1901888	regulation of cell junction assembly	117	-0.477317	-1.98169	1.18516e-06	0.000146618	0.000111882	2140	tags=39%, list=18%, signal=33%	Stau2/S1pr2/Rcc2/Crb3/Nedd4l/Pum2/Rhog/Sipa1l1/Arhgap33/Ldb1/Ube3b/Ptpra/Myh9/Ctnnb1/Cfl1/Robo1/Ogt/Coro1c/Iqgap1/Clasp1/Crmp1/Ptk2b/Acvrl1/Adgrl2/Dusp22/Iqsec2/F11r/Pten/Zdhhc8/Sema4a/Flot1/Rac1/L1cam/Rock2/Mef2c/Vcl/Rap1a/Rap1b/Map4k4/Clstn3/Prickle1/S100a10/Adgre5/Cript/Dusp3/Afdn	46
GO:0031623	receptor internalization	88	-0.50064	-1.98281	4.16741e-06	0.000343236	0.000261919	2808	tags=47%, list=23%, signal=36%	Rala/Itch/Calcrl/Snx1/Grk2/Usp46/Fmr1/Eps15/Tfrc/Atad1/Scyl2/Dnm2/Sh3glb2/Ap2a2/Itgb1/Sirt2/Nedd4l/Picalm/Mdm2/Cd9/Cltc/Ppp3r1/Ankrd13d/Arrb1/Itgb2/Scrib/Hip1/Lmbrd1/Flot1/Ldlrap1/Ceacam1/Hap1/Plcg2/Nsf/Cd36/Rab31/Dnm3/Rin3/Fcer1g/Anxa2/Pip5k1c	41
GO:0001952	regulation of cell-matrix adhesion	59	-0.545101	-1.98542	1.18195e-05	0.000697058	0.000531915	1611	tags=36%, list=13%, signal=31%	Ldb1/Ptpra/Myh9/Cfl1/Nf1/Coro1c/Iqgap1/Clasp1/Ptk2b/Acvrl1/Dusp22/Dag1/Pten/Rac1/Vcl/Jup/Map4k4/Cd36/Adam15/S100a10/Dusp3	21
GO:0006040	amino sugar metabolic process	30	-0.620829	-1.98904	8.58337e-05	0.00312998	0.00238845	1966	tags=40%, list=16%, signal=34%	Chil3/Gnpda1/Cmas/Gne/Ogt/St3gal1/Mgat1/Chit1/St6gal1/Chst7/Cmah/Hexb	12
GO:0001953	negative regulation of cell-matrix adhesion	11	-0.795251	-1.98944	0.000320966	0.00703327	0.00536699	891	tags=64%, list=7%, signal=59%	Rcc2/Nf1/Coro1c/Acvrl1/Dusp22/Pten/Adam15	7
GO:0006486	protein glycosylation	141	-0.46165	-1.99053	7.47949e-07	0.000111655	8.52022e-05	2396	tags=57%, list=20%, signal=46%	Tusc3/Dolpp1/Lmf1/Alg2/Nus1/B3galt6/Rxylt1/Fut11/Tmem59/Rpn2/Dpm3/B3galnt2/Galnt11/Crppa/St6galnac3/Dpagt1/Alg11/Nagpa/Galnt12/Oga/Ext2/A4galt/Galnt4/Chp1/Stt3a/B3gat3/B3glct/Mogs/Man1a/St8sia4/Trak2/Xxylt1/C1galt1/Ddost/B4galt5/Alg12/Dpy19l1/Alg5/Ostc/Abca2/Galnt6/Tet3/Fkrp/Mlec/Golga2/Alg6/Tmem165/Srd5a3/Alg1/Krtcap2/Derl3/Rpn1/B3gnt5/Vegfb/Ogt/Magt1/Man1b1/Slc35c2/Edem3/Alg10b/Mgat2/St6galnac6…	80
GO:0043413	macromolecule glycosylation	141	-0.46165	-1.99053	7.47949e-07	0.000111655	8.52022e-05	2396	tags=57%, list=20%, signal=46%	Tusc3/Dolpp1/Lmf1/Alg2/Nus1/B3galt6/Rxylt1/Fut11/Tmem59/Rpn2/Dpm3/B3galnt2/Galnt11/Crppa/St6galnac3/Dpagt1/Alg11/Nagpa/Galnt12/Oga/Ext2/A4galt/Galnt4/Chp1/Stt3a/B3gat3/B3glct/Mogs/Man1a/St8sia4/Trak2/Xxylt1/C1galt1/Ddost/B4galt5/Alg12/Dpy19l1/Alg5/Ostc/Abca2/Galnt6/Tet3/Fkrp/Mlec/Golga2/Alg6/Tmem165/Srd5a3/Alg1/Krtcap2/Derl3/Rpn1/B3gnt5/Vegfb/Ogt/Magt1/Man1b1/Slc35c2/Edem3/Alg10b/Mgat2/St6galnac6…	80
GO:0007044	cell-substrate junction assembly	53	-0.560344	-1.99786	1.75569e-05	0.000905753	0.000691167	1611	tags=40%, list=13%, signal=35%	Ldb1/Ptpra/Myh9/Cfl1/Sorbs1/Coro1c/Pdpk1/Iqgap1/Clasp1/Coro2b/Ptk2b/Acvrl1/Dusp22/Pten/Tln1/Rac1/Vcl/Map4k4/S100a10/Plec/Dusp3	21
GO:1902652	secondary alcohol metabolic process	92	-0.500871	-1.99869	3.40476e-06	0.000301195	0.000229838	2738	tags=43%, list=22%, signal=34%	Prkaa1/Cyp11a1/Srebf1/Mapk1/Hdlbp/Idh3g/Cln6/Cyp39a1/Abca2/G6pdx/Gba2/Cln8/Lss/Erlin2/Abca1/Hmgcs1/Scarb1/Apobr/Abcg1/Dhcr24/Por/Cat/Aco2/Enpp1/Npc2/Fmo5/Pip4p1/Mbtps2/Lpcat3/Npc1/Aplp2/Fech/Ldlrap1/Lipa/Idh1/Sqle/Gnb3/Lima1/Srebf2/Gpr146	40
GO:0070085	glycosylation	154	-0.457901	-1.99878	4.75008e-07	8.72735e-05	6.65972e-05	2396	tags=37%, list=20%, signal=30%	Man1a/St8sia4/Trak2/Xxylt1/C1galt1/Ddost/Pigb/B4galt5/Alg12/Dpy19l1/Alg5/Ostc/Abca2/Galnt6/Tet3/Fuom/Fkrp/Gba2/Mlec/Golga2/Alg6/Tmem165/Srd5a3/Alg1/Krtcap2/Derl3/Cog2/Cln5/Rpn1/B3gnt5/Vegfb/Ogt/Magt1/Man1b1/Slc35c2/Edem3/Alg10b/Mgat2/St6galnac6/St3gal4/St3gal1/Mgat1/Slc35c1/Fut8/Dpy19l3/Galnt14/Pmm1/Npc1/Galnt7/Man1a2/B3galt4/Mgat4b/Man2a1/St6gal1/Ggta1/Man2a2/B3gnt8	57
GO:0048041	focal adhesion assembly	48	-0.564894	-2.00395	5.00319e-05	0.00207828	0.00158591	1611	tags=40%, list=13%, signal=34%	Ldb1/Ptpra/Myh9/Cfl1/Sorbs1/Coro1c/Pdpk1/Iqgap1/Clasp1/Coro2b/Ptk2b/Acvrl1/Dusp22/Pten/Rac1/Vcl/Map4k4/S100a10/Dusp3	19
GO:0030149	sphingolipid catabolic process	16	-0.728827	-2.01091	0.000230441	0.00582441	0.00444453	2250	tags=62%, list=18%, signal=51%	Acer3/Gba2/Hexa/Gm2a/Smpd3/Psap/Sgpl1/Asah1/Neu1/Hexb	10
GO:0031018	endocrine pancreas development	17	-0.714002	-2.01143	0.000206499	0.00533213	0.00406887	1473	tags=47%, list=12%, signal=41%	Bmp6/Bhlha15/Pdpk1/Eif2ak3/Rheb/Pde3b/Il6ra/Hes1	8
GO:0071498	cellular response to fluid shear stress	13	-0.772538	-2.01475	0.00015155	0.00436295	0.0033293	751	tags=54%, list=6%, signal=51%	Socs5/Ptk2b/Ass1/Mef2c/Hdac5/Plec/Mtss1	7
GO:0046339	diacylglycerol metabolic process	18	-0.708024	-2.01547	8.73419e-05	0.00313275	0.00239056	2241	tags=56%, list=18%, signal=45%	Plpp1/Dgat1/Daglb/Dgkg/Avil/Gpam/Dgkz/Dgkh/Pla2g15/Dgkd	10
GO:0006665	sphingolipid metabolic process	83	-0.515402	-2.0179	2.64683e-06	0.00024792	0.000189184	2619	tags=49%, list=22%, signal=39%	Sirt3/Crem/Tecr/St8sia4/Acer3/Plpp1/Vapa/Cln6/Serinc1/B4galt5/Abca2/Cers4/Gba2/Cln8/Osbp/Hexa/Elovl6/Pla2g6/Gm2a/P2rx7/Cerk/Smpd3/B3gnt5/Cers2/Psap/Sgpl1/St6galnac6/St3gal1/Tm9sf2/Asah1/Neu1/Hacd3/Sgpp1/Plpp2/Cers5/Pla2g15/Paqr4/Elovl1/B3galt4/Naaa/Hexb	41
GO:0046466	membrane lipid catabolic process	19	-0.702409	-2.03172	0.000114032	0.00382163	0.00291623	1686	tags=58%, list=14%, signal=50%	Acer3/Gba2/Naga/Hexa/Gm2a/Smpd3/Psap/Sgpl1/Asah1/Neu1/Hexb	11
GO:0006654	phosphatidic acid biosynthetic process	15	-0.74883	-2.04686	0.000152412	0.00436295	0.0033293	1745	tags=60%, list=14%, signal=51%	Dgkg/Abhd5/Gpam/Dgkz/Sh3glb1/Agpat2/Dgkh/Dgkd/Bscl2	9
GO:1904861	excitatory synapse assembly	15	-0.749452	-2.04856	0.000146661	0.00432469	0.00330011	751	tags=47%, list=6%, signal=44%	Ptk2b/Pten/Sema4a/Plxnb2/Clstn3/Prickle1/Cript	7
GO:0032963	collagen metabolic process	44	-0.589453	-2.05102	1.43836e-05	0.000798958	0.000609674	2047	tags=45%, list=17%, signal=38%	Rgcc/Itgb1/Tram2/Vps33b/Ctsb/P2rx7/Smpd3/Retreg2/Rapgef3/Ep300/Rap1a/BC004004/Vsir/Acvr1b/Adam15/Pepd/Vim/Il6ra/Rcn3/Cst3	20
GO:0006672	ceramide metabolic process	61	-0.561947	-2.05878	1.64548e-06	0.000174426	0.000133102	2331	tags=49%, list=19%, signal=40%	St8sia4/Acer3/Plpp1/Cln6/B4galt5/Abca2/Cers4/Gba2/Cln8/Hexa/Pla2g6/Gm2a/P2rx7/Cerk/Smpd3/Cers2/Psap/Sgpl1/St6galnac6/St3gal1/Tm9sf2/Asah1/Neu1/Plpp2/Cers5/Pla2g15/Paqr4/Elovl1/B3galt4/Hexb	30
GO:0006066	alcohol metabolic process	185	-0.459108	-2.05992	1.18813e-08	6.05579e-06	4.62109e-06	2738	tags=39%, list=22%, signal=31%	Prkaa1/Cyp11a1/Srebf1/Mapk1/Hdlbp/Cacna1h/Napepld/Idh3g/Gdpd3/Nfkb1/Isyna1/Acer3/Plpp1/Dgat1/Cln6/Cyp39a1/Abca2/Rdh12/G6pdx/Inppl1/Fkrp/Gba2/Cln8/Lss/Erlin2/Abca1/Hmgcs1/Scarb1/Apobr/Abcg1/Bmp6/Srd5a3/Dhcr24/Myh9/Nudt4/Rdh11/Por/Plek/Cat/Spr/Aco2/Enpp1/Npc2/Fmo5/Pip4p1/Mbtps2/Dhrs7/Synj2/Nudt3/Aldh3b1/Plcg1/Asah1/Lpcat3/Pten/Sgpp1/Npc1/Aplp2/Plpp2/Fech/Ldlrap1/Lipa/Idh1/Pck2/Plcg2/Sqle/Gnb3/Aldh2…	72
GO:0034405	response to fluid shear stress	22	-0.691216	-2.06392	3.55218e-05	0.00155677	0.00118795	1673	tags=55%, list=14%, signal=47%	Socs5/Abca1/Cited2/P2rx4/P2rx7/Ptk2b/Ass1/Mef2c/Hdac5/Akt1/Plec/Mtss1	12
GO:0007160	cell-matrix adhesion	96	-0.514326	-2.06666	5.79462e-07	9.54514e-05	7.28377e-05	2151	tags=40%, list=18%, signal=33%	Sirpa/Rcc2/Itgam/Itgb1/Itga4/Ldb1/Ptpra/Myh9/Ctnnb1/Bcl2l11/Cfl1/Sorbs1/Nf1/Coro1c/Pdpk1/Iqgap1/Clasp1/Coro2b/Ptk2b/Acvrl1/Itgb2/Dusp22/Dag1/Pten/Hpse/Itga8/Rac1/L1cam/Zyx/Vcl/Jup/Map4k4/Cd36/Adam15/S100a10/Anxa2/Itgb7/Dusp3	38
GO:0061333	renal tubule morphogenesis	25	-0.682356	-2.09025	2.03109e-05	0.000990055	0.000755497	1360	tags=40%, list=11%, signal=36%	Cited1/Ctnnb1/Smad4/Hs2st1/Cd44/Mef2c/Lzts2/Hdac5/Hes1/Mtss1	10
GO:0032835	glomerulus development	22	-0.700436	-2.09145	2.1139e-05	0.00100981	0.000770571	833	tags=36%, list=7%, signal=34%	Iqgap1/Asxl1/Actn4/Mef2c/Ppp3ca/Il6ra/Hes1/Mtss1	8
GO:0031579	membrane raft organization	17	-0.744986	-2.09871	4.92076e-05	0.00206197	0.00157346	833	tags=53%, list=7%, signal=49%	Iqgap1/Ppt1/Npc1/Abca7/Flot1/Pacsin2/S100a10/Myadm/Anxa2	9
GO:0031589	cell-substrate adhesion	148	-0.499383	-2.16604	2.95039e-09	2.91814e-06	2.22679e-06	1444	tags=29%, list=12%, signal=26%	Ptpra/Myh9/Cass4/Ctnnb1/Bcl2l11/Cfl1/Sorbs1/Prex1/Parvg/Nf1/Coro1c/Pdpk1/Iqgap1/Clasp1/Coro2b/Ptk2b/Acvrl1/Itgb2/Dusp22/Actn4/Dag1/Axl/Pten/Hpse/Itga8/Flna/Rac1/L1cam/Zyx/Vcl/Jup/Prkce/Map4k4/Cd36/Adam15/St6gal1/S100a10/Myadm/Lgals1/Anxa2/Itgb7/Dusp3/Rsu1	43
GO:0055094	response to lipoprotein particle	24	-0.71142	-2.16771	8.69287e-06	0.000539297	0.00041153	1973	tags=58%, list=16%, signal=49%	Itgb1/Socs5/Hmgcs1/Cd9/Tlr6/Smpd3/Ticam1/Itgb2/Npc1/Mylip/Cd36/Srebf2/Akt1/Fcer1g	14
GO:0071404	cellular response to low-density lipoprotein particle stimulus	23	-0.721354	-2.18141	3.32359e-06	0.000299562	0.000228591	1973	tags=61%, list=16%, signal=51%	Itgb1/Socs5/Hmgcs1/Cd9/Tlr6/Smpd3/Ticam1/Itgb2/Npc1/Mylip/Cd36/Srebf2/Akt1/Fcer1g	14
GO:0071402	cellular response to lipoprotein particle stimulus	26	-0.710867	-2.18755	4.72607e-06	0.000355604	0.000271357	1973	tags=58%, list=16%, signal=48%	Itgb1/Socs5/Hmgcs1/Abcg1/Cd9/Tlr6/Smpd3/Ticam1/Itgb2/Npc1/Mylip/Cd36/Srebf2/Akt1/Fcer1g	15
GO:0010810	regulation of cell-substrate adhesion	100	-0.543543	-2.20082	1.34974e-08	6.05579e-06	4.62109e-06	1444	tags=31%, list=12%, signal=28%	Ptpra/Myh9/Cass4/Cfl1/Prex1/Nf1/Coro1c/Iqgap1/Clasp1/Coro2b/Ptk2b/Acvrl1/Dusp22/Actn4/Dag1/Pten/Flna/Rac1/L1cam/Vcl/Jup/Prkce/Map4k4/Cd36/Adam15/St6gal1/S100a10/Myadm/Lgals1/Dusp3/Rsu1	31
GO:0010812	negative regulation of cell-substrate adhesion	20	-0.773819	-2.27467	4.38551e-07	8.72735e-05	6.65972e-05	891	tags=45%, list=7%, signal=42%	Nf1/Coro1c/Coro2b/Acvrl1/Dusp22/Actn4/Pten/Adam15/Lgals1	9

## Sheet: S3E
Suppl Table S3E GSEA of hallmark gene sets in IKK2caca TCL1 lymphomas vs TCL1
positive NES = enriched in IKK2caca TCL1
ID	Description	setSize	enrichmentScore	NES	pvalue	p.adjust	qvalue	rank	leading_edge	core_enrichment	core_gene_count
HALLMARK_E2F_TARGETS	HALLMARK_E2F_TARGETS	199	0.513882	2.06094	5.0084e-10	2.5042e-08	1.318e-08	4761	tags=55%, list=20%, signal=45%	Smc4/Naa38/Tk1/Ing3/Ung/Mcm4/Rbbp7/Trp53/Mxd3/Eed/Dscc1/Pold2/Dlgap5/Plk4/Rpa3/Rpa2/Mlh1/Ilf3/Kif2c/Tubg1/Spc25/Melk/Orc6/Shmt1/Pole/Lig1/Tra2b/Tcf19/Ezh2/Spc24/Ssrp1/Bard1/Top2a/Rfc3/Ak2/Kif18b/Brca1/Tbrg4/Xpo1/Stmn1/Nme1/Srsf2/Tacc3/Nudt21/Eif2s1/Pole4/Kif4/Pcna/Kif22/Ube2t/Aurka/Hmgb2/Psmc3ip/Gins3/Dut/Rad51c/Cdkn1b/Spag5/H2ax/Dctpp1/Rfc2/Tipin/Cenpe/Birc5/Aurkb/Cdca8/Rad51ap1/Dek/Cnot9/Ccnb2/…	110
HALLMARK_INTERFERON_GAMMA_RESPONSE	HALLMARK_INTERFERON_GAMMA_RESPONSE	191	0.464324	1.86254	5.67193e-07	1.41798e-05	7.46307e-06	3875	tags=39%, list=16%, signal=33%	Cd40/Xaf1/Psmb10/Stat4/Stat1/Helz2/Sri/Nfkbia/Rtp4/Tnfaip3/Ifi27/Ddx60/Il15/Psme2/Dhx58/Epsti1/Lgals3bp/Ifi35/Rbck1/Psmb9/Psme1/Ccl5/Gbp3/Herc6/B2m/Ripk2/Arid5b/Casp4/Cxcl10/Arl4a/Nmi/Txnip/Ptpn6/Cd69/Gbp4/H2-M3/Sp110/Gch1/Irf7/Nampt/Rapgef6/H2-Q7/Pim1/Gbp9/Btg1/Casp7/H2-Eb1/H2-DMa/Lats2/Bpgm/Ifi30/Ptpn2/Tor1b/Gbp8/Cd74/Rnf213/Parp12/Ogfr/Ifit3/Casp1/Il2rb/Cmtr1/Irf1/Usp18/Stat3/Ifit1bl1/Pde4b/Il…	74
HALLMARK_MYC_TARGETS_V1	HALLMARK_MYC_TARGETS_V1	201	0.440983	1.77191	1.79826e-06	2.9971e-05	1.57742e-05	4739	tags=44%, list=20%, signal=36%	G3bp1/Snrpd1/Ifrd1/Rps5/Mcm4/Gnl3/Tyms/Apex1/Rsl1d1/Pold2/Hnrnpc/Snrpb2/Rpl34/Cct4/Ncbp2/Hnrnpa2b1/Cct3/Ube2l3/Cnbp/Psma6/Prpf31/Psmc4/Phb/Tra2b/Ptges3/Sf3a1/Cdc45/Psmb3/Hprt/Cct7/Xpo1/Npm1/Rrp9/Nme1/Snrpd2/Srsf2/Snrpa1/Rplp0/Eif2s1/Pcna/Ywhae/Dut/Stard7/Hnrnpa3/Canx/Vdac1/Rrm1/Dek/Cstf2/Psma7/Mrpl9/Hspe1/Nhp2/Srsf7/Cct2/Eif1ax/Mcm2/Mcm5/Exosc7/Got2/Orc2/Kars/Cox5a/Lsm7/Cdk4/Mcm7/Cops5/Psmb2/Ran/…	88
HALLMARK_INTERFERON_ALPHA_RESPONSE	HALLMARK_INTERFERON_ALPHA_RESPONSE	94	0.520245	1.89446	5.39777e-06	6.74721e-05	3.55116e-05	3251	tags=40%, list=13%, signal=35%	Gbp2/Nub1/Helz2/Sell/Rtp4/Ifi27/Ddx60/Il15/Oas1a/Psme2/Dhx58/Epsti1/Lgals3bp/Ifi35/Psmb9/Psme1/Gbp3/Herc6/B2m/Ripk2/Cxcl10/Csf1/Nmi/Txnip/Mov10/Sp110/Irf7/H2-Q7/Ifi30/Cd74/Parp12/Ogfr/Ifit3/Casp1/Cmtr1/Parp9/Irf1/Usp18	38
HALLMARK_ADIPOGENESIS	HALLMARK_ADIPOGENESIS	185	-0.471466	-1.73468	6.99806e-06	6.99806e-05	3.68319e-05	3361	tags=35%, list=14%, signal=30%	Rreb1/Chuk/Phldb1/Bckdha/Chchd10/Acads/Idh3g/Ptcd3/Cd302/Cavin1/Dgat1/Jagn1/Miga2/Samm50/Lifr/Acadm/Cs/Nabp1/Atl2/Rtn3/Sspn/Cd151/Abca1/Scarb1/Ucp2/Por/G3bp2/Elovl6/Ppm1b/Gpam/Cat/Aco2/Sorbs1/Bcl6/Pfkl/Vegfb/Dhrs7/Acly/Ppp1r15b/Slc1a5/Ech1/Adipor2/Esyt1/Lpcat3/Acox1/Aplp2/Mgst3/Reep5/Reep6/Crat/Mgll/Tkt/Mtarc2/Idh1/Hadh/Slc19a1/Angptl4/Cd36/Pfkfb3/Cmpk1/Aldh2/Plin2/Pqlc3/Acaa2	64
HALLMARK_MYOGENESIS	HALLMARK_MYOGENESIS	138	-0.491551	-1.74238	1.34559e-05	0.000112133	5.90173e-05	3100	tags=31%, list=13%, signal=27%	Tnnt3/Cacna1h/Pgam2/Adcy9/Pde4dip/Prnp/Scd1/Rb1/Denn2b/Pfkm/Itgb1/Sirt2/Tsc2/Gadd45b/Mapre3/Scd2/Sspn/Ablim1/Myh9/Ryr1/Camk2b/Chrnb1/Svil/Sorbs1/Itgb5/Agl/Mef2d/Cdkn1a/Sptan1/Tnni2/Crat/Ptp4a3/Eno3/Plxnb2/Ppfia4/Mef2c/Pygm/Cd36/Hdac5/Lsp1/Ckb/Sparc/Cnn3	43
HALLMARK_HEME_METABOLISM	HALLMARK_HEME_METABOLISM	183	-0.462244	-1.70025	1.62521e-05	0.000116086	6.1098e-05	4161	tags=40%, list=17%, signal=34%	Tns1/Atp6v0a1/Rnf123/H4c14/Btg2/Kel/Mpp1/Nfe2/Lpin2/Ccdc28a/Btrc/Ell2/Blvrb/Abcg2/Ppp2r5b/Add2/Fbxo9/Epor/Tfrc/Map2k3/Sidt2/Dcaf10/Slc25a37/Daam1/Trak2/Aldh6a1/Gclm/Bsg/Gypa/Top1/H1f0/Hagh/Picalm/Mospd1/Arhgef12/Slc4a1/Cir1/Hbb-bt/Tmem9b/Ranbp10/Rhag/Nudt4/Prdx2/Ucp2/Tspo2/H4c3/Gclc/Ctsb/Cat/Usp15/Ccnd3/Nek7/Ubac1/Lamp2/Mark3/Marchf2/Slc6a9/Slc10a3/Mxi1/Tnrc6b/Ctse/Klf3/Fech/Mgst3/Minpp1/Sec14l1/…	74
HALLMARK_TNFA_SIGNALING_VIA_NFKB	HALLMARK_TNFA_SIGNALING_VIA_NFKB	181	0.41938	1.67541	2.25693e-05	0.000141058	7.42413e-05	3499	tags=36%, list=14%, signal=31%	Tank/Relb/Egr2/Tnf/Rel/Nfkbia/Tnfaip3/Nfkbie/Tnip1/Ehd1/Ackr3/Bhlhe40/Cd83/Sdc4/Kynu/Nfkb2/Rela/Birc3/Tgif1/Ccnl1/Zc3h12a/Ccl5/Ifngr2/Kdm6b/B4galt1/Slc2a6/Ripk2/Nr4a2/Cxcl10/Csf1/Cd69/Dusp2/Eif1/Slc16a6/Icosl/Gch1/Map3k8/Tsc22d1/Nampt/Gadd45a/Traf1/Ppp1r15a/Btg1/Sgk1/Per1/Sqstm1/Nfat5/Dusp1/Ccl4/Pnrc1/Dnajb4/Tiparp/Slc2a3/Klf6/Rnf19b/Dennd5a/Ier5/Nr4a1/Gem/Dusp4/Klf10/Irf1/Tnfrsf9/Rhob/Pde4b	65
HALLMARK_G2M_CHECKPOINT	HALLMARK_G2M_CHECKPOINT	194	0.412781	1.65174	2.58925e-05	0.000143847	7.5709e-05	4701	tags=46%, list=19%, signal=38%	Smc4/G3bp1/Cenpf/Snrpd1/Cbx1/Plk4/Rpa2/Ilf3/Nusap1/Mnat1/Prmt5/Kif2c/Kif23/Hspa8/Orc6/Pole/Knl1/Nsd2/Tra2b/Stil/Ezh2/H2az2/Bard1/Gins2/Cdc45/Top2a/Katna1/Nup98/Xpo1/Stmn1/Hmgn2/Pafah1b1/Srsf2/Srsf10/E2f1/Tacc3/Kif4/Ewsr1/Kif22/Aurka/Kif11/Cdkn1b/Rbm14/Odf2/H2ax/Bub1/Cenpe/Birc5/Aurkb/Cdc6/Cdc27/Ccnb2/Hmmr/Plk1/Prc1/Kif15/Lig3/Mcm3/Kif20b/Exo1/Tpx2/Cdk1/Chek1/Hus1/Cks1b/Cdkn3/Mcm2/Mcm5/Pbk/Nasp/Ub…	90
HALLMARK_ANDROGEN_RESPONSE	HALLMARK_ANDROGEN_RESPONSE	90	-0.522678	-1.75754	9.22325e-05	0.000429883	0.000226254	2780	tags=42%, list=11%, signal=38%	Ell2/Elovl5/Itgav/Actn1/Scd1/Abcc4/Plpp1/Vapa/Ank/Lifr/Sec24d/Srp19/H1f0/Ccnd1/Lman1/Acsl3/Scd2/Abhd2/Hmgcs1/Dhcr24/Gnai3/Ccnd3/Akap12/Cdc14b/Camkk2/Ptk2b/Myl12a/Fkbp5/Tmem50a/Gsr/Spcs3/Zmiz1/Tpd52/Krt8/Elk4/Gpd1l/Akt1/Ndrg1	38
HALLMARK_ALLOGRAFT_REJECTION	HALLMARK_ALLOGRAFT_REJECTION	179	0.414514	1.65367	9.45743e-05	0.000429883	0.000226254	2414	tags=25%, list=10%, signal=23%	Zap70/Cd40/Lck/Ltb/Gbp2/Psmb10/Cfp/Stat4/Stat1/Tnf/Il2rg/Il15/Traf2/Cd1d1/H2-Oa/Rps9/Rps19/Il27ra/Ccl5/Ifngr2/B2m/Fyb/Ripk2/Csf1/Ptpn6/Icosl/H2-M3/Il10/Il12a/Irf7/Cd3g/Mtif2/Brca1/Hcls1/Npm1/Elane/Nme1/H2-Q7/H2-DMa/Eif5a/Sit1/Fgr/Ccl4/Cd74/Rars	45
HALLMARK_CHOLESTEROL_HOMEOSTASIS	HALLMARK_CHOLESTEROL_HOMEOSTASIS	68	-0.5468	-1.75755	0.000179563	0.000748177	0.000393778	5790	tags=53%, list=24%, signal=40%	Stx5a/Hmgcr/Ldlr/Aldoc/Pmvk/Fdft1/Trib3/Stard4/Ebp/Actg1/Nfil3/Antxr2/Sema3b/Cpeb2/Tnfrsf12a/Lgals3/Scd1/Lgmn/Fbxo6/Abca2/Lss/Scd2/Hmgcs1/Fads2/Ctnnb1/Cd9/Plaur/Trp53inp1/Atf5/Ech1/Gusb/Alcam/Ethe1/Sqle/Anxa5/Srebf2	36
HALLMARK_DNA_REPAIR	HALLMARK_DNA_REPAIR	146	0.421062	1.62472	0.000207441	0.000797849	0.000419921	4178	tags=44%, list=17%, signal=36%	Upf3b/Usp11/Pold4/Edf1/Trp53/Polb/Tyms/Gtf2a2/Supt5/Tk2/Gtf2h3/Nt5c/Rad51/Rpa3/Rpa2/Rfc5/Umps/Ncbp2/Polr2d/Arl6ip1/Lig1/Ssrp1/Taf6/Rfc3/Vps37b/Hprt/Hcls1/Cant1/Bcam/Nme1/Taf12/Ercc1/Nudt21/Dgcr8/Pole4/Pcna/Dut/Gtf2b/Rfc2/Mrpl40/Ddb2/Taf13/Npr2/Zwint/Gtf3c5/Sdcbp/Polr2i/Nfx1/Polr2h/Surf1/Rev3l/Alyref/Smad5/Pde4b/Rae1/Pola1/Ercc4/Guk1/Rad52/Ercc3/Fen1/Dguok/Prim1/Gtf2h1	64
HALLMARK_APICAL_JUNCTION	HALLMARK_APICAL_JUNCTION	156	-0.44545	-1.60705	0.00027111	0.000968252	0.000509606	3657	tags=29%, list=15%, signal=25%	Ywhah/Akt3/Cd34/Gtf2f1/Cldn4/Cldn9/Msn/Thbs3/Map4k2/Actn1/Myh10/Nectin1/Ctnna1/Sirpa/Cnn2/Crb3/Itgb1/Grb7/Cdk8/Inppl1/Map3k20/Stx4a/Arhgef6/Rhof/Myh9/Gnai2/Nf1/Gamt/Nectin2/Plcg1/Actn4/Pten/Crat/Icam2/Ldlrap1/Zyx/Vcl/Jup/Hadh/Mapk14/Adam15/Nectin4/Lima1/Myl9/Rsu1	45
HALLMARK_XENOBIOTIC_METABOLISM	HALLMARK_XENOBIOTIC_METABOLISM	161	-0.431513	-1.56299	0.000561264	0.00187088	0.000984673	3825	tags=30%, list=16%, signal=26%	Rbp4/Gss/Gnmt/Hacl1/Ccl25/Lpin2/Blvrb/Elovl5/Lonp1/Cyp27a1/Bcat1/Ddah2/Marchf6/Man1a/Nfs1/Slc6a12/Ssr3/Cyp4f14/Tnfrsf1a/Ppard/Cyp4f15/Por/Hsd11b1/Gclc/Cbr1/Dhrs1/Cat/Aco2/Ptgr1/Dhrs7/Csad/Atp2a2/Slc1a5/Ech1/Ets2/Pmm1/Npc1/Acox1/Gsr/Idh1/Jup/Gsto1/Tmbim6/Cd36/Acox3/Aldh2/Irf8/Abhd6/Upb1	49
HALLMARK_PROTEIN_SECRETION	HALLMARK_PROTEIN_SECRETION	93	-0.487224	-1.64297	0.000619158	0.00193487	0.00101835	3446	tags=32%, list=14%, signal=28%	Arfgef2/Adam10/Gbf1/Ap3s1/Mapk1/Cd63/Atp1a1/Scamp3/Tmed10/Vps4b/Ergic3/Sec24d/Lman1/Sspn/Abca1/Golga4/Ctsc/Igf2r/Cog2/Clta/Lamp2/Cln5/Arfgap3/Kif1b/Cltc/Stx7/Ppt1/Gnas/Tpd52/Krt18	30
HALLMARK_HEDGEHOG_SIGNALING	HALLMARK_HEDGEHOG_SIGNALING	26	-0.641518	-1.73225	0.00399088	0.0110858	0.00583462	3016	tags=35%, list=12%, signal=30%	Tle3/Slit1/Ldb1/Myh9/Pml/Nf1/Crmp1/Ets2/L1cam	9
HALLMARK_MYC_TARGETS_V2	HALLMARK_MYC_TARGETS_V2	58	0.477415	1.60537	0.00381159	0.0110858	0.00583462	4050	tags=50%, list=17%, signal=42%	Mphosph10/Ung/Mcm4/Gnl3/Plk4/Noc4l/Dusp2/Phb/Wdr74/Tbrg4/Npm1/Rrp9/Pus1/Dctpp1/Tcof1/Plk1/Grwd1/Prmt3/Hspe1/Ndufaf4/Rabepk/Imp4/Mrto4/Mcm5/Supv3l1/Cdk4/Mybbp1a/Nip7/Farsa	29
HALLMARK_INFLAMMATORY_RESPONSE	HALLMARK_INFLAMMATORY_RESPONSE	160	0.362431	1.42641	0.00739465	0.0194596	0.0102419	1416	tags=18%, list=6%, signal=17%	Cd40/Lta/Lck/Sri/Sell/Cybb/Nfkbia/Rtp4/Il15/Gpr132/Rela/Hpn/Ccl5/Ifngr2/Ripk2/Cxcl10/Csf1/Ccr7/Nmi/Cd69/Tnfsf15/Icosl/Ffar2/Gch1/Il10/Slc28a2/Irf7/Adm/Nampt	29
HALLMARK_COAGULATION	HALLMARK_COAGULATION	99	-0.428433	-1.45542	0.0102534	0.0256334	0.0134913	2835	tags=25%, list=12%, signal=22%	Crip2/S100a13/Casp9/Lgmn/Iscu/Sirt2/Prss23/Capn5/S100a1/Cd9/Pef1/Ctsb/Plek/Lamp2/Anxa1/Ctse/Ang/Rapgef3/Thbd/Rac1/Gnb2/Capn2/Sparc/Ctsh/Gng12	25
HALLMARK_REACTIVE_OXYGEN_SPECIES_PATHWAY	HALLMARK_REACTIVE_OXYGEN_SPECIES_PATHWAY	49	-0.496747	-1.51241	0.0167705	0.0398097	0.0209525	3816	tags=47%, list=16%, signal=40%	Gpx3/Hmox2/Hhex/Txnrd1/Oxsr1/Prnp/Prdx1/Gclm/Ftl1/Prdx4/G6pdx/Fes/Pfkp/Ndufa6/Cdkn2d/Prdx2/Gclc/Glrx/Cat/Gsr/Sbno2/Pdlim1/Lsp1	23
HALLMARK_EPITHELIAL_MESENCHYMAL_TRANSITION	HALLMARK_EPITHELIAL_MESENCHYMAL_TRANSITION	125	-0.394549	-1.38564	0.0181714	0.0398097	0.0209525	2283	tags=16%, list=9%, signal=15%	Itgb1/Gadd45b/Cd59b/Fstl3/Calu/Plaur/Pcolce/Itgb5/Ppib/Colgalt1/Tpm4/Cd44/Tpm1/Flna/Emp3/Fstl1/Vim/Sparc/Lgals1/Myl9	20
HALLMARK_FATTY_ACID_METABOLISM	HALLMARK_FATTY_ACID_METABOLISM	135	-0.387822	-1.37189	0.0183125	0.0398097	0.0209525	3960	tags=30%, list=16%, signal=26%	Mdh1/Ldha/Ube2l6/Acsl1/Mcee/Ywhah/Mlycd/Elovl5/Dlst/Erp29/Acads/Idh3g/Acsl4/Serinc1/Hadhb/Hsd17b11/Acadm/G0s2/Ostc/Hmgcs1/Dhcr24/Rdh11/Cbr1/Aco2/Hsd17b4/Acss1/Ech1/Adipor2/Acox1/Reep6/Cbr3/Crat/Mgll/Eno3/Idh1/Hadh/Auh/Cd36/S100a10/Lgals1/Acaa2	41

## Sheet: S3F
Suppl Table S3F GSEA of selected KEGG gene signatures in IKK2caca TCL1 lymphomas vs TCL1
positie NES = enriched in IKK2caca TCL1
pathway	pval	padj	log2err	ES	NES	size	leadingEdge
DNA_REPLICATION	2.27e-05	2.27e-05	0.57561	0.59964	2.12791	34	Pold4;Mcm4;Pold2;Rpa3;Rpa2;Rfc5;Pole;Lig1;Rfc3;Pole4;Pcna;Rfc2;Mcm3;Mcm2;Mcm5;Pola1;Mcm7;Fen1;Mcm6;Prim1;Prim2;Rfc4;Rnaseh1;Ssbp1;Pold1
CELL_CYCLE	2.13e-09	2.13e-09	0.774939	0.702168	2.64187	39	Trp53;Anapc13;Anapc11;Anapc10;Orc6;Cdc45;Pcna;Ywhae;Smad2;Fzr1;Bub1;Atr;Pkmyt1;Cdc6;Atm;Cdc27;Ccnb2;Plk1;Mcm3;Cdk1;Chek1;Mcm2;Mcm5;Orc2;Cdk4;Mcm7;Ccnd2;Ccna2;Ccnh;Wee1;Ccnb1;Mcm6;Cdc23;Cdc20;Tfdp1;Cdc7;Bub3;Dbf4;Orc4
FOCAL_ADHESION	1.01e-09	1.01e-09	0.788187	-0.735246	-2.52936	38	Itgb7;Akt1;Myl9;Capn2;Vcl;Zyx;Rock2;Rac1;Flna;Itga8;Tln1;Pten;Actn4;Pdpk1;Flnb;Vegfb;Parvg;Ccnd3;Ctnnb1;Mapk3;Vav1;Pak4;Itga4;Itgb1;Braf;Prkcb;Actn1;Diaph1;Thbs3;Mapk1;Itgav;Sos1;Rhoa;Raf1;Lamc1;Bad;Sos2;Prkca

## Sheet: S3G
Suppl Table S3G Richter syndrome gene signatures used for GSEA
RS_UP_TENHACKEN	RS_DOWN_TENHACKEN	RS_UP_HUMAN_TENHACKEN	RS_UP_NADEU	RS_DOWN_NADEU	RS_UP_PARRY	RS_UP_KLINTMAN
RS vs CLL (up in murine and human RS, Ten Hacken)	RS vs CLL (down in murine and human RS, Ten Hacken)	RS vs CLL (up in human RS, Ten Hacken)	RS vs CLL (up in human RS, Nadeu)	RS vs CLL (down in human RS, Nadeu)	RS vs CLL (up in human RS, Parry)	RS vs CLL (up in human RS, Klintman)
Ten Hacken et al (2023) In Vivo Modeling of CLL Transformation to Richter Syndrome Reveals Convergent Evolutionary Paths and Therapeutic Vulnerabilities			Nadeu et al (2022): Detection of early seeding of Richter transformation in chronic lymphocytic leukemia		Parry et al (2023): Evolutionary history of transformation from chronic lymphocytic leukemia to Richter syndrome.	Klintman et al (2021): Genomic and transcriptomic correlates of Richter transformation in chronic lymphocytic leukemia.
Diaph3	Bicral	Ubd	Itm2c	Megf6	NSD2	ETV1
Ncapg	Tstd1	Slco2b1	Fen1	Glul	CKAP5	POLD4
Bub1b	Mia3	Ccl18	Slc29a1	Psmd10p1	KIF22	PTTG2
Melk	Tax1bp1	Lamp5	Prdx2	Kdm7a	POLE	MGMT
Ccna2	Gga2	Col3a1	Nt5dc2	Mtss1	MCOLN2	LRP2
Ska3	Foxn3	Colec12	Amotl1	Rap1gap2	MSH6	CDK2
Cdk1	Ablim1	Aqp1	Ticrr	Dnajb13	RARS	FANCG
Tedc2	Ostf1	Gpnmb	Txn	Foxo1	CDK2	NFKBIE
Dscc1	Tmem167b	C1Qc	Dtl	Ralgps2	UQCC1	PLAU
Aurkb	Herpud2	Apoc1	Mgat3	Nr3c2	NOP16	FOS
Lrp11	Add1	A2M	Arhgef11	Jmjd1c	CDCA4	CHEK2
Mcm10	Cdc42se1	Apoc2	Icam5	Tcp11l2	POLD1	ITGA2
Top2A	Lgals1	Col6a3	Rrm2	Cbx7	GOLM1	MLH1
Nek2	Usf3	Selenop	Pycr1	Fcrl2	NDC80	BMP7
Ska1	Klf13	Lmcd1	Rad51	Xkrx	LUC7L3	SFRP4
Ckap2l	Camk1d	Thy1	Ogdhl	Ift57	EZH2	AKT2
Eme1	Arhgef18	Nupr1	Cdca7	Klf7	ATAD2	XPO1
Bub1	Sidt1	Gjc1	Slc43a3	Rgcc	PLXND1	TIAM1
Tpx2	Cd74	Dcbld2	Pax9	Hnrnpa1p27	KIF18A	CDKN1A
Cdca2	Plekhm1	Kif7	Nme4	Plch2	SCD	HRAS
Recql4	Lpp	Me3	Tert	Crybg2	RRM1	FZD7
Spc24	Dyrk1a	Ptk7	Clspn	Endou	HMGB3	TBL1XR1
Kif2c	Hsd17b11	Apoe	Gcat	Znf441	SMC4	DTX1
Ttk	Lrrk2	Cgref1	Mcm10	Ovgp1	DDX11	CTNNB1
Rad54l	Sfxn3	Ass1	Nme1	Pdcl3p5	PRC1	PRKACB
Rexo5	Nsd3	Ak4	Ldhb	Ttc21a	TK1	H3F3C
Cdc6	Itgb7	Kif14	Sap30	Cemip2	LTB4R	CUL1
Clspn	Map3k14	Rab3Il1	Nat8l	Ero1b	NFE2L3	SMC3
Cdc25c	Map3k9	Cxcl12	Wdhd1	Tsc22d3	DCAF12	DDX50
Exo1	Itpkb	Vcam1	Blvra	Map3k1	NCAPG2	CDC7
Pclaf	S1pr4	Mpzl2	Paqr4	Trim7	LOC642846	ZAK
Brip1	Crebbp	Aspm	Acot7	Fam13a	DNA2	EGR2
Mnd1	Rasgrp2	Pbk	Ldha	Glyatl1p1	KNSTRN	ALKBH2
Haspin	Susd6	Pcolce2	Gtsf1	Znf14	RRAGD	PPP2CB
Trim36	Amfr	Tfpi	Cbx8	Rasgrp2	MCM7	CDKN2C
Orc6	Cbx7	Birc7	Ccna2	Elovl5	RAD51AP1	MUTYH
Psat1	Bin1	Antxr1	Tedc2	Tagap	MAD2L1	TSHR
Ticrr	Snx29	Timp3	Aqp3	Slc44a2	CCDC34	TFDP1
Mns1	Zbtb4	A4galt	Idh2	Ptprc	CENPU	ENDOG
Cenpi	Slc44a2	Espl1	Dstn	Dpep2	ATAD5	FLNC
Chst3	Pacs1	Igfbp2	Mad2l1	Prkce	RACGAP1	CAMK2B
Brca1	Cdkn1b	Daam2	Timm22	Dpep3	PLK4	PTCH1
Hells	Lbh	Nrep	Cenpu	Adam28	GGH	TP53
Oip5	Ripor2	Tead1	Mcm3	Sp140l	NRCAM	POLR2D
Mcm4	Slc12a6	Kremen2	Vdac1	Il2ra	KIF11	TRAF7
Stil	Tgfbr2	E2f8	Ncapg	Slc43a2	RFC3	POLR2H
Racgap1	Pbxip1	C7	Gatm	Kmt2e	CHTF18	SKP1
Atad5	Bcl6	Col4a1	Cdk4	Scn4a	FEN1	HSPA2
Spdl1	Rhoh	Stc1	Mcm6	Sdk2	MYBL2	RPS27A
Ercc6l	Sell	C6Orf223	Tmem97	Arhgef10l	STIL	PBRM1
Mad2l1	Slc35d2	Cxcl13	Ncaph	Rps6ka2	SPDL1	DLL3
Nedd4	Cd82	Tert	Hmbs	Znf540	LPIN1	ERCC2
Rad51ap1	Ahnak	Hspa4l	Clec9a	Cxcr4	GINS3	NTHL1
Cenpw	Mylip	Gtse1	Cdkn2c	Rbms3	FRMD4A	CD14
Mcm7	Nuak2	Meltf-as1	Knop1	Gsap	DDX12P	CCNE1
Rnf157	Tent5a	Neil3	Septin5	Arhgap5	SLC43A3	MAP2K1
Rad51	Dopey2	Mex3a	Rrs1	Rnf41	MCM4	XRCC4
Wdhd1	Rin3	Rnf207	Cgas	Gdf7	TSPOAP1	BMPR1B
Pdss1	Fry	Bgn	Pla2g2d	Crebbp	43351	BAX
Chek1	Nr3c2	Cdc25a	Meltf	Irs2	SAP30	COL3A1
Mcm6		Tspan11	Pgam1	Adam19	GOLGA8A	TRAF3
Nfe2l3		Pard3	Gemin6	Rem2	RCN1	IL20RA
Cd3eap		Bcam	Ccdc86	Tcf4	HELLS	PRKDC
Edaradd		Kif18b	Cdc6	Per1	ARHGAP11A	FANCA
Kif18a		Aurka	Icmt	Vav3	GPSM2	MAPK8
Sgo1		Phgdh	Gmnn	Itgam	CCNF	THEM4
Cdc7		Kiaa1549	Mapk12	Lyst	SGO2	U2AF1
Dcbld1		Anln	E2f1	Plekhg1	BRCA1	HDAC1
Ccne1		Diaph3	Hirip3	Elf1	C21orf58	PKMYT1
Pcna		Tanc1	Pkmyt1	Cntnap2	CIP2A	NBN
Slc19A1		Lum	Polr2l	Il3ra	ZGRF1	PRKAR1B
Pole		Rasl10b	Eno1	Sbdsp1	CKS2	STAT1
Gcsh		Tsku	Lilra4	Secisbp2l	HASPIN	SAP130
Cenpp		Vegfc	Pclaf	Cln8	CIT	HDAC3
Minpp1		Nnmt	Ung	Dock10	WDR62	SMARCA4
Chaf1a		C1qtnf1	Jup	Rab37	GMNN	RAD21
Nr1h3		Arnt2	Cdca4	Shq1p1	SLC29A1	EZH2
Klhl42		Mmp12	Hjurp	Il4r	E2F7	MAPK9
Fancd2		Vwf	Zc3hav1l	Zc3h6	ECT2	POLB
Rtel1		Troap	Cdt1	Ermn	UHRF1	POLE2
Knop1		Nuf2	Kremen2	Usp50	STEAP3	NR4A1
Ttf2		Abcg2	Twnk	Arhgef18	TRAIP	WEE1
Mms22l		Ltbp1	Gapdh	Sf1	SMC1B	PRKACA
Slc31a1		Cnksr3	Abhd17c	Auts2	FANCI	NRAS
Tpi1		Kiaa1211	Gcsh	Lhpp	BIVM	FN1
Rrp1		Igfbp5	Mrpl12	Pygm	KIF15	HIST1H3B
Gnl3		Rnd3	Recql4	Morc3	NT5DC2	UBE2T
Mthfd2		Ncs1	Ppa1	Ncoa3	GINS2	MNAT1
Saal1		Pkdcc	Mgll	Pnpla8	PRR11	RAC1
Nars		Maoa	Kif18b	Pou6f1	ORC6	ZNF384
Nemp1		Fam72d	Ccnd2	Hbp1	TSPAN4	CASP3
Ccdc18		Mrc2	Epop	Gprasp1	ENOSF1	PCNA
Nup85		Adcy6	Epdr1	Ctsk	SHCBP1	CCNE2
Bora		Slc40a1	Trip13	Gapdhp42	E2F1	MCM2
Gdf11		Ncapg	Ubl4a	Ca3	FADS2	PARP1
Ndc1		Tmem51	E2f8	Smbd1p	HMMR	IL10
Gapdh		Polq	Tor4a	Nck2	NUSAP1	USP39
		Ccdc80	Espl1	Chd7	MND1	WNT5A
		Axl	Pdcd5	Nbpf14	BRIP1	RAD50
		Alox15b	Cdk1	Smap2	C17orf53	BRIP1
		Pald1	Uck2	Lmbr1l	CDCA8	CDC25C
		Col4a5	Aldh1b1	Angptl1	EXO1	FTSJ2
		Nfatc4	Acy3	Smchd1	SAPCD2	H2AFX
		Kdr	Nme1-nme2	Hspa7	DLG5	HSP90AA1/HSP90
		Cdca7	Mthfd1l	Phf1	GINS1	PRKAR2A
		Bub1b	Fbxo6	Large2	POLE2	PIK3R3
		Fbln1	C11orf1	Rps19p6	PAQR4	MAD2L2
		Stard4-as1	Cbx2	Efcab12	DBN1	CDC25A
		Plvap	Aars1	Btg1	ORC1	RFC3
		Cmtm8	Cenpa	Jak1	PKD2	GNG4
		Ccdc150	Comt	Ncoa2	WDR90	HDAC2
		Fblim1	Qdpr	Map2k6	REXO5	TTK
		Melk	E2f2	Grk5	CCNB2	RFC4
		Icam5	Pif1	Znf483	RAD54L	POLD1
		Pmp22	Ppil1	Tspyl2	RECQL4	HMGA1
		Slamf8	Kcp	Cep95	KIF2C	BNIP3
		Ccna2	Kif7	Ffar1	DTL	DNMT1
		Map3k20	Glrx	Iqcn	TYMS	C19orf40
		Ybx2	Mybl2	Alox5ap	FOXM1	ABL1
		Mir146a	Spn	Matn1	PLK1	MCM4
		Kif20a	Nbl1	Ly6g5b	CEP55	E2F1
		Xrcc2	Atp6v1c2	Hal	PIF1	PPP2R1A
		Ska3	Cd151	Znf675	CLSPN	MYC
		Cenpe	Kif23	Tmem71	TRIP13	CNOT10
		Col5a1	Prdx4	Ddx24	SPAG5	CCNB1
		Tyro3	Mesp1	Nr3c1	ZWINT	NFKB1
		Tnfsf11	Pkm	Ephx1	TTK	MAPK12
		Cdk1	Ube2t	Prdm4	BUB1	SPP1
		Col27a1	Nacc2	Glyatl1	TPX2	MSH6
		Gprc5B	Mki67	Selenom	FAM72B	RAD51
		Ccdc74a	Cdc45	Tle4	CENPF	MAP3K8
		Sparc	Pcna	Foxo4	MELTF	STMN1
		Dlgap5	Npm3	Sbds	SCART1	AGK
		Slc1a3	Ppp1r14b	Ssh2	CDT1	CCNA2
		Dnmt3b	Cdc25a	Abcc8	KIF23	BRCA1
		Slc25a27	Dctpp1	Oser1	FMNL2	SUV39H2
		Tm6sf1	Zwint	Zcchc7	CCNB1	GTF2H3
		Fsd1	Tyms	Ndrg1	CKAP2L	HELLS
		Nr2f2	Mcm4	Aff4	A2ML1	PTPN11
		Adgrl2	Atf5	Ca14	CDC20	CDK4
		Iqgap3	Ankrd9	Fam236b	ESCO2	CHEK1
		Kif4a	Ptp4a3	Jmy	NEK2	CDC6
		C3	Ccdc187	Lzts3	CDCA2	FEN1
		Tmem150b	Nme2	Rab30	CDC6	NOL7
		Tifab	Mrpl36	Stam	CDCA5
		Cdca3	Tmem106c	Fndc11	NECTIN1
		Phldb2	Nusap1	Peli1	TOP2A
		Tmem63c	Ctsc	Sema4b	CENPA
		Adh1b	Adamts14	Prdm2	FAM72A
		Depdc1b	Shcbp1	Zbtb21	SKA1
		Adamts9	Mrps33	Nlrp1	EME1
		C1qb	Slc25a23	Sumo2p19	FBXO43
		C3orf52	Bzw2	Selp	UBE2C
		Fbxo43	Ap2s1	Fcgr2c	CDCA3
		Ncaph	Tfdp1	Lgr6	KIFC1
		Zbed9	Rpp25	Sestd1	LOC728715
		Itih5	Ptgfrn	Fgr	KIF4A
		Strip2	Cox5a	Ca13	GPSM1
		Lpar1	Ctps1	Slc13a5	ELOVL6
		Tedc2	Rufy4	Kcnj11	BIRC5
		Met	Bid	Gpr18	MERTK
		C2orf48	Mtch2	Tmem175	NBL1
		Rgl1	Pdxp	Cdkn1b	BUB1B
		Plscr4	Kif2c	Dus2	RRM2
		Nav2	Aimp2	Zbtb10	XK
		Afap1-as1	Top2a	Oga	CENPE
		Sh3pxd2b	Pus7	Fzr1	MCM10
		Tnfaip8l3	Tkt	Rictor	DEPDC1B
		Tead3	Socs6	Gtf2ird2	AURKB
		Gas1	Iglc7	Muc20	TMEM63C
		Sardh	Cd200r1	Ttc28	XRCC2
		Dscc1	Cenpf	Rlf	KIF20A
		Fpr3	Lrp3	Nr1d2	DSCC1
		Aurkb	Epb41l1	Sfmbt1	CDCA7
		Kifc1	Plk1	Sgms1	NCAPH
		Cfh	Fam83h	Tle1	SKA3
		Lrp11	Polq	Btg2	CCNA2
		Olfml2b	Ccnb1	Trim38	NUF2
		Loc728715	Melk	Catsperg	POLQ
		Serpind1	Dscc1	Pde4b	KIAA1211
		Ror2	Pmvk	Chpt1	NCAPG
		Mcm10	Cad	Noxa1	RGL1
		Nbpf4	Ggct	Map3k9	CCDC150
		Prrx2	Jag2	Kcnh2	TM6SF1
		Nbl1	Kiaa0895l	Tead2	PHLDB2
		Slc47a1	Fahd1	Foxp1	DLGAP5
		Ube2c	Atox1	Wnt16	MRC2
		Mpp2	Pdcd2l	Heca	FAM72D
		Coro2b	Parp9	Pbxip1	MKI67
		Sparcl1	Mrps23	Slc4a5	MELK
		Afap1l1	Oip5	Ncr3	MAP3K20
		Stc2	Tst	Il10ra	ANLN
		Top2a	Tpx2	Osbpl10	SERPIND1
		Serping1	Cdca2	Cxorf65	AURKA
		Dnajc12	Gpsm1	Kcnn3	CDK1
		Nrp1	Slc1a5	Rb1cc1	TROAP
		Nek2	Cbr1	Stim2	TEDC2
		Thsd7a	Birc5	Spag4	STRIP2
		Fam3b	Tlcd3a	Usp11	C2orf48
		Cenpa	Gpr63	Phbp9	KIF18B
		C1s	Cep170b	Marchf1	ESPL1
		Ska1	Kif4a	Pcdh9	C1S
		Ctsv	Fasn	Glyatl1b	SLAMF8
		Fam72a	Aldh3b1	Usp8	DNMT3B
		Frmd6	Lage3	Clmn	CCDC74A
		Cdca5	Lrrc14b	Npap1p4	NEIL3
		Lamb2	Ube2c	Znf860	TICRR
		Aif1l	Txnrd3	Marchf8	DIAPH3
		Dnajc6	Cisd1	Rpgr	IQGAP3
		Amotl2	Rhbdd3	Tigd5	SLC1A3
		Adamts14	Fam72d	Tcte1	PALD1
		Lsamp	Arpc5	Il24	ASPM
		Ckap2l	Srxn1	Susd6	RNF207
		Plcb1	Ostc	Dlg2	MELTF-AS1
		Eme1	Cenpm	Rubcnl	SLC40A1
		Pacsin1	Tubb	Kir3dx1	GTSE1
		Foxl1	Aif1l	Cpeb4	CDC25A
		Epb41l4b	Oaf	Pi4k2a	TERT
		Inpp5J	Ada	Mc1r	KIAA1549
		Tmem145	Pm20d2	Trdv3	ABCG2
		Aplnr	Plxnb2	Lrrk2	SPARC
		Osbpl6	Cdca5	Depdc5	TNS1
		Bub1	Itga4	Dop1b	PBK
		Pxdn	Dclre1b	Usp24	HJURP
		Acvrl1	Macir	Plekha1	RASL10B
		Slc16a10	Me3	Herc3	STARD4-AS1
		B4galt6	Ckap2l	Znf350	KIF14
		Kif23	Vkorc1	Cytip	C6orf223
		Cenpf	Ggt1	Mbnl2	NREP
		Cdon	Tk1	Pcyt1a	PHGDH
		Xk	Fech	Atg9a	MEX3A
		Sez6l2	Dbn1	Setbp1	AXL
		Cachd1	Tceal8	Alox15p1	E2F8
		Rhobtb1	Sccpdh	Tnnt3	LTBP1
		Pgbd5	Slc25a27	Znf274	CNKSR3
		Spag5	Prdx3	Kcnh8	PTK7
		Mylk2	Dst	Abca5	FGF14
		Fras1	Apoo	Ric3	KREMEN2
		Fam72B	Kif14	Sirt1	GDA
		Ccnb1	Cenpw	Klhl24	MPZL2
		Npnt	Tubg1	Ctc1	C1QA
		Slc7a3	Celsr2	Tapt1	PLVAP
		Tpx2	Coa4	Rasa2	VWF
		Soat2	Rmi2	Tbxa2r	VCAM1
		Plk1	Mpst	Trib2	CD163
		Osmr	Aurka	Mtmr10	APOC2
		Trim31	Ube2l6	Apbb1	PARD3
		Cdc20	Atp5mc3	Arhgap20	COL6A3
		Dcanp1	Bola1	Fam229a	APOE
		Ddn	Gtse1	Tagln	GJC1
		Chrdl1	Slc4a11	Lmbrd1	KIF7
		Yap1	Asf1b	Snrk	CXCL13
		Etv4	Gcsam	Rrm2b	ASS1
		Birc5	Gpr150	Ets1	TSPAN11
		Pif1	Itpripl2	Dnmt3l	DAAM2
		Add2	Smim30	Slc6a16	BIRC7
		Mertk	Ggh	Gcm1	AK4
		Zwint	Kif20a	Fcrl1	AICDA
		Onecut2	Srpk1	Cdc42se1	CGREF1
		P3h3	Ahcy	Pip4p1	C1QB
		Cadm1	Cystm1	Crebrf	APOC1
		Foxm1	Canx	Ift88	THY1
		Elovl6	Nob1	Fcgr2a	CD163L1
		Mboat2	Caskin1	Snip1	CCDC80
		Fmnl2	Chaf1a	P2ry10	C3
		Cdca2	Aldh18a1	Qsox2	CXCL12
		Il10	Plcb3	Chit1	LINC01589
		Mcam	Myl12bp2	Trim73	ME3
		Ramp2-as1	Exosc5	Acsm1	DCBLD2
		H19	Mrpl34	Nbpf10	A2M
		Atp9a	Ndufa8	Usp51	ADD2
		Ablim3	Mnd1	Ypel1	GPNMB
		B3Gat1	Eef1e1	Usp15	LMCD1
		Smoc2	Mrpl51	Calcoco1	NUPR1
		Depdc7	Hmmr	Usp6nl	FABP6
		C4Orf50	Trim69	Slc12a6	C1QC
		Linc00896	Vkorc1l1	Ncbp2l	RAB3IL1
		Tspan7	Abcb6	Fcgr2b	TFPI
		Lhx2	Trip6	Pik3ca	CXCL9
		Recql4	Bub1	Mroh9	SELENOP
		Epcam	Npdc1	Ighg3	LAMP5
		Nkd2	Pthlh	Notch2	TIMP3
		Linc01094	Ndufa13	Appl2	AQP1
		Spc24	Six5	Sp100	IGFBP2
		Cdc45	Eif6	Phtf2	COLEC12
		Kif2C	Sparc	Bbs9	CCL18
		Meltf	Mrps35	Tub	COL3A1
		Calcrl	Mrpl35	Zbtb40	SLCO2B1
		Tjp1	Pak6	Wdr19	NFATC4
		Mamld1	Kif24	Zbp1	UBD
		Adamdec1	Exosc4	Cpne5	SPP1
		Mmp19	Msrb1	Tacc1
		Ttk	Coprs	Gpr3
		Ccnb2	Mrps34	Begain
		Kif26a	Smkr1	Sh3gl1p3
		Kcnj10	Isl2	Tpk1
		Krt80	Grsf1	Mbnl1
		Ppm1h	Mest	Klf8
		Wdr90	Dlgap5	Slc16a7
		Tns1	Keap1	C1orf162
		Cyr61	Scd	Sele
		Bcar1	Hdhd5	Tnrc6b
		Tyms	Pnma6a	Rcor3
		Anos1	Scamp5	Parp12
		Cep55	Pnpo	Atp2b1
		Trip13	Batf	Sgsm1
		Esco2	Wnt5a	Sult1c2
		Plcb4	Bub1b	Rel
		Dusp5p1	Nudt14	Nbea
		Loc441179	Cep55	Rps6ka5
		Rad54l	Trim45	Gabbr1
		Rexo5	Poc1a	Kynup3
		Parva	Wdr3	Natd1
		Nynrin	Ccdc34	Klk4
		Abca8	Slc37a4	Znf461
		Dab2	Timm13	Kcnn4
		Cdt1	Cit	Abtb1
		Kbtbd12	Fzd2	Pabpn1l
		Pla2G4a	Dhfrp1	Degs2
		Mki67	Znf367	Gab2
		Vangl2	Afmid	Ccnyl1
		Dtl	Rps10-nudt3	Tshz2
		Cdc6	Ppp2r3b	Add3
		Als2cl	Psmb5	Uspl1
		C1orf226	Exo1	Ypel2
		Epas1	Cdca3	Nptx1
		Pkmyt1	Erlin1	Ep300
		Cryab	Lrp8	Ddx6
		Gpsm1	Ascl1	Myo15b
		Depdc1	Ndufaf2	Bach1
		Lgi2	Lmnb1	Phf3
		Pkd2	Fxn	Zbtb37
		C14orf132	Acot13	Atm
		Grb10	Cdca8	Patl2
		Oca2	Prdx1	Ccnyl7
		Slco2a1	Paics	Apod
		Vgf	Fabp5	Arid5b
		Tymsos	Nle1	Polr2a
		Clspn	Hmga1	Gabrb2
		Nectin1	Mrpl15	Sat1
		Miox	Asmt	Rhoh
		Cdc25c	Snrpd1	Lilrb2
		Sapcd2	Tuba1b	Rgpd6
		Rtkn2	Ankrd13b	Clk1
		Lilrb5	Rnaseh2a	Mef2c
		Tmem47	Stmn1	Cd84
		C2	Kctd12	Gng7
		Tbc1d8b	Psma4	Arid4b
		Chac1	Slc12a7	Strcp1
		Linc01501	Endog	Cntd2
		Cyp1a1	Tceal9	Crybg1
		C1qa	Dgat2	Baz2a
		Htra1	Slc25a15	Epc1
		Dock3	C20orf27	Capn14
		A2ml1	Nfix	Kiaa0408
		Aicda	Ddr2	Tktl2
		Arntl2	Sod1	Znf92
		Rnase1	Znf185	Cyren
		Loc441239	Cks1b	Spopl
		Fjx1	Hgh1	Klf12
		Vsig4	Stx1a	Tubb1
		Isl2	Rrp9	Lpp
		Capn11	Imp3	Fut5
		Tmprss3	Camsap3	Traf5
		Rdm1	Msrb2	Fam238a
		Kcne4	Rwdd2b	Cd47
		Rgs4	Rcn1	Mctp2
		Or2w3	Ddtl	Samd8
		Tie1	Foxred2	Saraf
		Prss30p	Nutf2	Ube2fp3
		Aldh1a3	Lmnb2	Gna13
		Arhgap22	Banf1	Casp8
		Dapk1	Bag2	Chd2
		Ednrb	Ap1s1	Rnf38
		Pimreg	Wnt3	Mbd5
		Hmmr	Mrpl14	Rapgef6
		Stra6	Fam72b	Zdhhc20
		Mmp1	Hspa8	Zbtb20
		Nusap1	B4galt2	Ikzf5
		Rcor2	Dlg5	Or13a1
		Slc26a10	Pafah1b3	Tmem63a
		Adamts1	Rexo5	Fam3c
		Ywhaep7	Foxc1	Stxbp5
		Rai2	Ahsa1	Lcn15
		Meg3	Steap3	Lcn8
		Vwa1	Nr1i2	Cacna1f
		Loc100506688	Cdc20	Ids
		Fgf14-as2	Aspm	Rbm48
		Cdca8	Cks2	Kcnj1
		Mapk12	Nars2	Rpl32p1
		Cmklr1	Dtymk	Nipbl
		Enosf1	Ptms	Adtrp
		Kremen1	Timm23	Atxn1
		Plpp4	Isoc2	Scarf2
		Sema3a	Umps	Thra
		Il1r1	Jpt1	Jun
		Fads2	Timm8b	Kdm4c
		Glb1L2	Mrps26	Bmf
		Kitlg	Nfe2l1	Brox
		Fam153c	G3bp1	Fa2h
		Six4	Synpo	Pcgf3
		Dlg5	Kifc1	Prex1
		Scart1	Mcm2	Med21
		Grhl3	Rrp1	Ttc34
		Plxdc1	Pbk	Exd3
		Pdlim4	Hmgb3	Lcn6
		Paqr4	Clcn5	Icoslg
		Apba1	Tmed3	Rnft2
		Sult1c2	Cisd2	Slu7
		Tnfsf15	Psma2	Hla-dqb2
		Galnt18	Fanci	Bank1
		Sema3c	Cdip1	Klk1
		Eml1	Dcaf12	Zc3hav1
		Fam20a	Eef1akmt1	Ldhap2
		Phlda3	Rad51ap1	Dgcr5
		Fbln5	Aifm1	Ror1
		Il1rl1	Stt3a	Golga2p11
		Lifr	Rabepk	Fcho2
		Cxcr6	Them5	Fam214a
		Slit3	Bckdk	Ptpro
		Prr11	Cetn3	Usf3
		Nfib	Ndufab1	Dmtf1
		Tmem249	Psmd14	Plcl2
		Rai14	Sirpa	Clec2d
		Scube2	Lgals3	Ythdc1
		Exo1	Ccdc102a	Map3k3
		Ackr1	Mrps18b	Znf83
		Cd163	Slco5a1	Usp44
		Serpine2	Troap	Vpreb3
		Col24a1	Tpi1	Znf844
		Abcc9	Ptprf	Ripor2
		E2f1	Kif11	Cdkl1
		Zc3hav1l	Xk	Zbtb4
		Pclaf	Bysl	Znf101
		Ptpn3	Fabp6	Fmo5
		Sema5a	Mthfd1	Ccdc141
		Lypd6b	Stom	Kat2b
		C8orf88	H2az1	Bnip3p11
		Shank3	H2ax	Hla-b
		Igfbp6	Racgap1	Mdm4
		Ido1	Vegfa	Ppm1k
		Fam110c	Tfap2a	Zhx2
		Fat1	Esco2	Alkbh4
		Mex3b	Mrpl23	Bcl6
		Gpx8	Tsfm	Ifnar1
		Cdh1	Pelo	Dmrtc1b
		Taf7l	Fzd5	Dram2
		Hoxb6	Marcksl1	Prdx3p1
		Id4	Cenpp	Adgrv1
		Linc01561	Casp10	Abca10
		Brip1	Pdia4	Dgkd
		Neurl1b	Gnpda1	C12orf49
		Rundc3a	Nbpf13p	Cep295nl
		Orc1	Mcrip2p1	Smurf2
		Dbn1	Ccdc51	Sec22b4p
		Itln1	Ncapg2	Rock1
		Nostrin	Wdr90	Sesn3
		Adgrf5	Nol3	Ppp3cc
		Ccdc144Cp	Pgd	Klf14
		Pnmt	Atic	Lamc1
		Stab1	Fjx1	Ypel5
		Epdr1	Plekhh3	Serinc1
		Six1	Uqcc2	Drc3
		Faim2	Gcshp5	Mybpc3
		C9Orf139	Acy1	Ctrl
		Sumo1p1	Erh	Rcbtb1
		Smc1b	Ndufb3	Marf1
		Mkrn3	Hrob	Dusp1
		Mnd1	Mrpl48	Acacb
		Slc7a11	Msh6	Sema3e
		Rbpms2	Ptrh1	Ypel3
		Aunip	S100a11	Themis2
		Fam95b1	Tonsl	Sbk1
		Haspin	Arhgef35	Krt18p7
		Fanci	Naa20	Mtmr3
		43353	Strip2	Fgd3
		Isx	Ruvbl1	Smim5
		Gpr34	Foxm1	Mier1
		Kifc3	Nfatc4	Myh7b
		Kiaa1549l	Lrr1	Dusp10
		Rassf8-as1	Rtn3	Edem1
		Slc28A3	Hk2	Ankrd44
		Ephb2	Cpne7	Znf136
		Mttp	Ctnnal1	Dip2c
		Cav1	Chst7	Serpinb9
		She	Rac3	Lrrc4b
		Col13a1	Timm10	Lyn
		Adcy5	Acoxl	C12orf42
		Ccdc3	Phb	Mtmr9lp
		Trpv4	Ramp2	Ap1s3
		43346	C2cd4d	Rgpd5
		Ptpn13	Marveld1	Mrnip
		Col15a1	Ranbp1	Erp27
		Dyrk3	Anxa2	Abca1
		Adgrg2	Dse	C19orf71
		Slc29a1	Atp5pf	C17orf107
		Shroom1	Mrm1	Aff3
		Atp6V0d2	Pof1b	Mybpc2
		Hdgfl3	Vangl1	Cubn
		Loc100505635	Gins1	Tmf1
		Pole2	Apmap	Col4a3
		Fam171a1	Ccnb2	Rnf19a
		Klhl30	Miox	Znf395
		Msln	Camkk2	Linc00672
		Rhcg	Tead4	Nsa2p3
		Cyp11a1	Il15ra	Prap1
		Cdkn3	Slc12a3	Adgre4p
		Nt5dc2	Rsl1d1	Or52n4
		Haglr	Neil3	Tmem154
		Diras2	Lhx2	Ehd3
		Stxbp6	Aurkb	Ybx3
		Gcsam	Srm	Rfx2
		Lama3	Pdss1	Ccnt1
		Ramp2	Lamp5	Pnpla7
		Gins1	Nr6a1	Rapgef3
		Akr1C1	Etfa	Ttc39b
		Stbd1	Txnrd1	Muc20p1
		Ankrd22	Cst7	Mrvi1
		Tmem45a	Psme2	Znf426
		Emp2	Chpf	Plxdc1
		Otof	Or2a20p	Atxn7
		Kdelc1	Mapkapk3	Asb14
		Tff3	Mex3a	Zmat1
		Shcbp1	Lrp4	Znf19
		Fstl1	Dlx4	Smim35
		Oxer1	Micall2	Slc25a35
		Tspan6	Pxmp2	Cep126
		Nr2f1	Brca1	Cask
		Gas2l3	Dcun1d5	Inpp5k
		Slc5a9	Cenpx	Fam102a
		Ect2	Slc6a9	Lrrc70
		Poteg	Rpp40	Ceacam19
		Myo7a	Erg28	Cyb5r3
		Epyc	Slc43a1	Sptbn5
		Spc25	Septin11	Golga6a
		Necab1	Sult1a1	Kat6b
		Rrm2	Zmynd19	Fam209a
		Trim36	Tnfrsf4	Trim13
		Steap3	Eef2kmt	Eif5
		Bivm	Fkbp2	Lonrf3
		Rufy4	Pold3	E2f5
		Uhrf1	Fam72c	Gipc3
		Gng12	Ldlrad3	Aspa
		Tctex1d4	Ube2l3	Grm2
		C17orf53	Tomm40	Ankk1
		Rorc	Dhfr	Dgkg
		Linc02381	Rnf208	Bbip1
		Kiaa1522	Dnph1	Klf9
		Heyl	Socs2	Lgr4
		Xylb	Poglut3	Pyroxd1
		Cpne7	Znf511	Cntd1
		Nhsl1	Dolpp1	Prps1p2
		Mfge8	Gipc1	Itga1
		Arhgap29	Cd180	Cdk17
		Ppfia4	Ska3	Atp1a3
		Fn1	Lrrc45	Alox5
		Pkp2	Fam92a	Marchf6
		Obsl1	Arhgap11a	Dennd4c
		Pros1	Rhobtb3	Zcchc18
		Enox1	Pfkp	C11orf21
		Hjurp	Rpsap69	Znf669
		Uts2r	Gss	Piga
		Hmx2	Rpl26l1	Micu3
		Gpsm2	Mtfp1	Tlr1
		Plxnb1	Tbc1d24	Chst15
		Best3	Cdkn3	Masp2
		Tmem108	Tktl1	Synrg
		Clec3b	Sptssa	Sidt1
		E2f7	Klhl25	Cpm
		Socs6	Slc16a1	Dgka
		Gins2	Phpt1	Sptbn1
		Robo2	Tbca	Nuak2
		Adamts3	Sac3d1	Snn
		Itpripl2	Fkbp5	Mmp17
		C19orf57	Coa3	Gtf2b
		Uchl1	Dusp7	Mybl1
		Trim72	Jpt2	Kynup1
		Myb	Apex1	Cep68
		Zbed2	Smtn	Eif1b
		Cbx2	Klhl23	S1pr1
		Prrg4	Spr	Pxk
		Fam225a	Tnfaip8l2	Agk
		Hoxa5	Ndufb5	Rgs2
		Col12a1	Sigmar1	Syngr3
		Orc6	Plxnb1	Rasgef1b
		Bcas1	Pah	Cblb
		Osbpl1a	Grpel1	Gh1
		Jcad	Rbbp8	Fam183bp
		Phf24	Ifi30	Actg1p14
		Psat1	Acaa2	Wdr97
		Zgrf1	Atp6v1fnb	Slamf6
		Tspan4	Farsa	Cyp4f29p
		Me1	Mpp6	Tspan32
		Kif15	Lactb	Rpl34p22
		Tspan9	Rpp25l	R3hdm4
		Cit	Fbxo45	Nrip2
		Nes	Prmt5	Fbxo24
		Sdc4	Cd86	Reeld1
		Pls3	Mex3d	Celsr1
		Bahcc1	Ugdh	Adcy4
		Copz2	Tnfrsf17	Txlnb
		Abi3bp	C9orf64	Antxrlp1
		Cip2a	Dynlrb1	Znf484
		Gpt	Gtf2h5	Apbb2
		Pllp	C14orf132	Fam214bp1
		Svep1	C11orf98	Stx16-npepl1
		Cks2	Fam83d	Lcn10
		Wdr62	Slc38a5	Dennd11
		Znrf1	Diaph3	Trim23
		Myo10	Atp5pd	Cyp4f35p
		Amh	Prr11	Ca15p1
		Ticrr	Fstl3	Slc14a1
		Vwce	Depdc1b	Rgs17p1
		Lpin3	Rnf207	Rbm38
		Arhgef17	Tpm2	Hmgb1p20
		Pgm5	Gpatch11	Dnajb9
		Csf1	Cenpe	Tmem62
		Ctnnal1	Ddn	Ckap4
		Tmem98	Klhl35	Trpc1
		Chi3l1	Vwce	Il7r
		Sema3g	Ppt2	Rlim
		Asic1	Actl6a	Sidt2
		Chd5	Syncrip	Cfap45
		Traip	Tmem258	Tspan33
		Cyp26b1	Ier3ip1	Fam76b
		Clec12b	Arl2	Relch
		Hspb8	Mrps11	Znf318
		Acbd7	Dclre1a	Cdc14a
		Muc16	Camsap2	Tgfb2
		Linc01558	Fgf2	Zswim5
		Thpo	Clta	Col9a3
		Robo3	Mrpl1	Acbd3
		Adamts2	Cct3	Dhx16
		Ccnf	Sema7a	Gga2
		Kcne1	Psmb2	Eif2ak3
		Cdc42ep5	Prf1	Pou2f1
		Mt1L	Hdgfl2	Pld5
		Prune2	Anxa5	Zbed5
		Atp7b	Rragd	Ccdc171
		Nmu	Ttk	Mdga1
		Gfra3	Fads2	Cd200
		Micall2	Nlrx1	Znf699
		Pnma8a	Armc6	Serinc5
		Hist1h4l	Asb13	Fbxo3
		Mir138-1	Twsg1	Tiparp
		Cxcl10	Pdia5	Ddx58
		Ppp1R3c	Pttg1	Cdc25b
		Pparg	Fam189b	Gnb5
		Pkd2L1	Alkbh2	Shisal2a
		Slc37a2	Fbxo43	Nlrp9
		Intu	Cdc25c	Znf677
		Plekhh3	Mrpl24	Skor1
		Chi3l2	Eme1	Irak2
		Arhgef25	Atad3a	Hla-dpa2
		Linc01234	Mrps6	Ccsap
		Smad1	Eef1akmt4	Abca7
		Syt15	Tmem121	Man2a1
		Rcn1	Lrrc61	Naipp4
		C21orf58	Dazap1	Jarid2
		Gtf2ird1	Cstb	Hla-a
		Spef2	Cenph	Bptfp1
		Asap2	Kiaa1522	Hcrtr1
		Igf1	Pa2g4	Notch2nlc
		Ptgds	Iqgap3	Slc48a1
		Mir100hg	Nans	Mtarc1
		Slco4c1	Gar1	Nonop2
		Fam83d	Cct5	Camk2d
		Kif24	Ppif	Zzef1
		Azin2	Pdia6	Lrwd1
		Slc2a4	Ccdc167	Spock2
		Socs2-as1	Pgrmc2	Acsm3
		Lrp2	Npm1	Iglv1-51
		Pkp4	Fbxw9	Jund
		Trim54	Manea	Mogat3
		Cnih3	Plod1	Spon1
		Klhl23	Atp5md	Adgre2
		Rab42	Mtss2	C9orf72
		Nfasc	Fzd7	Marchf3
		Plcxd3	Fam161a	Calm2p2
		Tnfrsf21	Adm	Nfkbiz
		Ovol1	Polr2h	Myo9b
		Vangl1	Stxbp6	Orm2
		Ttc7b	Uqcr10	Cyp2a6
		Cxcr2p1	Bri3bp	Banf1p2
		Flt4	Gimap8	Gpr183
		Tfap2a-as1	Acot4	Rapgef5
		Mamdc4	Ctu1	Abhd17ap5
		Ctgf	Tldc2	Ephb6
		Tnc	Ndufc2	Map3k5
		Smco4	Hells	Cep85l
		Asb2	Mpzl2	Zc3h10
		Mns1	Dmc1	Tat
		Arhgap11a	Mrps2	Galnt5
		Psrc1	Slc25a10	Mapk4
		Pir	Got2	Bcrp2
		Nme5	Spag5	Rnpc3
		Linc00649	Pacc1	Skil
		Nckap1	Tmem14c	Enc1
		Adamts17	Vdac3	Phc3
		Nutm2f	Cnih1	Swap70
		Cx3cl1	Ebpl	Aplp2
		Phka1	Thoc7	Rps12p3
		Ca9	Tuba1c	Arid4a
		C3orf80	Npas2	Cacna2d2
		Twist1	Cybrd1	Trmo
		Sulf1	Kdsr	Foxo3b
		Rassf8	Tmem54	Fem1c
		Ccl23	Bcat2	Xrn1
		Mab21l3	Kbtbd6	Dnah10
		Csag1	Ctsb	Arntl
		Dpcd	Mtco1p12	Stmn3
		Loc100506691	Incenp	Ppp1r3e
		Tspoap1	Gp1bb	Disp1
		Slit2	Homer3	Rnasel
		Gpc3	Lamtor2	Kdm3a
		Gja3	Eif4e3	Cgrrf1
		Mreg	Tmem161a	Proc
		Trim55	Cfap157	Znf266
		Scarna22	Uhrf1	Dapk2
		Ttc16	Elavl1	Cab39l
		Sncaip	Atp5mc1	Hla-dma
		Lypd5	Dnmt3b	Dcst2
		Sgo2	Metap1d	Znf300
		Gmnn	Chek1	Pgam2
		Snora50c	Wdr12	Elfn2
		Kiaa1324	Pak1	Ubxn7
		Kcnh4	Utp11	Tssk3
		Hfm1	Ndufa12	Btnl2
		Il4i1	Fndc10	Cdnf
		Sap30	Psmc3ip	Cped1
		Mir17Hg	Ndufs5	Dicer1
		Tmem155	Lsm12p1	Dtx4
		Loxl3	Ccl4l2	Pcdh12
		43351	Il13ra1	Ddit3
		Cep112	Ccdc150	Fgfr4
		Mettl7b	Sdc1	Btbd6p1
		Loc730101	Pcdhgb3	Patj
		Spata6	Anln	Cd22
		Itga9	Map3k20	Phbp5
		Cenpi	Nsdhl	Shf
		Znf311	Traip	Uty
		Golga8a	Gtf3c6	Antxr2
		Tpsb2	Mlec	Ppp1r1a
		Wwtr1	Sdhaf3	Znf107
		Sv2b	Poldip2	Clnk
		Fgfr2	Nhp2	Pigl
		Ankrd13b	Rpf2	Ank1
		Wnt10b	Ran	Arhgap25
		Loxl1	Hnrnpab	Gfod1
		Fam227a	Pop7	Foxl2nb
		Chst3	Ccdc74b	Jmjd7-pla2g4b
		Ptprvp	Fance	Lfng
		Clu	Mrps17	Prdm8
		Abcc3	Eif2s1	Znf627
		Ifi27	Hdac2	Amy2b
		Slc4a11	Lyar	Upk3b
		Fut1	Hyls1	Igha1
		Lpin1	Sapcd2	Nox1
		Ca2	Tmem101	Rgs20
		Gnb3	Lman2l	Tmem167b
		Chrd	Prorp	Inpp5a
		Tmem17	Ttll12	Glipr1
		Znf618	Slc9a5	Osmr
		Brca1	Samd1	Osgin1
		Tnfrsf9	Cd70	Lysmd3
		Camsap2	Ndufaf8	Adhfe1
		Slc43a3	Tmem198	Brsk2
		Fam184a	Ltbp1	Cyp2d8p
		Ribc2	Podxl	Cacul1
		Asrgl1	Ei24	Znf75a
		Camk4	Tnf	Myom1
		Dock1	Rab38	Il9rp3
		Vash2	C12orf45	Cyth4
		Emid1	Macroh2a1	Fam117b
		Vstm4	Wnt6	Il9r
		Acy3	Srprb	Rin3
		Pla2g16	C15orf39	Tcfl5
		Gins3	Gpnmb	Trim62
		Gcat	Mxra7	Ryk
		Adam12	Slc22a31	Nsfp1
		Caskin1	Dlat	Klhdc1
		Gpr63	Tpra1	Agap7p
		Fam129b	Dcps	Eml5
		Kcnk12	Serping1	Ranbp17
		Nlgn2	Myo5b	Erfl
		Amotl1	Znf668	Rfx3
		Cish	Samd10	Nsun7
		Ddx12P	Maz	Znf331
		Gpr82	Ears2	Bach2
		Ccdc15	Oca2	Efcab13
		Elovl7	Hpf1	Paip2b
		Vldlr	Mrps16	Abcc2
		Ankrd50	Plxna1	Sim2
		Stac	Larp1b	Stim1
		Hells	Mrpl42	Cxcr5
		Fkbp10	Gins4	Syt11
		Dmc1	Fbn1	Scnn1d
		Pard6G	Pla2g12a	Tincr
		Mybl2	Mon1a	Prkcb
		Ccdc74b	Ogfod1	Trps1
		Ms4a4a	Fam171a1	Xylt1
		Cd80	Ralbp1	Pitpnm2
		Mgll	Pgrmc1	Rps21p4
		Il6	Epb41l2	Agpat5
		Serpine1	Psmg1	Ceacamp3
		Oip5	Pld4	Stk32b
		Ccr5	Cdk5	Kcnab3
		C9orf40	Cd276	Prrx1
		Gpc2	Psmg4	Hla-drb6
		Ccl17	Isoc1
		Pomgnt2	Nek2
		Cercam	Dusp5p1
		Cend1	Mycbp
		Pfkfb4	Knstrn
		Mir25	Tmem250
		Cenpk	Pinlyp
		Smo	Tlr9
		Slc4a3	Psmb8
		Kif21A	Eef1aknmt
		Pthlh	Sco2
		Mcm4	Mrps12
		Rnf144a	Cdk2ap1
		Adgra2	Selenos
		Qprt	Mkks
		Slc35g2	Zfp92
		Flnc	Lactb2
		Sdc1	Mrpl46
		Dthd1	Bdh1
		Mchr1	Nop10
		Kirrel1	Ppm1g
		Rac3	Rplp0
		Ppp2r2c	Ndufb10
		Fzd5	Ttc1
		Kctd3	Ruvbl2
		Egfl8	Exph5
		Fam92a	Slc16a9
		Stil	Apoc1
		Mst1	Adam15
		Tsnaxip1	Mettl5
		Sult1A1	Nt5dc4
		Ppm1e	Them4
		Sh2D2a	Mccc2
		Epop	Tbx10
		Racgap1	Txn2
		Kiaa0895l	Mpzl1
		Tmprss9	Sri
		Pou4f1	Flywch2
		Tp63	Mrpl4
		Ctcfl	Commd4
		Kcp	E2f3
		Tnfrsf12a	Trib3
		Creb5	Fhod1
		Meis1	Pyurf
		Atad5	Lrrc75a
		Chtf18	Pold1
		Sec14l2	Npb
		Kcnq4	Ankef1
		Prss12	Dars2
		Casc2	Xylb
		Frmd4b	Mettl26
		Frmd4a	Tbc1d16
		Slc12a8	Pcnt
		Sema4c	Uqcc3
		Lrp4	Rnf187
		Kif11	Ccrl2
		Socs2	Nlgn2
		Ctdspl	Tnfrsf11a
		Col6a2	Tlr8
		Plk4	Uqcrq
		Dnali1	Ddit4
		B4galnt3	Cinp
		Fen1	Pitx1
		Tshz2	Oxtr
		Linc00664	Fam20c
		Spdl1	Cyc1
		Ccdc78	Lilra6
		Zbtb8a	Prdx5
		Cadm4	Reep4
		Acrv1	Mpp2
		Ttbk1	Dynll1
		Itsn1	Cenpn
		Phldb1	Slc35f2
		Maf	Snapc2
		Adgrb2	Spire1
		Tsks	Ndufaf1
		Perp	Timm8a
		Cxorf57	Rcc1
		Prelid3a	Sub1
		Ercc6l	Mdh2
		Rfc3	Col24a1
		Usp32p1	Cisd3
		Mad2l1	Tie1
		Mtmr11	Nolc1
		Tcn2	Nostrin
		Ptgfrn	Cep41
		Fam69b	Hyou1
		Cux2	Rgl1
		Ggh	Cenpk
		Nedd4	Chaf1b
		Ccdc34	Stap2
		Parm1	Nubp2
		Fads1	Sec61g
		Rragd	Vps72
		Klc3	Chchd6
		Pik3r6	Sae1
		Scml2	Ccdc85b
		Trbv6-5	Noa1
		Sec31b	Crls1
		Gimap6	Echs1
		Cenpu	Spc25
		Rassf4	Actg1
		Lamb1	Ebp
		Cpne2	Igf2bp2
		Far2	Arntl2
		Knstrn	Arhgap10
		Gimap4	Tmem177
		S100a1	Ndufb2
		Tbc1d4	Mvk
		Slc45a3	Rccd1
		Npdc1	C1qbp
		Abca2	Atp5mf
		Pstpip2	Gsto1
		Stk33	Fam72a
		43348	Ado
		Nfia	Slc7a1
		Stard8	Dgkh
		Ube2T	Hapln3
		Amph	Blmh
		Rad51Ap1	Mrto4
		Cenpw	Hsf4
		Loxl1-As1	Fam210a
		Bbs5	Tprn
		Ccr2	Chchd1
		Abcb6	Serpinh1
		Snx32	Fdx2
		Mcm7	Ppp5c
		Gimap5	Cenps
		Adora3	Krt8p12
		Lrrc75b	Phax
		Kctd12	Cd320
		Matn2	Mrps18a
		E2F2	Pfdn6
		Cd3g	Hddc3
		Rgs12	Lap3
		Prss21	Tp53rk
		Neil1	Fam89b
		Rap1Gap	Fam53a
		Gzmk	Cacybp
		Sirpa	Mpg
		Tubg1	Rab40a
		Tmem163	Dhrs13
		Fam57a	Zbtb47
		Cald1	Anapc11
		Fkbp9	Nqo1
		Paics	Prelid1
		Rnf157	Icam1
		Ggt1	Fignl1
		Asf1B	C11orf95
		Gapdhs	Fkbp11
		Olfm2	Fam86c2p
		Pttg1	Thop1
		Nrcam	Coq9
		Rad51	Pccb
		Ncapg2	Mfsd3
		Zbed8	Nomo2
		Cttn	Pgam5
		Hmgb3	Hsbp1
		Loc642846	B3gnt9
		Apol4	Cchcr1
		Poc1a	Oplah
		Lrp6	Eif4ebp3
		Ltb4r2	Fstl1
		Krt8	F8a1
		Ovos2	Loxl1
		Mst1l	Akap1
		Apobec3b	Mgst1
		Trim45	Mrpl18
		Capn5	Cyp2j2
		Gimap8	Cd7
		Mst1p2	Rhebl1
		Crim1	Zdhhc9
		Wdhd1	Card9
		As3mt	Gstp1
		Scd	Fam184a
		Prc1	Nacc1
		Dna2	Acat1
		Pacsin3	Nxt1
		Tk1	C21orf58
		Dcaf12	Cdk2ap2
		Lrp8	Slc25a22
		C1r	Ccnf
		Vps9D1-as1	Nedd4l
		Dhrs9	Mtfmt
		Tnfsf4	Rfc4
		Kcnip2	Hddc2
		Ddx11	Prmt1
		Pag1	Timm50
		Dlx4	Mcrip2
		Pdss1	Clpp
		Chaf1b	Sil1
		Cltcl1	Gadd45gip1
		Ptprm	Sec16b
		Pam	Nfkbie
		Hcg22	Chchd4
		Chek1	Dnajc9
		Ust	Alas1
		Cdhr1	Hdgf
		Mcm6	Bola2b
		Rmi2	Ssx2ip
		Ghrl	Higd1a
		Tnfsf8	Stip1
		Gcnt1	Arpc5l
		Nfe2l3	Wars1
		Mindy4	Smc2
		Miat	Cln6
		Cenpo	Pnp
		Tmem198	Tcf19
		Abhd17C	Fam104b
		Cd3eap	Hibadh
		Smc4	Tsks
		Edaradd	Ankrd33b
		Podxl	Septin3
		Mgat3	Tymp
		Mgat4a	Mphosph6
		Plxnd1	Leng9
		Macrod1	Pgm2
		Ltb4r2	Slc25a43
		Rrm1	Marcks
		Lrrc37a6p	Comtd1
		Slc9a5	Zdhhc11
		Myh10	Ddias
		Gipr	Cetn2
		Adam9	Arhgef25
		Havcr2	Bex3
		Hesx1	Spata21
		Kif18a	Mrm2
		Prkar2b	Cpxm1
		Suv39h2	Bola3
		Clec9A	Arl6ip5
		Adssl1	C17orf58
		Arhgef11	Slc17a9
		Pygl	Rhou
		Wnt3	Npw
		Mtfr2	Spindoc
		Myof	Slc7a5
		Togaram2	Casp6
		Sgo1	Znhit2
		Lgmn	Rplp1
		Rad54b	Znf311
		Them5	Apobec3b
		Slc43a1	Aldoc
		Specc1	Henmt1
		Cdc7	Clba1
		Tonsl	Mars2
		Drp2	Hoxc9
		Cmtm1	Jak3
		Hspg2	Cthrc1
		Brsk1	Cbarp
		Dcbld1	Hmox2
		Haao	Thnsl1
		Ezh2	Ppat
		Trpm4	Hsd17b10
		Cenpn	Sem1
		Ndc80	Dhrs11
		Tmem200a	Ildr1
		Pjvk	Colgalt2
		Il13ra1	Atp5if1
		Mmp25-as1	Mtmr11
		Tpm2	Mrpl28
		Ppiel	Ube2v2
		Ccne2	Smim13
		Smc2	Actl10
		Fgd4	Pomp
		Asmtl-as1	Ptpa
		Eri2	Csf1
		Rhpn1	Arhgef39
		Ccne1	Ndufaf4
		Rsrp1	Pdzd11
		Shisa3	Atp5f1d
		Bmpr1a	Ngef
		Slc25a10	Xrcc2
		Luc7l3	Actb
		Chac2	Ssna1
		Golga8b	Mtln
		Slc17a9	Sphk1
		Dok3	Nlrc4
		Sapcd1	Tmem201
		Cd96	Decr2
		Il12rb2	Sh3rf1
		Colq	Txnl4a
		Loc100507564	Cluap1
		Bco2	Snrpe
		C17orf51	Ndufb11
		Atad2	Efnb1
		Parpbp	Znf512b
		Gpr19	Aicda
		Golm1	Wnt10a
		Bricd5	Fam86c1
		Pold1	Hyal2
		Pcna	Phgdh
		Baiap2-dt	Sfxn4
		Flvcr2	Slc25a39
		Znf850	Traf7
		Hsd3b7	Klhl42
		Cenpm	Glce
		Nop16	Mrpl13
		Elmo3	Snrpc
		Stmn1	Fkbp1a
		Tlr4	Adam9
		Knl1	Fzd6
		Ankle1	Grm4
		Slc19a1	Nthl1
		Paqr6	H3p6
		Kbtbd6	Sh2d2a
		Donson	Tmem25
		B9d1	Clul1
		Fgf2	Cip2a
		Pon2	Eif2s2
		Clcn5	Mrps31
		Pop1	Chtf18
		Cdca4	Hadh
		Psmc3ip	Riox2
		Yjefn3	Isg15
		Yes1	Mrpl57
		Sfmbt2	Mcur1
		Reep2	Ttf2
		Ppp2r3b	Rcor2
		Uqcc1	Tipin
		Adat2	Mcat
		Cdk2	Cst3
		Sycp2	Bmp1
		Hk2	Tomm34
		Kif22	Aunip
		Msh6	Cdk6
		Ccdc77	Ptch1
		Prr22	Bspry
		Mcoln2	Pkd2
		Lyar	Mcm8
		Rars	Cbln3
		Pole	Mzt2a
		Uap1l1	Fbxo5
		Nr2f6	Parvb
		Cybrd1	Nudt19
		Rasal1	Glrx2
		Lima1	Ccdc74a
		Afmid	Nuf2
		Mxd3	Fam98b
		Hpdl	Pdcd1
		Fancb	Spc24
		Gclm	Znf74
		Cyb561	Pnpt1
		Znf367	Mvb12b
		Net1	C1orf53
		Bmp8a	Nudcd1
		Nudt6	Acsl4
		Tst	Armc9
		Smarcd3	Spsb2
		Ckap5	Lta
		Mcm2	Znf2
		Esr2	Zmiz1
		Arhgap33	Frat2
		Gcsh	Mif
		Stk39	Haspin
		Nme1	Slc35a4
		Sass6	Tmem231
		Incenp	Rtkn
		Klhl17	Spatc1l
		Cenpp	Eps8l2
		Cpox	Ajm1
		Wrn	Tmem11
		C5orf30	Golga6l9
		Mthfd1l	Mmachc
		Reep4	Vars1
		Egr2	Dpy30
		Pi4kap1	Dll3
		Slc16a6	Fam174b
		Lmnb1	Prdm1
		Adm2	Ptpmt1
		Nup43	Net1
		Vdr	Fam174c
		Cacna1D	Prim1
		Stom	Dok7
		Loc646471	Agpat3
		Tnfaip8l2	Homer1
		Mettl3	Ulbp3
		C18orf54	Lrrc20
		Bysl	Slamf7
		Fzd7	Hsp90ab1
		Pkn3	Polr2f
		Gdpd3	Itpka
		Ints13	C14orf119
		Cks1b	Ttc38
		Plcxd1	Smco4
		Ptchd3p1	Mthfd2
		Minpp1	Selenoh
		Trnt1	Apol1
		Mtbp	Ubtd2
		Ap3m2	Pcbd1
		Isyna1	Jsrp1
		Pnma3	Znf358
		Apold1	Tlcd5
		Fam174b	Tspan17
		Il6St	Kif21a
		Slc16A1	Bcas1
		Tmem41B	Coa6
		Tmem106c	Slirp
		Blvra	Pimreg
		Acot7	Ssbp4
		Fkbpl	Pfdn2
		Eno3	Dgkz
		Chaf1a	Pigp
		Rccd1	Muc1
		Slc1a4	Zc3h12c
		Hltf	Ribc2
		Nr1h3	Oat
		Plcxd2	St3gal4
		Pcnt	Mettl1
		Ppif	Mrps28
		Trit1	Yjefn3
		Ahsa2p	Pigz
		Klhl42	Cish
		Cep152	Ppib
		Fancd2	Mcam
		Bmp1	Bsg
		Tbc1d24	Znf697
		Cdk3	Dusp23
		Lmnb2	Ing2
		Pgghg	B4gat1
		Ldha	Orc1
		Dpy19l2p2	Pdcl3
		Dpysl2	Ska2
		Wdr75	Col4a5
		Fbxo5	Sdf2l1
		Gfi1	Golga2p7
		Rtel1	Rfc3
		Cenpt	Smc1b
		Fasn	C1galt1c1
		Glyctk	Prkar1b
		Slc5a3	Pnma6b
		Pilrb	Ptgis
		Khdc4	Kpna2
		Pycr1	Dcbld1
		Ager	Efl1p1
		Knop1	Sh3pxd2a
		Dnajc3-dt	Ccr10
		Krit1	Klf13
		Etv5	Cox7b
		Cstf2	Esr2
		Slc26a6	Kif5a
		Kcnd1	Fam89a
		Exosc3	Cct4
		Tubb	Elovl7
		Gstm2	Ccl3
		Mis18a	Kif15
		Fanca	Gngt2
		Ptpn7	Trim47
		Zglp1	Glyatl2
		Npl	Sptbn2
		Slfn13	Hoxb7
		Ttf2	Commd8
		Arhgef39	Cyp51a1
		Cacnb1	Tyrobp
		Dusp7	Ptrh2
		Adm5	Orc6
		Arhgap11b	Hoxb4
		Usp49	Htatsf1p2
		Rbpj	Pla2g4a
		Nsun5p1	Fh
		Nsd2	Znf771
		Galnt6	Phrf1
		Cenpj	Gbap1
		Nsun5p2	Dok3
		Nsmf	Nectin1
		Tacc3	Slc19a1
		Keap1	Pole2
		Sh3pxd2a	Cmtm8
		H2afx	Cachd1
		Paxx	Mrpl16
		Mms22l	Chek2
		Timm8a	Mamdc4
		Ssx2Ip	Rad54l
		Msh5	Mrpl17
		Tcf19	Hilpda
		Slc31a1	Elob
		C4Orf46	Txndc17
		Csad	Hsd11b2
		Tgds	Atp8a2
		Sfxn1	Cox5b
		Taf1c	Morn4
		Cse1l	Bloc1s5-txndc5
		Hspd1	Thoc3
		Erlin1	Birc7
		Ccdc14	Hoxc4
		Znf692	Spcs2p4
		Scamp5	Sms
		Ss18l1	Mmab
		Ppat	Abracl
		Mat2A	Wdr18
		Hnrnpab	Pcsk1n
		Tpi1	Meis2
		Nbeal2	Dtx3l
		Ctsb	Slc9a3r2
		Slc25a13	Cyb561
		Cep57l1	Pusl1
		Coa6	Fkbp10
		Mettl1	Dpp3
		Igip	Ywhae
		Tubb4b	C4orf48
		Nup35	Fcer1g
		Txk	Polr2e
		Ncapd3	Hprt1
		Hmga1	Atp1b1
		Ube2s	Bivm
		Mafg	Cd300a
		Mrps25	C4b
		Snord80	Il4i1
		Bace1	Ntng1
		Ptcd3	Nrip1
		Sptbn2	Znf823
		Ppt2	Tekt4p2
		Mtfp1	Gucy1a1
		C1orf112	Fam131c
		Umps	Ntpcr
		Ttc38	Golga7
		Sugp2	Ccdc113
		Dpy19l1	Fhl3
		Ywhag	Tmem141
		Plod1	C12orf75
		C7orf50	Mis18a
		Rrp1	Aldh4a1
		Blmh	Gzmb
		Tkt	Lrp5
		Gnl3	Nop16
		Nabp1	Gatd1
		Larp4	Fam96ap2
		Timm21	Med12l
		Nup107	Hmgb2
		Nfkb2	Dtd2
		Ppme1	Gpn3
		Mthfd2	Myrf
		Ssh3	Mtfr2
		Pex1	Bpnt1
		Grpel2	Bst2
		Vps13a	Kbtbd7
		Thoc1	Bcat1
		Znf789	Ndufb6
		S100a13	Speg
		Psmg3	Rps27l
		Slc38a5	Nr1h3
		Mterf1	Cadm1
		Trmt2a	Ndufs8
		Apip	C4orf46
		Slc1a5	Ntng2
		Rhbdd3	Rgs12
		Polr2h	Irf5
		Tuba1c	Ttll7
		Xxylt1	Rcan1
		Nktr	Hla-dpb2
		Nsun6	Dnaja4
		Pnn	Mrps24
		Tubg2	Sema4c
		Etnk1	Smim4
		Saal1	Cracd
		Tmem201	Piezo1
		Nars	Evi2a
		Nemp1	Il27ra
		Atat1	Rad51c
		Slf1	Mpp1
		Cyp51a1	C9orf116
		Ccdc18	Lrcol1
		Ckap2	Plk4
		Srsf1	Dhcr24
		Heg1	Znrf3
		Nup85	Ighg4
		Rcc2	Or2a1
		Bora	C1qb
		Ccdc43	C8orf88
		Ankrd54	Gpr55
		Gdf11	Slc25a19
		Marcks	Tlr10
		Tpp2	Plekhg4
		Ndc1	Sec61b
		H2afz	Slc39a7
		Ywhae	Pdia2
		Polr1c	Adm2
		Gk	Cluh
		B4galt2	Itgb5
		Fam98a	Chst12
		Rfc4	Ndufc2-kctd14
		Rbm28	Rdm1
		Pnp	Rab34
		Plcb3	Tm6sf1
		Vdac1	Arvcf
		Tmem259	Mast1
		P2ry11	Hcfc1r1
		Eno1	Golga2p10
		Ndufaf7	Cxcl10
		Asns	Tnfsf8
		Hsf2	Il17d
		Rint1	Ifit3
		Srsf2	Slc44a1
		Gapdh	Ska1
		Pkm	Gale
		Fbxl6	Morn2
		Trap1	Dnah14
		Casp3	Tp63
		Cd151	Plek2
		Mrpl27	Fam169a
		Ddx56	Mark2p16
		Cdk10	Il1rap
		Mrpl32	Ighv5-78
		Flcn	Gnb3
			Mrpl58
			Fam86jp
			Klf16
			Rpl3p4
			Uchl3
			Kcnk9
			Gjd3
			Slc45a3
			Ndufb7
			Samhd1
			Lyl1
			Pars2
			Rfc2
			Wdr46
			Prps2
			Serhl2
			Slc39a8
			Plpp4
			Arsk
			Rida
			Scn11a
			Znf625
			Tubb4b
			Chrnb1
			Rhov
			Mtco2p12
			Trim46

## Sheet: S3H
Suppl Table S3H GSEA of RS gene signatures in IKK2caca TCL1 lymphomas vs TCL1
positive NES = enriched in first genotype
IKK2caca TCL1 vs TCL1
pathway	pval	padj	log2err	ES	NES	size	leadingEdge
RS_UP_TENHACKEN	4.44991e-07	4.44991e-07	0.674963	0.495869	2.14072	86	Nedd4;Spdl1;Sgo1;Mcm4;Gnl3;Brip1;Eme1;Dscc1;Rad51;Bora;Oip5;Kif2c;Melk;Orc6;Pole;Haspin;Stil;Spc24;Nup85;Brca1;Cdca2;Pcna;Bub1;Aurkb;Kif18a;Cdc6;Rad51ap1;Rtel1;Ccdc18;Rexo5;Ska1;Fancd2;Pclaf;Recql4;Exo1;Tpx2;Cdk1;Chek1;Mcm10;Wdhd1;Ckap2l;Mcm7;Ccna2;Gcsh;Cenpi;Mcm6;Mns1
RS_DOWN_TENHACKEN	0.000244679	0.000244679	0.498493	-0.52559	-1.93069	54	Itgb7;Rin3;Ahnak;Lgals1;Cbx7;Tent5a;Sfxn3;Add1;Arhgef18;S1pr4;Rasgrp2;Mylip;Map3k14;Klf13
RS_UP_HUMAN_TENHACKEN	0.000331197	0.000331197	0.498493	0.247752	1.37308	573	Nav2;Smc4;Nedd4;Il4i1;Egr2;Fam92a;Ifi27;Spdl1;Myof;Pygl;Wnt10b;Smco4;Cdca5;Gmnn;Sdc4;Grpel2;Cenpf;Tk1;Sgo1;Nfkb2;Tmem17;Mcm4;Nbl1;Rdm1;Pacsin1;Gnl3;Haao;Brip1;Eme1;Mxd3;Tyms;Cenpn;Mrpl32;Dscc1;Trmt2a;Rad51;Dlgap5;Plk4;Fras1;Nup43;Bora;Hdgfl3;Nusap1;Cxcl10;Gimap6;Umps;Kif20a;Csf1;Slc25a13;Net1;Gimap5;Lpin1;Rcn1;Oip5;Colq;Tnfsf8;Tubg1;Kif23;Spc25;Melk;Adam9;Orc6;Ccdc77;Pole;Rad54b;Haspin;Knl1;Ncaph…
RS_UP_NADEU	0.0185177	0.0185177	0.352488	0.204694	1.1774	963	Lta;Il4i1;Marcksl1;Casp6;G3bp1;Fam92a;Prdx5;Sri;Tnf;Vps72;Nfkbie;Uchl3;Selenoh;Bid;Ubtd2;Smco4;Cdca5;Ndufaf8;Gmnn;Cenpx;Psme2;Cenpf;Cisd1;Tk1;Mrps2;Hpf1;Snrpd1;Dcps;Ung;Mcm4;Thoc7;Nbl1;Rdm1;Sh3rf1;Coq9;Uqcr10;Eme1;Mrps6;Tyms;Cenpn;Nudt19;Il27ra;Fignl1;Hirip3;Apex1;Mgst1;Pgam5;Dscc1;Rsl1d1;Jak3;Cenps;Rad51;Dlgap5;Slc25a19;Plk4;Tomm34;Fam53a;Dst;Ndufb11;Psmg1;Gngt2;Mrps16;Cchcr1;Banf1;Ska2;Nusap1;A…
RS_DOWN_NADEU	0.00160081	0.00320163	0.45506	-0.291161	-1.41956	419	Mtss1;Cdc25b;Rin3;Ndrg1;Sbk1;Ralgps2;Cbx7;Arhgap20;Slc48a1;Ypel2;Tcp11l2;Fcgr2b;Cyth4;Fbxo3;Ypel3;Serinc5;Endou;Dgkd;Man2a1;Cd22;Arhgef18;Prkce;Pygm;Atp2b1;Alox5ap;Xkrx;Ep300;Mef2c;Mbnl2;Ybx3;S1pr1;Ssh2;Plcl2;Rasgrp2;Ckap4;Lmbrd1;Rapgef3;Chit1;Ets1;Tle4;Abca7;Aplp2;Adam19;Eif2ak3;Add3;Edem1;Tmem71;Kcnn4;Tnrc6b;Ehd3;Prex1;Pip4p1;Fmo5;Fgd3;Usp15;Tapt1;Prdm4;Sptbn1;Gfod1;Lrwd1;Acacb;Eif1b;Mier1;Slc4…
RS_UP_KLINTMAN	0.0214384	0.0214384	0.352488	0.311864	1.4074	110	Egr2;Stat1;Nfkbie;Pold4;Mcm4;Brip1;Polb;Gtf2h3;Rad51;Mlh1;Mnat1;Rps27a;Mapk8;Polr2d;Xrcc4;Ezh2;Il10;Map3k8;Map2k1;Rfc3;Brca1;Xpo1;E2f1;Pcna;Ube2t;Ptpn11;Pkmyt1;Cdc6;Usp39
RS_UP_PARRY	3.27420614417261e-07	1.30968245766904e-06	0.674963	0.402305	1.97899	177	Smc4;Spdl1;Cdca5;Gmnn;Cenpf;Tk1;Mcm4;Nbl1;Brip1;Eme1;Tyms;Dscc1;Dlgap5;Plk4;Nusap1;Kif20a;Lpin1;Rcn1;Kif2c;Kif23;Melk;Orc6;Pole;Haspin;Ncaph;Nsd2;Stil;Ezh2;Shcbp1;Neil3;Gins2;Top2a;Rfc3;Kif18b;Cdca7;Brca1;Esco2;E2f1;Cdca2;Kif22;Aurka;Slc43a3;Gins3;Kif11;Spag5;Bub1;Cenpe;Birc5;Aurkb;Kif18a;Cdc6;Rrm1;Cdca8;Rad51ap1;Dtl;Cep55;Rexo5;Rars;Zwint;Ccnb2;Hmmr;Ska1;Plk1;Prc1;Kif15;Tm6sf1;Recql4;Exo1;Tpx2;C…

## Sheet: S3I
Suppl Table S3I GSEA of CLL gene signatures in IKK2caca TCL1 lymphomas vs TCL1
positive NES = enriched in first genotype
IKK2caca TCL1 vs TCL1
pathway	pval	padj	log2err	ES	NES	size	leadingEdge
C2_UP	0.00120146	0.00200244	0.45506	0.396376	1.71057	71	EGR2;TNF;BHLHE40;EIF4A3;CD83;IFRD1;KDM6B;ID3;TP53INP2;CD69;DUSP2;BCAS2;NAMPT;PPP1R15A;PER1;DUSP1;YPEL5;NFKBID;TIPARP;SLC2A3;PI4K2A;KLF6;IER5;STK17B;TOB1;NR4A1;DUSP4;KLF10;DUSP10
HERISHANU_E2F	0.0096361	0.0096361	0.38073	0.700067	1.79005	10	IL4I1;GMNN;MCM4;EZH2;CDCA7;PCNA;CDC6
HERISHANU_LN_general	4.51392034051224e-06	2.25696017025612e-05	0.610527	0.619049	2.26111	36	EGR2;CR2;CD83;TK1;MCM4;CCNL1;TYMS;CD69;DUSP2;TOP2A;CDCA2;AURKA;BUB1;CENPE;BIRC5;AURKB;CDC6;DUSP1;CCL4;CCNB2
HERISHANU_NFKB	0.00243415	0.00304269	0.431708	0.659122	1.86051	14	LTA;TNF;NFKBIE;CD83;CXCL10;DUSP2
CLL-PD_MYCTARGETS	0.000440306	0.00110077	0.498493	0.425276	1.83746	74	G3BP1;MCM4;GNL3;APEX1;RSL1D1;HNRNPC;CCT4;NCBP2;HNRNPA2B1;CCT3;PSMC4;PHB;PTGES3;CDC45;CCT7;NPM1;NME1;EIF2S1;DUT;CANX;VDAC1;DEK;PSMA7;NHP2;CCT2;EXOSC7;COX5A;COPS5;PSMB2;CCNA2;HNRNPU
