# Supplementary material for: Strong constitutive NF-κB signaling in B cells drives SLL/CLL-like lymphomagenesis and overcomes microenvironmental dependencies
Source: Leukemia. 2026 Jan 16;40(3):522–39. doi: 10.1038/s41375-025-02844-8 (PMC12960208; doi:10.1038/s41375-025-02844-8)
Supplement: Supplementary file 6 — Supplemental Table 4 DEG young mice [file 41375_2025_2844_MOESM6_ESM.xlsx]

## Sheet: S4A
Table S4A Differentially expressed genes in peritoneal B1a cells of CD19Cre IKK2ca mice compared to CD19Cre control mice
Genes upregulated in peritoneal cavity of CD19Cre IKK2ca compared to CD19Cre
Gene	baseMean	log2FoldChange	lfcSE	stat	pvalue	padj	UniqueGeneName	diffexpressed
Cfp	214.099	1.2097	0.172694	7.00487	2.47222e-12	8.85547e-09	Cfp	UP
Mndal	65.8386	1.14102	0.200703	5.68509	1.30747e-08	2.34168e-05	Mndal	UP
Nfkbia	322.897	0.593158	0.120819	4.90947	9.13211e-07	0.00081778	Nfkbia	UP
St3gal6	59.4494	1.11666	0.230502	4.84446	1.26955e-06	0.000909504	St3gal6	UP
Serpina3g	161.847	0.981641	0.207943	4.72072	2.35015e-06	0.00140304	Serpina3g	UP
Tmsb10	226.646	0.651118	0.140487	4.63473	3.57398e-06	0.00178133	Tmsb10	UP
Themis2	39.3388	1.08869	0.272798	3.99081	6.58473e-05	0.0119376	Themis2	UP
Acot7	25.3858	1.25826	0.319041	3.94389	8.01718e-05	0.013675	Acot7	UP
Dbi	103.012	0.668674	0.17316	3.86159	0.000112653	0.0161409	Dbi	UP
Lmo7	29.491	1.05644	0.280816	3.76203	0.000168541	0.0206569	Lmo7	UP
Cd55	124.066	0.69446	0.184819	3.75751	0.000171611	0.0206569	Cd55	UP
Trp53	100.925	0.622163	0.165668	3.75549	0.000173006	0.0206569	Trp53	UP
Ccnd2	399.794	1.22897	0.33718	3.64487	0.000267532	0.0290461	Ccnd2	UP
Limd2	270.861	0.5859	0.162312	3.60973	0.00030652	0.0313701	Limd2	UP
Snrpg	90.3219	0.581645	0.164923	3.52677	0.000420657	0.0386358	Snrpg	UP
Trim34a	73.5829	0.708573	0.205956	3.44042	0.000580821	0.0462334	Trim34a	UP
Tuba1b	180.843	0.627659	0.184154	3.40834	0.000653603	0.0498129	Tuba1b	UP
Genes downregulated in peritoneal cavity of CD19Cre IKK2ca compared to CD19Cre
Gene	baseMean	log2FoldChange	lfcSE	stat	pvalue	padj	UniqueGeneName	diffexpressed
Psap	270.857	-0.648023	0.130891	-4.95085	7.39e-07	0.00081778	Psap	DOWN
Rcn3	68.0222	-1.28767	0.279169	-4.61251	3.98e-06	0.00178133	Rcn3	DOWN
Rin3	81.7765	-0.797791	0.183923	-4.33763	1.44e-05	0.00449205	Rin3	DOWN
Gadd45g	25.5598	-3.98046	0.926261	-4.29734	1.73e-05	0.00476302	Gadd45g	DOWN
Sbk1	44.7786	-0.97757	0.23268	-4.20134	2.65e-05	0.00678876	Sbk1	DOWN
Fcrla	296.782	-0.613109	0.147802	-4.14817	3.35e-05	0.00800306	Fcrla	DOWN
Gm45552	41.3732	-1.12641	0.27785	-4.05401	5.03e-05	0.0106084	Gm45552	DOWN
Fcgr2b	81.9561	-1.05767	0.270478	-3.91037	9.22e-05	0.0150047	Fcgr2b	DOWN
Hepacam2	106.843	-0.847805	0.220649	-3.84232	0.00012188	0.016169	Hepacam2	DOWN
Pou2f2	97.6996	-0.655636	0.184289	-3.55766	0.00037417	0.0362241	Pou2f2	DOWN
Rap1gap	53.4301	-0.800834	0.229808	-3.48479	0.00049252	0.0420051	Rap1gap	DOWN
Pim2	95.4936	-0.63613	0.183169	-3.47291	0.00051485	0.0428883	Pim2	DOWN

## Sheet: S4B
Table S4B Differentially expressed genes in peritoneal B1a cells of CD19Cre IKK2ca/ca mice compared to CD19Cre control mice
Genes upregulated in B1a cells in peritoneal cavity of CD19Cre IKK2caca compared to CD19Cre mice (FC >1.5, padj <0.05)
Gene	baseMean	log2FoldChange	lfcSE	stat	pvalue	padj	UniqueGeneName	diffexpressed
Nfkbia	376.365	1.39848	0.110105	12.7014	5.80851e-37	4.70431e-33	Nfkbia	UP
Cfp	267.909	2.04124	0.19181	10.642	1.89962e-26	5.12833e-23	Cfp	UP
Ms4a4c	27.5796	3.27095	0.338914	9.65126	4.85534e-22	9.83085e-19	Ms4a4c	UP
Cd52	1294.87	1.05147	0.109862	9.57079	1.06094e-21	1.71852e-18	Cd52	UP
Il4i1	42.6267	2.27271	0.24001	9.46921	2.81958e-21	3.80596e-18	Il4i1	UP
Pfn1	1193.51	0.858294	0.0937445	9.15568	5.40189e-20	6.24998e-17	Pfn1	UP
B2m	2673.47	0.850682	0.0938856	9.06083	1.29463e-19	1.31065e-16	B2m	UP
St3gal6	68.3268	1.76813	0.199847	8.84739	8.95875e-19	8.06188e-16	St3gal6	UP
Lta	22.4863	3.11732	0.35336	8.82193	1.12503e-18	9.11161e-16	Lta	UP
Grap	264.42	1.22072	0.141407	8.6327	5.99186e-18	3.78089e-15	Grap	UP
Cyba	753.677	0.968618	0.112222	8.63124	6.06884e-18	3.78089e-15	Cyba	UP
Psme2	244.926	1.06283	0.124635	8.52759	1.49422e-17	8.64406e-15	Psme2	UP
Serp1	659.684	0.796519	0.0968957	8.22037	2.02876e-16	1.02693e-13	Serp1	UP
Dusp6	13.0692	3.97553	0.491847	8.08285	6.32716e-16	3.01434e-13	Dusp6	UP
H2-Q7	129.487	1.45505	0.183809	7.9161	2.45071e-15	1.10268e-12	H2-Q7	UP
Limd2	275.837	1.03723	0.13551	7.65427	1.94407e-14	7.8725e-12	Limd2	UP
Lcp1	276.761	0.897182	0.117505	7.63527	2.2534e-14	8.69063e-12	Lcp1	UP
Batf3	13.6638	3.17333	0.447407	7.09271	1.31507e-12	4.09644e-10	Batf3	UP
Tmem134	271.312	0.84653	0.11963	7.07621	1.4815e-12	4.44396e-10	Tmem134	UP
Dbi	104.554	1.09126	0.158991	6.86364	6.71259e-12	1.94162e-09	Dbi	UP
Mndal	65.8617	1.46737	0.219698	6.67904	2.40516e-11	6.71704e-09	Mndal	UP
Ms4a6b	22.4458	2.04045	0.308865	6.60627	3.94134e-11	1.06403e-08	Ms4a6b	UP
1810073O08Rik	14.5801	2.63333	0.405547	6.49329	8.39798e-11	2.19404e-08	1810073O08Rik	UP
AW112010	109.545	1.06525	0.167855	6.34624	2.20639e-10	5.58423e-08	AW112010	UP
Plbd1	101.258	1.15363	0.183584	6.28392	3.30148e-10	7.86433e-08	Plbd1	UP
Gimap4	398.921	0.619258	0.0988108	6.26711	3.67821e-10	8.51139e-08	Gimap4	UP
Ly6d	757.289	0.991631	0.158755	6.24629	4.20328e-10	9.20064e-08	Ly6d	UP
Tes	45.1611	1.38881	0.223231	6.2214	4.92724e-10	1.05015e-07	Tes	UP
Tmsb10	211.87	0.827644	0.13585	6.09235	1.11265e-09	2.19789e-07	Tmsb10	UP
Sh3bgrl3	1072.68	0.60099	0.0990042	6.07035	1.27634e-09	2.44102e-07	Sh3bgrl3	UP
Gas5	488.814	0.685662	0.113378	6.04756	1.47052e-09	2.70676e-07	Gas5	UP
Cd300ld	11.441	3.18258	0.526675	6.04278	1.51484e-09	2.72638e-07	Cd300ld	UP
Stk17b	56.067	1.28146	0.214661	5.96967	2.37734e-09	4.09661e-07	Stk17b	UP
Gmfg	200.837	0.853415	0.144774	5.89481	3.75121e-09	6.31152e-07	Gmfg	UP
Fcer2a	18.5213	2.18695	0.371181	5.89187	3.81855e-09	6.31152e-07	Fcer2a	UP
Anxa5	151.449	0.832632	0.141524	5.88334	4.02062e-09	6.51261e-07	Anxa5	UP
Bfsp2	46.3005	1.28653	0.21956	5.85956	4.64104e-09	7.37016e-07	Bfsp2	UP
Rdh12	136.523	1.16609	0.199426	5.8472	4.9991e-09	7.7861e-07	Rdh12	UP
Mgmt	36.5082	1.41108	0.241732	5.83737	5.30304e-09	7.95452e-07	Mgmt	UP
1700016L21Rik	6.75127	4.37551	0.749571	5.83735	5.30367e-09	7.95452e-07	1700016L21Rik	UP
Rilpl2	127.046	0.889872	0.154249	5.76906	7.97143e-09	1.17383e-06	Rilpl2	UP
Psmb8	575.494	0.608918	0.106285	5.7291	1.00966e-08	1.46023e-06	Psmb8	UP
Rps19	1932.11	0.629678	0.110669	5.68976	1.27221e-08	1.80765e-06	Rps19	UP
Ptpn6	375.707	0.60865	0.1077	5.65133	1.59212e-08	2.08673e-06	Ptpn6	UP
Ms4a6c	172.584	1.81026	0.322897	5.6063	2.06702e-08	2.65727e-06	Ms4a6c	UP
Ifi211	6.60335	4.02292	0.722752	5.56611	2.60482e-08	3.24561e-06	Ifi211	UP
Cd40	62.128	1.26837	0.229857	5.5181	3.42689e-08	4.20521e-06	Cd40	UP
Relb	49.1986	1.19937	0.218966	5.47745	4.31489e-08	5.21587e-06	Relb	UP
Tnf	9.10474	3.00378	0.548926	5.47211	4.44704e-08	5.2236e-06	Tnf	UP
Psmb10	173.018	0.720209	0.132452	5.4375	5.40326e-08	6.16352e-06	Psmb10	UP
Themis2	41.0464	1.5231	0.281363	5.41328	6.18814e-08	6.9608e-06	Themis2	UP
Myo1f	7.50896	3.06854	0.573765	5.34807	8.88978e-08	9.7295e-06	Myo1f	UP
Cd82	57.8192	1.18883	0.222754	5.33694	9.45258e-08	1.0113e-05	Cd82	UP
Tuba1a	132.738	0.916571	0.171764	5.33623	9.48993e-08	1.0113e-05	Tuba1a	UP
Fam43a	41.3781	1.19938	0.226046	5.3059	1.12117e-07	1.17927e-05	Fam43a	UP
Tnfaip3	17.0385	1.8557	0.350237	5.29841	1.16815e-07	1.21293e-05	Tnfaip3	UP
Traf1	57.004	1.04674	0.202096	5.17943	2.22561e-07	2.25315e-05	Traf1	UP
Med11	68.5541	1.07197	0.207196	5.17369	2.2952e-07	2.29492e-05	Med11	UP
Tank	59.7291	0.985961	0.190657	5.17137	2.32383e-07	2.2952e-05	Tank	UP
Gm15848	22.5659	1.68615	0.328192	5.13768	2.78156e-07	2.7142e-05	Gm15848	UP
Ltb	309.997	1.66248	0.324037	5.13052	2.88942e-07	2.7531e-05	Ltb	UP
Sem1	258.71	0.596843	0.116408	5.12718	2.94107e-07	2.76974e-05	Sem1	UP
Sting1	63.4652	0.992686	0.194331	5.10823	3.25186e-07	3.02722e-05	Sting1	UP
Emp3	479.131	1.33733	0.263089	5.08318	3.71161e-07	3.41595e-05	Emp3	UP
Cks1b	17.6201	1.84929	0.366301	5.04854	4.4519e-07	4.05123e-05	Cks1b	UP
Nme1	296.922	0.651228	0.130699	4.98264	6.27241e-07	5.64447e-05	Nme1	UP
Atp5j	222.04	0.666647	0.134807	4.94519	7.60714e-07	6.62476e-05	Atp5j	UP
Slamf9	40.213	1.45934	0.295361	4.94087	7.77744e-07	6.70101e-05	Slamf9	UP
Pkp3	111.408	0.761649	0.154245	4.93793	7.89578e-07	6.73136e-05	Pkp3	UP
1810046K07Rik	239.661	0.762535	0.154515	4.93501	8.01467e-07	6.76154e-05	1810046K07Rik	UP
Serpina3g	138.76	0.890458	0.180626	4.92985	8.2293e-07	6.80093e-05	Serpina3g	UP
Iglc2	1423.65	0.652408	0.13255	4.92199	8.56673e-07	6.9382e-05	Iglc2	UP
Vcl	9.77626	2.53782	0.51693	4.9094	9.13536e-07	7.25366e-05	Vcl	UP
Nedd4	14.5677	1.98488	0.405948	4.88949	1.01097e-06	7.94934e-05	Nedd4	UP
Ifi27	127.78	0.818715	0.167572	4.88574	1.03039e-06	8.02418e-05	Ifi27	UP
Cd55	116.907	0.904604	0.187165	4.83318	1.34369e-06	0.000102665	Cd55	UP
H2-T22	77.7142	0.863956	0.179151	4.82249	1.41774e-06	0.000106317	H2-T22	UP
Cd83	209.999	0.789155	0.164331	4.80222	1.56919e-06	0.000114494	Cd83	UP
Tap1	90.7833	0.809173	0.168983	4.78849	1.68044e-06	0.000120441	Tap1	UP
Serpinb6b	9.15052	2.42575	0.506987	4.78463	1.71299e-06	0.000121324	Serpinb6b	UP
Uqcr10	152.057	0.695618	0.145425	4.78333	1.72414e-06	0.000121324	Uqcr10	UP
Fxyd6	10.5217	2.4653	0.519784	4.74293	2.10653e-06	0.000143368	Fxyd6	UP
Banf1	198.833	0.598826	0.126615	4.72951	2.25065e-06	0.000150645	Banf1	UP
Cd86	28.7022	1.24315	0.262969	4.72736	2.27456e-06	0.000150997	Cd86	UP
Smco4	9.42924	2.49457	0.528601	4.7192	2.36779e-06	0.000155908	Smco4	UP
Scd1	80.0025	1.04292	0.221339	4.71189	2.4543e-06	0.000160301	Scd1	UP
Ndufb8	160.075	0.626205	0.133808	4.67989	2.87036e-06	0.000185976	Ndufb8	UP
Sell	155.21	0.664439	0.142784	4.65347	3.26392e-06	0.000209798	Sell	UP
Hmgn3	75.4389	0.881963	0.190292	4.63478	3.57317e-06	0.000227867	Hmgn3	UP
Tnip1	35.878	1.0972	0.238459	4.60122	4.20023e-06	0.000265763	Tnip1	UP
Syngr2	98.9693	0.74854	0.16339	4.58131	4.62075e-06	0.000290104	Syngr2	UP
Rpl35	152.621	0.708594	0.15778	4.49102	7.08836e-06	0.000431644	Rpl35	UP
Lhpp	33.1658	1.10967	0.250037	4.438	9.07971e-06	0.000532874	Lhpp	UP
Pex16	29.4433	1.15742	0.261514	4.42584	9.6067e-06	0.000559206	Pex16	UP
Cstb	97.8009	0.735795	0.166956	4.40711	1.04761e-05	0.000589206	Cstb	UP
Psme2b	59.7534	0.947312	0.215208	4.40183	1.07339e-05	0.00059544	Psme2b	UP
Tmem256	73.503	0.797374	0.181587	4.39114	1.12758e-05	0.000617047	Tmem256	UP
Blvrb	52.5288	0.900739	0.206019	4.37211	1.23049e-05	0.000664385	Blvrb	UP
Wdfy1	97.5559	0.752249	0.173347	4.33956	1.42765e-05	0.000760695	Wdfy1	UP
Ndufa13	291.68	0.581309	0.134699	4.31562	1.59156e-05	0.000831616	Ndufa13	UP
Birc5	11.9656	2.05406	0.476359	4.31201	1.61779e-05	0.0008399	Birc5	UP
Rps27l	120.853	0.644495	0.150132	4.29285	1.76396e-05	0.000909955	Rps27l	UP
Ndufb7	162.857	0.612109	0.142859	4.28471	1.8298e-05	0.000932045	Ndufb7	UP
Mrpl54	73.9479	0.75299	0.175844	4.28216	1.85089e-05	0.000936896	Mrpl54	UP
Bhlhe40	9.12287	2.50496	0.588831	4.25413	2.09866e-05	0.0010364	Bhlhe40	UP
Uqcc2	70.4983	0.771468	0.181845	4.24245	2.21091e-05	0.00107868	Uqcc2	UP
Lrmp	83.3038	0.730792	0.173455	4.21314	2.51843e-05	0.00122136	Lrmp	UP
Degs1	76.8134	0.746264	0.177188	4.21172	2.53434e-05	0.00122176	Degs1	UP
Ackr2	18.8341	1.49659	0.358341	4.17643	2.96121e-05	0.00138629	Ackr2	UP
Mrps14	107.574	0.616479	0.148073	4.16336	3.13598e-05	0.00145967	Mrps14	UP
Anapc13	80.3647	0.723648	0.174255	4.15281	3.28414e-05	0.00150273	Anapc13	UP
Uqcrq	139.803	0.580532	0.139966	4.14765	3.35899e-05	0.00152834	Uqcrq	UP
Ran	111.368	0.616466	0.148986	4.13774	3.50745e-05	0.00157816	Ran	UP
Cenpw	8.28326	2.05064	0.496211	4.1326	3.58687e-05	0.00160413	Cenpw	UP
Swap70	178.422	0.594213	0.143827	4.13145	3.60479e-05	0.00160413	Swap70	UP
1700048O20Rik	14.4792	1.55887	0.37915	4.11149	3.9311e-05	0.00171172	1700048O20Rik	UP
Gtf2h5	85.4449	0.653921	0.159566	4.09812	4.16511e-05	0.00178483	Gtf2h5	UP
Mrpl14	73.6455	0.706905	0.17491	4.04153	5.31026e-05	0.00220789	Mrpl14	UP
Cdkn1a	4.95935	2.98925	0.739679	4.04128	5.31594e-05	0.00220789	Cdkn1a	UP
Mif	114.815	0.64184	0.159024	4.03613	5.43399e-05	0.0022454	Mif	UP
Ube2c	11.3247	2.51116	0.623982	4.0244	5.71196e-05	0.00232468	Ube2c	UP
Cnr2	8.05644	2.07074	0.515584	4.01629	5.91206e-05	0.00239409	Cnr2	UP
Gga2	34.8365	1.11569	0.279341	3.99402	6.49624e-05	0.00257907	Gga2	UP
Gpr34	6.39165	2.45818	0.616212	3.98918	6.63023e-05	0.00261758	Gpr34	UP
H2ax	53.4211	0.89148	0.225984	3.94487	7.98427e-05	0.00305022	H2ax	UP
Lsm2	43.7393	0.864057	0.222514	3.88317	0.000103105	0.00384338	Lsm2	UP
Zbp1	37.3177	0.944788	0.243386	3.88185	0.000103666	0.00384338	Zbp1	UP
Lamtor1	60.6712	0.756441	0.195263	3.87395	0.000107085	0.00394219	Lamtor1	UP
Sarnp	90.8394	0.637025	0.16469	3.86802	0.000109723	0.0040029	Sarnp	UP
Lyst	14.1096	1.64343	0.428884	3.83188	0.000127167	0.00440867	Lyst	UP
Nadk	73.9181	0.673627	0.176074	3.82582	0.000130335	0.00447282	Nadk	UP
Nfkbib	51.9489	0.789135	0.20643	3.82277	0.000131958	0.00450941	Nfkbib	UP
Bcl9l	7.97093	2.0541	0.537606	3.82083	0.000133005	0.00452609	Bcl9l	UP
Igkv10-96	17.6491	1.44159	0.377696	3.8168	0.000135194	0.00458131	Igkv10-96	UP
Czib	31.6697	0.961419	0.252012	3.81498	0.000136196	0.00459606	Czib	UP
Slc2a6	12.3579	1.6897	0.445074	3.79645	0.000146783	0.00487771	Slc2a6	UP
Ahcyl2	16.1225	1.42318	0.376868	3.77633	0.000159159	0.00519768	Ahcyl2	UP
Etfb	72.1094	0.697326	0.18489	3.77157	0.000162222	0.00525536	Etfb	UP
Tbcb	84.8473	0.641608	0.171232	3.74701	0.000178952	0.00572857	Tbcb	UP
Nenf	42.7535	0.880366	0.235029	3.74578	0.000179836	0.00573421	Nenf	UP
Rrm2	11.2584	1.82337	0.493127	3.69757	0.000217675	0.00672881	Rrm2	UP
Mcm3	21.4452	1.19576	0.326127	3.66656	0.000245834	0.00745697	Mcm3	UP
Gm11690	13.8361	1.42209	0.388097	3.66425	0.00024806	0.00749641	Gm11690	UP
H2-Q6	109.857	0.618646	0.169067	3.65917	0.000253032	0.00761825	H2-Q6	UP
Ccdc124	82.0538	0.654113	0.178938	3.65553	0.000256648	0.0076985	Ccdc124	UP
Hvcn1	148.682	0.804704	0.220697	3.64619	0.000266157	0.00780436	Hvcn1	UP
Mrpl17	80.4674	0.632304	0.173859	3.63688	0.000275966	0.0079539	Mrpl17	UP
Ndufc1	76.7234	0.682345	0.188451	3.62081	0.000293687	0.00834586	Ndufc1	UP
Il21r	15.6377	1.30936	0.363738	3.59973	0.000318552	0.00895816	Il21r	UP
Ttn	6.00959	2.28199	0.634827	3.59467	0.000324805	0.00903984	Ttn	UP
Gmfg-ps	35.1197	1.12739	0.317073	3.55561	0.000377106	0.0101468	Gmfg-ps	UP
Tnfaip8	82.3242	0.628624	0.178048	3.53065	0.00041454	0.0109718	Tnfaip8	UP
Mrpl35	42.9919	0.766136	0.217513	3.52225	0.000427896	0.0112884	Mrpl35	UP
Bola3	53.7275	0.722223	0.20519	3.51978	0.0004319	0.0113202	Bola3	UP
Lst1	6.41416	2.00136	0.569544	3.51397	0.000441459	0.0115335	Lst1	UP
Ndufb6	60.9868	0.71969	0.205369	3.50438	0.000457678	0.0118426	Ndufb6	UP
Stat1	50.078	0.880154	0.251737	3.49633	0.000471702	0.012128	Stat1	UP
Hcst	36.7928	0.883467	0.254268	3.47455	0.000511707	0.0129169	Hcst	UP
Top2a	9.08443	1.70553	0.490999	3.47359	0.000513551	0.0129169	Top2a	UP
Mcm5	18.0568	1.22408	0.35292	3.46843	0.000523509	0.0130625	Mcm5	UP
Rp2	35.4372	0.830099	0.23941	3.46726	0.000525789	0.0130625	Rp2	UP
Kif22	5.03778	2.38876	0.689935	3.4623	0.000535586	0.0132652	Kif22	UP
Selenoh	56.1245	0.768021	0.222958	3.44468	0.000571728	0.0139471	Selenoh	UP
Commd1	59.8311	0.699134	0.204028	3.42665	0.000611078	0.0147295	Commd1	UP
Ccdc12	87.9215	0.59023	0.172826	3.41517	0.000637414	0.015211	Ccdc12	UP
Acot7	21.955	1.20058	0.351593	3.41468	0.000638567	0.015211	Acot7	UP
Itm2c	56.4259	0.678995	0.199112	3.41013	0.00064933	0.0153321	Itm2c	UP
Rgs13	10.094	1.5497	0.454555	3.40927	0.000651373	0.0153357	Rgs13	UP
Uhrf1	8.2613	1.84717	0.542125	3.40728	0.000656147	0.0154033	Uhrf1	UP
Gpr183	72.5785	0.798301	0.234879	3.39878	0.000676884	0.0156631	Gpr183	UP
Cox20	58.2967	0.679853	0.200468	3.39133	0.000695548	0.0160035	Cox20	UP
Glud1	64.6596	0.635128	0.187968	3.37892	0.000727713	0.016463	Glud1	UP
Ndufs5	25.8848	0.922747	0.273307	3.37623	0.000734867	0.0165785	Ndufs5	UP
Trnau1ap	53.3914	0.787791	0.234007	3.36653	0.000761212	0.0171252	Trnau1ap	UP
Bst2	56.085	0.803808	0.239284	3.35922	0.000781632	0.0174874	Bst2	UP
Ccnb2	6.15593	2.39809	0.717504	3.34226	0.000830987	0.0183383	Ccnb2	UP
Ube2l6	23.7507	1.15022	0.344706	3.3368	0.000847482	0.0185747	Ube2l6	UP
Gas7	38.5931	0.827663	0.248067	3.33644	0.000848579	0.0185747	Gas7	UP
Bola2	82.0372	0.622166	0.186525	3.33556	0.00085129	0.0185838	Bola2	UP
A430093F15Rik	8.61421	1.69386	0.508978	3.32797	0.000874826	0.0189952	A430093F15Rik	UP
Ndufa12	88.0777	0.637054	0.192649	3.30681	0.00094365	0.0203508	Ndufa12	UP
Pop5	69.9434	0.646718	0.195772	3.30343	0.000955103	0.020464	Pop5	UP
Lynx1	16.7807	1.23785	0.374958	3.3013	0.000962396	0.0205658	Lynx1	UP
Kynu	34.2214	0.790999	0.241043	3.28156	0.00103233	0.0218299	Kynu	UP
Cdk19	19.6193	1.08259	0.332056	3.26025	0.00111313	0.0233389	Cdk19	UP
Cd24a	266.391	0.60281	0.184927	3.25972	0.00111522	0.0233389	Cd24a	UP
Mrps34	67.6628	0.619012	0.190129	3.25575	0.00113092	0.0235459	Mrps34	UP
Ndufa8	83.7673	0.599725	0.184407	3.25218	0.00114523	0.0237217	Ndufa8	UP
Lage3	39.3407	0.726417	0.223571	3.24915	0.00115751	0.0239149	Lage3	UP
Lockd	10.3643	1.47799	0.455793	3.24267	0.00118416	0.0242799	Lockd	UP
Adssl1	33.7908	0.92796	0.287646	3.22604	0.00125515	0.0254774	Adssl1	UP
Wdr18	46.0762	0.702734	0.218374	3.21803	0.00129075	0.0259399	Wdr18	UP
Dnmt3a	12.8677	1.26758	0.394464	3.21341	0.00131168	0.0261658	Dnmt3a	UP
Marcksl1	21.6385	1.23471	0.384551	3.21077	0.00132379	0.0263424	Marcksl1	UP
Siah2	23.7921	1.0992	0.342876	3.20581	0.00134681	0.0267349	Siah2	UP
Tcf19	9.50357	1.55702	0.48626	3.20204	0.00136458	0.0270214	Tcf19	UP
Kcns1	6.21421	2.05494	0.648498	3.16877	0.00153085	0.0291301	Kcns1	UP
Serpina3f	40.1392	0.903682	0.28525	3.16803	0.00153474	0.0291301	Serpina3f	UP
Acsl5	55.4176	0.609751	0.193945	3.14394	0.00166691	0.031396	Acsl5	UP
Ehd1	45.4565	0.787064	0.250473	3.14231	0.00167618	0.0314244	Ehd1	UP
Cyp51	33.4494	0.904932	0.289901	3.12152	0.00179918	0.0330789	Cyp51	UP
Denr	59.3987	0.628397	0.201332	3.1212	0.00180119	0.0330789	Denr	UP
Naa38	56.0409	0.59685	0.191444	3.11763	0.00182312	0.0332938	Naa38	UP
Ift140	14.0488	1.20472	0.386444	3.11746	0.00182418	0.0332938	Ift140	UP
Rexo2	79.9137	0.621662	0.200408	3.10199	0.00192225	0.0345196	Rexo2	UP
Glrx2	30.9397	0.785042	0.253796	3.0932	0.00198008	0.0352455	Glrx2	UP
R74862	9.2437	1.4053	0.454821	3.08978	0.00200302	0.0355756	R74862	UP
Rps19-ps7	18.7317	1.03518	0.335151	3.0887	0.00201036	0.0355882	Rps19-ps7	UP
Mcm2	24.7966	0.931041	0.301815	3.0848	0.00203688	0.0358623	Mcm2	UP
Nfkbie	33.6577	0.758481	0.247982	3.05862	0.00222362	0.0384809	Nfkbie	UP
Hmgb2	93.6527	0.699695	0.228933	3.05633	0.00224062	0.0386924	Hmgb2	UP
Pced1b	16.0444	1.06715	0.350907	3.04111	0.00235706	0.0397657	Pced1b	UP
Rps19-ps13	15.2922	1.16166	0.382686	3.03554	0.00240109	0.0400436	Rps19-ps13	UP
Rtp4	9.27059	1.83459	0.606233	3.02621	0.00247639	0.0409935	Rtp4	UP
Cacna1s	60.2417	0.619736	0.204802	3.02603	0.00247788	0.0409935	Cacna1s	UP
Gbp2	82.4558	0.779707	0.258028	3.02179	0.00251284	0.0413649	Gbp2	UP
Sephs2	24.7582	0.876694	0.291117	3.01149	0.00259972	0.0426455	Sephs2	UP
Rrp15	26.609	0.839718	0.279231	3.00726	0.00263618	0.0430452	Rrp15	UP
Asf1b	13.6419	1.22842	0.409907	2.99683	0.00272804	0.0442773	Asf1b	UP
Ap1s1	43.0638	0.652855	0.219638	2.97242	0.00295462	0.0471891	Ap1s1	UP
Crip2	52.2379	0.828073	0.278662	2.9716	0.00296253	0.0471891	Crip2	UP
Pdcd1lg2	26.8046	0.899247	0.303358	2.96431	0.00303363	0.0478935	Pdcd1lg2	UP
Cdca8	11.3149	1.44449	0.487443	2.96341	0.00304251	0.0479402	Cdca8	UP
Genes downregulated in B1a cells in peritoneal cavity of CD19Cre IKK2caca compared to CD19Cre mice (FC <-1.5, padj <0.05)
Gene	baseMean	log2FoldChange	lfcSE	stat	pvalue	padj	UniqueGeneName	diffexpressed
Fcrla	231.985	-1.48936	0.137614	-10.8227	2.68742e-27	1.08827e-23	Fcrla	DOWN
Tspan13	81.8768	-2.14812	0.245013	-8.76739	1.82862e-18	1.34636e-15	Tspan13	DOWN
Malat1	4049.9	-0.958726	0.114531	-8.37089	5.71851e-17	3.08761e-14	Malat1	DOWN
Smpdl3a	46.3141	-2.57971	0.336508	-7.6661	1.7731e-14	7.55806e-12	Smpdl3a	DOWN
Hepacam2	82.5575	-2.09991	0.276306	-7.59993	2.96285e-14	1.09073e-11	Hepacam2	DOWN
Fcgr2b	64.0875	-2.27723	0.306752	-7.4237	1.13894e-13	4.01055e-11	Fcgr2b	DOWN
Zcwpw1	340.809	-3.21963	0.438581	-7.34102	2.11966e-13	7.15298e-11	Zcwpw1	DOWN
Chd1	70.9405	-1.87642	0.261135	-7.18563	6.68974e-13	2.16721e-10	Chd1	DOWN
Rin3	65.8565	-1.47398	0.23248	-6.34021	2.29445e-10	5.63114e-08	Rin3	DOWN
Selplg	122.896	-1.21929	0.194921	-6.25529	3.96771e-10	8.92626e-08	Selplg	DOWN
mt-Cytb	1342.13	-0.848064	0.138177	-6.13753	8.38147e-10	1.74055e-07	mt-Cytb	DOWN
Tsc22d3	685.066	-1.08432	0.177771	-6.09954	1.06377e-09	2.15387e-07	Tsc22d3	DOWN
Mycbp2	70.2112	-1.43463	0.23643	-6.06789	1.29601e-09	2.44102e-07	Mycbp2	DOWN
Srrm2	122.455	-1.02501	0.17159	-5.97358	2.32098e-09	4.08643e-07	Srrm2	DOWN
Prkar2b	23.3905	-3.00934	0.529366	-5.68481	1.3096e-08	1.8287e-06	Prkar2b	DOWN
Kmt2e	122.576	-0.936788	0.165242	-5.66919	1.43472e-08	1.96946e-06	Kmt2e	DOWN
Abhd17b	49.5392	-1.56567	0.276911	-5.65407	1.56696e-08	2.08673e-06	Abhd17b	DOWN
Rap1gap	42.3717	-1.64496	0.291105	-5.65075	1.59745e-08	2.08673e-06	Rap1gap	DOWN
Xist	185.988	-3.31108	0.605097	-5.47198	4.45029e-08	5.2236e-06	Xist	DOWN
Smarca4	89.8307	-0.983828	0.183624	-5.35784	8.42211e-08	9.34393e-06	Smarca4	DOWN
Siglecg	319.491	-0.650509	0.123816	-5.25384	1.48958e-07	1.52711e-05	Siglecg	DOWN
Mia2	32.1788	-1.6692	0.325221	-5.13252	2.85887e-07	2.7531e-05	Mia2	DOWN
Ypel3	44.6942	-1.33912	0.269356	-4.97156	6.64155e-07	5.91098e-05	Ypel3	DOWN
Gnai2	248.33	-0.934658	0.188546	-4.95718	7.15237e-07	6.29642e-05	Gnai2	DOWN
mt-Rnr1	268.272	-0.776268	0.157418	-4.93125	8.17055e-07	6.80093e-05	mt-Rnr1	DOWN
Pim2	78.8655	-1.07554	0.218399	-4.92464	8.45147e-07	6.91399e-05	Pim2	DOWN
Klf2	427.953	-0.683739	0.139095	-4.91561	8.85071e-07	7.09722e-05	Klf2	DOWN
Ppp3r1	68.6846	-1.17794	0.242441	-4.85864	1.18193e-06	9.11664e-05	Ppp3r1	DOWN
Vav1	131.291	-0.877713	0.182414	-4.81166	1.49684e-06	0.000110208	Vav1	DOWN
Abhd12	45.9413	-1.2371	0.259119	-4.77426	1.80369e-06	0.000124855	Abhd12	DOWN
Sbk1	37.7715	-1.31816	0.276755	-4.76292	1.90815e-06	0.000130967	Sbk1	DOWN
Macf1	70.4852	-0.95561	0.201917	-4.73269	2.21564e-06	0.000149537	Macf1	DOWN
Txnip	78.3881	-0.947953	0.207987	-4.55775	5.17035e-06	0.000322113	Txnip	DOWN
Psap	238.646	-0.64746	0.14327	-4.51918	6.20809e-06	0.000383812	Psap	DOWN
Zbtb20	86.5127	-0.854663	0.190172	-4.49416	6.98441e-06	0.000428536	Zbtb20	DOWN
Tcp11l2	207.24	-0.739457	0.165761	-4.46099	8.15823e-06	0.000485835	Tcp11l2	DOWN
Rhog	198.696	-0.671036	0.150547	-4.45732	8.29905e-06	0.000490613	Rhog	DOWN
Csf2rb	50.6993	-1.28449	0.290312	-4.4245	9.66648e-06	0.000559206	Csf2rb	DOWN
mt-Rnr2	521.738	-0.781117	0.176751	-4.4193	9.90195e-06	0.000566521	mt-Rnr2	DOWN
Aff3	37.0829	-1.32098	0.299293	-4.41366	1.01637e-05	0.000575633	Aff3	DOWN
Mtch1	33.7699	-1.31861	0.300128	-4.3935	1.11541e-05	0.000614538	Mtch1	DOWN
Gng12	14.3508	-2.49592	0.571865	-4.36453	1.27394e-05	0.000683289	Gng12	DOWN
Gsto1	23.2701	-1.63879	0.382108	-4.2888	1.7964e-05	0.000920826	Gsto1	DOWN
Epcam	20.8023	-2.07178	0.484203	-4.27875	1.8795e-05	0.000945469	Epcam	DOWN
BE692007	16.1029	-2.14299	0.503132	-4.25931	2.05061e-05	0.00102518	BE692007	DOWN
Gm8995	60.4442	-0.962863	0.226297	-4.25486	2.09179e-05	0.0010364	Gm8995	DOWN
Mark3	29.1028	-1.38956	0.330964	-4.19853	2.68656e-05	0.00127883	Mark3	DOWN
Acp5	167.565	-0.749852	0.178643	-4.19748	2.69904e-05	0.00127883	Acp5	DOWN
Baz2b	65.7187	-0.950554	0.226902	-4.18926	2.79861e-05	0.00131779	Baz2b	DOWN
Marchf1	28.3288	-1.44511	0.347413	-4.15963	3.18767e-05	0.00147526	Marchf1	DOWN
Mcoln2	49.5792	-1.00735	0.242496	-4.15409	3.26582e-05	0.00150273	Mcoln2	DOWN
D10Wsu102e	40.3974	-1.30794	0.317897	-4.11436	3.88249e-05	0.00170893	D10Wsu102e	DOWN
Tmem259	32.7684	-1.30526	0.31745	-4.1117	3.92761e-05	0.00171172	Tmem259	DOWN
Rock2	19.9762	-1.73924	0.423249	-4.10925	3.96945e-05	0.00171918	Rock2	DOWN
Plekho1	17.6269	-1.79697	0.437507	-4.1073	4.00303e-05	0.0017245	Plekho1	DOWN
Mtss1	40.7735	-1.06056	0.259334	-4.08956	4.32189e-05	0.00184226	Mtss1	DOWN
Arhgef18	33.5074	-1.1667	0.288013	-4.05086	5.10301e-05	0.00214141	Arhgef18	DOWN
Atrx	47.5804	-1.03209	0.256018	-4.03131	5.54669e-05	0.00226882	Atrx	DOWN
Faah	36.4863	-1.15752	0.288688	-4.00961	6.08203e-05	0.00245066	Faah	DOWN
Ypel2	29.9327	-1.51404	0.378997	-3.99485	6.47354e-05	0.00257907	Ypel2	DOWN
Noc2l	74.9782	-0.88948	0.222667	-3.99466	6.47858e-05	0.00257907	Noc2l	DOWN
Fus	53.9635	-0.883808	0.221606	-3.98819	6.65788e-05	0.00261758	Fus	DOWN
Calhm2	28.3096	-1.26383	0.317008	-3.98675	6.69852e-05	0.00262084	Calhm2	DOWN
Dtx1	19.3452	-1.86077	0.467975	-3.97623	7.0017e-05	0.00272629	Dtx1	DOWN
5031439G07Rik	15.2582	-1.91998	0.483134	-3.97401	7.06721e-05	0.00273863	5031439G07Rik	DOWN
Rcn3	60.5913	-1.20741	0.305112	-3.95727	7.58104e-05	0.00292375	Rcn3	DOWN
Atp2b1	68.0996	-0.890285	0.225453	-3.94887	7.85217e-05	0.00301397	Atp2b1	DOWN
Nipbl	41.1557	-0.991285	0.252496	-3.92594	8.63902e-05	0.00328485	Nipbl	DOWN
Snrnp70	83.3558	-0.785157	0.202818	-3.87123	0.000108286	0.00396837	Snrnp70	DOWN
Gpd1l	41.7137	-1.04042	0.269274	-3.86381	0.000111634	0.00405436	Gpd1l	DOWN
Psmd14	176.009	-0.707166	0.183566	-3.85237	0.000116979	0.00421073	Psmd14	DOWN
Aff1	34.6819	-1.09727	0.284923	-3.85109	0.000117592	0.00421405	Aff1	DOWN
Pik3cd	71.7162	-0.759307	0.197488	-3.84483	0.000120635	0.00428519	Pik3cd	DOWN
Ctcf	50.4797	-0.904815	0.235467	-3.84264	0.000121719	0.00430483	Ctcf	DOWN
Cd63	4.9161	-5.18444	1.34975	-3.84104	0.000122512	0.00431403	Cd63	DOWN
Qars	85.5891	-0.721702	0.188019	-3.83845	0.000123813	0.00434096	Qars	DOWN
Pou2f2	84.6436	-0.764722	0.199471	-3.83376	0.000126201	0.00440561	Pou2f2	DOWN
Chd7	20.4982	-1.48365	0.387732	-3.82649	0.000129983	0.00447282	Chd7	DOWN
Btg2	93.5583	-0.671491	0.176297	-3.80886	0.000139606	0.00469158	Btg2	DOWN
Sapcd1	27.7249	-1.30163	0.341921	-3.8068	0.000140776	0.00471134	Sapcd1	DOWN
Phax	86.5703	-0.761874	0.200738	-3.79536	0.00014743	0.00487771	Phax	DOWN
S1pr1	122.834	-0.642031	0.169777	-3.78162	0.000155813	0.0051298	S1pr1	DOWN
Sertad2	10.3511	-2.47561	0.655458	-3.77691	0.000158785	0.00519768	Sertad2	DOWN
Cxcr4	10.2798	-3.32561	0.881392	-3.77313	0.000161209	0.00524352	Cxcr4	DOWN
Stk24	36.2388	-1.02513	0.273266	-3.75141	0.000175841	0.00565135	Stk24	DOWN
Nacc2	33.3381	-1.03274	0.276684	-3.73258	0.000189531	0.00601964	Nacc2	DOWN
Tent5a	9.65379	-2.57506	0.694859	-3.70587	0.000210667	0.00661315	Tent5a	DOWN
Rassf4	94.0045	-0.664732	0.179449	-3.70429	0.000211983	0.00662876	Rassf4	DOWN
Lipc	26.71	-1.23932	0.33479	-3.70179	0.000214085	0.00666876	Lipc	DOWN
Nod1	14.0502	-2.01533	0.544858	-3.69881	0.000216614	0.00672168	Nod1	DOWN
Tnrc6b	50.3319	-0.845566	0.228858	-3.69472	0.000220133	0.00677894	Tnrc6b	DOWN
Ldb1	25.5106	-1.17263	0.321446	-3.64798	0.000264315	0.00779819	Ldb1	DOWN
Jund	49.5599	-1.15313	0.316142	-3.64752	0.000264786	0.00779819	Jund	DOWN
Asph	11.1001	-2.50215	0.686551	-3.64452	0.000267886	0.00780436	Asph	DOWN
Fkbp5	8.97493	-2.7887	0.76668	-3.63737	0.000275433	0.0079539	Fkbp5	DOWN
Tra2a	35.4864	-1.10048	0.303347	-3.6278	0.00028585	0.00815922	Tra2a	DOWN
Stx4a	62.5126	-0.719865	0.199944	-3.60033	0.000317815	0.00895816	Stx4a	DOWN
Cnn3	25.1265	-1.67761	0.466641	-3.59508	0.00032429	0.00903984	Cnn3	DOWN
Gt(ROSA)26Sor	7.72812	-3.91058	1.08865	-3.59214	0.000327971	0.0090916	Gt(ROSA)26Sor	DOWN
Tcf4	89.6749	-0.630809	0.175644	-3.5914	0.00032891	0.0090916	Tcf4	DOWN
Tbc1d15	33.8781	-1.0117	0.282484	-3.58145	0.000341689	0.00936769	Tbc1d15	DOWN
Chst12	32.5185	-1.04385	0.291501	-3.58093	0.000342368	0.00936769	Chst12	DOWN
Gns	45.4418	-1.00804	0.28234	-3.57031	0.000356553	0.00969034	Gns	DOWN
Hnrnpab	68.8249	-1.00398	0.281553	-3.56587	0.000362649	0.00982306	Hnrnpab	DOWN
Ephx1	75.1245	-0.990067	0.27796	-3.5619	0.000368183	0.00993971	Ephx1	DOWN
Saraf	16.1265	-1.67281	0.470773	-3.55332	0.000380396	0.0102014	Saraf	DOWN
Creb3l2	8.66542	-2.67686	0.753668	-3.55177	0.000382651	0.010228	Creb3l2	DOWN
Pip4p1	31.1058	-1.0542	0.296889	-3.55082	0.000384033	0.0102312	Pip4p1	DOWN
Akap13	68.3643	-0.713796	0.201576	-3.54108	0.000398497	0.0105817	Akap13	DOWN
Ctbp1	54.4633	-0.816988	0.232556	-3.51309	0.000442932	0.0115347	Ctbp1	DOWN
Scimp	9.49765	-2.28123	0.649939	-3.50991	0.000448265	0.0116362	Scimp	DOWN
Tiparp	13.0058	-1.78949	0.511029	-3.50173	0.000462247	0.0119227	Tiparp	DOWN
Resf1	33.8111	-1.11961	0.320962	-3.48831	0.00048608	0.0124188	Resf1	DOWN
Hmces	69.7262	-0.74993	0.215293	-3.4833	0.000495281	0.0126141	Hmces	DOWN
Grk6	89.5541	-0.628514	0.180907	-3.47424	0.000512302	0.0129169	Grk6	DOWN
Pik3ip1	74.2343	-0.846612	0.24417	-3.46731	0.000525702	0.0130625	Pik3ip1	DOWN
Sfpq	28.4078	-1.11136	0.321848	-3.45305	0.000554279	0.0136447	Sfpq	DOWN
Sfn	38.8406	-1.06485	0.30862	-3.45037	0.000559829	0.013698	Sfn	DOWN
Asxl2	10.3173	-2.03239	0.590718	-3.44054	0.000580563	0.0141201	Asxl2	DOWN
Mxd4	26.3545	-1.15599	0.336427	-3.43608	0.000590197	0.0143114	Mxd4	DOWN
Ripor2	44.4986	-0.860613	0.250524	-3.43525	0.000592017	0.0143127	Ripor2	DOWN
Ppp2ca	32.5156	-1.02592	0.299819	-3.4218	0.000622089	0.0149504	Ppp2ca	DOWN
Gtf2i	13.7854	-1.63113	0.476905	-3.42025	0.000625637	0.0149912	Gtf2i	DOWN
Maco1	27.748	-1.13686	0.333034	-3.41366	0.000640975	0.0152236	Maco1	DOWN
Klf13	16.6646	-1.40219	0.411878	-3.40437	0.000663159	0.015479	Klf13	DOWN
Auh	48.4621	-0.952889	0.279903	-3.40436	0.000663197	0.015479	Auh	DOWN
Pik3r5	23.7365	-1.59362	0.468359	-3.40257	0.000667552	0.0155359	Pik3r5	DOWN
Plekha7	5.54078	-4.29551	1.26572	-3.39372	0.000689501	0.0159096	Plekha7	DOWN
Sbno1	29.3717	-1.00705	0.297159	-3.38893	0.000701659	0.0160984	Sbno1	DOWN
Reps1	15.4341	-1.49597	0.441618	-3.38747	0.00070541	0.0161388	Reps1	DOWN
Gm42870	21.3339	-1.24903	0.369132	-3.3837	0.000715163	0.0163158	Gm42870	DOWN
Elk4	18.4864	-1.36458	0.403439	-3.38238	0.000718614	0.0163485	Elk4	DOWN
Zbtb38	12.3612	-1.75089	0.52248	-3.35113	0.000804839	0.0179144	Zbtb38	DOWN
Psmb7	23.4623	-1.19339	0.356468	-3.34782	0.000814504	0.0180237	Psmb7	DOWN
Trim25	22.1235	-1.2143	0.363815	-3.33768	0.000844796	0.0185747	Trim25	DOWN
Ahnak	142.491	-0.586269	0.175943	-3.33216	0.00086176	0.0187618	Ahnak	DOWN
H6pd	15.8259	-1.65088	0.497769	-3.31657	0.000911303	0.0197343	H6pd	DOWN
Pcf11	12.6831	-1.63788	0.495396	-3.30621	0.000945686	0.0203508	Pcf11	DOWN
Tgoln1	24.5002	-1.10755	0.335041	-3.30573	0.000947306	0.0203508	Tgoln1	DOWN
Ebf1	36.1961	-0.879559	0.266766	-3.29712	0.000976834	0.0208194	Ebf1	DOWN
Gadd45b	5.50997	-4.27952	1.31338	-3.2584	0.00112043	0.0233876	Gadd45b	DOWN
Fbxw13	12.0469	-2.025	0.622233	-3.25441	0.00113626	0.0235964	Fbxw13	DOWN
Eif4a2	91.0862	-0.607308	0.188479	-3.22216	0.0012723	0.0257608	Eif4a2	DOWN
Relt	32.6864	-0.935595	0.290589	-3.21965	0.00128347	0.0259222	Relt	DOWN
Xrcc1	27.621	-1.00335	0.311883	-3.21706	0.00129511	0.0259632	Xrcc1	DOWN
Il6ra	43.4985	-0.882176	0.274429	-3.21458	0.00130634	0.0261236	Il6ra	DOWN
Art3	7.53001	-3.79936	1.18899	-3.19545	0.00139613	0.0274449	Art3	DOWN
Adprh	133.449	-0.5896	0.184921	-3.18838	0.00143072	0.0279865	Adprh	DOWN
Gigyf1	11.6376	-1.6352	0.512961	-3.18777	0.00143374	0.0279865	Gigyf1	DOWN
Evi5	14.6536	-1.59827	0.502472	-3.18081	0.00146862	0.0283875	Evi5	DOWN
Cacna1i	9.18363	-1.9959	0.629483	-3.17069	0.00152076	0.0291173	Cacna1i	DOWN
Retreg1	6.73043	-2.65619	0.838029	-3.16957	0.00152667	0.0291301	Retreg1	DOWN
Gatad2b	34.1123	-0.965004	0.304626	-3.16783	0.00153581	0.0291301	Gatad2b	DOWN
Mpc2	60.5309	-0.768712	0.243433	-3.15779	0.00158968	0.0300814	Mpc2	DOWN
Naprt	9.98577	-1.81871	0.576783	-3.1532	0.00161492	0.0304877	Naprt	DOWN
Mindy2	19.8763	-1.22306	0.389224	-3.14232	0.00167616	0.0314244	Mindy2	DOWN
Kctd14	22.1057	-1.20933	0.385104	-3.14027	0.00168791	0.0314599	Kctd14	DOWN
Cldnd1	29.42	-0.979672	0.312002	-3.13996	0.00168972	0.0314599	Cldnd1	DOWN
Galnt7	14.8516	-1.4065	0.449451	-3.12937	0.00175179	0.0324854	Galnt7	DOWN
Vsir	37.9282	-1.14846	0.367014	-3.12919	0.00175291	0.0324854	Vsir	DOWN
Rad9a	20.717	-1.11994	0.357977	-3.12853	0.00175684	0.0324854	Rad9a	DOWN
Selenop	34.3289	-0.942369	0.302775	-3.11244	0.00185546	0.0336912	Selenop	DOWN
Lmo4	7.19938	-2.3931	0.769039	-3.1118	0.00185949	0.0336912	Lmo4	DOWN
Jmjd1c	16.6773	-1.29005	0.414951	-3.10892	0.00187773	0.0339458	Jmjd1c	DOWN
Tuba4a	98.1071	-0.679529	0.218757	-3.10633	0.00189428	0.0341688	Tuba4a	DOWN
Ldlrap1	16.8551	-1.38091	0.444772	-3.10476	0.00190436	0.0342742	Ldlrap1	DOWN
Dhx9	10.6594	-1.75878	0.568313	-3.09473	0.00196989	0.0351413	Dhx9	DOWN
Gnb3	34.6327	-1.06314	0.344785	-3.0835	0.00204583	0.0359418	Gnb3	DOWN
Flot1	35.9541	-0.851552	0.278688	-3.05557	0.00224631	0.0387083	Flot1	DOWN
St6gal1	58.0133	-0.704371	0.230633	-3.05408	0.00225756	0.0388128	St6gal1	DOWN
Hnrnpa3	7.43294	-2.19873	0.721059	-3.04931	0.00229368	0.0390262	Hnrnpa3	DOWN
Rogdi	29.7895	-0.917836	0.301519	-3.04404	0.00233424	0.0395503	Rogdi	DOWN
Fig4	34.273	-0.888899	0.292518	-3.03878	0.00237538	0.0399133	Fig4	DOWN
Csf2rb2	4.66214	-4.03666	1.32888	-3.03763	0.00238444	0.0399474	Csf2rb2	DOWN
Coq2	12.592	-1.48215	0.488553	-3.03375	0.00241532	0.0401677	Coq2	DOWN
Terf2ip	28.3931	-0.915817	0.302733	-3.02516	0.00248499	0.0409935	Terf2ip	DOWN
Rasgrp1	49.6008	-0.718377	0.237469	-3.02514	0.00248522	0.0409935	Rasgrp1	DOWN
Fgl2	60.5643	-2.15023	0.71405	-3.01132	0.00260117	0.0426455	Fgl2	DOWN
Ets1	31.5314	-0.851452	0.283538	-3.00296	0.0026737	0.04357	Ets1	DOWN
Trp53inp1	7.07277	-2.38847	0.799009	-2.98929	0.00279626	0.0451134	Trp53inp1	DOWN
Irak1	24.8564	-1.03877	0.348066	-2.98442	0.00284119	0.0457471	Irak1	DOWN
Hbb-bs	105.954	-4.38636	1.47049	-2.98293	0.00285504	0.0458789	Hbb-bs	DOWN
Ash1l	19.6581	-1.09532	0.368674	-2.97097	0.00296856	0.0471891	Ash1l	DOWN
Haghl	19.8589	-1.2243	0.41213	-2.97067	0.00297153	0.0471891	Haghl	DOWN
Rab35	12.9252	-1.47972	0.498262	-2.96977	0.00298023	0.0472268	Rab35	DOWN
Hba-a1	38.1463	-4.85244	1.63425	-2.96922	0.00298557	0.0472268	Hba-a1	DOWN
Cbx6	10.2823	-1.7131	0.57833	-2.96214	0.00305505	0.0480443	Cbx6	DOWN
Ttc3	21.189	-1.0448	0.354365	-2.94838	0.00319448	0.0497541	Ttc3	DOWN

## Sheet: S4C
Table S4C Differentially expressed genes in peritoneal B1a cells of CD19Cre IKK2ca/ca mice compared to CD19Cre IKK2ca mice
Genes upregulated in B1a cells in peritoneal cavity of CD19Cre IKK2ca/ca compared to CD19CreIKK2ca mice (FC >1.5, padj <0.05)
Gene	baseMean	log2FoldChange	lfcSE	stat	pvalue	padj	UniqueGeneName	diffexpressed
Ms4a6c	232.631	1.49904	0.171799	8.72552	2.64957e-18	7.74998e-15	Ms4a6c	UP
Il4i1	55.0011	2.58688	0.310486	8.33173	7.96678e-17	1.55352e-13	Il4i1	UP
Ltb	439.099	1.0538	0.138598	7.60329	2.88703e-14	3.37782e-11	Ltb	UP
Ms4a4c	42.5717	2.53683	0.382648	6.62969	3.364e-11	3.2799e-08	Ms4a4c	UP
Rdh12	154.932	1.42691	0.226946	6.28743	3.22757e-10	2.69732e-07	Rdh12	UP
Nfkbia	524.396	0.800899	0.135204	5.92365	3.14872e-09	2.06948e-06	Nfkbia	UP
Mgmt	41.6899	1.87557	0.33029	5.67855	1.35837e-08	7.94649e-06	Mgmt	UP
Il12a	18.5111	3.43763	0.623598	5.51257	3.53631e-08	1.88067e-05	Il12a	UP
Cd83	230.938	0.955037	0.17935	5.325	1.00953e-07	4.5429e-05	Cd83	UP
Ly6d	933.712	0.773367	0.146471	5.28001	1.29173e-07	5.3976e-05	Ly6d	UP
Psme2	306.752	0.798183	0.15224	5.24293	1.58046e-07	6.1638e-05	Psme2	UP
Eif2s3y	13.2359	3.90321	0.746318	5.22995	1.69553e-07	6.19927e-05	Eif2s3y	UP
Ms4a6b	29.0193	2.06803	0.399812	5.17252	2.30964e-07	7.94788e-05	Ms4a6b	UP
1810046K07Rik	264.563	0.885719	0.178469	4.96286	6.94614e-07	0.000213868	1810046K07Rik	UP
H2-Q7	177.92	0.912184	0.186503	4.891	1.00326e-06	0.000293454	H2-Q7	UP
Grap	357.456	0.71386	0.148002	4.8233	1.412e-06	0.000393343	Grap	UP
B2m	3279.82	0.600708	0.125218	4.79728	1.60832e-06	0.000427666	B2m	UP
Cd52	1676.95	0.663787	0.14263	4.65392	3.25685e-06	0.00080633	Cd52	UP
Serp1	796.776	0.584845	0.125754	4.65071	3.30802e-06	0.00080633	Serp1	UP
Lta	38.6772	1.51923	0.328972	4.61812	3.87233e-06	0.000906125	Lta	UP
AW112010	132.353	0.935757	0.203961	4.58793	4.47661e-06	0.00100724	AW112010	UP
Cfp	441.133	0.822345	0.180797	4.54844	5.40447e-06	0.00112915	Cfp	UP
Marcksl1	23.153	2.04084	0.451817	4.51695	6.27361e-06	0.00126554	Marcksl1	UP
Hvcn1	170.127	0.819643	0.181814	4.50815	6.53948e-06	0.0012752	Hvcn1	UP
Lcp1	339.819	0.65761	0.146134	4.50005	6.79372e-06	0.00128204	Lcp1	UP
Slamf9	50.4292	1.41631	0.326811	4.33373	1.46606e-05	0.00252249	Slamf9	UP
Tmem134	330.384	0.630481	0.148861	4.23535	2.28194e-05	0.00381409	Tmem134	UP
Cd82	70.7718	1.07794	0.26377	4.08668	4.3759e-05	0.00691866	Cd82	UP
Swap70	194.256	0.692891	0.184013	3.76543	0.00016626	0.022105	Swap70	UP
Stk17b	72.1828	0.99674	0.267982	3.71942	0.000199679	0.0258435	Stk17b	UP
Scd1	94.1538	1.08801	0.296267	3.67241	0.000240276	0.0294723	Scd1	UP
Dusp6	24.3183	1.50116	0.413204	3.63298	0.000280167	0.0326678	Dusp6	UP
Smco4	13.0149	2.18397	0.602684	3.62373	0.000290381	0.0326678	Smco4	UP
Tes	58.3311	1.09843	0.305945	3.59029	0.000330305	0.0364582	Tes	UP
Bhlhe40	13.1539	2.09067	0.5863	3.56587	0.000362647	0.0389403	Bhlhe40	UP
1700016L21Rik	11.5741	2.20549	0.625083	3.52832	0.000418206	0.0414662	1700016L21Rik	UP
Igkv10-96	21.7043	1.57466	0.447458	3.51913	0.000432963	0.0415218	Igkv10-96	UP
Tap1	104.942	0.748352	0.215191	3.47763	0.000505876	0.0477319	Tap1	UP
Genes downregulated in B1a cells in peritoneal cavity of CD19Cre IKK2ca/ca compared to CD19CreIKK2ca mice (FC <-1.5, padj < 0.05)
Gene	baseMean	log2FoldChange	lfcSE	stat	pvalue	padj	UniqueGeneName	diffexpressed
Xist	191.166	-3.69814	0.242198	-15.2691	1.22883e-52	7.18863e-49	Xist	DOWN
Zcwpw1	144.031	-2.10623	0.25397	-8.29321	1.10232e-16	1.61214e-13	Zcwpw1	DOWN
Chd1	62.4879	-1.91099	0.322702	-5.92183	3.18382e-09	2.06948e-06	Chd1	DOWN
Smpdl3a	32.2762	-2.26599	0.419078	-5.40709	6.40563e-08	3.12274e-05	Smpdl3a	DOWN
Tspan13	51.6292	-1.57782	0.313238	-5.03712	4.72584e-07	0.00015359	Tspan13	DOWN
Rps21	348.128	-0.643058	0.145778	-4.41123	1.02787e-05	0.00187907	Rps21	DOWN
Mycbp2	60.9205	-1.37758	0.317651	-4.33677	1.44589e-05	0.00252249	Mycbp2	DOWN
Selplg	97.1062	-0.915688	0.221862	-4.12729	3.67062e-05	0.00596476	Selplg	DOWN
Prkar2b	14.8205	-2.60735	0.639585	-4.07662	4.56944e-05	0.00703453	Prkar2b	DOWN
Fcrla	156.375	-0.88161	0.220136	-4.00484	6.20608e-05	0.00930911	Fcrla	DOWN
Hepacam2	44.9161	-1.25191	0.320243	-3.90923	9.25889e-05	0.0132109	Hepacam2	DOWN
Mia2	26.4827	-1.51348	0.401554	-3.76904	0.000163875	0.022105	Mia2	DOWN
Abhd17b	38.4289	-1.29801	0.353606	-3.67077	0.000241824	0.0294723	Abhd17b	DOWN
Hnrnpab	69.2889	-1.15169	0.317138	-3.63149	0.000281788	0.0326678	Hnrnpab	DOWN
Pdcd4	18.4844	-1.89975	0.524006	-3.62544	0.000288469	0.0326678	Pdcd4	DOWN
Srrm2	103.425	-0.795188	0.22353	-3.55741	0.000374525	0.0389403	Srrm2	DOWN
Igkv12-89	216.633	-3.0206	0.857523	-3.52247	0.000427543	0.0415218	Igkv12-89	DOWN

## Sheet: S4D
Table S4D Differentially expressed genes in splenic B1a cells of CD19Cre IKK2ca mice compared to CD19Cre control mice
No significantly upregulated genes
Genes downregulated in splenic B1a cells of CD19Cre IKK2ca compared to CD19Cre mice (FC <-1.5, padj < 0.05)
GeneName	baseMean	log2FoldChange	lfcSE	stat	pvalue	padj	UniqueGeneName	diffexpressed
Igkv5-39	150.537	-4.85285	0.788438	-6.15502	7.51e-10	1.55e-05	Igkv5-39	DOWN
Igha	120.667	-4.60522	0.77151	-5.9691	2.39e-09	2.46e-05	Igha	DOWN
Ighg2b	36.7544	-4.47443	0.83824	-5.33789	9.4e-08	0.000647645	Ighg2b	DOWN

## Sheet: S4E
Table S4E Differentially expressed genes in splenic B1a cells of CD19Cre IKK2ca/ca mice compared to CD19Cre control mice
Genes upregulated in splenic B1a cells of CD19Cre IKK2ca/ca compared to CD19Cre mice (FC >1.5, padj < 0.05)
Gene	baseMean	log2FoldChange	lfcSE	stat	pvalue	padj	UniqueGeneName	diffexpressed
Il4i1	118.648	2.51981	0.210955	11.9448	6.9124e-33	3.01761e-29	Il4i1	UP
Adm	107.139	1.89652	0.22929	8.27127	1.3254e-16	3.85735e-13	Adm	UP
Mef2b	52.0144	2.88521	0.35553	8.11526	4.84758e-16	8.46484e-13	Mef2b	UP
Ackr3	27.474	3.7578	0.468539	8.02024	1.05537e-15	1.53573e-12	Ackr3	UP
Matk	67.2277	2.87815	0.361864	7.95367	1.81072e-15	2.25849e-12	Matk	UP
Cfp	217.75	1.31733	0.200267	6.57785	4.77291e-11	2.97659e-08	Cfp	UP
Bmyc	73.541	1.54053	0.236862	6.50391	7.82599e-11	4.55525e-08	Bmyc	UP
Ggh	74.8105	1.78578	0.27905	6.39947	1.55913e-10	8.00752e-08	Ggh	UP
Mndal	73.3419	1.43748	0.237065	6.06365	1.33066e-09	5.53239e-07	Mndal	UP
Lyst	25.3631	2.51388	0.42713	5.88551	3.96817e-09	1.50635e-06	Lyst	UP
Eif2s3y	11.849	3.90037	0.718306	5.42996	5.63666e-08	1.89283e-05	Eif2s3y	UP
Ighd	224.314	1.27043	0.235134	5.40298	6.55415e-08	2.01105e-05	Ighd	UP
Ddx3y	6.52293	6.41881	1.18876	5.39958	6.6797e-08	2.01105e-05	Ddx3y	UP
Grap	284.494	0.843061	0.15804	5.33449	9.5814e-08	2.78851e-05	Grap	UP
Il12a	14.2521	3.18932	0.599187	5.32274	1.02214e-07	2.87881e-05	Il12a	UP
Scd1	71.1001	1.26937	0.240027	5.28847	1.23345e-07	3.36539e-05	Scd1	UP
Mgmt	38.6583	1.80169	0.342165	5.26557	1.39757e-07	3.69762e-05	Mgmt	UP
Ly6d	884.715	0.935493	0.179525	5.21094	1.87882e-07	4.68686e-05	Ly6d	UP
Gm31718	40.2864	1.61214	0.317205	5.08234	3.72804e-07	8.79717e-05	Gm31718	UP
Cd40	74.6537	1.17138	0.231684	5.05596	4.28227e-07	9.6265e-05	Cd40	UP
Ltb	366.309	1.07485	0.212624	5.05517	4.30001e-07	9.6265e-05	Ltb	UP
Ift140	27.4283	1.84667	0.371148	4.97556	6.50591e-07	0.000135245	Ift140	UP
Wnt10a	14.7572	2.53126	0.528329	4.79106	1.65903e-06	0.000301771	Wnt10a	UP
Myof	11.016	3.14656	0.680946	4.62087	3.82128e-06	0.000629502	Myof	UP
Ccdc17	20.0903	1.88147	0.417322	4.50842	6.53108e-06	0.000950381	Ccdc17	UP
Limd2	348.373	0.648779	0.146451	4.43001	9.42266e-06	0.00126568	Limd2	UP
Sft2d2	44.6483	1.43801	0.325315	4.42036	9.85358e-06	0.00130351	Sft2d2	UP
Lynx1	39.511	1.74738	0.399644	4.37235	1.22916e-05	0.00155533	Lynx1	UP
1810073O08Rik	10.9797	2.43932	0.587468	4.15227	3.29195e-05	0.00373272	1810073O08Rik	UP
Pard6g	6.34728	4.27086	1.04333	4.09347	4.24962e-05	0.00469663	Pard6g	UP
Optn	16.0086	1.89597	0.476658	3.97764	6.96032e-05	0.00682815	Optn	UP
Pex16	30.6453	1.37169	0.345145	3.97425	7.06008e-05	0.00684907	Pex16	UP
Myl4	15.5286	1.88982	0.48486	3.89765	9.71306e-05	0.00911879	Myl4	UP
Ttn	5.66104	4.70606	1.21071	3.88702	0.000101482	0.00942597	Ttn	UP
Ahcyl2	26.9633	1.37608	0.363082	3.78999	0.000150653	0.0130233	Ahcyl2	UP
Nfkbia	349.453	0.657928	0.174011	3.78095	0.000156229	0.0132816	Nfkbia	UP
Grk3	5.78007	4.73317	1.25217	3.77996	0.000156851	0.0132816	Grk3	UP
Ctso	82.5732	0.818771	0.225465	3.63147	0.000281811	0.0215833	Ctso	UP
Trpm5	6.49057	3.44528	0.954072	3.61113	0.000304865	0.0229464	Trpm5	UP
Dlg1	15.2253	1.83708	0.513773	3.57567	0.000349327	0.0260681	Dlg1	UP
Cd200	18.6769	1.59346	0.459416	3.46845	0.000523476	0.0366237	Cd200	UP
Cd72	324.332	0.771361	0.222427	3.46793	0.000524477	0.0366237	Cd72	UP
Fras1	5.59197	3.28805	0.956435	3.43782	0.00058641	0.0386594	Fras1	UP
Sdc4	30.8304	1.29114	0.37589	3.43487	0.000592832	0.0386594	Sdc4	UP
Lck	85.8454	0.953428	0.277576	3.43484	0.000592904	0.0386594	Lck	UP
Genes downregulated in splenic B1a cells of CD19Cre IKK2ca/ca compared to CD19Cre mice (FC <-1.5, padj < 0.05)
Gene	baseMean	log2FoldChange	lfcSE	stat	pvalue	padj	UniqueGeneName	diffexpressed
Xist	177.391	-3.40404	0.230698	-14.7554	2.83984e-49	2.47947e-45	Xist	DOWN
S100a10	267.494	-1.25404	0.154188	-8.13319	4.18138e-16	8.46484e-13	S100a10	DOWN
S100a6	201.744	-1.47089	0.189538	-7.7604	8.46635e-15	9.23996e-12	S100a6	DOWN
Fxyd5	140.621	-1.53391	0.206522	-7.42735	1.10798e-13	1.07486e-10	Fxyd5	DOWN
Crip1	670.002	-1.04988	0.151617	-6.92456	4.37337e-12	3.81839e-09	Crip1	DOWN
Cyp4f18	207.109	-1.33554	0.193855	-6.88937	5.60386e-12	4.44794e-09	Cyp4f18	DOWN
Vim	328.142	-1.36679	0.203535	-6.71528	1.87711e-11	1.36575e-08	Vim	DOWN
Tsc22d3	225.743	-1.20959	0.180586	-6.69814	2.11083e-11	1.41767e-08	Tsc22d3	DOWN
Fcgr2b	69.1647	-1.95547	0.302902	-6.45576	1.07677e-10	5.8758e-08	Fcgr2b	DOWN
Fcer1g	29.5538	-3.33796	0.529309	-6.30626	2.85867e-10	1.35892e-07	Fcer1g	DOWN
Zbtb32	132.057	-1.36328	0.216359	-6.30101	2.95721e-10	1.35892e-07	Zbtb32	DOWN
Smpdl3a	34.8828	-2.30724	0.379184	-6.08476	1.16669e-09	5.09317e-07	Smpdl3a	DOWN
Acp5	118.046	-1.18628	0.196545	-6.03569	1.58288e-09	6.28186e-07	Acp5	DOWN
Tmem176b	20	-4.0569	0.73637	-5.50933	3.60198e-08	1.31037e-05	Tmem176b	DOWN
Selplg	92.6352	-1.20708	0.222281	-5.43042	5.62224e-08	1.89283e-05	Selplg	DOWN
Tagln2	211.861	-0.957264	0.176871	-5.41223	6.22459e-08	2.01105e-05	Tagln2	DOWN
Cd2	158.771	-0.93908	0.179911	-5.2197	1.79215e-07	4.60214e-05	Cd2	DOWN
Myadm	47.0657	-1.54142	0.299906	-5.13968	2.75204e-07	6.67446e-05	Myadm	DOWN
Lgals3	33.4968	-1.87076	0.37073	-5.04614	4.50818e-07	9.84022e-05	Lgals3	DOWN
Ighg2b	145.805	-5.33571	1.07115	-4.98129	6.31632e-07	0.000134507	Ighg2b	DOWN
Plac8	1038.56	-0.603771	0.122776	-4.91765	8.75905e-07	0.00017785	Plac8	DOWN
Ly6k	101.208	-1.16293	0.239589	-4.85384	1.21095e-06	0.00024029	Ly6k	DOWN
Rin3	53.6576	-1.57041	0.325318	-4.8273	1.38398e-06	0.000268523	Rin3	DOWN
C130026I21Rik	46.4185	-1.98884	0.41337	-4.81129	1.49957e-06	0.000284624	C130026I21Rik	DOWN
Igkv5-39	614.057	-4.58732	0.957267	-4.7921	1.65047e-06	0.000301771	Igkv5-39	DOWN
Rcn3	37.4123	-1.59941	0.336987	-4.7462	2.07275e-06	0.00036933	Rcn3	DOWN
Fgl2	15.5518	-3.07432	0.655229	-4.69198	2.70575e-06	0.000468266	Fgl2	DOWN
Fcrla	253.143	-0.80809	0.172309	-4.68976	2.73526e-06	0.000468266	Fcrla	DOWN
Derl3	41.7408	-3.44533	0.743356	-4.63483	3.57223e-06	0.000599791	Derl3	DOWN
Anxa2	64.5731	-1.25987	0.27468	-4.58669	4.50332e-06	0.000728119	Anxa2	DOWN
Dnajc7	311.703	-0.80128	0.175137	-4.57517	4.75835e-06	0.000751382	Dnajc7	DOWN
Arl4a	15.3732	-2.85886	0.625229	-4.5725	4.81931e-06	0.000751382	Arl4a	DOWN
Klf2	185.429	-0.789623	0.172934	-4.56603	4.97047e-06	0.000761354	Klf2	DOWN
Cxcr3	7.05447	-6.04975	1.3275	-4.55724	5.18306e-06	0.000769626	Cxcr3	DOWN
Ptpn22	99.4421	-1.00304	0.220132	-4.55652	5.20077e-06	0.000769626	Ptpn22	DOWN
Emp3	180.099	-0.779803	0.173757	-4.48791	7.19264e-06	0.0010256	Emp3	DOWN
Lsp1	649.675	-0.586594	0.130783	-4.48525	7.28291e-06	0.0010256	Lsp1	DOWN
Igkv6-20	30.3838	-5.82677	1.30328	-4.47086	7.79074e-06	0.0010797	Igkv6-20	DOWN
Ifi27l2a	171.105	-0.789522	0.177897	-4.43807	9.07685e-06	0.00123828	Ifi27l2a	DOWN
Ighg2c	10.3755	-5.63044	1.277	-4.40911	1.03798e-05	0.00135262	Ighg2c	DOWN
Fkbp11	15.6543	-3.16134	0.722544	-4.37529	1.21272e-05	0.00155533	Fkbp11	DOWN
Krtcap2	159.177	-0.886144	0.203846	-4.34712	1.37937e-05	0.00172046	Krtcap2	DOWN
Pon3	30.0961	-1.76311	0.410416	-4.29591	1.73981e-05	0.00213948	Pon3	DOWN
Ighg1	7.0348	-6.04575	1.40967	-4.28875	1.7968e-05	0.00216227	Ighg1	DOWN
Tspo	116.858	-0.819791	0.19121	-4.28739	1.80788e-05	0.00216227	Tspo	DOWN
Rasgrp2	43.1446	-1.33286	0.312522	-4.26484	2.00043e-05	0.00236024	Rasgrp2	DOWN
Igkv4-55	79.5216	-5.58788	1.32999	-4.20143	2.65235e-05	0.00304706	Igkv4-55	DOWN
Igha	449.339	-4.64307	1.12058	-4.14346	3.42101e-05	0.00382933	Igha	DOWN
Cnp	279.638	-0.645486	0.16055	-4.02045	5.8086e-05	0.00631536	Cnp	DOWN
Slpi	31.4378	-4.0021	0.995939	-4.01842	5.85895e-05	0.00631536	Slpi	DOWN
Tcp11l2	88.0493	-0.857511	0.213952	-4.00795	6.12481e-05	0.00648028	Tcp11l2	DOWN
Sdc1	16.0559	-2.80921	0.701149	-4.00658	6.16038e-05	0.00648028	Sdc1	DOWN
Tmem176a	17.5196	-2.4316	0.60778	-4.00079	6.31301e-05	0.00656178	Tmem176a	DOWN
Prdx4	58.6576	-1.48207	0.370715	-3.99788	6.39135e-05	0.00656504	Prdx4	DOWN
Cst3	215.703	-0.801373	0.201281	-3.98137	6.85193e-05	0.00682815	Cst3	DOWN
Mgst2	16.1531	-2.24103	0.563374	-3.97787	6.95359e-05	0.00682815	Mgst2	DOWN
Slfn2	103.745	-0.876326	0.22177	-3.95151	7.7658e-05	0.0074509	Slfn2	DOWN
Rabac1	146.5	-0.789134	0.203411	-3.87951	0.000104666	0.0095998	Rabac1	DOWN
Kctd14	18.5092	-1.86178	0.480154	-3.87746	0.000105553	0.0095998	Kctd14	DOWN
Gadd45b	7.16337	-5.10036	1.31709	-3.87244	0.00010775	0.0096986	Gadd45b	DOWN
Cd8b1	9.98632	-4.07104	1.05324	-3.86526	0.000110971	0.00988657	Cd8b1	DOWN
Jchain	2251.49	-3.77031	0.983341	-3.83418	0.000125983	0.0111107	Jchain	DOWN
Gt(ROSA)26Sor	9.29267	-2.93728	0.768018	-3.8245	0.00013104	0.0114411	Gt(ROSA)26Sor	DOWN
S1pr1	100.676	-0.77326	0.204684	-3.77782	0.000158205	0.0132816	S1pr1	DOWN
Cytip	73.882	-0.910231	0.241991	-3.76143	0.000168946	0.0140483	Cytip	DOWN
Gm8995	34.8796	-1.36276	0.362948	-3.7547	0.000173549	0.0142949	Gm8995	DOWN
Axl	8.57468	-4.47301	1.19833	-3.73271	0.000189432	0.0154573	Axl	DOWN
Rassf4	43.1372	-1.13867	0.307964	-3.69741	0.000217813	0.0176086	Rassf4	DOWN
H2-Q7	147.647	-0.689912	0.187563	-3.6783	0.000234789	0.0186446	H2-Q7	DOWN
Scimp	12.8353	-2.23564	0.60781	-3.67819	0.000234899	0.0186446	Scimp	DOWN
Pdlim1	34.011	-1.36413	0.374176	-3.64568	0.000266684	0.0209768	Pdlim1	DOWN
Tspan13	92.463	-0.890916	0.244879	-3.63819	0.000274565	0.0214038	Tspan13	DOWN
Hexb	51.343	-0.997112	0.274324	-3.6348	0.000278194	0.0214948	Hexb	DOWN
Cdc42se1	88.4287	-0.846054	0.23426	-3.6116	0.00030431	0.0229464	Cdc42se1	DOWN
Ifi30	163.445	-0.693713	0.195032	-3.55693	0.000375214	0.0277627	Ifi30	DOWN
Pdia6	148.304	-0.938218	0.26541	-3.53497	0.000407814	0.0299212	Pdia6	DOWN
Hepacam2	51.3129	-0.994547	0.282713	-3.51787	0.000435027	0.0316519	Hepacam2	DOWN
Itgb7	112.462	-0.748444	0.213945	-3.4983	0.000468235	0.0337864	Itgb7	DOWN
Ctsh	221.835	-0.613193	0.176446	-3.47524	0.000510389	0.0365059	Ctsh	DOWN
Susd3	50.8064	-1.01415	0.291993	-3.4732	0.000514285	0.0365059	Susd3	DOWN
Edem2	72.1714	-1.16904	0.337301	-3.46587	0.000528528	0.0366237	Edem2	DOWN
Rasa3	55.8895	-0.915439	0.264483	-3.46124	0.00053769	0.0369651	Rasa3	DOWN
Ssr4	198.617	-0.876806	0.254154	-3.44991	0.000560778	0.0382512	Ssr4	DOWN
Cnn3	11.7763	-2.17217	0.630528	-3.44501	0.000571043	0.0386495	Cnn3	DOWN
Igkv1-117	47.648	-4.73865	1.37736	-3.44037	0.00058091	0.0386594	Igkv1-117	DOWN
Cxcr4	13.2423	-1.93714	0.564001	-3.43465	0.00059333	0.0386594	Cxcr4	DOWN
Irf8	72.5385	-0.900381	0.2633	-3.4196	0.000627142	0.0405598	Irf8	DOWN
Creb3l2	11.0549	-2.36503	0.692435	-3.41552	0.000636592	0.0408683	Creb3l2	DOWN
Zfp36	58.928	-0.901458	0.264138	-3.41283	0.00064293	0.0409739	Zfp36	DOWN
AC133103.1	15.4635	-2.16617	0.635471	-3.40876	0.000652599	0.0411454	AC133103.1	DOWN
Kcnn4	54.2919	-1.18134	0.346663	-3.40773	0.000655047	0.0411454	Kcnn4	DOWN
St6gal1	35.4264	-1.2209	0.361582	-3.37655	0.000734014	0.0457762	St6gal1	DOWN
Lmna	30.1002	-1.15573	0.344151	-3.3582	0.000784524	0.0485793	Lmna	DOWN

## Sheet: S4F
Table S4F Differentially expressed genes in splenic B1a cells of CD19Cre IKK2ca/ca mice compared to CD19Cre IKK2ca mice
Genes upregulated in splenic B1a cells of CD19Cre IKK2ca/ca compared to CD19Cre IKK2ca mice (FC >1.5, padj < 0.05)
Gene	baseMean	log2FoldChange	lfcSE	stat	pvalue	padj	UniqueGeneName	diffexpressed
Il4i1	154.221	2.48572	0.28345	8.76953	1.79407e-18	3.57289e-15	Il4i1	UP
Mef2b	66.5966	3.55921	0.499889	7.12	1.07929e-12	1.71953e-09	Mef2b	UP
Ackr3	38.5816	3.09324	0.515544	5.99995	1.97377e-09	1.31026e-06	Ackr3	UP
Adm	139.015	1.52999	0.279981	5.46461	4.63925e-08	2.46375e-05	Adm	UP
Cd72	322.855	1.47612	0.278363	5.30284	1.14015e-07	5.6765e-05	Cd72	UP
Lgmn	139.089	1.18544	0.251825	4.7074	2.509e-06	0.000999335	Lgmn	UP
Mgmt	46.2095	2.0872	0.445924	4.68061	2.86024e-06	0.00103567	Mgmt	UP
Bmyc	91.4136	1.32502	0.291011	4.55317	5.28432e-06	0.0016838	Bmyc	UP
Gm31718	47.726	1.80124	0.417357	4.31582	1.59008e-05	0.00469133	Gm31718	UP
Eif2s3y	16.2899	3.78425	0.91682	4.12759	3.6659e-05	0.00912581	Eif2s3y	UP
Ddx3y	9.32905	6.50143	1.59694	4.07119	4.67737e-05	0.0112909	Ddx3y	UP
Il12a	19.2493	2.97239	0.753421	3.94519	7.97372e-05	0.0181482	Il12a	UP
Matk	89.8788	2.65968	0.676923	3.92908	8.52721e-05	0.0187925	Matk	UP
Pard6g	8.49688	6.36927	1.62604	3.91703	8.96454e-05	0.0187925	Pard6g	UP
Ighd	273.744	1.02904	0.268359	3.83456	0.000125788	0.0238578	Ighd	UP
Genes downregulated in splenic B1a cells of CD19Cre IKK2ca/ca compared to CD19Cre IKK2ca mice (FC <-1.5, padj < 0.05)
Gene	baseMean	log2FoldChange	lfcSE	stat	pvalue	padj	UniqueGeneName	diffexpressed
Igkv12-89	475.818	-4.56555	0.247067	-18.479	3.05e-76	2.43e-72	Igkv12-89	DOWN
Xist	195.589	-3.99779	0.270441	-14.7825	1.9e-49	7.57e-46	Xist	DOWN
Jchain	864.581	-2.6333	0.238335	-11.0488	2.22e-28	5.9e-25	Jchain	DOWN
Igkc	11322.8	-1.13514	0.161494	-7.02898	2.08e-12	2.76e-09	Igkc	DOWN
Igkv1-110	28.9909	-4.62325	0.684719	-6.75204	1.46e-11	1.66e-08	Igkv1-110	DOWN
S100a6	194.898	-1.70171	0.254879	-6.67655	2.45e-11	2.44e-08	S100a6	DOWN
Crip1	643.632	-1.19381	0.191681	-6.22811	4.72e-10	4.18e-07	Crip1	DOWN
Trbc2	23.6357	-4.76716	0.769441	-6.19562	5.81e-10	4.62e-07	Trbc2	DOWN
Ighm	6896.66	-1.03564	0.171074	-6.05374	1.42e-09	1.02e-06	Ighm	DOWN
Vim	306.111	-1.50791	0.265181	-5.68637	1.3e-08	7.95e-06	Vim	DOWN
Ccl5	19.797	-4.82156	0.865529	-5.57065	2.54e-08	1.44e-05	Ccl5	DOWN
Ly6c2	34.6517	-2.19923	0.440191	-4.99608	5.85e-07	0.00027416	Ly6c2	DOWN
Ifi27l2a	182.937	-1.13463	0.228023	-4.97595	6.49e-07	0.00028734	Ifi27l2a	DOWN
Cyp4f18	169.374	-1.16048	0.234867	-4.941	7.77e-07	0.00032586	Cyp4f18	DOWN
Tsc22d3	200.137	-1.19987	0.255861	-4.68954	2.74e-06	0.00103567	Tsc22d3	DOWN
Serpina3f	43.7635	-1.94637	0.421649	-4.6161	3.91e-06	0.00135429	Serpina3f	DOWN
Cd3d	12.7325	-4.46088	0.97296	-4.58485	4.54e-06	0.00150793	Cd3d	DOWN
Fxyd5	107.309	-1.2645	0.287669	-4.39568	1.1e-05	0.00338324	Fxyd5	DOWN
Acp5	103.81	-1.14737	0.270711	-4.23835	2.25e-05	0.00640616	Acp5	DOWN
Ms4a4b	10.2719	-4.16088	0.985833	-4.22068	2.44e-05	0.00656468	Ms4a4b	DOWN
Cd2	150.01	-1.02212	0.242773	-4.21017	2.55e-05	0.00656468	Cd2	DOWN
Igkv12-44	27.5797	-2.73109	0.648728	-4.20991	2.55e-05	0.00656468	Igkv12-44	DOWN
Igkv6-23	12.6084	-4.41962	1.0958	-4.03322	5.5e-05	0.0128904	Igkv6-23	DOWN
S100a10	201.987	-0.854381	0.21781	-3.9226	8.76e-05	0.0187925	S100a10	DOWN
Rap1gap	61.6506	-1.33502	0.342051	-3.90298	9.5e-05	0.0194079	Rap1gap	DOWN
Cd8b1	9.0013	-4.36641	1.12533	-3.88011	0.00010441	0.0207934	Cd8b1	DOWN
Lyz2	18.3738	-2.33342	0.60697	-3.84437	0.00012086	0.023483	Lyz2	DOWN
Igkv4-57	10.6254	-5.25767	1.38023	-3.80926	0.00013938	0.0258213	Igkv4-57	DOWN
Trac	11.3914	-3.13164	0.827695	-3.78356	0.0001546	0.0279898	Trac	DOWN
Igkj4	57.6333	-1.34119	0.358528	-3.74084	0.00018341	0.0324676	Igkj4	DOWN
