# Supplementary material for: Strong constitutive NF-κB signaling in B cells drives SLL/CLL-like lymphomagenesis and overcomes microenvironmental dependencies
Source: Leukemia. 2026 Jan 16;40(3):522–39. doi: 10.1038/s41375-025-02844-8 (PMC12960208; doi:10.1038/s41375-025-02844-8)
Supplement: Supplementary file 7 — Supplemental Table 5 IgH VDJ rearrangements [file 41375_2025_2844_MOESM7_ESM.xlsx]

## Sheet: S5A
Supplementary Table S5A IgH VDJ rearrangement analysis of lymphomas by PCR-cloning-sequencing
			Picked Colonies				IgH					CDR3
Plasmid	Lymphoma ID	Genotype	Identical	Total	Frequency	Clone	Functionality	V	V identity (%)	D	J	Length	Sequence (AA)	JUNCTION frame
J2 CS	CLL_0425	TCL1tg CD19cre	16	30	0.533333	Clone_01	productive	V1-39	98.95	D6-3	J1	13	CARTRPLWNWYFDVW	in-frame
J3 CS	CLL_0425	TCL1tg CD19cre	3	30	0.1	Clone_01	productive	V1-39	98.95	D6-3	J1	13	CARTRPLWNWYFDVW	in-frame
J3 CS	CLL_0425	TCL1tg CD19cre	24	30	0.8	Clone_02	productive	V1-4	98.95	D1-1	J3	12	CARYYGSSYWFAYW	in-frame
J2 CS	CLL_0425	TCL1tg CD19cre	13	30	0.433333	Clone_03	unproductive	V1-67 P	99.3	D2-1	J2	X	CARSTMV#YFDYW	out-of-frame
J3 CS	CLL_0425	TCL1tg CD19cre	3	30	0.1	Clone_03	unproductive	V1-67 P	99.3	D2-1	J2	X	CARSTMV#YFDYW	out-of-frame
J3 CS	CLL_32284	TCL1tg CD19cre	3	8	0.375	Clone_01	productive	V1-80	98.96	D2-3	J3	8	CATNDGFAYW	in-frame
J2 CS	CLL_32284	TCL1tg CD19cre	2	8	0.25	Clone_02	productive	V5-2	99.31	D1-1	J1	16	CARPHYYGSSRNWYFDVW	in-frame
J1 CS	CLL_32284	TCL1tg CD19cre	2	8	0.25	Clone_03	productive	V14-4	99.31	D1-1	J1	15	CTTSYTTVVADWYFDVW	in-frame
J3 CS	CLL_32284	TCL1tg CD19cre	2	8	0.25	Clone_04	unproductive	V1-67	98.96	D1-2	J3	X	CARTL##WFAYW	out-of-frame
J4 CS	CLL_1140	TCL1tg R26-IKK2ca CD19cre	30	30	1	Clone_01	unproductive	V1-67 P	99.3	D2-4	J4	16	CARWLL*LRRRHYAMDYW	in-frame
J1 CS	CLL_1140	TCL1tg R26-IKK2ca CD19cre	1	6	0.166667	Clone_01	unproductive	V1-67 P	98.96	D2-4	J4	16	CARWLL*LRRRHYAMDYW	in-frame
J1 CS	CLL_1140	TCL1tg R26-IKK2ca CD19cre	4	6	0.666667	Clone_02	unproductive	V1-67 P	99.3		J4	X	CARWLL*LRRRHYAMDYWGHRDHGHLSRRSPTIFSAAMENRCSSFILSRFSGCILKLILRTMLTTS (see V-DOMAIN Functionality comment)⌘	out-of-frame
J2 CS	CLL_31937	TCL1tg R26-IKK2ca CD19cre	8	8	1	Clone_01	unproductive	V5-2	99.3	D2-5	J2	X	CARL*##FDYW	out-of-frame
J1 CS	CLL_31938	TCL1tg R26-IKK2ca CD19cre	2	7	0.285714	Clone_01	productive	V1-62-2 (or V1-71)	98.96	D2-3	J1	17	CARHEEEGYYGLGGYFDVW	in-frame
J2 CS	CLL_31938	TCL1tg R26-IKK2ca CD19cre	2	7	0.285714	Clone_02	productive	V1-67	98.96	D2-3	J2	10	CARDYDGYFDYW	in-frame
J4 CS	CLL_31938	TCL1tg R26-IKK2ca CD19cre	7	8	0.875	Clone_03	unproductive	V1-70 P	98.96	D1-1	J4	X	CARTGGLLR**V#YYAMDYW	out-of-frame
J1 CS	CLL_31938	TCL1tg R26-IKK2ca CD19cre	2	7	0.285714	Clone_03	unproductive	V1-70 P	98.96	D1-1	J4	X	CARTGGLLR**V#YYAMDYW	out-of-frame
J3 CS	CLL_31938	TCL1tg R26-IKK2ca CD19cre	3	7	0.428571	Clone_04	unproductive	V1-82	98.96	D4-1	J3	X	CARSNW#AWFAYW	out-of-frame
J4 CS	CLL_32100	TCL1tg R26-IKK2ca CD19cre	10	10	1	Clone_01	productive	V5-6 (or V5-6-1*01)	99.31	D1-1	J2	13	CARHYYGSSYYFDYW	in-frame
J2 CS	CLL_32100	TCL1tg R26-IKK2ca CD19cre	5	8	0.625	Clone_01	productive	V5-6 (or V5-6-1*01)	99.31	D1-1	J2	13	CARHYYGSSYYFDYW	in-frame
J3 CS	CLL_32100	TCL1tg R26-IKK2ca CD19cre	2	10	0.2	Clone_01	productive	V5-6 (or V5-6-1*01)	99.31	D1-1	J2	13	CARHYYGSSYYFDYW	in-frame
J1 CS	CLL_32100	TCL1tg R26-IKK2ca CD19cre	1	10	0.1	Clone_01	productive	V5-6 (or V5-6-1*01)	99.31	D1-1	J2	13	CARHYYGSSYYFDYW	in-frame
J1 CS	CLL_32100	TCL1tg R26-IKK2ca CD19cre	5	10	0.5	Clone_02	productive	V11-2	98.61	D2-1	J1	11	CMRYGNYWYFDVW	in-frame
J2 CS	CLL_32100	TCL1tg R26-IKK2ca CD19cre	1	8	0.125	Clone_02	productive	V11-2	98.61	D2-1	J1	11	CMRYGNYWYFDVW	in-frame
J1 CS	CLL_32100	TCL1tg R26-IKK2ca CD19cre	4	10	0.4	Clone_03	unknown	V1-18	98.95		J1	X	Rearranged sequence but no junction found	null
J3 CS	CLL_32100	TCL1tg R26-IKK2ca CD19cre	3	10	0.3	Clone_04	unproductive	V1-31	99.3	D4-1	J3	X	CARYWD#FAYW	out-of-frame
J3 CS	CLL_32100	TCL1tg R26-IKK2ca CD19cre	2	10	0.2	Clone_05	unproductive	V5-2	99.3	D2-4	J3	X	CARHYYDYDGA#WFAYW	out-of-frame
J1 CS	CLL_32351	TCL1tg R26-IKK2ca CD19cre	3	8	0.375	Clone_01	productive	V12-3	98.95	D3-3	J1	12	CAGDSDGYWYFDVW	in-frame
J1 CS	CLL_32351	TCL1tg R26-IKK2ca CD19cre	2	8	0.25	Clone_02	Productive	V1-39	98.96	D1-1	J4	12	CAIDTTVVKAMDYW	in-frame
J1 CS	CLL_32371	TCL1tg R26-IKK2ca CD19cre	6	7	0.857143	Clone_01	productive	V11-2	98.61	D2-5	J1	11	CMRYSNYWYFDVW	in-frame
J3 CS	CLL_32371	TCL1tg R26-IKK2ca CD19cre	4	8	0.5	Clone_01	productive	V11-2	98.61	D2-5	J1	11	CMRYSNYWYFDVW	in-frame
J2 CS	CLL_32371	TCL1tg R26-IKK2ca CD19cre	3	8	0.375	Clone_01	productive	V11-2	98.61	D2-5	J1	11	CMRYSNYWYFDVW	in-frame
J2 CS	CLL_32371	TCL1tg R26-IKK2ca CD19cre	1	8	0.125	Clone_01	productive	V11-2	98.61	D2-5	J1	11	CMKYSNYWYFDVW	in-frame
J4 CS	CLL_32371	TCL1tg R26-IKK2ca CD19cre	2	8	0.25	Clone_02	productive	V1-82	98.96	D1-1	J2	13	CARSGYYGSSPLDYW	in-frame
J1 CS	CLL_32371	TCL1tg R26-IKK2ca CD19cre	1	7	0.142857	Clone_03	productive	V1-81	98.96	D1-1	J1	14	CAERFTTVVARYFDVW	in-frame
J2 CS	CLL_32371	TCL1tg R26-IKK2ca CD19cre	1	8	0.125	Clone_03	productive	V1-81	98.96	D1-1	J1	14	CAERFTTVVARYFDVW	in-frame
J3 CS	CLL_32274	TCL1tg R26-IKK2ca/ca CD19cre	2	10	0.2	Clone_05	productive	V1-19	96.18	D3-1	J3	10	CAREGGATLAYW	in-frame
J4 CS	CLL_32274	TCL1tg R26-IKK2ca/ca CD19cre	3	7	0.428571	Clone_03	productive	V1-54	98.96	D1-1	J3	14	CARGIRTTVVEGFAYW	in-frame
J4 CS	CLL_32274	TCL1tg R26-IKK2ca/ca CD19cre	4	7	0.571429	Clone_01	productive	V5-6 (or V5-6-1)	99.31	D4-1	J3	7	CARLTGAYW	in-frame
J3 CS	CLL_32274	TCL1tg R26-IKK2ca/ca CD19cre	3	10	0.3	Clone_01	productive	V5-6 (or V5-6-1)	99.31	D4-1	J3	7	CARLTGAYW	in-frame
J2 CS	CLL_32274	TCL1tg R26-IKK2ca/ca CD19cre	3	10	0.3	Clone_02	productive	V1-47	98.96	D4-1	J1	10	CAVANWDYFDVW	in-frame
J1 CS	CLL_32274	TCL1tg R26-IKK2ca/ca CD19cre	1	12	0.0833333	Clone_02	productive	V1-47	98.96	D4-1	J1	10	CAVANWDYFDVW	in-frame
J1 CS	CLL_32274	TCL1tg R26-IKK2ca/ca CD19cre	3	12	0.25	Clone_04	productive	V14-2	99.31	D2-13	J1	10	CAWGSFWYFDVW	in-frame
J1 CS	CLL_32274	TCL1tg R26-IKK2ca/ca CD19cre	3	12	0.25	Clone_04	productive	V1-81	98.96	D2-2	J1	11	CAYGYGYWYFDVW	in-frame
J1 CS	CLL_32274	TCL1tg R26-IKK2ca/ca CD19cre	5	12	0.416667	Clone_06	unproductive	V5-17	99.31	D1-1	J1	X	CAITTVVA##YWYFDVW	out-of-frame
J2 CS	CLL_32274	TCL1tg R26-IKK2ca/ca CD19cre	2	10	0.2	Clone_07	unproductive	V14-4	99.31	D2-4	J2	X	CTKGMITTGA#YYFDYW	out-of-frame
J1 CS	CLL_32897	TCL1tg R26-IKK2ca/ca CD19cre	2	11	0.181818	Clone_02	productive	V12-3	98.61	D2-3	J1	12	CAGDYDGYWYFDVW	in-frame
J1 CS	CLL_32897	TCL1tg R26-IKK2ca/ca CD19cre	3	11	0.272727	Clone_01	productive	V1-75	98.61	D2-12	J1	14	CARGYYGYDVWYFDVW	in-frame
J4 CS	CLL_32897	TCL1tg R26-IKK2ca/ca CD19cre	7	11	0.636364	Clone_03	unproductive	V5-2	99.31	D2-3	J2	X	CARLM#YFDYW	out-of-frame
J2 CS	CLL_32897	TCL1tg R26-IKK2ca/ca CD19cre	10	12	0.833333	Clone_03	unproductive	V5-2	99.31	D2-3	J2	X	CARLM#YFDYW	out-of-frame
J3 CS	CLL_32897	TCL1tg R26-IKK2ca/ca CD19cre	4	12	0.333333	Clone_03	unproductive	V5-2	99.31	D2-3	J2	X	CARLM#YFDYW	out-of-frame
J2 CS	CLL_33229	TCL1tg R26-IKK2ca/ca CD19cre	8	8	1	Clone_01	productive	V1-9	99.3		J2	6	CARWFDYW	in-frame
J4 CS	CLL_33229	TCL1tg R26-IKK2ca/ca CD19cre	2	10	0.2	Clone_02	productive	V1-9	99.3		J2	6	CARWFDYW	in-frame
J1 CS	CLL_33229	TCL1tg R26-IKK2ca/ca CD19cre	2	10	0.2	Clone_04	unproductive	V1-67	99.3	D2-3	J1	X	CASMMVTTT#YFDVW	out-of-frame
J1 CS	CLL_33229	TCL1tg R26-IKK2ca/ca CD19cre	3	10	0.3	Clone_03	unproductive	V1-21-1 P	98.95		J1	X	SARLR**LLVLRCL	out-of-frame
* Stop codon in CDR3 region, out-of-frame CDR3
# restored frameshift for out-of-frame junctions
= IMGT/JunctionAnalysis gives no results for this JUNCTION
¶ Same CDR3 AA sequence, VH-gene gDNA sequence differs in 3 bases (99% identical)
✚ Insert had only 85 bp,
§ Identical genomic DNA sequence and CDR3 amino acid sequence, but different Vector
∞ Sequence difference, one base deletion/insertion
$ Same CDR3 amino acid sequence, but different VH-gene

## Sheet: S5B
Supplementary Table S5B IgH VDJ rearrangement analysis of wild-type controls by PCR-cloning-sequencing
		IgH				CDR3
Sample ID	Clones	Functionality	V	D	J	Length	Sequence (AA)	JUNCTION frame
Test 1	clone_001	productive	V1-37	D1-2	J1	13	CGSVSLLRPWYFDVW	in-frame
Test 1	clone_002	productive	V1-39	D1-1	J1	17	CARGHYYGSSYFYWYFDVW	in-frame
Test 1	clone_003	productive	V1-81	D1-1	J1	10	CARGRRWYFDVW	in-frame
Test 1	clone_004	productive	V1-82	D1-1	J1	15	CARGDYYGSSYGYFDVW	in-frame
Test 1	clone_005	productive	V1-82	D1-1	J1	16	CARPITTVVARFGYFDVW	in-frame
Test 1	clone_006	productive	V1-83	D1-1	J1	12	CARTVATDWYFDVW	in-frame
Test 1	clone_007	productive	V5-17	D1-1	J1	15	CAKVSSTVVEDWYFDVW	in-frame
Test 1	clone_008	productive	V5-17	D5-7	J1	12	CASQAGNYGYFDVW	in-frame
Test 1	clone_009	productive	V14-2	D1-1	J1	13	CARYYGSSYWYFDVW	in-frame
Test 1	clone_010	productive	V1-4	D2-3	J1	14	CARSGGYSSYWYFDVW	in-frame
Test 1	clone_011	productive	V5-4	D2-3	J1	13	CAREGYDGNWYFDVW	in-frame
Test 1	clone_012	productive	V5-4	D1-1	J1	12	CARDYGSSWYFDVW	in-frame
Test 1	clone_013	productive	V14-4	D1-3	J1	11	CTTRGKYWYFDVW	in-frame
Test 1	clone_014	productive	V1-7	D2-1	J1	11	CARDGNYWYFYVW	in-frame
Test 1	clone_015	productive	V1-22	D1-1	J1	13	CARYYYGSSRYFDVW	in-frame
Test 1	clone_026	productive	V14-2	D5-5	J1	10	CARYYLWYFDVW	in-frame
Test 1	clone_046	productive	V1-4	D6-2	J1	12	CARRTVVHWYFDVW	in-frame
Test 1	clone_016	unproductive	V5-17	D1-1	J1	X	CARPKITTVVATP#WYFDVW	out-of-frame
Test 1	clone_017	unproductive	V5-17	D1-1	J1	X	CAKALLR**##WYFDVW	out-of-frame
Test 1	clone_018	unproductive	V5-2	D2-5	J1	X	CASPPTIVT#YWYFDVW	out-of-frame
Test 1	clone_019	unproductive	V5-2		J1	X	CARQ#YFDVW	out-of-frame
Test 1	clone_020	unproductive	V1-27	D2-1	J1	17	STR*RLW*LRGPYWYFDVW	in-frame
Test 1	clone_030	unproductive	V1-37	D2-4	J1	14	CARRI*NDYFWYFDVW	in-frame
Test 1	clone_032	unproductive	V5-17	D1-1	J1	X	CARGGTTVVATL##YFDVW	out-of-frame
Test 1	clone_037	unproductive	V14-2	D1-1	J1	X	CARGTTVVA#YWYFDVW	out-of-frame
Test 1	clone_021	productive	V1-39	D2-4	J2	15	CAKEGDYDYDRDYFDYW	in-frame
Test 1	clone_022	productive	V1-42	D1-1	J2	11	CARRYYGPLLDHW	in-frame
Test 1	clone_023	productive	V1-54	D1-1	J2	12	CARNGGYYSYFDYW	in-frame
Test 1	clone_024	productive	V1-82	D2-1	J2	11	CARSPLGNYFDYW	in-frame
Test 1	clone_025	productive	V14-1	D3-2	J2	11	CARDSSGFHFDYW	in-frame
Test 1	clone_027	productive	V14-4	D2-1	J2	9	CTTNYGNLDYW	in-frame
Test 1	clone_028	productive	V14-4	D1-1	J2	11	CTRRDYYGRGDYW	in-frame
Test 1	clone_029	productive	V1-19	D2-5	J2	15	CARRGKLDSNSAYFDYW	in-frame
Test 1	clone_074	productive	V1-9	D2-1	J2	10	CARTIDYGPDYW	in-frame
Test 1	clone_031	unproductive	V1-39	D1-1	J2	X	CPRSLTVVAR#FDCW	out-of-frame
Test 1	clone_033	unproductive	V5-17	D2-3	J2	X	CARKG*W##YFDYW	out-of-frame
Test 1	clone_034	unproductive	V5-17	D1-1	J2	X	CARRGGLLR*G#YYFDYW	out-of-frame
Test 1	clone_035	unproductive	V5-2	D2-2	J2	X	CARHWGGR#DYW	out-of-frame
Test 1	clone_036	unproductive	V5-2	D2-2	J2	X	CARLWLR##YYFDYW	out-of-frame
Test 1	clone_038	unproductive	V1-4	D2-2	J2	X	CAIKDT#YYFDYW	out-of-frame
Test 1	clone_039	unproductive	V1-9	D1-1	J2	X	CARRTTVVAT#FDYW	out-of-frame
Test 1	clone_040	unproductive	V5-6 (or V5-6-1)	D2-5	J2	X	CARSYYSNT*#FDYW	out-of-frame
Test 1	clone_041	unproductive	V5-6 (or V5-6-1)	D2-5	J2	X	CARHLL**LR#YFDYW	out-of-frame
Test 1	clone_042	productive	V1-81	D1-1	J3	16	CARRWSFTTVVAPYFDYW	in-frame
Test 1	clone_043	productive	V1-81	D1-1	J3	15	CAREDYYYGSSSWFAYW	in-frame
Test 1	clone_044	productive	V1-85	D3-1	J3	8	CASLGGFAYW	in-frame
Test 1	clone_045	productive	V5-17	D1-1	J3	11	CARGITTVVVGYW	in-frame
Test 1	clone_047	productive	V14-4	D1-1	J3	12	CTTNYYGSSWFAYW	in-frame
Test 1	clone_048	productive	V14-4	D1-1	J3	13	CTTPYYGSSYWFAYW	in-frame
Test 1	clone_049	productive	V14-4	D1-1	J3	12	CTIRYYGSSYEDYW	in-frame
Test 1	clone_050	productive	V1-9	D2-5	J3	13	CARGAYYSIPWFAYW	in-frame
Test 1	clone_051	productive	V1-9	D1-1	J3	13	CARYYYGSSYVFDYW	in-frame
Test 1	clone_052	productive	V1-62 (or V1-71)	D1-1	J3	17	CARHEETYYGSSYAWFAYW	in-frame
Test 1	clone_053	productive	V1-62 (or V1-71)	D3-3	J3	10	CAREGGPWFAYW	in-frame
Test 1	clone_070	productive	V1-85	D2-1	J3	12	CARVDLLRAWFAYW	in-frame
Test 1	clone_075	productive	V1S26		J3	11	CAREGYSNYFAYW =	in-frame
Test 1	clone_054	unproductive	V5-17	D3-2	J3	X	CAST##AYW	out-of-frame
Test 1	clone_055	unproductive	V10-1	D3-2	J3	X	CVRRHY#AWFAYW	out-of-frame
Test 1	clone_056	unproductive	V5-2	D5-7	J3	X	CARLLYSA#FAYW	out-of-frame
Test 1	clone_057	unproductive	V5-2	D2-5	J3	X	CARL**#FDYW	out-of-frame
Test 1	clone_058	unproductive	V14-4	D1-1	J3	X	CTT*LLR**LQ#WFAYW	out-of-frame
Test 1	clone_059	unproductive	V1-9	D2-3	J3	X	CANDGYYV#FAYW	out-of-frame
Test 1	clone_077	unproductive	V14-1	D2-2	J3	X	CIILLWLRR#FAYW	out-of-frame
Test 1	clone_060	productive	V1-39	D2-3	J4	12	CARSPDGYSAMDYW ¶	in-frame
Test 1	clone_061	productive	V1-39	D1-1	J4	14	CARIYYGSSYDGMDYW	in-frame
Test 1	clone_062	productive	V1-39	D2-3	J4	12	CARSPDGYSAMDYW ¶	in-frame
Test 1	clone_063	productive	V1-39	D2-12	J4	10	CARRSFTSMDYW	in-frame
Test 1	clone_064	productive	V1-54	D2-4	J4	17	CARREPIYYDSYYYAMDYW	in-frame
Test 1	clone_065	productive	V1-69	D1-2	J4	11	CARRLRYYAMDYW	in-frame
Test 1	clone_066	productive	V1-81	D5-7	J4	10	CAGPIYSAADSW	in-frame
Test 1	clone_067	productive	V1-82	D2-1	J4	14	CARRDGNPFYYAMDYW	in-frame
Test 1	clone_068	productive	V1-82	D1-1	J4	11	CARGSYLYAMDYW	in-frame
Test 1	clone_069	productive	V1-85	D1-1	J4	9	CARKVVSMDYW	in-frame
Test 1	clone_071	productive	V14-2	D1-1	J4	14	CARRDYYGSYYAMDYW	in-frame
Test 1	clone_072	productive	V1-7	D1-2	J4	12	CARLLGLYYAMDYW	in-frame
Test 1	clone_073	productive	V1-7	D2-3	J4	9	CASNERAMDYW	in-frame
Test 1	clone_076	unproductive	V1-67		J4	X	CARK#AMDYW	out-of-frame
Test 1	clone_078	unproductive	V5-2	D2-2	J4	X	CARGATMVTTG#YYYAMDYW	out-of-frame
Test 1	clone_079	unproductive	V5-2	D4-1	J4	X	CARPPTGT#YYAMDYW	out-of-frame
Test 1	clone_080	unproductive	V5-6 (or V5-6-1)		J4	X	CAK#YW	out-of-frame
Test 2	Clone_01	productive	V1-39 (orV1S135)	D2-10	J1	13	CARSSYGNYWYFDVW	in-frame
Test 2	Clone_02	productive	V1-62-2 (or V1-71)	D1-1	J1	14	CARHEAGSSLWYFDVW	in-frame
Test 2	Clone_03	productive	V1-62-2 (or V1-71)	D2-4	J1	14	CARHEGYDYDGYFDVW	in-frame
Test 2	Clone_04	productive	V1-85	D2-2	J1	14	CARRGKWLPYWYFDVW ⌘	in-frame
Test 2	Clone_05	productive	V1-9	D1-1	J1	15	CARPYYYGSTNWYFDVW	in-frame
Test 2	Clone_06	productive	V14-1	D2-14	J1	9	CTTVGTDFDVW	in-frame
Test 2	Clone_07	productive	V3-8	D2-4	J1	11	CARFDYHWYFDVW	in-frame
Test 2	Clone_08	productive	V5-17	D2-3	J1	16	CARRGIYDGYYDWYFDVW	in-frame
Test 2	Clone_09	productive	V5-2	D1-1	J1	12	CARTGSSYWYFDVW	in-frame
Test 2	Clone_10	productive	V1-20	D2-10	J1	12	CARSDDGDWYFDVW ✚	in-frame
Test 2	Clone_11	productive	V1-20 (or V1-39)	D2-10	J1	12	CARSDDGDWYFDVW ✚	in-frame
Test 2	Clone_12	productive	V1-20 (or V1-39)	D2-10	J1	12	CARSDDGDWYFDVW ✚	in-frame
Test 2	Clone_13	productive	V1-39	D2-10	J1	12	CARSDDGDWYFDVW ✚	in-frame
Test 2	Clone_14	productive	V1-62-2 (or V1-71)	D2-4	J1	17	CARHEQGPLYDYDWYFDVW	in-frame
Test 2	Clone_20	productive	V1-67	D1-1	J1	14	CARFYYGSSYWYFDVW	in-frame
Test 2	Clone_22	productive	V1-81	D1-1	J1	15	CARDYYGSSWGWYFDVW §	in-frame
Test 2	Clone_22	productive	V1-81	D1-1	J1	15	CARDYYGSSWGWYFDVW §	in-frame
Test 2	Clone_15	unproductive	V1-27 P	D2-3	J1	X	STRFGGYYV#WYFDVW	out-of-frame
Test 2	Clone_16	unproductive	V2-9	D1-1	J1	17	CARNPLLLLR**LRYFDVW	in-frame
Test 2	Clone_17	unproductive	V5-2	D2-2	J1	16	CARQRGLLW*GGWYFDVW	in-frame
Test 2	Clone_34	unproductive	V1-66	D2-5	J1	X	CAR*GSIVTT#YWYFDVW	out-of-frame
Test 2	Clone_18	productive	V1-62-2 (or V1-71)	D2-14	J2	13	CARHEDRSRGAFDYW	in-frame
Test 2	Clone_19	productive	V1-62-2 (or V1-71)	D1-1	J2	16	CARHEEGYYGSSSYFDYW	in-frame
Test 2	Clone_21	productive	V1-80	D3-3	J2	12	CARSGPSKRYFDYW	in-frame
Test 2	Clone_23	productive	V1-9	D2-4	J2	15	CALYYDYDEGFYYFDYW	in-frame
Test 2	Clone_24	productive	V1-9	D1-1	J2	11	CAREDYYGSSHYW	in-frame
Test 2	Clone_25	productive	V1-9	D2-5	J2	12	CARGGYSKYYFDYW	in-frame
Test 2	Clone_26	productive	V1-9	D2-5	J2	15	CARRGYSNYGGYYFDYW	in-frame
Test 2	Clone_27	productive	V14-4	D2-5	J2	12	CTTSPYSNYEGYYW	in-frame
Test 2	Clone_28	productive	V14-4	D3-3	J2	11	CTTWEIEGYFDYW	in-frame
Test 2	Clone_29	productive	V1S34		J2	9	CARSRGNPDYW =	in-frame
Test 2	Clone_30	productive	V5-17	D1-1	J2	10	CARPTTVGFDYW	in-frame
Test 2	Clone_31	productive	V5-6 (or V5-6-1)		J2	7	CARRVFDYW	in-frame
Test 2	Clone_32	productive	V1-42	D1-1	J2	11	CAILITTVVAPLW	in-frame
Test 2	Clone_38	productive	V1-47	D3-1	J2	11	CARREYSYYFDYW	in-frame
Test 2	Clone_33	unproductive	V3-8	D2-5	J2	X	CARDYSNP#YFDYW	out-of-frame
Test 2	Clone_35	unproductive	V5-2	D2-3	J2	11	CARS*WLLLFDYW	in-frame
Test 2	Clone_36	unproductive	V5-6 (or V5-6-1)	D1-1	J2	X	PGP#FDYW ∞	out-of-frame
Test 2	Clone_37	productive	V1-42	D3-3	J3	7	CARRGFAYW	in-frame
Test 2	Clone_39	productive	V1-62-2 (or V1-71)	D2-2	J3	20	CARHEEEGIYYGYDEEAWFAYW	in-frame
Test 2	Clone_40	productive	V1-67	D1-2	J3	8	CARWGLGYYW	in-frame
Test 2	Clone_41	productive	V1-7	D1-1	J3	17	CARSGDYYGSSYPAWFAYW	in-frame
Test 2	Clone_42	productive	V1-80	D2-4	J3	10	CAGGLRRGFDYW	in-frame
Test 2	Clone_43	productive	V1-82	D1-1	J3	11	CARSRDYGSSPYW	in-frame
Test 2	Clone_44	productive	V14-2	D3-2	J3	12	CARDTAQATRFAYW	in-frame
Test 2	Clone_45	productive	V14-2	D2-3	J3	11	CARLDGYYEFAYW	in-frame
Test 2	Clone_46	productive	V14-4	D3-2	J3	10	CTTPQATGFAYW	in-frame
Test 2	Clone_47	productive	V14-4	D2-1	J3	13	CTTYSYGKGVWFAYW	in-frame
Test 2	Clone_63	productive	V1-7	D2-5	J3	15	CARPNYSNYVRTWFAYW	in-frame
Test 2	Clone_65	productive	V1-82	D2-2	J3	10	CASGTGSWFAYW	in-frame
Test 2	Clone_48	unproductive	V1-4	D4-1	J3	X	CAPAGTL#WFAYW	out-of-frame
Test 2	Clone_49	unproductive	V5-2	D2-13	J3	X	CAGYYGGY#YW	out-of-frame
Test 2	Clone_50	unproductive	V5-2	D2-2	J3	X	CARPLLLWLRS#AWFAYW	out-of-frame
Test 2	Clone_51	unproductive	V5-2	D1-1	J3	X	CARRGVTTR#YW	out-of-frame
Test 2	Clone_52	unproductive	V5-6 (or V5-6-1)	D2-2	J3	X	CARQSTMVTT#VAYW	out-of-frame
Test 2	Clone_53	unproductive	V1-37	D1-1	J3	8	CARGGG*NYW	in-frame
Test 2	Clone_54	unproductive	V14-1	D1-1	J3	X	CT*LLLLR**L*#YW	out-of-frame
Test 2	Clone_55	unproductive	V2-6 (or V2-6-8)	D1-1	J3	X	CARVLLR**L#FAYW	out-of-frame
Test 2	Clone_56	productive	V1-14	D4-1	J4	9	CATTGDAMDYW	in-frame
Test 2	Clone_57	productive	V1-20	D1-1	J4	10	CARGGNYAMDYW	in-frame
Test 2	Clone_58	productive	V1-36	D1-2	J4	10	CASNDGGAMDYW	in-frame
Test 2	Clone_59	productive	V1-5	D2-10	J4	12	CARGGYGNYAMDYW $	in-frame
Test 2	Clone_60	productive	V1-54	D3-3	J4	11	CARGLANYAMDYW	in-frame
Test 2	Clone_61	productive	V1-63	D1-1	J4	12	CARGGGYYYAMDYW	in-frame
Test 2	Clone_62	productive	V1-67	D1-1	J4	5	CAIYFYW	in-frame
Test 2	Clone_64	productive	V1-81	D2-10	J4	12	CARGGYGNYAMDYW $	in-frame
Test 2	Clone_66	productive	V1-85	D2-4	J4	13	CAREITTRYYAMDYW	in-frame
Test 2	Clone_67	productive	V1-9	D4-1	J4	11	CARYWDVYAMDYW	in-frame
Test 2	Clone_68	productive	V14-2	D1-1	J4	12	CARGGYYGYAMDYW	in-frame
Test 2	Clone_69	productive	V14-2	D6-2 P	J4	11	CASAYSLYAMDYW	in-frame
Test 2	Clone_70	productive	V2-9	D1-1	J4	16	CAKHHYYGSSYGYAMDYW	in-frame
Test 2	Clone_71	productive	V1-83	D3-1	J4	10	CASPGYYAMDYW	in-frame
Test 2	Clone_72	unproductive	V5-6 (or V5-6-1)	D2-5	J4	X	CARPSNG#AMDYW	out-of-frame
Test 2	Clone_73	unproductive	V1-47	D2-5	J4	X	CPYSNYE#YYAMDYW	out-of-frame
Test 2	Clone_74	unproductive	V1-63	D2-1	J4	12	ST**LPHYYAMDYW	in-frame
Test 2	Clone_75	unproductive	V1-9	D1-1	J4	X	CAIGYYYGSSP#YAMDYW	out-of-frame
Test 2	Clone_76	unproductive	V5-2	D2-1	J4	14	CARHG*LHTYYAMDYW	in-frame
Test 3	clone_01	productive	V1-39	D2-2	J1	11	CARGGYYWYFDVW	in-frame
Test 3	clone_02	productive	V1-80	D2-3	J1	13	CARSGDGYYRYFDVW	in-frame
Test 3	clone_03	productive	V1-42	D1-1	J1	13	CARYYYGRNWYFDVW	in-frame
Test 3	clone_04	productive	V1-80	D1-1	J1	12	CHYYGSSYWYFDVW	in-frame
Test 3	clone_11	productive	V5-17	D6-3	J1	11	CARELPVRYFDVW	in-frame
Test 3	clone_05	unproductive	V1-4	D1-1	J1	X	CARDKDGYYGR##YFDVW	out-of-frame
Test 3	clone_06	unproductive	V5-2	D2-3	J1	X	CAR*WLLR#YFDVW	out-of-frame
Test 3	clone_07	unproductive	V1-67 P	D6-2	J1	X	CASGL*##WYFDVW	out-of-frame
Test 3	clone_08	unproductive	V14-2		J1	6	GFRYFDVW	in-frame
Test 3	clone_09	unproductive	V1-27 P	D2-1	J1	11	STRQSYYWYFDVW	in-frame
Test 3	clone_16	unproductive	V3-8		J1	X	CAR##YFDVW	out-of-frame
Test 3	clone_10	productive	V1-39	D2-5	J2	11	CAREGYSNYVDYW	in-frame
Test 3	clone_12	productive	V1-42	D1-1	J2	11	CARLGSNYYFDYW	in-frame
Test 3	clone_13	productive	V1-7	D3-3	J2	8	CARSGPFDYW	in-frame
Test 3	clone_14	productive	V1-4	D1-1	J2	15	CARYPLLDYGKGYFDYW	in-frame
Test 3	clone_15	unproductive	V5-17		J2	X	CA#CGYW	out-of-frame
Test 3	clone_17	unproductive	V5-2		J2	X	CARH#YFDYW	out-of-frame
Test 3	clone_18	unproductive	V5-2	D4-1	J2	X	CARHGKG#YW	out-of-frame
Test 3	clone_19	unproductive	V1-9	D2-2	J2	X	CAYLLWLRRR#FAYW	out-of-frame
Test 3	clone_20	unproductive	V10-1	D1-3	J2	X	CVRHKI#FDYW	out-of-frame
Test 3	clone_21	unproductive	V1-63	D2-3	J2	X	CARASSMMVT#YFDYW	out-of-frame
Test 3	clone_22	productive	V1-39	D2-4	J3	8	CANDYGFAYW	in-frame
Test 3	clone_23	productive	V1-47	D3-2	J3	9	CARGGSWFAYW	in-frame
Test 3	clone_24	productive	V5-17	D2-5	J3	12	CARGYYSNYGFAYW	in-frame
Test 3	clone_25	productive	V1-80	D1-1	J3	14	CARLGYYGSSAWFAYW	in-frame
Test 3	clone_26	productive	V10-3	D2-4	J3	12	CVRDNYDRTWFAYW	in-frame
Test 3	clone_27	productive	V1-67 P	D3-3	J3	7	CARRGFAYW	in-frame
Test 3	clone_35	productive	V1-80	D2-10	J3	11	CAREGVWYPFAYW	in-frame
Test 3	clone_28	unproductive	V5-2	D2-5	J3	X	CARRFYSNY#FAYW	out-of-frame
Test 3	clone_29	unproductive	V5-2	D2-2	J3	X	CARRYYGYG#FAYW	out-of-frame
Test 3	clone_30	unproductive	V5-2	D4-1	J3	X	CASPPNWD##FAYW	out-of-frame
Test 3	clone_31	unproductive	V1-67 P	D2-4	J3	12	CARDLL*LRRFAYW	in-frame
Test 3	clone_32	unproductive	V4-2	D2-12	J3	X	CARQG**LL##WFAYW	out-of-frame
Test 3	clone_33	productive	V1-42	D1-1	J4	13	CANPGGRSLYAMDYW	in-frame
Test 3	clone_34	productive	V1-39	D1-1	J4	13	CAREDGSNYYAMDYW	in-frame
Test 3	clone_36	productive	V1-84	D1-1	J4	16	CAREGYYYGSSPYAMDYW	in-frame
Test 3	clone_37	productive	V1-47	D1-1	J4	12	CARGSSYYYAMDYW	in-frame
Test 3	clone_38	productive	V1-39	D2-3	J4	10	CARSHDGSMDYW	in-frame
Test 3	clone_39	productive	V1-80	D2-4	J4	14	CARYYDYDGYYAMDYW	in-frame
Test 3	clone_40	productive	V1-47	D1-1	J4	14	CATYGSSSYYYAMDYW	in-frame
Test 3	clone_41	unproductive	V5-2	D3-3	J4	X	CAREEPS##YAMDYW	out-of-frame
Test 3	clone_42	unproductive	V5-2	D1-1	J4	X	CANLLW**R#AMDYW	out-of-frame
Test 3	clone_43	unproductive	V5-2	D2-1	J4	X	CANLLW*RR##AMDYW	out-of-frame
Test 3	clone_44	unproductive	V5-2	D2-5	J4	16	CARHPLL**PHYYAMDYW	in-frame
Test 4	Clone_01	productive	V1-85	D1-2	J1	14	CAIITTGSGNWYFDVW	in-frame
Test 4	Clone_02	productive	V5-17	D2-12	J1	14	CARHTHYSNPWYFDVW	in-frame
Test 4	Clone_03	productive	V1-42	D1-1	J1	16	CARRPPNYYGSSMDFDVW	in-frame
Test 4	Clone_04	productive	V1-85	D2-2	J1	11	CARVGYYGYFDVW	in-frame
Test 4	Clone_05	productive	V1-54	D4-1	J1	12	CARYLTGTWYFDVW	in-frame
Test 4	Clone_06	productive	V1-80	D3-3	J1	11	CASRELYWYFDVW	in-frame
Test 4	Clone_07	productive	V5-17		J1	7	CATRYFDVW	in-frame
Test 4	Clone_08	productive	V1-15	D2-3	J1	13	CTPIRGDGNWYFDVW	in-frame
Test 4	Clone_15	productive	V1-42	D2-4	J1	12	CARRDYDNWYFDVW	in-frame
Test 4	Clone_16	productive	V1-82	D1-1	J1	15	CARSGYYYGSSWYFDVW	in-frame
Test 4	Clone_10	unproductive	V1-85	D1-1	J1	X	CARGAYGSSYE#WYFDVW	out-of-frame
Test 4	Clone_11	unproductive	V1-39	D3-3	J1	X	CARRGE*#YWYFDVW	out-of-frame
Test 4	Clone_19	unproductive	V1-83	D1-1	J1	X	CARTTVV#YWYFDVW	out-of-frame
Test 4	Clone_20	unproductive	V5-2	D1-1	J1	X	CASPLMSSY#YFDVW	out-of-frame
Test 4	Clone_12	productive	V1-81	D2-2	J2	12	CAIGLRRGYYFDYW	in-frame
Test 4	Clone_13	productive	V1-81	D1-1	J2	8	CAPTVRGEKW	in-frame
Test 4	Clone_14	productive	V1-84	D2-3	J2	10	CARAYDGYFDYW	in-frame
Test 4	Clone_17	productive	V1-39	D1-1	J2	11	CARSSSLYYFDYW	in-frame
Test 4	Clone_18	productive	V1-82	D2-3	J2	9	CARWLLREDYW	in-frame
Test 4	Clone_21	unproductive	V5-2	D2-5	J2	X	CARRALL**LQLG##YFDYW	out-of-frame
Test 4	Clone_22	unproductive	V5-2	D1-1	J2	X	CARRGVTTF#YFDYW	out-of-frame
Test 4	Clone_23	unproductive	V1-9		J2	X	CASNYYGSSY	out-of-frame
Test 4	Clone_47	unproductive	V1-42	D2-1	J2	X	CARWESLW*LRP#FDYW	out-of-frame
Test 4	Clone_24	productive	V1-82	D2-5	J3	13	CAISYSNYGAWFAYW	in-frame
Test 4	Clone_25	productive	V1-4	D2-4	J3	13	CARCGGDYDEGFAYW	in-frame
Test 4	Clone_26	productive	V1-26	D3-3	J3	9	CARGGREVAYW	in-frame
Test 4	Clone_27	productive	V5-6 (or V5-6-1)	D2-3	J3	15	CARHRGYDGRHGGFAYW	in-frame
Test 4	Clone_28	productive	V1-85	D1-2	J3	10	CATLLRGGFAYW	in-frame
Test 4	Clone_29	productive	V10-1	D3-3	J3	7	CVRGDFAYW	in-frame
Test 4	Clone_36	productive	V1-80	D5-5	J3	10	CARDDLSSLAYW	in-frame
Test 4	Clone_39	productive	V1-80	D2-4	J3	13	CARSKDYDEAWFAYW	in-frame
Test 4	Clone_30	unproductive	V1-39	D1-1	J3	X	CARALYGSS#AWFAYW	out-of-frame
Test 4	Clone_31	unproductive	V1-39	D2-4	J3	X	CARGDYDR#AWFAYW	out-of-frame
Test 4	Clone_32	unproductive	V1-62-2 (or V1-71)	D1-1	J3	X	CARHEEGFTTVVARG##WFAYW	out-of-frame
Test 4	Clone_33	unproductive	V1-81	D2-4	J3	X	CARRGIT#AWFAYW	out-of-frame
Test 4	Clone_34	unproductive	V1-67 P	D2-2	J3	X	CARRGY#*	out-of-frame
Test 4	Clone_35	unproductive	V14-4	D1-1	J3	X	CT*TLYYYG#FAYW	out-of-frame
Test 4	Clone_45	unproductive	V1-37	D2-3	J3	X	CASMMVTTW#AYW	out-of-frame
Test 4	Clone_37	productive	V1-80	D1-1	J4	11	CARGGRRNAMDYW	in-frame
Test 4	Clone_38	productive	V1-62-2 (or V1-71)	D2-1	J4	12	CARHGGNYRAMDYW	in-frame
Test 4	Clone_40	productive	V1-31	D1-1	J4	16	CARSLYYYGSSNYAMDYW	in-frame
Test 4	Clone_41	productive	V1-81	D2-10	J4	17	CARSRSSYGNYVLYAMDYW	in-frame
Test 4	Clone_42	productive	V1-9	D2-4	J4	15	CARYDYDGGYYYAMDYW	in-frame
Test 4	Clone_43	productive	V1-66	D2-4	J4	12	CARYYDYGGAMDYW	in-frame
Test 4	Clone_44	productive	V1-66	D2-3	J4	12	CASDGYDGYAMDYW	in-frame
Test 4	Clone_46	unproductive	V1-67 P	D2-5	J4	X	CARRR**#YYAMDYW	out-of-frame
Test 4	Clone_09	unknown	V1-85			X
* Stop codon in CDR3 region, out-of-frame CDR3
# restored frameshift for out-of-frame junctions
= IMGT/JunctionAnalysis gives no results for this JUNCTION
¶ Same CDR3 AA sequence, VH-gene gDNA sequence differs in 3 bases (99% identical)
✚ Insert had only 85 bp,
§ Identical genomic DNA sequence and CDR3 amino acid sequence, but different Vector
∞ Sequence difference, one base deletion/insertion
$ Same CDR3 amino acid sequence, but different VH-gene

## Sheet: S5C
Supplementary Table S5C BCR RNA sequencing
Sample ID	Genotype	Age	Clonal Cluster	Color in image	cloneId	cloneCount	cloneFraction			nSeqCDR3	aaSeqCDR3		aaSeqFR4	refPoints	allCGenes		FASTA format	nSeqImputedVRegion	nSeqImputedDRegion	nSeqImputedJRegion	nSeqImputedCRegion	aaSeqImputedVRegion	Vgene Identity to germline
GS_02	CD19cre IKK2ca	> 1 year	1	red	0	33025	0.832661	V1-11	J4	TGTGGAAGGAGCTACGGTAGTAGCTATGCTATGGACTACTGG	CGRSYGSSYAMDYW	14	NA	:::::::::0:0:9:11:-7:-4:23:23:-4:42:::	IGHM	V1-11 J4 IGHM(CGRSYGSSYAMDYW)	>GS_02 1	cagatccagctgcaacagtcaggagctgagctggcgagtcctggggcatcagtgacactgtcctgcaaggcttctggctacacatttactgaccatattatgaattgggtaaaaaagaggcctggacagggccttgagtggattggaaggatttatccagtaagtggtgaaactaactacaatcaaaagttcatgggcaaggccacattctctgtagaccggtcctccagcacagtgtacatggtgttgaacagcctgacatctgaggaccctgctgtctattacTGTGGAAGG	NA		NA	qiqlqqsgaelaspgasvtlsckasgytftdhimnwvkkrpgqglewigriypvsgetnynqkfmgkatfsvdrssstvymvlnsltsedpavyyCGR	100
GS_02	CD19cre IKK2ca	> 1 year	2	grey	2	1850	0.046644	V11-2	J1	TGTATGAGATATGGTAACTACTGGTACTTCGATGTCTGG	CMRYGNYWYFDVW	13	NA	:::::::::0:1:12:::::13:4:39:::	IGHM	V11-2 J1 IGHM(CMRYGNYWYFDVW)	>GS_02 2	gaagtgcagctgttggagactggaggaggcttggtgcaacctggggggtcacggggactctcttgtgaaggctcagggttcacttttagtggcttctggatgagctgggttcgacagacacctgggaagaccctggagtggattggagacattaattctgatggcagtgcaataaactacgcaccatccataaaggatcgattcactatcttcagagacaatgacaagagcaccctgtacctgcagatgagcaatgtgcgatcggaggacacagccacgtatttcTGTATGAGATA	NA	CTACTGGTACTTCGATGTCTGGggcacagggaccacggtcaccgtctcctcag	NA	evqlletggglvqpggsrglscegsgftfsgfwmswvrqtpgktlewigdinsdgsainyapsikdrftifrdndkstlylqmsnvrsedtatyfCMR_	100
GS_03	CD19cre IKk2ca TCL1tg	5-6 months	1	red	0	20985	0.54593	V12-3	J1	TGTGCAGGAGACAGAACTGGGTACTGGTACTTCGATGTCTGG	CAGDRTGYWYFDVW	14	NA	:::::::::0:0:9:14:-2:-2:21:21:-1:42:::	IGHM	V12-3 J1 IGHM(CAGDRTGYWYFDVW)	>GS_03 1	cagatgcagcttcaggagtcaggacctggcctggtgaaaccctcacagtcactcttccttacctgctctattactggtttccccatcaccagtggttactactggatctggatccgtcagtcacctgggaaacccctagaatggatggggtacatcactcatagtggggaaactttctacaacccatctctccagagccccatctccattactagagaaacgtcaaagaaccagttcttcctccaattgaactctgtgaccacagaggacacagccatgtattacTGTGCAGGA			NA	qmqlqesgpglvkpsqslfltcsitgfpitsgyywiwirqspgkplewmgyithsgetfynpslqspisitretsknqfflqlnsvttedtamyyCAG	100
GS_03	CD19cre IKk2ca TCL1tg	5-6 months	2	red	1	6722	0.174874	V12-3	J1	TGTGCAGGAGACAGTGATGGTTACTGGTACTTCGATGTCTGG	CAGDSDGYWYFDVW	14	NA	:::::::::0:0:9:14:-4:-6:21:21:-1:42:::	IGHM	V12-3 J1 IGHM(CAGDSDGYWYFDVW)	>GS_03 2	cagatgcagcttcaggagtcaggacctggcctggtgaaaccctcacagtcactcttccttacctgctctattactggtttccccatcaccagtggttactactggatctggatccgtcagtcacctgggaaacccctagaatggatggggtacatcactcatagtggggaaactttctacaacccatctctccagagccccatctccattactagagaaacgtcaaagaaccagttcttcctccaattgaactctgtgaccacagaggacacagccatgtattacTGTGCAGGA			NA	qmqlqesgpglvkpsqslfltcsitgfpitsgyywiwirqspgkplewmgyithsgetfynpslqspisitretsknqfflqlnsvttedtamyyCAG	100
GS_03	CD19cre IKk2ca TCL1tg	5-6 months	3	blue	2	5840	0.151929	V11-2	J1	TGTATGAGATATGGTAACTACTGGTACTTCGATGTCTGG	CMRYGNYWYFDVW	13	NA	:::::::::0:1:12:::::13:4:39:::	IGHM	V11-2 J1 IGHM(CMRYGNYWYFDVW)	>GS_03 3	gaagtgcagctgttggagactggaggaggcttggtgcaacctggggggtcacggggactctcttgtgaaggctcagggttcacttttagtggcttctggatgagctgggttcgacagacacctgggaagaccctggagtggattggagacattaattctgatggcagtgcaataaactacgcaccatccataaaggatcgattcactatcttcagagacaatgacaagagcaccctgtacctgcagatgagcaatgtgcgatcggaggacacagccacgtatttcTGTATGAGATA		CTACTGGTACTTCGATGTCTGGggcacagggaccacggtcaccgtctcctcag	NA	evqlletggglvqpggsrglscegsgftfsgfwmswvrqtpgktlewigdinsdgsainyapsikdrftifrdndkstlylqmsnvrsedtatyfCMR_	100
GS_04	CD19cre IKK2ca	3 months	1	red	0	2007	0.397504	V11-2	J1	TGTATGAGATATGGTAACTACTGGTACTTCGATGTCTGG	CMRYGNYWYFDVW	13	NA	:::::::::0:1:12:::::13:4:39:::	IGHM	V11-2 J1 IGHM(CMRYGNYWYFDVW)	>GS_04 1	gaagtgcagctgttggagactggaggaggcttggtgcaacctggggggtcacggggactctcttgtgaaggctcagggttcacttttagtggcttctggatgagctgggttcgacagacacctgggaagaccctggagtggattggagacattaattctgatggcagtgcaataaactacgcaccatccataaaggatcgattcactatcttcagagacaatgacaagagcaccctgtacctgcagatgagcaatgtgcgatcggaggacacagccacgtatttcTGTATGAGATA		CTACTGGTACTTCGATGTCTGGggcacagggaccacggtcaccgtctcctcag	NA	evqlletggglvqpggsrglscegsgftfsgfwmswvrqtpgktlewigdinsdgsainyapsikdrftifrdndkstlylqmsnvrsedtatyfCMR_	100
GS_04	CD19cre IKK2ca	3 months	2	grey	1	491	0.097247	V12-3	J1	TGTGCAGGAGACAGTGATGGTTACTGGTACTTCGATGTCTGG	CAGDSDGYWYFDVW	14	NA	:::::::::0:0:9:14:-4:-6:21:21:-1:42:::	IGHM	V12-3 J1 IGHM(CAGDSDGYWYFDVW)	>GS_04 2	cagatgcagcttcaggagtcaggacctggcctggtgaaaccctcacagtcactcttccttacctgctctattactggtttccccatcaccagtggttactactggatctggatccgtcagtcacctgggaaacccctagaatggatggggtacatcactcatagtggggaaactttctacaacccatctctccagagccccatctccattactagagaaacgtcaaagaaccagttcttcctccaattgaactctgtgaccacagaggacacagccatgtattacTGTGCAGGA			NA	qmqlqesgpglvkpsqslfltcsitgfpitsgyywiwirqspgkplewmgyithsgetfynpslqspisitretsknqfflqlnsvttedtamyyCAG	100
GS_04	CD19cre IKK2ca	3 months	3	grey	2	239	0.047336	V4-1	J1	TGTGCAAGTCCTAACTGGGACTGGTACTTCGATGTCTGG	CASPNWDWYFDVW	13	NA	:::::::::0:-1:8:10:0:-2:19:19:-2:39:::	IGHM	V4-1 J1 IGHM(CASPNWDWYFDVW)	>GS_04 3				NA		100
GS_05	CD19cre IKK2ca	> 1 year	1	red	0	2439	0.426772	V11-2	J1	TGTATGAGATATGGTAACTACTGGTACTTCGATGTCTGG	CMRYGNYWYFDVW	13	NA	:::::::::0:1:12:::::13:4:39:::	IGHM	V11-2 J1 IGHM(CMRYGNYWYFDVW)	>GS_05 1	gaagtgcagctgttggagactggaggaggcttggtgcaacctggggggtcacggggactctcttgtgaaggctcagggttcacttttagtggcttctggatgagctgggttcgacagacacctgggaagaccctggagtggattggagacattaattctgatggcagtgcaataaactacgcaccatccataaaggatcgattcactatcttcagagacaatgacaagagcaccctgtacctgcagatgagcaatgtgcgatcggaggacacagccacgtatttcTGTATGAGATA		CTACTGGTACTTCGATGTCTGGggcacagggaccacggtcaccgtctcctcag	NA	evqlletggglvqpggsrglscegsgftfsgfwmswvrqtpgktlewigdinsdgsainyapsikdrftifrdndkstlylqmsnvrsedtatyfCMR_	100
GS_05	CD19cre IKK2ca	> 1 year	2	blue	1	1863	0.325984	V3-6	J2	TGTGCAAGAGAGACTACGGTAGTAGCTACAGGGTCCCCTTACTACTTTGACTACTGG	CARETTVVATGSPYYFDYW	19	NA	:::::::::0:0:11:12:-6:0:29:39:1:57:::	IGHM	V3-6 J2 IGHM(CARETTVVATGSPYYFDYW)	>GS_05 2	gatgtacagcttcaggagtcaggacctggcctcgtgaaaccttctcagtctctgtctctcacctgctctgtcactggctactccatcaccagtggttattactggaactggatccggcagtttccaggaaacaaactggaatggatgggctacataagctacgatggtagcaataactacaacccatctctcaaaaatcgaatctccatcactcgtgacacatctaagaaccagtttttcctgaagttgaattctgtgactactgaggacacagccacatattacTGTGCAAGAGA		ACTACTTTGACTACTGGggccaaggcaccactctcacagtctcctcag	NA	dvqlqesgpglvkpsqslsltcsvtgysitsgyywnwirqfpgnklewmgyisydgsnnynpslknrisitrdtsknqfflklnsvttedtatyyCAR_	100
GS_05	CD19cre IKK2ca	> 1 year	3	green	2	582	0.101837	V12-3	J1	TGTGCAGGAGACAGTGATGGTTACTGGTACTTCGATGTCTGG	CAGDSDGYWYFDVW	14	NA	:::::::::0:0:9:14:-4:-6:21:21:-1:42:::	IGHM	V12-3 J1 IGHM(CAGDSDGYWYFDVW)	>GS_05 3	cagatgcagcttcaggagtcaggacctggcctggtgaaaccctcacagtcactcttccttacctgctctattactggtttccccatcaccagtggttactactggatctggatccgtcagtcacctgggaaacccctagaatggatggggtacatcactcatagtggggaaactttctacaacccatctctccagagccccatctccattactagagaaacgtcaaagaaccagttcttcctccaattgaactctgtgaccacagaggacacagccatgtattacTGTGCAGGA			NA	qmqlqesgpglvkpsqslfltcsitgfpitsgyywiwirqspgkplewmgyithsgetfynpslqspisitretsknqfflqlnsvttedtamyyCAG	100
GS_05	CD19cre IKK2ca	> 1 year	4	grey	3	325	0.056868	V4-1	J1	TGTGCAAGTCCTAACTGGGACTGGTACTTCGATGTCTGG	CASPNWDWYFDVW	13	NA	:::::::::0:-1:8:10:0:-2:19:19:-2:39:::	IGHM	V4-1 J1 IGHM(CASPNWDWYFDVW)	>GS_05 4				NA		100
GS_06	CD19cre IKK2ca	> 1 year	1	red	0	3416	0.348999	V2-2	J3	TGTGCCAGCAATAGAGATTACTACGGTAGTAGCTACAGGGCCTGGTTTGCTTACTGG	CASNRDYYGSSYRAWFAYW	19	NA	:::::::::0:1:12:16:-3:0:36:38:2:57:::	IGHM	V2-2 J3 IGHM(CASNRDYYGSSYRAWFAYW)	>GS_06 1	caggtgcagctgaagcagtcaggacctggcctagtgcagccctcacagagcctgtccatcacctgcacagtctctggtttctcattaactagctatggtgtacactgggttcgccagtctccaggaaagggtctggagtggctgggagtgatatggagtggtggaagcacagactataatgcagctttcatatccagactgagcatcagcaaggacaattccaagagccaagttttctttaaaatgaacagtctgcaagctgatgacacagccatatattacTGTGCCAGCAA		CCTGGTTTGCTTACTGGggccaagggactctggtcactgtctctgcag	NA	qvqlkqsgpglvqpsqslsitctvsgfsltsygvhwvrqspgkglewlgviwsggstdynaafisrlsiskdnsksqvffkmnslqaddtaiyyCAS_	100
GS_06	CD19cre IKK2ca	> 1 year	2	blue	1	2671	0.272885	V1-64	J3	TGTGCAAGAGCGGGGGACTGG	CARAGDW	7	NA	:::::::::0:0:9:::::16:-12:21:::	IGHM	V1-64 J3 IGHM(CARAGDW)	>GS_06 2	caggtccaactgcagcagcctggggctgagctggtaaagcctggggcttcagtgaagttgtcctgcaaggcttctggctacactttcaccagctactggatgcactgggtgaagcagaggcctggacaaggccttgagtggattggaatgattcatcctaatagtggtagtactaactacaatgagaagttcaagagcaaggccacactgactgtagacaaatcctccagcacagcctacatgcaactcagcagcctgacatctgaggactctgcggtctattacTGTGCAAGA			NA	qvqlqqpgaelvkpgasvklsckasgytftsywmhwvkqrpgqglewigmihpnsgstnynekfkskatltvdkssstaymqlssltsedsavyyCAR	100
GS_06	CD19cre IKK2ca	> 1 year	3	green	2	2383	0.243461	V11-2	J1	TGTATGAGATATGGTAACTACTGGTACTTCGATGTCTGG	CMRYGNYWYFDVW	13	NA	:::::::::0:1:12:::::13:4:39:::	IGHM	V11-2 J1 IGHM(CMRYGNYWYFDVW)	>GS_06 3	gaagtgcagctgttggagactggaggaggcttggtgcaacctggggggtcacggggactctcttgtgaaggctcagggttcacttttagtggcttctggatgagctgggttcgacagacacctgggaagaccctggagtggattggagacattaattctgatggcagtgcaataaactacgcaccatccataaaggatcgattcactatcttcagagacaatgacaagagcaccctgtacctgcagatgagcaatgtgcgatcggaggacacagccacgtatttcTGTATGAGATA		CTACTGGTACTTCGATGTCTGGggcacagggaccacggtcaccgtctcctcag	NA	evqlletggglvqpggsrglscegsgftfsgfwmswvrqtpgktlewigdinsdgsainyapsikdrftifrdndkstlylqmsnvrsedtatyfCMR_	100
GS_06	CD19cre IKK2ca	> 1 year	4	grey	3	559	0.057111	V12-3	J1	TGTGCAGGAGACAGTGATGGTTACTGGTACTTCGATGTCTGG	CAGDSDGYWYFDVW	14	NA	:::::::::0:0:9:14:-4:-6:21:21:-1:42:::	IGHM	V12-3 J1 IGHM(CAGDSDGYWYFDVW)	>GS_06 4	cagatgcagcttcaggagtcaggacctggcctggtgaaaccctcacagtcactcttccttacctgctctattactggtttccccatcaccagtggttactactggatctggatccgtcagtcacctgggaaacccctagaatggatggggtacatcactcatagtggggaaactttctacaacccatctctccagagccccatctccattactagagaaacgtcaaagaaccagttcttcctccaattgaactctgtgaccacagaggacacagccatgtattacTGTGCAGGA			NA	qmqlqesgpglvkpsqslfltcsitgfpitsgyywiwirqspgkplewmgyithsgetfynpslqspisitretsknqfflqlnsvttedtamyyCAG	100
GS_07	CD19cre IKK2ca/ca	9-12 months	1	red	0	1194	0.525991	V11-2	J1	TGTATGAGATATGGTAACTACTGGTACTTCGATGTCTGG	CMRYGNYWYFDVW	13	NA	:::::::::0:1:12:::::13:4:39:::	IGHM	V11-2 J1 IGHM(CMRYGNYWYFDVW)	>GS_07 1	gaagtgcagctgttggagactggaggaggcttggtgcaacctggggggtcacggggactctcttgtgaaggctcagggttcacttttagtggcttctggatgagctgggttcgacagacacctgggaagaccctggagtggattggagacattaattctgatggcagtgcaataaactacgcaccatccataaaggatcgattcactatcttcagagacaatgacaagagcaccctgtacctgcagatgagcaatgtgcgatcggaggacacagccacgtatttcTGTATGAGATA		CTACTGGTACTTCGATGTCTGGggcacagggaccacggtcaccgtctcctcag	NA	evqlletggglvqpggsrglscegsgftfsgfwmswvrqtpgktlewigdinsdgsainyapsikdrftifrdndkstlylqmsnvrsedtatyfCMR_	100
GS_07	CD19cre IKK2ca/ca	9-12 months	2	blue	1	295	0.129956	V12-3	J1	TGTGCAGGAGACAGTGATGGTTACTGGTACTTCGATGTCTGG	CAGDSDGYWYFDVW	14	NA	:::::::::0:0:9:14:-4:-6:21:21:-1:42:::	IGHM	V12-3 J1 IGHM(CAGDSDGYWYFDVW)	>GS_07 2	cagatgcagcttcaggagtcaggacctggcctggtgaaaccctcacagtcactcttccttacctgctctattactggtttccccatcaccagtggttactactggatctggatccgtcagtcacctgggaaacccctagaatggatggggtacatcactcatagtggggaaactttctacaacccatctctccagagccccatctccattactagagaaacgtcaaagaaccagttcttcctccaattgaactctgtgaccacagaggacacagccatgtattacTGTGCAGGA			NA	qmqlqesgpglvkpsqslfltcsitgfpitsgyywiwirqspgkplewmgyithsgetfynpslqspisitretsknqfflqlnsvttedtamyyCAG	100
GS_07	CD19cre IKK2ca/ca	9-12 months	3	grey	2	187	0.082379	V1-55	J1	TGTGCAAGAAGGGACTACGGTAGTAGCTACTGGTACTTCGATGTCTGG	CARRDYGSSYWYFDVW	16	NA	:::::::::0:0:9:13:-6:-9:21:21:5:48:::	IGHM	V1-55 J1 IGHM(CARRDYGSSYWYFDVW)	>GS_07 3	caggtccaactgcagcagcctggggctgagcttgtgaagcctggggcttcagtgaagatgtcctgcaaggcttctggctacaccttcaccagctactggataacctgggtgaagcagaggcctggacaaggccttgagtggattggagatatttatcctggtagtggtagtactaactacaatgagaagttcaagagcaaggccacactgactgtagacacatcctccagcacagcctacatgcagctcagcagcctgacatctgaggactctgcggtctattacTGTGCAAGA		CTACTGGTACTTCGATGTCTGGggcacagggaccacggtcaccgtctcctcag	NA	qvqlqqpgaelvkpgasvkmsckasgytftsywitwvkqrpgqglewigdiypgsgstnynekfkskatltvdtssstaymqlssltsedsavyyCAR	100
GS_07	CD19cre IKK2ca/ca	9-12 months	4	grey	3	118	0.051982	V4-1	J1	TGTGCAAGTCCTAACTGGGACTGGTACTTCGATGTCTGG	CASPNWDWYFDVW	13	NA	:::::::::0:-1:8:10:0:-2:19:19:-2:39:::	IGHM	V4-1 J1 IGHM(CASPNWDWYFDVW)	>GS_07 4				NA
GS_08	CD19cre IKK2ca/ca	9-12 months	1	red	0	6078	0.176291	V9-3	J2	TGTGCAAGATCGGGGTGGGACTACTTTGACTACTGG	CARSGWDYFDYW	13	NA	:::::::::0:2:11:::::19:0:36:::	IGHM	V9-3 J2 IGHM(CARSGWDYFDYW)	>GS_08 1	cagatccagttggtacagtctggacctgagctgaagaagcctggagagacagtcaagatctcctgcaaggcttctgggtataccttcacaacctatggaatgagctgggtgaaacaggctccaggaaagggtttaaagtggatgggctggataaacacctactctggagtgccaacatatgctgatgacttcaagggacggtttgccttctctttggaaacctctgccagcactgcctatttgcagatcaacaacctcaaaaatgaggacacggctacatatttcTGTGCAAGA		ACTACTTTGACTACTGGggccaaggcaccactctcacagtctcctcag	NA	qiqlvqsgpelkkpgetvkisckasgytfttygmswvkqapgkglkwmgwintysgvptyaddfkgrfafsletsastaylqinnlknedtatyfCAR	100
GS_08	CD19cre IKK2ca/ca	9-12 months	2	blue	1	4355	0.126316	V6-6	J4	TGTACCAGGAGGCTAACTGGCTATTACTATGCTATGGACTACTGG	CTRRLTGYYYAMDYW	13	NA	:::::::::0:0:9:11:1:-3:20:21:1:45:::	IGHM	V6-6 J4 IGHM(CTRRLTGYYYAMDYW)	>GS_08 2	gaagtgaagcttgaggagtctggaggaggcttggtgcaacctggaggatccatgaaactctcttgtgctgcctctggattcacttttagtgacgcctggatggactgggtccgccagtctccagagaaggggcttgagtgggttgctgaaattagaaacaaagctaataatcatgcaacatactatgctgagtctgtgaaagggaggttcaccatctcaagagatgattccaaaagtagtgtctacctgcaaatgaacagcttaagagctgaagacactggcatttattacTGTACCAGG		ATTACTATGCTATGGACTACTGGggtcaaggaacctcagtcaccgtctcctcag	NA	evkleesggglvqpggsmklscaasgftfsdawmdwvrqspekglewvaeirnkannhatyyaesvkgrftisrddskssvylqmnslraedtgiyyCTR	100
GS_08	CD19cre IKK2ca/ca	9-12 months	3	green	2	3957	0.114772	V3-6	J2	TGTGCAAGCTCGATCTACTATGATTACGACCGGTACTACTTTGACTACTGG	CASSIYYDYDRYYFDYW	13	NA	:::::::::0:-3:8:11:2:0:30:32:2:51:::	IGHM	V3-6 J2 IGHM(CASSIYYDYDRYYFDYW)	>GS_08 3		TCTACTATGATTACGAC	ACTACTTTGACTACTGGggccaaggcaccactctcacagtctcctcag	NA
GS_08	CD19cre IKK2ca/ca	9-12 months	4	grey	3	2578	0.074774	V11-2	J1	TGTATGAGATATGGTAACTACTGGTACTTCGATGTCTGG	CMRYGNYWYFDVW	13	NA	:::::::::0:1:12:::::13:4:39:::	IGHM	V11-2 J1 IGHM(CMRYGNYWYFDVW)	>GS_08 4	gaagtgcagctgttggagactggaggaggcttggtgcaacctggggggtcacggggactctcttgtgaaggctcagggttcacttttagtggcttctggatgagctgggttcgacagacacctgggaagaccctggagtggattggagacattaattctgatggcagtgcaataaactacgcaccatccataaaggatcgattcactatcttcagagacaatgacaagagcaccctgtacctgcagatgagcaatgtgcgatcggaggacacagccacgtatttcTGTATGAGATA		CTACTGGTACTTCGATGTCTGGggcacagggaccacggtcaccgtctcctcag	NA	evqlletggglvqpggsrglscegsgftfsgfwmswvrqtpgktlewigdinsdgsainyapsikdrftifrdndkstlylqmsnvrsedtatyfCMR_	100
GS_08	CD19cre IKK2ca/ca	9-12 months	5	grey	4	2535	0.073527	V6-6	J1	TGTACTCCTTTATTACTACGGTCCTACTGGTACTTCGATGTCTGG	CTPLLLRSYWYFDVW	13	NA	:::::::::0:-4:5:8:0:-9:22:23:0:45:::	IGHM	V6-6 J1 IGHM(CTPLLLRSYWYFDVW)	>GS_08 5			CTACTGGTACTTCGATGTCTGGggcacagggaccacggtcaccgtctcctcag	NA
GS_08	CD19cre IKK2ca/ca	9-12 months	6	grey	5	1941	0.056298	V8-12	J2	TGTGCTCGAAAGGATGATTACTACGGTAGTTACTTTGACTACTGG	CARKDDYYGSYFDYW	13	NA	:::::::::0:-3:10:16:-3:-6:30:30:-2:45:::	IGHM	V8-12 J2 IGHM(CARKDDYYGSYFDYW)	>GS_08 6				NA
GS_09	CD19cre IKK2ca/ca	3 months	1	red	0	2855	0.101295	V11-2	J1	TGTATGAGATATGGTAACTACTGGTACTTCGATGTCTGG	CMRYGNYWYFDVW	13	NA	:::::::::0:1:12:::::13:4:39:::	IGHM	V11-2 J1 IGHM(CMRYGNYWYFDVW)	>GS_09 1	gaagtgcagctgttggagactggaggaggcttggtgcaacctggggggtcacggggactctcttgtgaaggctcagggttcacttttagtggcttctggatgagctgggttcgacagacacctgggaagaccctggagtggattggagacattaattctgatggcagtgcaataaactacgcaccatccataaaggatcgattcactatcttcagagacaatgacaagagcaccctgtacctgcagatgagcaatgtgcgatcggaggacacagccacgtatttcTGTATGAGATA		CTACTGGTACTTCGATGTCTGGggcacagggaccacggtcaccgtctcctcag	NA	evqlletggglvqpggsrglscegsgftfsgfwmswvrqtpgktlewigdinsdgsainyapsikdrftifrdndkstlylqmsnvrsedtatyfCMR_	100
GS_09	CD19cre IKK2ca/ca	3 months	2	grey	1	1780	0.063154	V1-15	J2	TGTACAAGAGTGAGAGGGTGG	CTRVRGW	7	NA	:::::::::0:0:9:12:15:-39:17:18:-14:21:::	IGHM	V1-15 J2 IGHM(CTRVRGW)	>GS_09 2	caggttcaactgcagcagtctggggctgagctggtgaggcctggggcttcagtgacgctgtcctgcaaggcttcgggctacacatttactgactatgaaatgcactgggtgaagcagacacctgtgcatggcctggaatggattggagctattgatcctgaaactggtggtactgcctacaatcagaagttcaagggcaaggccatactgactgcagacaaatcctccagcacagcctacatggagctccgcagcctgacatctgaggactctgccgtctattacTGTACAAGA			NA	qvqlqqsgaelvrpgasvtlsckasgytftdyemhwvkqtpvhglewigaidpetggtaynqkfkgkailtadkssstaymelrsltsedsavyyCTR	100
GS_10	CD19cre IKK2ca/ca	9-12 months	1	red	0	4084	0.366903	V11-2	J1	TGTATGAGATATGGTAACTACTGGTACTTCGATGTCTGG	CMRYGNYWYFDVW	13	NA	:::::::::0:1:12:::::13:4:39:::	IGHM	V11-2 J1 IGHM(CMRYGNYWYFDVW)	>GS_10 1	gaagtgcagctgttggagactggaggaggcttggtgcaacctggggggtcacggggactctcttgtgaaggctcagggttcacttttagtggcttctggatgagctgggttcgacagacacctgggaagaccctggagtggattggagacattaattctgatggcagtgcaataaactacgcaccatccataaaggatcgattcactatcttcagagacaatgacaagagcaccctgtacctgcagatgagcaatgtgcgatcggaggacacagccacgtatttcTGTATGAGATA		CTACTGGTACTTCGATGTCTGGggcacagggaccacggtcaccgtctcctcag	NA	evqlletggglvqpggsrglscegsgftfsgfwmswvrqtpgktlewigdinsdgsainyapsikdrftifrdndkstlylqmsnvrsedtatyfCMR_	100
GS_10	CD19cre IKK2ca/ca	9-12 months	2	blue	1	1131	0.101608	V12-3	J1	TGTGCAGGAGACAGTGATGGTTACTGGTACTTCGATGTCTGG	CAGDSDGYWYFDVW	14	NA	:::::::::0:0:9:14:-4:-6:21:21:-1:42:::	IGHM	V12-3 J1 IGHM(CAGDSDGYWYFDVW)	>GS_10 2	cagatgcagcttcaggagtcaggacctggcctggtgaaaccctcacagtcactcttccttacctgctctattactggtttccccatcaccagtggttactactggatctggatccgtcagtcacctgggaaacccctagaatggatggggtacatcactcatagtggggaaactttctacaacccatctctccagagccccatctccattactagagaaacgtcaaagaaccagttcttcctccaattgaactctgtgaccacagaggacacagccatgtattacTGTGCAGGA			NA	qmqlqesgpglvkpsqslfltcsitgfpitsgyywiwirqspgkplewmgyithsgetfynpslqspisitretsknqfflqlnsvttedtamyyCAG	100
GS_10	CD19cre IKK2ca/ca	9-12 months	3	grey	2	653	0.058665	V11-2	J1	TGTATGAGATACGGTAGTAGCTACTGGTACTTCGATGTCTGG	CMRYGSSYWYFDVW	14	NA	:::::::::0:0:11:::::15:5:42:::	IGHM	V11-2 J1 IGHM(CMRYGSSYWYFDVW)	>GS_10 3	gaagtgcagctgttggagactggaggaggcttggtgcaacctggggggtcacggggactctcttgtgaaggctcagggttcacttttagtggcttctggatgagctgggttcgacagacacctgggaagaccctggagtggattggagacattaattctgatggcagtgcaataaactacgcaccatccataaaggatcgattcactatcttcagagacaatgacaagagcaccctgtacctgcagatgagcaatgtgcgatcggaggacacagccacgtatttcTGTATGAGATA		CTACTGGTACTTCGATGTCTGGggcacagggaccacggtcaccgtctcctcag	NA	evqlletggglvqpggsrglscegsgftfsgfwmswvrqtpgktlewigdinsdgsainyapsikdrftifrdndkstlylqmsnvrsedtatyfCMR_	100
GS_10	CD19cre IKK2ca/ca	9-12 months	4	grey	3	562	0.05049	V4-1	J1	TGTGCAAGTCCTAACTGGGACTGGTACTTCGATGTCTGG	CASPNWDWYFDVW	13	NA	:::::::::0:-1:8:10:0:-2:19:19:-2:39:::	IGHM	V4-1 J1 IGHM(CASPNWDWYFDVW)	>GS_10 4				NA
GS_11	CD19cre IKK2ca/ca	3 months	1	red	0	3892	0.224452	V11-2	J1	TGTATGAGATATGGTAACTACTGGTACTTCGATGTCTGG	CMRYGNYWYFDVW	13	NA	:::::::::0:1:12:::::13:4:39:::	IGHM	V11-2 J1 IGHM(CMRYGNYWYFDVW)	>GS_11 1	gaagtgcagctgttggagactggaggaggcttggtgcaacctggggggtcacggggactctcttgtgaaggctcagggttcacttttagtggcttctggatgagctgggttcgacagacacctgggaagaccctggagtggattggagacattaattctgatggcagtgcaataaactacgcaccatccataaaggatcgattcactatcttcagagacaatgacaagagcaccctgtacctgcagatgagcaatgtgcgatcggaggacacagccacgtatttcTGTATGAGATA		CTACTGGTACTTCGATGTCTGGggcacagggaccacggtcaccgtctcctcag	NA	evqlletggglvqpggsrglscegsgftfsgfwmswvrqtpgktlewigdinsdgsainyapsikdrftifrdndkstlylqmsnvrsedtatyfCMR_	100
GS_11	CD19cre IKK2ca/ca	3 months	2	grey	1	1086	0.06263	V12-3	J1	TGTGCAGGAGACAGTGATGGTTACTGGTACTTCGATGTCTGG	CAGDSDGYWYFDVW	14	NA	:::::::::0:0:9:14:-4:-6:21:21:-1:42:::	IGHM	V12-3 J1 IGHM(CAGDSDGYWYFDVW)	>GS_11 2	cagatgcagcttcaggagtcaggacctggcctggtgaaaccctcacagtcactcttccttacctgctctattactggtttccccatcaccagtggttactactggatctggatccgtcagtcacctgggaaacccctagaatggatggggtacatcactcatagtggggaaactttctacaacccatctctccagagccccatctccattactagagaaacgtcaaagaaccagttcttcctccaattgaactctgtgaccacagaggacacagccatgtattacTGTGCAGGA			NA	qmqlqesgpglvkpsqslfltcsitgfpitsgyywiwirqspgkplewmgyithsgetfynpslqspisitretsknqfflqlnsvttedtamyyCAG	100
GS_12	CD19cre TCL1tg	9-12 months	1	red	0	15419	0.347925	V1-39	J1	TGTGCAAGAACGCGCCCCCTCTGGAACTGGTACTTCGATGTCTGG	CARTRPLWNWYFDVW	15	NA	:::::::::0:0:9:17:-10:-13:23:25:-2:45:::	IGHM		>GS_12 1	gagttccagctgcagcagtctggacctgagctggtgaagcctggcgcttcagtgaagatatcctgcaaggcttctggttactcattcactgactacaacatgaactgggtgaagcagagcaatggaaagagccttgagtggattggagtaattaatcctaactatggtactactagctacaatcagaagttcaagggcaaggccacattgactgtagaccaatcttccagcacagcctacatgcagctcaacagcctgacatctgaggactctgcagtctattacTGTGCAAGA			NA	efqlqqsgpelvkpgasvkisckasgysftdynmnwvkqsngkslewigvinpnygttsynqkfkgkatltvdqssstaymqlnsltsedsavyyCAR	100
GS_12	CD19cre TCL1tg	9-12 months	2	blue	1	10325	0.232981	V11-2	J1	TGTATGAGATACGGTAGTAGCTACTGGTACTTCGATGTCTGG	CMRYGSSYWYFDVW	14	NA	:::::::::0:0:11:::::15:5:42:::	IGHM		>GS_12 2	gaagtgcagctgttggagactggaggaggcttggtgcaacctggggggtcacggggactctcttgtgaaggctcagggttcacttttagtggcttctggatgagctgggttcgacagacacctgggaagaccctggagtggattggagacattaattctgatggcagtgcaataaactacgcaccatccataaaggatcgattcactatcttcagagacaatgacaagagcaccctgtacctgcagatgagcaatgtgcgatcggaggacacagccacgtatttcTGTATGAGATA		CTACTGGTACTTCGATGTCTGGggcacagggaccacggtcaccgtctcctcag	NA	evqlletggglvqpggsrglscegsgftfsgfwmswvrqtpgktlewigdinsdgsainyapsikdrftifrdndkstlylqmsnvrsedtatyfCMR_	100
GS_12	CD19cre TCL1tg	9-12 months	3	green	2	8405	0.189656	V11-2	J1	TGTATGAGATATGGTAACTACTGGTACTTCGATGTCTGG	CMRYGNYWYFDVW	13	NA	:::::::::0:1:12:::::13:4:39:::	IGHM		>GS_12 3	gaagtgcagctgttggagactggaggaggcttggtgcaacctggggggtcacggggactctcttgtgaaggctcagggttcacttttagtggcttctggatgagctgggttcgacagacacctgggaagaccctggagtggattggagacattaattctgatggcagtgcaataaactacgcaccatccataaaggatcgattcactatcttcagagacaatgacaagagcaccctgtacctgcagatgagcaatgtgcgatcggaggacacagccacgtatttcTGTATGAGATA		CTACTGGTACTTCGATGTCTGGggcacagggaccacggtcaccgtctcctcag	NA	evqlletggglvqpggsrglscegsgftfsgfwmswvrqtpgktlewigdinsdgsainyapsikdrftifrdndkstlylqmsnvrsedtatyfCMR_	100
GS_13	CD19cre TCL1tg	9-12 months	1	red	0	42462	0.933436	V11-2	J1	TGTATGAGATATAGTAACTACTGGTACTTCGATGTCTGG	CMRYSNYWYFDVW	13	NA	:::::::::0:2:13:::::12:5:39:::	IGHM		>GS_13 1	gaagtgcagctgttggagactggaggaggcttggtgcaacctggggggtcacggggactctcttgtgaaggctcagggttcacttttagtggcttctggatgagctgggttcgacagacacctgggaagaccctggagtggattggagacattaattctgatggcagtgcaataaactacgcaccatccataaaggatcgattcactatcttcagagacaatgacaagagcaccctgtacctgcagatgagcaatgtgcgatcggaggacacagccacgtatttcTGTATGAGATA		CTACTGGTACTTCGATGTCTGGggcacagggaccacggtcaccgtctcctcag	NA	evqlletggglvqpggsrglscegsgftfsgfwmswvrqtpgktlewigdinsdgsainyapsikdrftifrdndkstlylqmsnvrsedtatyfCMR_	100
GS_13	CD19cre TCL1tg	9-12 months	2	red	1	445	0.009782	V11-2	J1	TGTATGAGATATGGTAACTACTGGTACTTCGATGTCTGG	CMRYGNYWYFDVW	13	NA	:::::::::0:1:12:::::13:4:39:::	IGHM		>GS_13 2	gaagtgcagctgttggagactggaggaggcttggtgcaacctggggggtcacggggactctcttgtgaaggctcagggttcacttttagtggcttctggatgagctgggttcgacagacacctgggaagaccctggagtggattggagacattaattctgatggcagtgcaataaactacgcaccatccataaaggatcgattcactatcttcagagacaatgacaagagcaccctgtacctgcagatgagcaatgtgcgatcggaggacacagccacgtatttcTGTATGAGATA		CTACTGGTACTTCGATGTCTGGggcacagggaccacggtcaccgtctcctcag	NA	evqlletggglvqpggsrglscegsgftfsgfwmswvrqtpgktlewigdinsdgsainyapsikdrftifrdndkstlylqmsnvrsedtatyfCMR_	100
GS_13	CD19cre TCL1tg	9-12 months	3	grey	2	434	0.009541	V12-3	J1	TGTGCAGGAGACAGTGATGGTTACTGGTACTTCGATGTCTGG	CAGDSDGYWYFDVW	14	NA	:::::::::0:0:9:14:-4:-6:21:21:-1:42:::	IGHM		>GS_13 3	cagatgcagcttcaggagtcaggacctggcctggtgaaaccctcacagtcactcttccttacctgctctattactggtttccccatcaccagtggttactactggatctggatccgtcagtcacctgggaaacccctagaatggatggggtacatcactcatagtggggaaactttctacaacccatctctccagagccccatctccattactagagaaacgtcaaagaaccagttcttcctccaattgaactctgtgaccacagaggacacagccatgtattacTGTGCAGGA			NA	qmqlqesgpglvkpsqslfltcsitgfpitsgyywiwirqspgkplewmgyithsgetfynpslqspisitretsknqfflqlnsvttedtamyyCAG	100
GS_14	CD19cre TCL1tg	9-12 months	1	red	0	13451	0.785368	V5-12	J4	TGTGCAAGATCTGATTACGGGGGAGACTATGCTATGGACTACTGG	CARSDYGGDYAMDYW	15	NA	:::::::::0:3:12:12:-8:-2:19:25:-3:45:::	IGHM		>GS_14 1	gaagtgaagctggtggagtctgggggaggcttagtgcagcctggagggtccctgaaactctcctgtgcagcctctggattcactttcagtgactattacatgtattgggttcgccagactccagagaagaggctggagtgggtcgcatacattagtaatggtggtggtagcacctattatccagacactgtaaagggccgattcaccatctccagagacaatgccaagaacaccctgtacctgcaaatgagccgtctgaagtctgaggacacagccatgtattacTGTGCAAGA	NA		NA	evklvesggglvqpggslklscaasgftfsdyymywvrqtpekrlewvayisngggstyypdtvkgrftisrdnakntlylqmsrlksedtamyyCAR	100
GS_14	CD19cre TCL1tg	9-12 months	2	blue	1	1480	0.086413	V11-2	J1	TGTATGAGATATGGTAACTACTGGTACTTCGATGTCTGG	CMRYGNYWYFDVW	13	NA	:::::::::0:1:12:::::13:4:39:::	IGHM		>GS_14 2	gaagtgcagctgttggagactggaggaggcttggtgcaacctggggggtcacggggactctcttgtgaaggctcagggttcacttttagtggcttctggatgagctgggttcgacagacacctgggaagaccctggagtggattggagacattaattctgatggcagtgcaataaactacgcaccatccataaaggatcgattcactatcttcagagacaatgacaagagcaccctgtacctgcagatgagcaatgtgcgatcggaggacacagccacgtatttcTGTATGAGATA	NA	CTACTGGTACTTCGATGTCTGGggcacagggaccacggtcaccgtctcctcag	NA	evqlletggglvqpggsrglscegsgftfsgfwmswvrqtpgktlewigdinsdgsainyapsikdrftifrdndkstlylqmsnvrsedtatyfCMR_	100
GS_15	CD19cre TCL1tg	9-12 months	1	red	0	27439	0.945814	V1-42	J2	TGTGCAAGATTTATTACTACGGTAGTAGCTGACTACTGG	CARFITTVVADYW	13	NA	:::::::::0:1:10:10:-1:-3:29:29:-7:39:::	IGHM		>GS_15 1	gaggtccagctgcagcagtctggacctgagctggtgaagcctggggcttcagtgaagatatcctgcaaggcttctggttactcattcactggctactacatgaactgggtgaagcaaagtcctgaaaagagccttgagtggattggagagattaatcctagcactggtggtactacctacaaccagaagttcaaggccaaggccacattgactgtagacaaatcctccagcacagcctacatgcagctcaagagcctgacatctgaggactctgcagtctattacTGTGCAAGA	NA		NA	evqlqqsgpelvkpgasvkisckasgysftgyymnwvkqspekslewigeinpstggttynqkfkakatltvdkssstaymqlksltsedsavyyCAR	100
GS_16	CD19cre TCL1tg	9-12 months	1	red	0	18889	0.949769	V12-3	J1	TGTGCAGGAGACTATGATGGTTACTGGTACTTCGATGTCTGG	CAGDYDGYWYFDVW	14	NA	:::::::::0:0:9:11:-1:-6:21:21:-1:42:::	IGHM		>GS_16 1	cagatgcagcttcaggagtcaggacctggcctggtgaaaccctcacagtcactcttccttacctgctctattactggtttccccatcaccagtggttactactggatctggatccgtcagtcacctgggaaacccctagaatggatggggtacatcactcatagtggggaaactttctacaacccatctctccagagccccatctccattactagagaaacgtcaaagaaccagttcttcctccaattgaactctgtgaccacagaggacacagccatgtattacTGTGCAGGA			NA	qmqlqesgpglvkpsqslfltcsitgfpitsgyywiwirqspgkplewmgyithsgetfynpslqspisitretsknqfflqlnsvttedtamyyCAG	100
GS_17	CD19cre IKk2ca TCL1tg	5-6 months	1	red	0	8105	0.3125	V11-2	J1	TGTATGAGATATAGTAACTACTGGTACTTCGATGTCTGG	CMRYSNYWYFDVW	13	NA	:::::::::0:2:13:::::12:5:39:::	IGHM		>GS_17 1	gaagtgcagctgttggagactggaggaggcttggtgcaacctggggggtcacggggactctcttgtgaaggctcagggttcacttttagtggcttctggatgagctgggttcgacagacacctgggaagaccctggagtggattggagacattaattctgatggcagtgcaataaactacgcaccatccataaaggatcgattcactatcttcagagacaatgacaagagcaccctgtacctgcagatgagcaatgtgcgatcggaggacacagccacgtatttcTGTATGAGATA		CTACTGGTACTTCGATGTCTGGggcacagggaccacggtcaccgtctcctcag	NA	gaagtgcagctgttggagactggaggaggcttggtgcaacctggggggtcacggggactctcttgtgaaggctcagggttcacttttagtggcttctggatgagctgggttcgacagacacctgggaagaccctggagtggattggagacattaattctgatggcagtgcaataaactacgcaccatccataaaggatcgattcactatcttcagagacaatgacaagagcaccctgtacctgcagatgagcaatgtgcgatcggaggacacagccacgtatttcTGTATGAGATA	100
GS_17	CD19cre IKk2ca TCL1tg	5-6 months	2	blue	1	4385	0.16907	V7-1	J1	TGTGCAAGAGATGCTAGTAACTGGTACTTCGATGTCTGG	CARDASNWYFDVW	13	NA	:::::::::0:-1:14:14:7:-19:19:19:-2:39:::	IGHM		>GS_17 2				NA
GS_17	CD19cre IKk2ca TCL1tg	5-6 months	3	grey	2	2250	0.086752	V14-2	J4	TGTGCTAGCTTCTACTACGGTAGTAGCTACGGATACTATGCTATGGACTACTGG	CASFYYGSSYGYYAMDYW	18	NA	:::::::::0:-1:8:12:-5:1:31:33:-2:54:::	IGHM		>GS_17 3				NA
GS_17	CD19cre IKk2ca TCL1tg	5-6 months	4	red	3	1339	0.051627	V7-1	J1	TGTGCAAGAGATAGTAACTACTGGTACTTCGATGTCTGG	CARDSNYWYFDVW	13	NA	:::::::::0:-3:12:::::12:5:39:::	IGHM		>GS_17 4			CTACTGGTACTTCGATGTCTGGggcacagggaccacggtcaccgtctcctcag	NA
GS_18	CD19cre TCL1tg	9-12 months	1	red	0	8775	0.763641	V1-55	J1	TGTGCAAGAAGGGATTACTACGGTAGTAGCTGGTACTTCGATGTCTGG	CARRDYYGSSWYFDVW	16	NA	:::::::::0:0:9:13:-3:-4:29:29:-3:48:::	IGHM		>GS_18 1	caggtccaactgcagcagcctggggctgagcttgtgaagcctggggcttcagtgaagatgtcctgcaaggcttctggctacaccttcaccagctactggataacctgggtgaagcagaggcctggacaaggccttgagtggattggagatatttatcctggtagtggtagtactaactacaatgagaagttcaagagcaaggccacactgactgtagacacatcctccagcacagcctacatgcagctcagcagcctgacatctgaggactctgcggtctattacTGTGCAAGA	NA		NA	qvqlqqpgaelvkpgasvkmsckasgytftsywitwvkqrpgqglewigdiypgsgstnynekfkskatltvdtssstaymqlssltsedsavyyCAR	100
GS_18	CD19cre TCL1tg	9-12 months	2	blue	1	1367	0.118963	V1-34	J3	TCTGCCTACTATGGTAACTTTGCTTACTGG	SAYYGNFAYW	10	NA	:::::::::0:-4:5:5:-1:-3:18:18:-5:30:::	IGHM		>GS_18 2		NA		NA
GS_19	CD19cre IKk2ca TCL1tg	5-6 months	1	red	0	2363	0.347756	V11-2	J1	TGTATGAGATATAGTAACTACTGGTACTTCGATGTCTGG	CMRYSNYWYFDVW	13	NA	:::::::::0:2:13:::::12:5:39:::	IGHM		>GS_19 1	gaagtgcagctgttggagactggaggaggcttggtgcaacctggggggtcacggggactctcttgtgaaggctcagggttcacttttagtggcttctggatgagctgggttcgacagacacctgggaagaccctggagtggattggagacattaattctgatggcagtgcaataaactacgcaccatccataaaggatcgattcactatcttcagagacaatgacaagagcaccctgtacctgcagatgagcaatgtgcgatcggaggacacagccacgtatttcTGTATGAGATA		CTACTGGTACTTCGATGTCTGGggcacagggaccacggtcaccgtctcctcag	NA	evqlletggglvqpggsrglscegsgftfsgfwmswvrqtpgktlewigdinsdgsainyapsikdrftifrdndkstlylqmsnvrsedtatyfCMR_	100
GS_19	CD19cre IKk2ca TCL1tg	5-6 months	2	blue	1	2127	0.313024	V1-15	J4	TGTACAAGATACTATTACTATGCTATGGACTACTGG	CTRYYYYAMDYW	12	NA	:::::::::0:1:10:::::9:4:36:::	IGHM		>GS_19 2	caggttcaactgcagcagtctggggctgagctggtgaggcctggggcttcagtgacgctgtcctgcaaggcttcgggctacacatttactgactatgaaatgcactgggtgaagcagacacctgtgcatggcctggaatggattggagctattgatcctgaaactggtggtactgcctacaatcagaagttcaagggcaaggccatactgactgcagacaaatcctccagcacagcctacatggagctccgcagcctgacatctgaggactctgccgtctattacTGTACAAGA		ATTACTATGCTATGGACTACTGGggtcaaggaacctcagtcaccgtctcctcag	NA	qvqlqqsgaelvrpgasvtlsckasgytftdyemhwvkqtpvhglewigaidpetggtaynqkfkgkailtadkssstaymelrsltsedsavyyCTR	100
GS_19	CD19cre IKk2ca TCL1tg	5-6 months	3	green	2	859	0.126416	V12-3	J1	TGTGCAGGAGACTATGATGGTTACTGGTACTTCGATGTCTGG	CAGDYDGYWYFDVW	14	NA	:::::::::0:0:9:11:-1:-6:21:21:-1:42:::	IGHM		>GS_19 3	cagatgcagcttcaggagtcaggacctggcctggtgaaaccctcacagtcactcttccttacctgctctattactggtttccccatcaccagtggttactactggatctggatccgtcagtcacctgggaaacccctagaatggatggggtacatcactcatagtggggaaactttctacaacccatctctccagagccccatctccattactagagaaacgtcaaagaaccagttcttcctccaattgaactctgtgaccacagaggacacagccatgtattacTGTGCAGGA			NA	qmqlqesgpglvkpsqslfltcsitgfpitsgyywiwirqspgkplewmgyithsgetfynpslqspisitretsknqfflqlnsvttedtamyyCAG	100
GS_19	CD19cre IKk2ca TCL1tg	5-6 months	4	grey	3	416	0.061221	V6-3	J2	TGCACAGACTGGGGGGGCTACTGG	CTDWGGYW	8	NA	:::::::::0:-1:7:7:-3:-2:13:17:-10:24:::	IGHM		>GS_19 4				NA
GS_20	CD19cre IKk2ca TCL1tg	5-6 months	1	red	0	5378	0.392583	V11-2	J1	TGTATGAGATATAGTAACTACTGGTACTTCGATGTCTGG	CMRYSNYWYFDVW	13	NA	:::::::::0:2:13:::::12:5:39:::	IGHM		>GS_20 1	gaagtgcagctgttggagactggaggaggcttggtgcaacctggggggtcacggggactctcttgtgaaggctcagggttcacttttagtggcttctggatgagctgggttcgacagacacctgggaagaccctggagtggattggagacattaattctgatggcagtgcaataaactacgcaccatccataaaggatcgattcactatcttcagagacaatgacaagagcaccctgtacctgcagatgagcaatgtgcgatcggaggacacagccacgtatttcTGTATGAGATA	NA	CTACTGGTACTTCGATGTCTGGggcacagggaccacggtcaccgtctcctcag	NA	evqlletggglvqpggsrglscegsgftfsgfwmswvrqtpgktlewigdinsdgsainyapsikdrftifrdndkstlylqmsnvrsedtatyfCMR_	100
GS_20	CD19cre IKk2ca TCL1tg	5-6 months	2	blue	1	5126	0.374188	V7-3	J4	TGTGCAAGATATTACTACGGTAGTAGCTATGCTATGGACTACTGG	CARYYYGSSYAMDYW	15	NA	:::::::::0:-1:12:12:-5:-4:26:26:-4:45:::	IGHM		>GS_20 2		NA		NA
GS_20	CD19cre IKk2ca TCL1tg	5-6 months	3	grey	2	982	0.071684	V10-1	J2	TGTGTGAGCGGTAGTAGCTACTTTGACTACTGG	CVSGSSYFDYW	11	NA	:::::::::0:-1:8:::::10:5:33:::	IGHM		>GS_20 3		NA	AGCTACTTTGACTACTGGggccaaggcaccactctcacagtctcctcag	NA
GS_21	CD19cre IKk2ca TCL1tg	5-6 months	1	red	0	10130	0.384265	V12-3	J1	TGTGCAGGAGACAGCTCAGGCTACTGGTACTTCGATGTCTGG	CAGDSSGYWYFDVW	14	NA	:::::::::0:0:9:9:-1:-5:19:19:1:42:::	IGHM		>GS_21 1	cagatgcagcttcaggagtcaggacctggcctggtgaaaccctcacagtcactcttccttacctgctctattactggtttccccatcaccagtggttactactggatctggatccgtcagtcacctgggaaacccctagaatggatggggtacatcactcatagtggggaaactttctacaacccatctctccagagccccatctccattactagagaaacgtcaaagaaccagttcttcctccaattgaactctgtgaccacagaggacacagccatgtattacTGTGCAGGA		CTACTGGTACTTCGATGTCTGGggcacagggaccacggtcaccgtctcctcag	NA	qmqlqesgpglvkpsqslfltcsitgfpitsgyywiwirqspgkplewmgyithsgetfynpslqspisitretsknqfflqlnsvttedtamyyCAG	100
GS_21	CD19cre IKk2ca TCL1tg	5-6 months	2	blue	1	5179	0.196457	V12-3	J3	TGTGCAGGAGACAGATCGGGGTACTACGGTTTTGCTTACTGG	CAGDRSGYYGFAYW	14	NA	:::::::::0:0:9:21:-5:-9:30:30:-5:42:::	IGHM		>GS_21 2	cagatgcagcttcaggagtcaggacctggcctggtgaaaccctcacagtcactcttccttacctgctctattactggtttccccatcaccagtggttactactggatctggatccgtcagtcacctgggaaacccctagaatggatggggtacatcactcatagtggggaaactttctacaacccatctctccagagccccatctccattactagagaaacgtcaaagaaccagttcttcctccaattgaactctgtgaccacagaggacacagccatgtattacTGTGCAGGA			NA	qmqlqesgpglvkpsqslfltcsitgfpitsgyywiwirqspgkplewmgyithsgetfynpslqspisitretsknqfflqlnsvttedtamyyCAG	100
GS_21	CD19cre IKk2ca TCL1tg	5-6 months	3	green	2	4575	0.173545	V1-55	J1	TGTGCAAGAAGGGACTACGGTAGTAGCTACTGGTACTTCGATGTCTGG	CARRDYGSSYWYFDVW	16	NA	:::::::::0:0:9:13:-6:-9:21:21:5:48:::	IGHM		>GS_21 3	caggtccaactgcagcagcctggggctgagcttgtgaagcctggggcttcagtgaagatgtcctgcaaggcttctggctacaccttcaccagctactggataacctgggtgaagcagaggcctggacaaggccttgagtggattggagatatttatcctggtagtggtagtactaactacaatgagaagttcaagagcaaggccacactgactgtagacacatcctccagcacagcctacatgcagctcagcagcctgacatctgaggactctgcggtctattacTGTGCAAGA		CTACTGGTACTTCGATGTCTGGggcacagggaccacggtcaccgtctcctcag	NA	qvqlqqpgaelvkpgasvkmsckasgytftsywitwvkqrpgqglewigdiypgsgstnynekfkskatltvdtssstaymqlssltsedsavyyCAR	100
GS_21	CD19cre IKk2ca TCL1tg	5-6 months	4	grey	4	1814	0.068811	V11-2	J1	TGTATGAGATATGGTAACTACTGGTACTTCGATGTCTGG	CMRYGNYWYFDVW	13	NA	:::::::::0:1:12:::::13:4:39:::	IGHM		>GS_21 4	gaagtgcagctgttggagactggaggaggcttggtgcaacctggggggtcacggggactctcttgtgaaggctcagggttcacttttagtggcttctggatgagctgggttcgacagacacctgggaagaccctggagtggattggagacattaattctgatggcagtgcaataaactacgcaccatccataaaggatcgattcactatcttcagagacaatgacaagagcaccctgtacctgcagatgagcaatgtgcgatcggaggacacagccacgtatttcTGTATGAGATA		CTACTGGTACTTCGATGTCTGGggcacagggaccacggtcaccgtctcctcag	NA	evqlletggglvqpggsrglscegsgftfsgfwmswvrqtpgktlewigdinsdgsainyapsikdrftifrdndkstlylqmsnvrsedtatyfCMR_	100
GS_21	CD19cre IKk2ca TCL1tg	5-6 months	5	grey	5	1662	0.063045	V13-2	J2	TGTAGTAGATCTAGGGACTACGGTAGTAGCTACTTTGACTACTGG	CSRSRDYGSSYFDYW	15	NA	:::::::::0:4:13:16:-6:-11:22:22:5:45:::	IGHM		>GS_21 5	caggtgcagcttgtagagaccgggggaggcttggtgaggcctggaaattctctgaaactctcctgtgttacctcgggattcactttcagtaactaccggatgcactggcttcgccagcctccagggaagaggctggagtggattgctgtaattacagtcaaatctgataattatggagcaaattatgcagagtctgtgaaaggcagattcgccatttcaagagatgattcaaaaagcagtgtctacctagagatgaacagattaagagaggaagacactgccacttattttTGTAGTAGA		AGCTACTTTGACTACTGGggccaaggcaccactctcacagtctcctcag	NA	qvqlvetggglvrpgnslklscvtsgftfsnyrmhwlrqppgkrlewiavitvksdnyganyaesvkgrfaisrddskssvylemnrlreedtatyfCSR	100
GS_22	CD19cre IKk2ca/ca TCL1tg	3-4 months	1	blue	0	6298	0.165606	V13-2	J4	TGTAGTAGTAGTAGCTATGCTATGGACTACTGG	CSSSSYAMDYW	11	NA	:::::::::0:-1:8:::::2:7:33:::	IGHM		>GS_22 1			AGTAGCTATGCTATGGACTACTGGggtcaaggaacctcagtcaccgtctcctcag	NA
GS_22	CD19cre IKk2ca/ca TCL1tg	3-4 months	2	red	1	5310	0.139627	V1-52	J1	TGTGCAAGCTACTATAGTAACTACTGGTACTTCGATGTCTGG	CASYYSNYWYFDVW	14	NA	:::::::::0:-1:8:8:-1:-9:15:15:5:42:::	IGHM		>GS_22 2			CTACTGGTACTTCGATGTCTGGggcacagggaccacggtcaccgtctcctcag	NA
GS_22	CD19cre IKk2ca/ca TCL1tg	3-4 months	3	green	2	4529	0.11909	V11-2	J1	TGTATGAGATATGGTAACTACTGGTACTTCGATGTCTGG	CMRYGNYWYFDVW	13	NA	:::::::::0:1:12:::::13:4:39:::	IGHM		>GS_22 3	gaagtgcagctgttggagactggaggaggcttggtgcaacctggggggtcacggggactctcttgtgaaggctcagggttcacttttagtggcttctggatgagctgggttcgacagacacctgggaagaccctggagtggattggagacattaattctgatggcagtgcaataaactacgcaccatccataaaggatcgattcactatcttcagagacaatgacaagagcaccctgtacctgcagatgagcaatgtgcgatcggaggacacagccacgtatttcTGTATGAGATA		CTACTGGTACTTCGATGTCTGGggcacagggaccacggtcaccgtctcctcag	NA	evqlletggglvqpggsrglscegsgftfsgfwmswvrqtpgktlewigdinsdgsainyapsikdrftifrdndkstlylqmsnvrsedtatyfCMR_	100
GS_22	CD19cre IKk2ca/ca TCL1tg	3-4 months	4	violet	3	3733	0.098159	V13-2	J4	TGTGGTAATGCTATGGACTACTGG	CGNAMDYW	8	NA	:::::::::0:-2:7:::::7:-6:24:::	IGHM		>GS_22 4				NA
GS_22	CD19cre IKk2ca/ca TCL1tg	3-4 months	5	red	4	3684	0.096871	V1-9	J1	TGTGCAAGATACTATAGTAACTACTGGTACTTCGATGTCTGG	CARYYSNYWYFDVW	14	NA	:::::::::0:1:10:10:11:-23:15:15:5:42:::	IGHM		>GS_22 5	caggttcagctgcagcagtctggagctgagctgatgaagcctggggcctcagtgaagctttcctgcaaggctactggctacacattcactggctactggatagagtgggtaaagcagaggcctggacatggccttgagtggattggagagattttacctggaagtggtagtactaactacaatgagaagttcaagggcaaggccacattcactgcagatacatcctccaacacagcctacatgcaactcagcagcctgacaactgaggactctgccatctattacTGTGCAAGA		CTACTGGTACTTCGATGTCTGGggcacagggaccacggtcaccgtctcctcag	NA	qvqlqqsgaelmkpgasvklsckatgytftgywiewvkqrpghglewigeilpgsgstnynekfkgkatftadtssntaymqlsslttedsaiyyCAR	100
GS_22	CD19cre IKk2ca/ca TCL1tg	3-4 months	6	grey	5	3410	0.089666	V7-3	J4	TGTGCAAGATATTACTACGGTAGTAGCTATGCTATGGACTACTGG	CARYYYGSSYAMDYW	15	NA	:::::::::0:-1:12:12:-5:-4:26:26:-4:45:::	IGHM		>GS_22 6				NA
GS_23	CD19cre IKk2ca/ca TCL1tg	3-4 months	1	red	0	6228	0.223948	V12-3	J1	TGTGCAGGAGACCAACTGGGCTACTGGTACTTCGATGTCTGG	CAGDQLGYWYFDVW	14	NA	:::::::::0:0:9:13:-2:-3:19:19:1:42:::	IGHM		>GS_23 1	cagatgcagcttcaggagtcaggacctggcctggtgaaaccctcacagtcactcttccttacctgctctattactggtttccccatcaccagtggttactactggatctggatccgtcagtcacctgggaaacccctagaatggatggggtacatcactcatagtggggaaactttctacaacccatctctccagagccccatctccattactagagaaacgtcaaagaaccagttcttcctccaattgaactctgtgaccacagaggacacagccatgtattacTGTGCAGGA		CTACTGGTACTTCGATGTCTGGggcacagggaccacggtcaccgtctcctcag	NA	qmqlqesgpglvkpsqslfltcsitgfpitsgyywiwirqspgkplewmgyithsgetfynpslqspisitretsknqfflqlnsvttedtamyyCAG	100
GS_23	CD19cre IKk2ca/ca TCL1tg	3-4 months	2	green	1	5109	0.183711	V11-2	J1	TGTATGAGATATGGTAACTACTGGTACTTCGATGTCTGG	CMRYGNYWYFDVW	13	NA	:::::::::0:1:12:::::13:4:39:::	IGHM		>GS_23 2	gaagtgcagctgttggagactggaggaggcttggtgcaacctggggggtcacggggactctcttgtgaaggctcagggttcacttttagtggcttctggatgagctgggttcgacagacacctgggaagaccctggagtggattggagacattaattctgatggcagtgcaataaactacgcaccatccataaaggatcgattcactatcttcagagacaatgacaagagcaccctgtacctgcagatgagcaatgtgcgatcggaggacacagccacgtatttcTGTATGAGATA		CTACTGGTACTTCGATGTCTGGggcacagggaccacggtcaccgtctcctcag	NA	evqlletggglvqpggsrglscegsgftfsgfwmswvrqtpgktlewigdinsdgsainyapsikdrftifrdndkstlylqmsnvrsedtatyfCMR_	100
GS_23	CD19cre IKk2ca/ca TCL1tg	3-4 months	3	blue	2	4364	0.156922	V1-12	J2	TGTGCATATGGTAACTACTACTTTGACTACTGG	CAYGNYYFDYW	11	NA	:::::::::0:-3:6:6:-5:-3:15:15:1:33:::	IGHM		>GS_23 3			ACTACTTTGACTACTGGggccaaggcaccactctcacagtctcctcag	NA
GS_23	CD19cre IKk2ca/ca TCL1tg	3-4 months	4	grey	3	1426	0.051277	V13-2	J3	TGTACTGGGTTTGCTTACTGG	CTGFAYW	7	NA	:::::::::0:-5:4:::::7:-3:21:::	IGHM		>GS_23 4				NA
GS_24	CD19cre IKk2ca/ca TCL1tg	3-4 months	1	red	0	2561	0.131434	V12-3	J1	TGTGCAGGAGACAGAGATGGTTACTGGTACTTCGATGTCTGG	CAGDRDGYWYFDVW	14	NA	:::::::::0:0:9:15:-5:-6:21:21:-1:42:::	IGHM		>GS_24 1	cagatgcagcttcaggagtcaggacctggcctggtgaaaccctcacagtcactcttccttacctgctctattactggtttccccatcaccagtggttactactggatctggatccgtcagtcacctgggaaacccctagaatggatggggtacatcactcatagtggggaaactttctacaacccatctctccagagccccatctccattactagagaaacgtcaaagaaccagttcttcctccaattgaactctgtgaccacagaggacacagccatgtattacTGTGCAGGA			NA	qmqlqesgpglvkpsqslfltcsitgfpitsgyywiwirqspgkplewmgyithsgetfynpslqspisitretsknqfflqlnsvttedtamyyCAG	100
GS_24	CD19cre IKk2ca/ca TCL1tg	3-4 months	2	green	1	2021	0.103721	V7-1	J1	TGTGCAAGAGATAACTGGGACTGGTACTTCGATGTCTGG	CARDNWDWYFDVW	13	NA	:::::::::0:-3:12:12:-2:-2:19:19:-2:39:::	IGHM		>GS_24 2				NA
GS_24	CD19cre IKk2ca/ca TCL1tg	3-4 months	3	blue	2	1464	0.075135	V1-69	J3	TGTGCAACTGGGACGTTTGCTTACTGG	CATGTFAYW	9	NA	:::::::::0:-2:7:7:-4:0:14:14:-4:27:::	IGHM		>GS_24 3				NA
GS_24	CD19cre IKk2ca/ca TCL1tg	3-4 months	4	grey	3	1410	0.072363	V11-2	J1	TGTATGAGATATGGTAACTACTGGTACTTCGATGTCTGG	CMRYGNYWYFDVW	13	NA	:::::::::0:1:12:::::13:4:39:::	IGHM		>GS_24 4	gaagtgcagctgttggagactggaggaggcttggtgcaacctggggggtcacggggactctcttgtgaaggctcagggttcacttttagtggcttctggatgagctgggttcgacagacacctgggaagaccctggagtggattggagacattaattctgatggcagtgcaataaactacgcaccatccataaaggatcgattcactatcttcagagacaatgacaagagcaccctgtacctgcagatgagcaatgtgcgatcggaggacacagccacgtatttcTGTATGAGATA		CTACTGGTACTTCGATGTCTGGggcacagggaccacggtcaccgtctcctcag	NA	evqlletggglvqpggsrglscegsgftfsgfwmswvrqtpgktlewigdinsdgsainyapsikdrftifrdndkstlylqmsnvrsedtatyfCMR_	100
GS_25	CD19cre IKk2ca/ca TCL1tg	3-4 months	1	red	0	32306	0.645965	V11-2	J1	TGTATGAGATACGGTAGTAGCTACTGGTACTTCGATGTCTGG	CMRYGSSYWYFDVW	14	NA	:::::::::0:0:11:::::15:5:42:::	IGHM		>GS_25 1	gaagtgcagctgttggagactggaggaggcttggtgcaacctggggggtcacggggactctcttgtgaaggctcagggttcacttttagtggcttctggatgagctgggttcgacagacacctgggaagaccctggagtggattggagacattaattctgatggcagtgcaataaactacgcaccatccataaaggatcgattcactatcttcagagacaatgacaagagcaccctgtacctgcagatgagcaatgtgcgatcggaggacacagccacgtatttcTGTATGAGATA		CTACTGGTACTTCGATGTCTGGggcacagggaccacggtcaccgtctcctcag	NA	evqlletggglvqpggsrglscegsgftfsgfwmswvrqtpgktlewigdinsdgsainyapsikdrftifrdndkstlylqmsnvrsedtatyfCMR_	100
GS_25	CD19cre IKk2ca/ca TCL1tg	3-4 months	2	blue	1	3335	0.066684	V12-3	J1	TGTGCAGGAGACTATGATGGTTACTGGTACTTCGATGTCTGG	CAGDYDGYWYFDVW	14	NA	:::::::::0:0:9:11:-1:-6:21:21:-1:42:::	IGHM		>GS_25 2	cagatgcagcttcaggagtcaggacctggcctggtgaaaccctcacagtcactcttccttacctgctctattactggtttccccatcaccagtggttactactggatctggatccgtcagtcacctgggaaacccctagaatggatggggtacatcactcatagtggggaaactttctacaacccatctctccagagccccatctccattactagagaaacgtcaaagaaccagttcttcctccaattgaactctgtgaccacagaggacacagccatgtattacTGTGCAGGA			NA	qmqlqesgpglvkpsqslfltcsitgfpitsgyywiwirqspgkplewmgyithsgetfynpslqspisitretsknqfflqlnsvttedtamyyCAG	100
GS_25	CD19cre IKk2ca/ca TCL1tg	3-4 months	3	grey	2	3312	0.066224	V11-2	J1	TGTATGAGATATGGTAACTACTGGTACTTCGATGTCTGG	CMRYGNYWYFDVW	13	NA	:::::::::0:1:12:::::13:4:39:::	IGHM		>GS_25 3	gaagtgcagctgttggagactggaggaggcttggtgcaacctggggggtcacggggactctcttgtgaaggctcagggttcacttttagtggcttctggatgagctgggttcgacagacacctgggaagaccctggagtggattggagacattaattctgatggcagtgcaataaactacgcaccatccataaaggatcgattcactatcttcagagacaatgacaagagcaccctgtacctgcagatgagcaatgtgcgatcggaggacacagccacgtatttcTGTATGAGATA		CTACTGGTACTTCGATGTCTGGggcacagggaccacggtcaccgtctcctcag	NA	evqlletggglvqpggsrglscegsgftfsgfwmswvrqtpgktlewigdinsdgsainyapsikdrftifrdndkstlylqmsnvrsedtatyfCMR_	100
GS_26	CD19cre IKk2ca/ca TCL1tg	3-4 months	1	red	0	11521	0.56434	V12-3	J2	TGTGCAGGAGGTTCTTATTACTACGGTTTTGACTACTGG	CAGGSYYYGFDYW	13	NA	:::::::::0:0:9:14:-1:-9:27:27:-5:39:::	IGHM		>GS_26 1	cagatgcagcttcaggagtcaggacctggcctggtgaaaccctcacagtcactcttccttacctgctctattactggtttccccatcaccagtggttactactggatctggatccgtcagtcacctgggaaacccctagaatggatggggtacatcactcatagtggggaaactttctacaacccatctctccagagccccatctccattactagagaaacgtcaaagaaccagttcttcctccaattgaactctgtgaccacagaggacacagccatgtattacTGTGCAGGA			NA	qmqlqesgpglvkpsqslfltcsitgfpitsgyywiwirqspgkplewmgyithsgetfynpslqspisitretsknqfflqlnsvttedtamyyCAG	100

## Sheet: S5D
Supplementary Table S5D Overview of identified CDR3 sequences that have been published already
					Lymphoproliferations
				Genotype	CD19cre IKK2ca	CD19cre IKK2ca/ca	CD19cre TCL1tg	CD19cre IKK2ca TCL1tg	CD19cre IKK2ca/ca TCL1tg	Total
				Samples	4	5	8	11	7	35
				Clonotypes	13	18	17	29	27	104
aaSeqCDR3	Reference	Cell type	Comment	Antigen
CMRYGNYWYFDVW	1) Kil et al 2012	TCL1-CLL	Second most frequent sterotyped BCR		4	5	3	3	4	19
	2) Zaborsky et al 2019	TCL1-CLL	Highly recurrently found
	3) Prohaska et al 2018	FACS-purified B1a cells	1st most frequent BCR in PerC, 2nd most frequent BCR in Spl	oxidized LDL
CAGDSDGYWYFDVW	4) This study	TCL1-CLL	Stereotyped BCR		3	3	1	2		9
CMRYSNYWYFDVW	1) Kil et al 2012	TCL1-CLL	Most frequent Stereotyped BCR				1	4		5
	2) Zaborsky et al 2019	TCL1-CLL	Highly recurrently found
	3) Prohaska et al 2018	B1a	2nd most frequent BCR in PerC, 1st most frequent BCR in Spl	oxidized LDL
	4) This study	TCL1-CLL	Stereotyped BCR
	5) Singh et al 2017	monoclonal mouse cell lines EMC2, EMC4 and EMC6	TCL1tg origin, specific for Phosphatidyllcholine	Phosphatidyllcholine
	6) Mogilenko et al 2021	peritoneal Zbtb32+ B-1 cells	Clonal features, characterisctic BCR
CAGDYDGYWYFDVW	7) Daklis	TCL1-CLL	Stereotyped BCR				1	1	2	4
	4) This study	TCL1-CLL	Stereotyped BCR
CASPNWDWYFDVW	8) Vieira et al 2023	influenza A/H1N1 specific Plasma Cell	LN after Influenza infection, day 56	influenza A/H1N1	4	2				6
	4) This study
CMRYGSSYWYFDVW	1) Kil et al 2012	TCL1-CLL	Stereotyped BCR			1	1		1	3
CARRDYGSSYWYFDVW	9) Yang et al 2021	PerC Breg	Major Clonotype in PerC			1		1		2
CARHYYGSSYYFDYW	10) Endo et al 2021	Identified in ACR+ B cells clones carrying the IGHV5-6-1, IGHV5-9-3, and IGHV5-12-2 segments of PerC B1a (BALB/c mice) origin	2nd most frequent BCR, identified in 3 clones	Acrolein acrolein-treated Nα -acetyl-L-lysine (acrNAK)				1		1
CARLTGAYW	10) Endo et al 2021	Identified in ACR+ B cells clones carrying the IGHV5-6-1 segment of PerC B1a (BALB/c mice) origin	1st most frequent BCR	Acrolein acrolein-treated Nα -acetyl-L-lysine (acrNAK)					1	1
Reference
1) Kil, L.P., Bruijn, M.J. de, Hulst, J.A. van, Langerak, A.W., Yuvaraj, S., and Hendriks, R.W. (2012). Bruton’s tyrosine kinase mediated signaling enhances leukemogenesis in a mouse model for chronic lymphocytic leukemia. Am. J. Blood Res. 3, 71–83.
2) Zaborsky, N., Gassner, F.J., Höpner, J.P., Schubert, M., Hebenstreit, D., Stark, R., Asslaber, D., Steiner, M., Geisberger, R., Greil, R., and Egle, A. (2019). Exome sequencing of the TCL1 mouse model for CLL reveals genetic heterogeneity and dynamics during disease development. Leukemia 33, 957–968.
3) T. A. Prohaska, X. Que, C. J. Diehl, S. Hendrikx, M. W. Chang, K. Jepsen, C. K. Glass, C. Benner, J. L. Witztum, Massively Parallel Sequencing of Peritoneal and Splenic B Cell Repertoires Highlights Unique Properties of B-1 Cell Antibodies. J. Immunol. 200, 1702–1717 (2018).
4) Soberon 2018, PhD thesis, this study
5) S. P. Singh, S. Y. Pillai, M. J. W. de Bruijn, R. Stadhouders, O. B. J. Corneth, H. J. van den Ham, A. Muggen, W. van IJcken, E. Slinger, A. Kuil, M. Spaargaren, A. P. Kater, A. W. Langerak, R. W. Hendriks, Cell lines generated from a chronic lymphocytic leukemia mouse model exhibit constitutive Btk and Akt signaling. Oncotarget 8, 71981–71995 (2017).
6) D. A. Mogilenko, O. Shpynov, P. S. Andhey, L. Arthur, A. Swain, E. Esaulova, S. Brioschi, I. Shchukina, M. Kerndl, M. Bambouskova, Z. Yao, A. Laha, K. Zaitsev, S. Burdess, S. Gillfilan, S. A. Stewart, M. Colonna, M. N. Artyomov, Comprehensive Profiling of an Aging Immune System Reveals Clonal GZMK+ CD8+ T Cells as Conserved Hallmark of Inflammaging. Immunity 54, 99-115.e12 (2021).
phosphatidylcholine, oxidized LDL BCR: https://www.oncotarget.com/article/18234/text/
7) Dagklis 2010, PhD thesis (http://ikee.lib.auth.gr/record/114407/files/DAGLIS.pdf)
8) M. C. Vieira, A.-K. E. Palm, C. T. Stamper, M. E. Tepora, K. D. Nguyen, T. D. Pham, S. D. Boyd, P. C. Wilson, S. Cobey, Germline-encoded specificities and the predictability of the B cell response. bioRxiv, 2022.09.16.508315. Now published in PLOS Pathogens doi: 10.1371/journal.ppat.1011603
9)Yang, S.-Y., Long, J., Huang, M.-X., Luo, P.-Y., Bian, Z.-H., Xu, Y.-F., Wang, C.-B., Yang, S.-H., Li, L., Selmi, C., Gershwin, M.E., Zhao, Z.-B., and Lian, Z.-X. (2021). Characterization of Organ-Specific Regulatory B Cells Using Single-Cell RNA Sequencing. Front. Immunol. 12, 711980.
10) R. Endo, K. Uchiyama, S.-Y. Lim, M. Itakura, T. Adachi, K. Uchida, Recognition of acrolein-specific epitopes by B cell receptors triggers an innate immune response. J. Biol. Chem. 296, 100648 (2021).
