# Supplementary material for: Strong constitutive NF-κB signaling in B cells drives SLL/CLL-like lymphomagenesis and overcomes microenvironmental dependencies
Source: Leukemia. 2026 Jan 16;40(3):522–39. doi: 10.1038/s41375-025-02844-8 (PMC12960208; doi:10.1038/s41375-025-02844-8)
Supplement: Supplementary file 8 — Supplemental Table 6 DEG lymphomas [file 41375_2025_2844_MOESM8_ESM.xlsx]

## Sheet: S6A
Suppl Table S6A Differentially expressed genes in lymphomas of IKK2ca/ca TCL1 mice compared to TCL1 mice
Genes upregulated in lymphomas of IKK2ca/ca TCL1 mice compared to TCL1 mice (FC >1.5, padj <0.05)
Gene	baseMean	log2FoldChange	lfcSE	stat	pvalue	padj	diffexpressed
Lmo7	17.8193	3.26855	0.40658	8.03915	9.04657e-16	5.46775e-12	UP
Mndal	130.941	1.68061	0.251915	6.67135	2.53467e-11	5.10652e-08	UP
Myl4	26.8948	2.18358	0.340433	6.41412	1.41638e-10	2.14015e-07	UP
Zap70	6.59212	3.59484	0.564967	6.36293	1.97944e-10	2.65861e-07	UP
Ighv13-2	5.65971	5.929	0.963675	6.15249	7.62773e-10	8.38218e-07	UP
Tank	75.9836	1.11605	0.185716	6.00946	1.86145e-09	1.8751e-06	UP
Emb	37.1126	2.07364	0.357342	5.80295	6.51571e-09	5.25079e-06	UP
Cd40	75.5709	1.59332	0.27525	5.78863	7.09613e-09	5.36113e-06	UP
Ifi203	63.4303	1.34764	0.236293	5.70326	1.1754e-08	8.35776e-06	UP
Gm11998	38.7075	1.26105	0.232288	5.42884	5.67219e-08	2.9811e-05	UP
Nav2	5.39921	2.8747	0.530302	5.42087	5.93085e-08	2.98717e-05	UP
Ikbke	14.4113	1.49401	0.276381	5.4056	6.45908e-08	3.00298e-05	UP
Limd2	760.756	1.33167	0.248272	5.36378	8.15001e-08	3.51848e-05	UP
Grap	428.65	1.43049	0.268398	5.32975	9.83476e-08	4.0994e-05	UP
Parp8	4.81467	2.97153	0.576911	5.15076	2.59434e-07	9.22363e-05	UP
Klhl13	5.36426	4.87906	0.957311	5.09663	3.45754e-07	0.000107115	UP
Ahcyl2	27.1698	2.32005	0.455634	5.09192	3.54451e-07	0.000107115	UP
Lta	21.0598	2.36099	0.475992	4.96015	7.04376e-07	0.000202726	UP
Gm11707	18.6781	1.50915	0.306995	4.91587	8.83893e-07	0.00022584	UP
Kcns1	9.52635	2.61728	0.533908	4.90212	9.48092e-07	0.00022584	UP
Dennd2d	34.3097	0.996405	0.203765	4.88997	1.00849e-06	0.000230012	UP
Gm31718	33.6747	1.62286	0.333387	4.86779	1.12851e-06	0.000251286	UP
Trim7	27.9565	1.16406	0.239261	4.86521	1.14334e-06	0.000251286	UP
Relb	133.998	1.26831	0.261278	4.85426	1.20838e-06	0.000260838	UP
Lck	89.8455	1.70505	0.355829	4.79176	1.65321e-06	0.000322323	UP
Ift140	45.464	1.37198	0.291782	4.70206	2.57548e-06	0.000478961	UP
Smc4	138.44	0.900018	0.192709	4.67034	3.00704e-06	0.000534545	UP
Ncan	5.28814	2.48711	0.533001	4.66625	3.06754e-06	0.000537397	UP
Nedd4	65.396	1.42514	0.306489	4.64989	3.32106e-06	0.000568174	UP
Madcam1	2.90355	4.63861	0.997789	4.64889	3.33722e-06	0.000568174	UP
Il4i1	165.901	1.6383	0.355047	4.61433	3.94365e-06	0.000637345	UP
Marcksl1	163.388	1.01809	0.220663	4.61376	3.95441e-06	0.000637345	UP
Lyst	45.3858	1.90291	0.412769	4.6101	4.02469e-06	0.000640137	UP
Ltb	182.162	1.46554	0.318595	4.60001	4.2247e-06	0.000656017	UP
Pex16	44.4031	0.847608	0.184848	4.58543	4.53044e-06	0.000667853	UP
Fcer2a	10.927	2.30461	0.505444	4.55959	5.12539e-06	0.000712135	UP
Tfe3	31.5093	0.983767	0.216756	4.53859	5.66307e-06	0.000767191	UP
Pik3r4	28.4506	1.34754	0.300232	4.48833	7.1782e-06	0.000933012	UP
2510002D24Rik	88.942	0.609571	0.136273	4.47316	7.70711e-06	0.000972547	UP
Gbp2	151.764	1.26891	0.287224	4.41784	9.96909e-06	0.00119313	UP
Arrdc4	2.72586	4.12116	0.939132	4.38827	1.14257e-05	0.00135398	UP
Pigr	23.2389	1.79274	0.408922	4.38405	1.16491e-05	0.00135398	UP
Rps23-ps2	40.0815	0.746788	0.171398	4.35703	1.31836e-05	0.00150852	UP
Ighv1-9	4.64301	4.75929	1.10196	4.31893	1.56787e-05	0.00172182	UP
Cd27	5.46944	2.32755	0.546281	4.26072	2.03767e-05	0.00205262	UP
Wnt16	5.06562	3.61949	0.854829	4.23417	2.29394e-05	0.00223622	UP
Gm9922	8.36128	2.32156	0.548721	4.23085	2.32806e-05	0.00225133	UP
Xaf1	24.5525	0.890796	0.211244	4.2169	2.47681e-05	0.00235746	UP
Lpcat1	57.9718	0.957675	0.227251	4.21417	2.50693e-05	0.00236724	UP
Wls	42.9733	2.05861	0.49299	4.17576	2.96996e-05	0.00269932	UP
AW112010	150.127	1.29567	0.312449	4.14682	3.37118e-05	0.00299639	UP
Ddx24	170.281	0.59842	0.145093	4.12439	3.71721e-05	0.00325606	UP
4930426D05Rik	13.9553	1.50004	0.364246	4.11821	3.81821e-05	0.00332047	UP
Iglc1	1815.9	1.52409	0.370395	4.11478	3.87549e-05	0.00334621	UP
Immp2l	38.9265	1.00563	0.244699	4.10964	3.96269e-05	0.00339724	UP
Insl6	35.6025	0.98375	0.240099	4.09727	4.18059e-05	0.00353392	UP
Ccdc17	17.4139	1.06631	0.260699	4.09019	4.31011e-05	0.00359315	UP
D630008O14Rik	6.71571	2.06305	0.512256	4.02739	5.63995e-05	0.00448524	UP
Casp6	53.607	1.003	0.249225	4.02449	5.70991e-05	0.0045112	UP
Med11	78.7178	0.885986	0.221627	3.99764	6.3977e-05	0.00491071	UP
Rara	45.1685	0.932329	0.234434	3.97693	6.98096e-05	0.005209	UP
Fhit	22.8306	1.33687	0.339927	3.93281	8.39583e-05	0.00607325	UP
H2-K2	72.8395	0.769926	0.195978	3.92862	8.54336e-05	0.00608661	UP
Cfp	471.811	1.46653	0.374943	3.91134	9.1784e-05	0.00645049	UP
Nub1	91.6866	0.614982	0.157299	3.90965	9.24316e-05	0.00645846	UP
Mef2b	106.346	1.41051	0.3622	3.89429	9.84864e-05	0.00676423	UP
Egr2	9.54908	1.54624	0.397231	3.89256	9.91914e-05	0.00677416	UP
Fam92a	13.0685	1.82578	0.471551	3.87185	0.00010801	0.00717379	UP
Stat4	9.20737	2.15057	0.555763	3.86958	0.000109022	0.00718659	UP
Acbd4	46.0455	0.854916	0.221055	3.86743	0.000109987	0.00718659	UP
Stat1	142.79	0.929452	0.244311	3.80438	0.000142158	0.00885777	UP
Cep63	43.2162	0.740125	0.196068	3.77484	0.000160109	0.00977475	UP
Helz2	11.4038	1.18485	0.316584	3.74262	0.000182108	0.0107382	UP
Tnf	22.5353	1.42244	0.382826	3.71564	0.000202688	0.011557	UP
Trpm5	9.95096	1.97651	0.532977	3.70843	0.000208546	0.0117367	UP
Rel	83.0351	1.06053	0.286427	3.70262	0.000213385	0.0117584	UP
Igkv6-32	21.9743	3.69796	1.00138	3.69285	0.000221757	0.0120748	UP
2410006H16Rik	580.71	0.760713	0.206902	3.67668	0.000236292	0.0126385	UP
Sell	109.008	1.55336	0.426702	3.64038	0.000272234	0.0142959	UP
Cr2	16.8269	1.46747	0.403176	3.63976	0.000272892	0.0142959	UP
Arf2	21.7381	1.29138	0.357362	3.61365	0.00030192	0.0153992	UP
Cdh17	17.1511	1.63142	0.453351	3.59857	0.000319973	0.0160491	UP
Dalrd3	38.7905	0.613509	0.172296	3.5608	0.000369732	0.0180146	UP
Cybb	272.576	0.736774	0.207029	3.55879	0.000372572	0.0180146	UP
Nfkbia	896.158	1.23206	0.347577	3.54472	0.00039303	0.018611	UP
Nmd3	49.4276	0.581768	0.164228	3.54245	0.000396434	0.018611	UP
Fam241b	7.76098	1.98351	0.56001	3.54192	0.000397223	0.018611	UP
Rtp4	5.10645	2.53247	0.716636	3.53383	0.000409587	0.0190426	UP
Gmip	54.9289	0.599747	0.17165	3.49401	0.000475818	0.0214449	UP
Lynx1	35.9227	0.881248	0.25426	3.46593	0.000528408	0.0232705	UP
BC049352	9.45362	3.77746	1.1056	3.41667	0.000633932	0.0266075	UP
Sdhaf1	49.9739	0.655205	0.192597	3.40196	0.00066905	0.0276901	UP
Optn	37.3125	0.645583	0.189994	3.39792	0.000679008	0.0276901	UP
Shisa5	888.859	0.707885	0.208418	3.39646	0.000682631	0.0276901	UP
Hemk1	10.7537	1.01472	0.298934	3.39448	0.000687599	0.0277983	UP
Hcst	50.9166	0.803101	0.236733	3.39243	0.000692752	0.0279133	UP
Izumo1r	11.6505	1.98768	0.586277	3.39034	0.000698053	0.0280334	UP
Tnfaip3	53.8092	1.48746	0.438952	3.38866	0.000702344	0.0281124	UP
Matk	47.7115	1.15672	0.343391	3.36851	0.000755744	0.0298543	UP
Cep162	7.96046	1.19691	0.356501	3.3574	0.000786791	0.0301928	UP
Platr27	5.97189	1.84407	0.550072	3.35243	0.000801066	0.0304506	UP
Ifi27	249.573	0.921244	0.275507	3.34381	0.000826357	0.0311184	UP
Vps72	33.0005	0.60328	0.180515	3.34199	0.000831812	0.0312265	UP
Zfp36l1	218.125	0.758986	0.227407	3.33756	0.000845169	0.0314351	UP
Slc25a42	3.92922	2.21949	0.666288	3.33113	0.000864927	0.0318726	UP
Gm43916	13.7978	1.39172	0.421957	3.29827	0.000972839	0.0348952	UP
Spdl1	9.31427	1.20729	0.368092	3.27986	0.00103859	0.0368166	UP
Sfr1	203.302	0.784353	0.239578	3.2739	0.00106075	0.0373089	UP
Irak1bp1	9.72192	1.69958	0.519171	3.27363	0.00106174	0.0373089	UP
Nfatc1	337.02	0.6147	0.190303	3.23011	0.00123742	0.0426154	UP
Rapgef1	85.1839	0.841266	0.261035	3.2228	0.00126942	0.0434696	UP
Mettl22	17.1418	0.852902	0.264935	3.21929	0.00128509	0.0437132	UP
Usp3	35.7529	0.667337	0.207944	3.20921	0.001331	0.0445058	UP
Pop5	99.207	0.681533	0.212685	3.20442	0.00135334	0.0449429	UP
Nfkbie	52.5653	0.73734	0.231536	3.18456	0.00144974	0.0470859	UP
Tnip1	77.9212	0.701287	0.220536	3.17992	0.00147315	0.0474802	UP
Fcrl5	291.026	1.06865	0.336221	3.17842	0.00148081	0.0474802	UP
Il21r	27.581	1.16669	0.367931	3.17095	0.0015194	0.0480698	UP
Uchl3	179.482	0.662001	0.208879	3.1693	0.00152806	0.0481022	UP
Upf3b	65.4388	0.610455	0.192916	3.16436	0.00155427	0.0485478	UP
Genes downregulated in lymphomas of IKK2ca/ca TCL1 mice compared to TCL1 mice (FC <-1.5, padj <0.05)
Gene	baseMean	log2FoldChange	lfcSE	stat	pvalue	padj	diffexpressed
Cyhr1	34.1628	-0.621074	0.196964	-3.15324	0.00161472	0.0492896	DOWN
Gucd1	57.065	-0.66182	0.209857	-3.15367	0.0016123	0.0492896	DOWN
Trim40	11.072	-1.48848	0.471307	-3.15821	0.00158744	0.0488268	DOWN
Lnx2	23.4905	-0.916699	0.290149	-3.15941	0.00158087	0.048749	DOWN
Sqle	22.9841	-1.1615	0.367602	-3.15968	0.00157943	0.048749	DOWN
Ephb4	6.59162	-2.29135	0.724944	-3.16072	0.0015738	0.048749	DOWN
Apol10b	8.67344	-1.57098	0.49696	-3.16117	0.00157137	0.048749	DOWN
Vsir	104.454	-0.77641	0.245271	-3.16552	0.00154809	0.04848	DOWN
Creb3l2	31.5302	-1.00351	0.316541	-3.17025	0.00152306	0.0480698	DOWN
Mapk14	17.5131	-1.05068	0.331278	-3.1716	0.00151599	0.0480698	DOWN
Eppk1	2.2409	-3.54819	1.11732	-3.17564	0.00149508	0.0475679	DOWN
Zadh2	18.6454	-0.909032	0.286199	-3.17622	0.00149209	0.0475679	DOWN
Acvr1b	11.3255	-1.17698	0.369938	-3.18156	0.00146483	0.0473446	DOWN
Map4k4	11.9543	-1.09704	0.344555	-3.18392	0.00145293	0.0470859	DOWN
Pde3b	6.08786	-1.60179	0.502741	-3.18611	0.00144197	0.0470163	DOWN
Cd36	73.7305	-2.16678	0.679227	-3.19007	0.0014224	0.0465963	DOWN
Ighv5-4	26.7705	-5.00307	1.56701	-3.19275	0.00140924	0.0462904	DOWN
Gm11410	27.1009	-1.28636	0.402534	-3.19565	0.00139517	0.045953	DOWN
Chst12	38.4891	-1.02701	0.321154	-3.19789	0.00138438	0.0457222	DOWN
Prr5	44.5295	-0.716694	0.224107	-3.19801	0.00138382	0.0457222	DOWN
Mfsd4a	10.6879	-1.39855	0.435952	-3.20802	0.0013365	0.0445058	DOWN
Cd99l2	3.80041	-2.86972	0.894457	-3.20833	0.00133507	0.0445058	DOWN
Ptpre	20.5905	-1.06232	0.331061	-3.20883	0.00133278	0.0445058	DOWN
Anxa5	315.698	-0.582516	0.181509	-3.2093	0.00133059	0.0445058	DOWN
Rilpl1	9.97264	-1.49084	0.463904	-3.21368	0.00131047	0.0442486	DOWN
Gnb3	122.962	-1.71008	0.531566	-3.21705	0.00129515	0.0438538	DOWN
Litaf	205.204	-0.602085	0.186968	-3.22026	0.00128074	0.0437132	DOWN
Trim25	42.4159	-0.858593	0.266285	-3.22434	0.00126262	0.0433595	DOWN
Tspo	321.602	-0.627663	0.193847	-3.23793	0.00120402	0.0415835	DOWN
Adap1	2.76548	-3.30111	1.01878	-3.24027	0.00119419	0.0413619	DOWN
Slc44a4	4.25349	-3.43405	1.05445	-3.25671	0.00112711	0.0392636	DOWN
Pacsin2	54.5757	-0.82711	0.253444	-3.26349	0.00110051	0.0384478	DOWN
Add1	73.718	-0.593563	0.181703	-3.26666	0.00108826	0.03813	DOWN
Dennd3	7.13201	-2.15011	0.656638	-3.27442	0.00105879	0.0373089	DOWN
Rab5if	74.851	-0.583989	0.17779	-3.28472	0.00102084	0.036294	DOWN
Dap	209.731	-0.65218	0.198225	-3.2901	0.00100151	0.0357116	DOWN
Ints4	65.7514	-0.643421	0.195276	-3.29493	0.000984471	0.0352079	DOWN
Tnfrsf8	9.9628	-1.70624	0.517307	-3.29831	0.000972677	0.0348952	DOWN
Cd22	199.091	-0.718178	0.217291	-3.30515	0.000949271	0.0342531	DOWN
BC035044	39.4253	-0.719881	0.217467	-3.3103	0.000931948	0.0337287	DOWN
Gm15987	61.2693	-0.876034	0.264283	-3.31476	0.000917225	0.0332955	DOWN
Klc1	54.7668	-0.765336	0.23088	-3.31486	0.000916883	0.0332955	DOWN
Hdac5	41.1806	-0.810194	0.243732	-3.32412	0.000886988	0.0323925	DOWN
Grina	38.7966	-0.744897	0.224068	-3.32442	0.000886024	0.0323925	DOWN
Hmces	135.43	-0.779848	0.234166	-3.33031	0.000867479	0.0318726	DOWN
Fgd2	183.757	-0.861626	0.258573	-3.33223	0.000861516	0.0318471	DOWN
Man2a1	17.1934	-1.49681	0.449075	-3.3331	0.000858844	0.0318457	DOWN
Clstn3	4.43391	-4.02491	1.20545	-3.33893	0.000841029	0.0313776	DOWN
Rnase6	231.504	-0.705205	0.21119	-3.3392	0.000840202	0.0313776	DOWN
Dgkd	82.5227	-0.591141	0.176638	-3.34663	0.000817991	0.0308996	DOWN
Zfp296	125.338	-0.84968	0.253869	-3.34693	0.000817129	0.0308996	DOWN
Rtl5	3.0278	-3.49712	1.04314	-3.35248	0.000800917	0.0304506	DOWN
Bag2	8.34889	-1.55288	0.462934	-3.35443	0.000795294	0.0304225	DOWN
Stxbp3	28.8383	-1.01081	0.301022	-3.35792	0.000785303	0.0301928	DOWN
Adam15	8.45156	-2.70751	0.805396	-3.36171	0.000774604	0.029915	DOWN
Tmco3	20.34	-0.87393	0.259951	-3.36191	0.000774063	0.029915	DOWN
Endou	23.7337	-1.47508	0.438756	-3.36196	0.000773903	0.029915	DOWN
Lsp1	1230.36	-0.63071	0.18759	-3.36216	0.000773343	0.029915	DOWN
Pfkfb3	27.2887	-0.953555	0.28341	-3.36458	0.0007666	0.029915	DOWN
St6gal1	51.757	-0.961268	0.285509	-3.36686	0.000760294	0.029915	DOWN
Tspan14	46.4207	-0.650037	0.192399	-3.3786	0.000728568	0.0288752	DOWN
Rnf13	54.2406	-0.696581	0.206106	-3.37973	0.000725566	0.0288508	DOWN
Me2	74.743	-0.58853	0.173276	-3.39649	0.000682556	0.0276901	DOWN
Lef1	12.7635	-2.76327	0.812827	-3.39958	0.000674905	0.0276901	DOWN
Creg1	137.794	-1.00171	0.294606	-3.40015	0.000673484	0.0276901	DOWN
Pgpep1	19.3104	-1.19142	0.350269	-3.40146	0.00067028	0.0276901	DOWN
Nectin4	4.48603	-2.48642	0.730308	-3.40462	0.000662565	0.0276175	DOWN
Itpr1	24.8126	-1.30127	0.381456	-3.41132	0.000646482	0.0270404	DOWN
Slc17a9	19.4733	-1.76115	0.513851	-3.42736	0.000609491	0.0256708	DOWN
Chst7	50.1783	-1.2417	0.361635	-3.43356	0.000595705	0.0251779	DOWN
Ggta1	20.156	-1.10082	0.320273	-3.43712	0.000587943	0.0249371	DOWN
Elk4	68.7188	-0.613043	0.178351	-3.43728	0.000587586	0.0249371	DOWN
Espn	4.68023	-2.81173	0.817999	-3.43733	0.000587482	0.0249371	DOWN
Fcgrt	14.8394	-1.86706	0.542766	-3.4399	0.000581932	0.0249371	DOWN
Ociad2	13.6031	-2.18404	0.634736	-3.44086	0.00057986	0.0249371	DOWN
Gpd1l	44.662	-0.612407	0.177971	-3.44105	0.000579451	0.0249371	DOWN
Serinc5	7.46465	-2.35592	0.684588	-3.44137	0.00057877	0.0249371	DOWN
Prickle1	3.21591	-3.56149	1.0339	-3.44472	0.00057165	0.0248565	DOWN
Asph	10.0744	-2.89505	0.838638	-3.45208	0.000556277	0.0242754	DOWN
Mroh1	25.3	-0.953839	0.275245	-3.46542	0.0005294	0.0232705	DOWN
Acox3	57.6447	-0.661942	0.190739	-3.4704	0.000519676	0.0230104	DOWN
Rassf4	151.143	-0.954764	0.274159	-3.48252	0.000496725	0.0221071	DOWN
Cacna1i	6.83814	-2.5977	0.744297	-3.49014	0.000482776	0.021614	DOWN
Tppp	12.1351	-2.03918	0.582065	-3.50335	0.00045944	0.0208786	DOWN
Golm1	5.93536	-1.9085	0.543819	-3.50944	0.00044905	0.0204834	DOWN
Sostdc1	7.87145	-3.71419	1.05575	-3.51807	0.000434692	0.0199036	DOWN
Zcwpw1	75.9504	-2.23823	0.636134	-3.51849	0.000434011	0.0199036	DOWN
Pinlyp	28.403	-2.54952	0.724113	-3.52089	0.000430095	0.0198435	DOWN
Ypel3	43.4554	-0.880216	0.249323	-3.53042	0.000414906	0.019216	DOWN
Oxct1	94.2776	-0.614201	0.173739	-3.53519	0.000407476	0.0190177	DOWN
Kcnq4	7.04378	-2.54246	0.717473	-3.54362	0.000394668	0.018611	DOWN
Tubb2b	28.8108	-1.72367	0.485864	-3.54763	0.000388708	0.0184988	DOWN
Rab31	20.5838	-1.39991	0.394441	-3.54909	0.00038656	0.0184693	DOWN
Ehbp1l1	69.2825	-0.766638	0.215865	-3.55148	0.000383074	0.0183754	DOWN
Gm8995	43.85	-0.92392	0.259747	-3.55701	0.000375107	0.0180649	DOWN
Mettl7a1	19.2754	-1.31152	0.368422	-3.55983	0.000371102	0.0180146	DOWN
S100a10	593.33	-0.714275	0.200641	-3.55996	0.000370914	0.0180146	DOWN
Dhx33	15.9692	-1.05115	0.294051	-3.57473	0.000350585	0.0172975	DOWN
Dnm3	4.81428	-3.68802	1.03072	-3.5781	0.000346099	0.0171461	DOWN
Fam126a	19.7769	-1.22886	0.341813	-3.59513	0.000324233	0.0161289	DOWN
Atp13a2	89.3991	-0.780904	0.217152	-3.59612	0.000323	0.0161289	DOWN
Maml3	2.43014	-3.7634	1.04461	-3.6027	0.000314924	0.0158617	DOWN
Ablim2	3.7066	-3.78594	1.04944	-3.60759	0.000309058	0.0156314	DOWN
Adgre5	562.739	-0.600127	0.166212	-3.61061	0.000305484	0.0155155	DOWN
Fgl2	12.0426	-2.44698	0.676907	-3.61494	0.000300413	0.0153872	DOWN
Rnf139	28.6582	-0.81387	0.224856	-3.61952	0.000295154	0.0151822	DOWN
Pepd	446.543	-0.808784	0.222847	-3.62932	0.000284173	0.0146798	DOWN
Fbxo3	24.0105	-0.935347	0.257367	-3.63429	0.000278747	0.0144614	DOWN
Cmpk1	450.275	-0.662467	0.182124	-3.63746	0.000275344	0.0143464	DOWN
Tnfrsf13c	338.727	-0.802841	0.220592	-3.63948	0.000273192	0.0142959	DOWN
Gm50174	61.6468	-0.954184	0.25994	-3.67078	0.000241811	0.0128203	DOWN
5031439G07Rik	37.5126	-1.12974	0.307566	-3.67317	0.000239563	0.012757	DOWN
Aldh2	143.813	-0.601563	0.163376	-3.68208	0.000231338	0.0124285	DOWN
Csnk1e	20.1863	-1.08873	0.29558	-3.68338	0.00023016	0.0124204	DOWN
Mtch1	54.3407	-0.974046	0.264055	-3.6888	0.000225314	0.0122134	DOWN
Arid3b	40.4556	-0.930279	0.251843	-3.69389	0.000220851	0.0120748	DOWN
Scimp	16.0301	-2.05892	0.55618	-3.70189	0.000214001	0.0117584	DOWN
Man2a2	40.6745	-1.01876	0.274995	-3.70467	0.000211664	0.0117367	DOWN
Cyp4f18	434.728	-1.35233	0.364969	-3.70532	0.000211124	0.0117367	DOWN
Osbpl3	10.8222	-2.17294	0.586336	-3.70596	0.00021059	0.0117367	DOWN
Cyth4	132.009	-1.06435	0.287125	-3.70692	0.000209791	0.0117367	DOWN
Plin3	137.329	-0.605024	0.163077	-3.71005	0.000207222	0.0117367	DOWN
Fcgr2b	181.711	-1.3481	0.362793	-3.71589	0.00020249	0.011557	DOWN
Gpat3	5.86088	-3.55302	0.953027	-3.72814	0.000192895	0.0111034	DOWN
Srsf9	55.4118	-0.609146	0.163317	-3.72985	0.000191597	0.0110815	DOWN
Agbl1	3.84742	-4.43688	1.18735	-3.7368	0.000186376	0.0108313	DOWN
Tcp11l2	156.574	-0.920402	0.246258	-3.73756	0.000185817	0.0108313	DOWN
Sel1l	106.732	-0.911513	0.243349	-3.74571	0.000179887	0.0106592	DOWN
Mvb12b	4.14509	-4.49411	1.19931	-3.74724	0.000178794	0.0106466	DOWN
Gm21761	4.97099	-4.82148	1.28183	-3.76141	0.000168957	0.0101107	DOWN
Kctd12	18.1597	-0.984533	0.261548	-3.76425	0.000167052	0.0100464	DOWN
Stk38	152.796	-1.21113	0.321521	-3.76689	0.000165293	0.0099903	DOWN
Vim	1146.21	-1.18715	0.313657	-3.78487	0.000153792	0.00943673	DOWN
Cyp4f16	6.95703	-2.50806	0.662291	-3.78695	0.000152511	0.00940586	DOWN
Sptb	4.65232	-4.12665	1.08612	-3.79944	0.000145022	0.00898986	DOWN
Smpdl3a	28.8783	-1.78497	0.467473	-3.81834	0.000134351	0.00845849	DOWN
Twsg1	36.9993	-1.30186	0.340378	-3.82474	0.000130908	0.0082849	DOWN
Lat2	127.346	-0.644551	0.16851	-3.825	0.000130773	0.0082849	DOWN
Padi4	13.6311	-2.65288	0.691847	-3.83449	0.000125827	0.00804759	DOWN
Tpt1-ps5	12.3416	-1.33321	0.345558	-3.85814	0.000114253	0.00734625	DOWN
Sfxn3	32.9944	-1.07384	0.278171	-3.86036	0.000113221	0.00731879	DOWN
Rabac1	269.075	-0.640204	0.165506	-3.86816	0.000109661	0.00718659	DOWN
Suox	7.637	-1.96385	0.507021	-3.8733	0.00010737	0.00717063	DOWN
Cdk14	9.01836	-2.47758	0.63768	-3.8853	0.000102205	0.006902	DOWN
Tent5a	7.23167	-3.38639	0.870999	-3.88794	0.000101099	0.00686565	DOWN
Zeb2	39.1809	-1.21277	0.311119	-3.8981	9.69501e-05	0.00669676	DOWN
Ypel2	27.6829	-1.12456	0.287903	-3.90604	9.38228e-05	0.00651799	DOWN
Ckb	47.7481	-4.00784	1.02423	-3.91304	9.11421e-05	0.00644284	DOWN
Slc9a3r2	5.36279	-4.32159	1.10016	-3.92816	8.55993e-05	0.00608661	DOWN
AF067061	55.6071	-1.76674	0.449378	-3.93153	8.44065e-05	0.00607325	DOWN
Plin2	10.9107	-1.80484	0.455807	-3.95967	7.50547e-05	0.00549855	DOWN
Igsf21	11.5673	-2.93962	0.739841	-3.97331	7.08804e-05	0.00525646	DOWN
Rassf3	12.006	-1.55699	0.391396	-3.97804	6.94853e-05	0.005209	DOWN
Acp5	188.548	-0.997496	0.250439	-3.98299	6.80541e-05	0.00514149	DOWN
Slc48a1	176.146	-0.767432	0.192573	-3.98516	6.74347e-05	0.00512673	DOWN
Sparc	15.071	-3.99673	0.999965	-3.99686	6.4187e-05	0.00491071	DOWN
Slc15a3	38.6899	-1.6136	0.401419	-4.01974	5.82613e-05	0.00454363	DOWN
Pip5k1b	6.22	-3.25762	0.809904	-4.02224	5.76483e-05	0.00452501	DOWN
Agfg2	27.2136	-1.2055	0.297877	-4.04699	5.18816e-05	0.00415327	DOWN
Fcrla	647.241	-0.676456	0.166484	-4.06318	4.84078e-05	0.00390103	DOWN
Apobec2	23.9095	-1.92565	0.473815	-4.06413	4.82109e-05	0.00390103	DOWN
Mrc1	11.7138	-2.41487	0.59324	-4.07064	4.6884e-05	0.00382928	DOWN
Camk2n1	10.6519	-3.02571	0.740577	-4.08562	4.39593e-05	0.00361483	DOWN
Cmtm6	80.3221	-0.621626	0.152069	-4.0878	4.35488e-05	0.00360561	DOWN
Cript	62.2814	-0.706743	0.172722	-4.09179	4.28054e-05	0.00359315	DOWN
Ankle2	39.1977	-0.843883	0.205786	-4.10079	4.11751e-05	0.0035051	DOWN
Irf8	172.622	-1.08592	0.262974	-4.12939	3.63733e-05	0.00320935	DOWN
Bscl2	143.611	-0.618766	0.149036	-4.15179	3.29888e-05	0.00295384	DOWN
Arhgap20	8.27102	-4.95107	1.19076	-4.15792	3.21157e-05	0.00289712	DOWN
Cbx7	71.9673	-0.825591	0.197602	-4.17805	2.94016e-05	0.00269247	DOWN
Myadm	131.946	-1.31356	0.314338	-4.17882	2.93032e-05	0.00269247	DOWN
Lgals1	1144.75	-1.39601	0.332267	-4.20148	2.65178e-05	0.00246574	DOWN
Lima1	8.67786	-3.73858	0.887508	-4.21244	2.52626e-05	0.00236724	DOWN
Naaa	18.7362	-1.35217	0.319824	-4.22788	2.35908e-05	0.00226322	DOWN
Tmem163	32.9899	-0.979116	0.230674	-4.24459	2.18997e-05	0.00215222	DOWN
Rhoq	14.0285	-1.62535	0.382464	-4.24969	2.14068e-05	0.00212103	DOWN
Myl9	32.8478	-3.80075	0.893707	-4.2528	2.11118e-05	0.00210908	DOWN
Tmem51	13.415	-3.26623	0.766301	-4.26233	2.02302e-05	0.00205262	DOWN
Phkb	49.8427	-1.68108	0.394166	-4.26491	1.99984e-05	0.00204865	DOWN
Tubb3	10.78	-2.26046	0.529738	-4.26712	1.98008e-05	0.00204575	DOWN
Ighv1-55	61.2441	-4.58127	1.07184	-4.2742	1.91824e-05	0.00199894	DOWN
Srebf2	86.6669	-0.782176	0.182841	-4.27791	1.8866e-05	0.00198307	DOWN
Cecr2	9.84265	-2.16315	0.50249	-4.30487	1.67083e-05	0.00177167	DOWN
Il6ra	73.1339	-1.15417	0.267885	-4.30846	1.64397e-05	0.00175861	DOWN
Ctsh	506.357	-0.880638	0.204132	-4.31407	1.6028e-05	0.00172988	DOWN
Fem1a	25.9057	-1.34044	0.310498	-4.31708	1.58109e-05	0.00172182	DOWN
Gpr137b-ps	33.4673	-1.33092	0.306091	-4.34813	1.37304e-05	0.00152269	DOWN
4833407H14Rik	36.2235	-1.68473	0.387284	-4.35011	1.36067e-05	0.00152269	DOWN
Calhm2	40.4545	-1.66403	0.382164	-4.35424	1.3353e-05	0.00150852	DOWN
Mfsd10	177.113	-0.744017	0.170849	-4.35483	1.3317e-05	0.00150852	DOWN
C130026I21Rik	87.4585	-1.68497	0.384302	-4.38451	1.16248e-05	0.00135398	DOWN
Ahnak	149.239	-1.03946	0.234726	-4.42838	9.49454e-06	0.0011477	DOWN
Ralgps2	163.244	-0.588779	0.132696	-4.43707	9.1193e-06	0.00111348	DOWN
Pqlc3	83.4233	-1.1917	0.26789	-4.44848	8.64812e-06	0.00106672	DOWN
Akt1	18.0519	-1.3406	0.30072	-4.45796	8.27428e-06	0.00103113	DOWN
Abhd6	69.6215	-1.07509	0.240366	-4.4727	7.72374e-06	0.000972547	DOWN
Bnip5	13.6114	-2.45831	0.549188	-4.47625	7.59649e-06	0.000972547	DOWN
Mrgpre	14.6362	-1.55242	0.343942	-4.5136	6.37362e-06	0.000837439	DOWN
Ahnak2	155.917	-1.721	0.380528	-4.52266	6.10682e-06	0.000811201	DOWN
Rcn3	69.3714	-1.47709	0.325581	-4.53678	5.71205e-06	0.000767191	DOWN
Sbk1	50.1268	-1.72023	0.377543	-4.55639	5.20405e-06	0.000714847	DOWN
Ndrg1	12.5354	-2.5257	0.553114	-4.56632	4.96361e-06	0.000697676	DOWN
B3gnt8	12.7796	-3.68912	0.807077	-4.57097	4.85472e-06	0.000690398	DOWN
Dkkl1	21.7972	-1.54414	0.337464	-4.5757	4.7462e-06	0.000683001	DOWN
Rtn4rl1	13.9048	-1.97578	0.431739	-4.57634	4.73185e-06	0.000683001	DOWN
Kctd14	39.0454	-3.09652	0.673989	-4.59432	4.34161e-06	0.000656017	DOWN
Sytl1	21.5103	-2.19101	0.476746	-4.59576	4.31166e-06	0.000656017	DOWN
Rin3	85.5084	-1.53723	0.334314	-4.59815	4.26253e-06	0.000656017	DOWN
Pik3ip1	46.08	-1.28222	0.277209	-4.62548	3.73733e-06	0.000618861	DOWN
AC133103.1	19.3895	-1.68532	0.363656	-4.63437	3.58033e-06	0.000601097	DOWN
H6pd	21.0758	-1.69728	0.363273	-4.67218	2.9802e-06	0.000534545	DOWN
Ak3	38.4667	-0.9406	0.20036	-4.69455	2.67192e-06	0.000489366	DOWN
Fcer1g	134.505	-1.77784	0.377209	-4.71313	2.43941e-06	0.000460744	DOWN
Sun2	90.9296	-0.967374	0.202938	-4.76685	1.87133e-06	0.000359057	DOWN
Upb1	34.9395	-1.77627	0.370664	-4.79214	1.65015e-06	0.000322323	DOWN
Gpr146	10.8694	-2.87275	0.597494	-4.80799	1.52452e-06	0.000307141	DOWN
AI427809	90.1897	-1.54408	0.321092	-4.80883	1.51819e-06	0.000307141	DOWN
Acaa2	59.9858	-0.888269	0.184653	-4.81047	1.50576e-06	0.000307141	DOWN
Evi5	18.0067	-1.96384	0.405142	-4.84729	1.25161e-06	0.000265429	DOWN
Hes1	34.2181	-2.48718	0.507866	-4.89732	9.71515e-07	0.00022584	DOWN
Gpr137b	37.5166	-1.2717	0.259542	-4.89981	9.59288e-07	0.00022584	DOWN
Cmah	65.6334	-0.871585	0.177764	-4.90305	9.43603e-07	0.00022584	DOWN
Shisa8	35.7542	-1.50436	0.306465	-4.90875	9.16604e-07	0.00022584	DOWN
Anxa2	294.642	-1.9419	0.395373	-4.91158	9.0345e-07	0.00022584	DOWN
Cdc25b	59.8904	-1.0878	0.221182	-4.91811	8.73836e-07	0.00022584	DOWN
Plec	57.9782	-1.6193	0.328214	-4.93366	8.07019e-07	0.00022171	DOWN
Hepacam2	127.139	-1.2902	0.260529	-4.95221	7.33737e-07	0.000206266	DOWN
Mtss1	107.517	-1.04054	0.205444	-5.06484	4.08735e-07	0.000120507	DOWN
Lpcat4	44.761	-2.00895	0.391851	-5.12681	2.94686e-07	9.37413e-05	DOWN
Itgb7	361.503	-1.19818	0.23356	-5.13007	2.89641e-07	9.37413e-05	DOWN
Cst3	356.672	-1.12143	0.218196	-5.13958	2.75346e-07	9.24552e-05	DOWN
Dusp3	18.4762	-1.97584	0.384284	-5.14162	2.72377e-07	9.24552e-05	DOWN
Slamf9	161.776	-2.07092	0.39953	-5.1834	2.1788e-07	7.98101e-05	DOWN
Nacc2	159.718	-1.62179	0.312324	-5.19264	2.07331e-07	7.83192e-05	DOWN
Ehd4	66.2498	-1.2664	0.240869	-5.25765	1.45909e-07	5.68951e-05	DOWN
Hexb	94.2962	-1.34834	0.256354	-5.25966	1.44325e-07	5.68951e-05	DOWN
Pip5k1c	37.2956	-1.01357	0.188171	-5.38642	7.18752e-08	3.21788e-05	DOWN
Afdn	25.4117	-1.99296	0.368395	-5.40984	6.30802e-08	3.00298e-05	DOWN
Rab3b	25.9884	-2.89837	0.52791	-5.49027	4.01311e-08	2.20502e-05	DOWN
Igsf8	62.94	-1.65101	0.300582	-5.49271	3.95811e-08	2.20502e-05	DOWN
Lmo2	12.8336	-4.63268	0.829062	-5.58785	2.29897e-08	1.3895e-05	DOWN
Dipk1a	26.9842	-1.63135	0.290485	-5.61594	1.955e-08	1.24379e-05	DOWN
AC168977.1	37.6941	-2.08739	0.367778	-5.67568	1.38141e-08	9.27691e-06	DOWN
Gng13	64.2641	-2.23387	0.383395	-5.82655	5.65864e-09	4.88583e-06	DOWN
Rsu1	78.4213	-0.909541	0.153918	-5.90924	3.43688e-09	3.19577e-06	DOWN
Gt(ROSA)26Sor	13.1076	-3.4606	0.554221	-6.24407	4.26317e-10	5.15332e-07	DOWN
Arid3a	76.1648	-1.45451	0.22668	-6.41659	1.39359e-10	2.14015e-07	DOWN
Gng12	52.2627	-1.62258	0.228414	-7.1037	1.21458e-12	2.93636e-09	DOWN
Krt18	62.0274	-2.82016	0.376278	-7.49487	6.63622e-14	2.00547e-10	DOWN
Pafah1b3	291.143	-1.08997	0.138042	-7.89596	2.88079e-15	1.16077e-11	DOWN
Cnn3	72.1487	-3.87684	0.429322	-9.03013	1.71472e-19	2.07275e-15	DOWN

## Sheet: S6B
Suppl Table S6B Differentially expressed genes in lymphomas of IKK2ca TCL1 mice compared to TCL1 mice
Genes upregulated in lymphomas of IKK2ca TCL1 mice compared to TCL1 mice (FC >1.5, padj <0.05)
Gene	baseMean	log2FoldChange	lfcSE	stat	pvalue	padj	diffexpressed
Tank	92.3217	0.942548	0.155439	6.06377	1.33e-09	6.66e-06	UP
Rpl32l	76.5419	0.846696	0.141353	5.98992	2.1e-09	7.88e-06	UP
Relb	172.622	1.17128	0.200356	5.846	5.04e-09	1.26e-05	UP
Emb	51.9543	1.95368	0.342476	5.70456	1.17e-08	1.75e-05	UP
Lmo7	15.4438	2.19899	0.399431	5.50531	3.69e-08	4.61e-05	UP
Cd40	89.165	1.25408	0.228519	5.48787	4.07e-08	4.7e-05	UP
Parp8	6.84717	2.77709	0.508092	5.46573	4.61e-08	4.93e-05	UP
Nav2	10.0304	3.09757	0.581034	5.33112	9.76e-08	8.14e-05	UP
Ahcyl2	28.9306	1.69818	0.323911	5.24273	1.58e-07	0.0001131	UP
Pygl	25.649	1.68176	0.321298	5.23425	1.66e-07	0.0001131	UP
Gm9701	52.8281	0.690192	0.132477	5.20989	1.89e-07	0.0001234	UP
Ackr3	30.9135	1.77802	0.348068	5.10827	3.25e-07	0.00018782	UP
Ikbke	16.9609	1.17302	0.231032	5.07728	3.83e-07	0.00020538	UP
Nedd4	78.899	1.17018	0.235958	4.95928	7.08e-07	0.00033689	UP
Ncan	8.15219	2.4531	0.49606	4.94516	7.61e-07	0.00033689	UP
Ltb	234.82	1.32309	0.267576	4.9447	7.63e-07	0.00033689	UP
Ifi203	68.5981	0.881123	0.184572	4.77387	1.81e-06	0.00067858	UP
Lta	27.2688	2.06411	0.435748	4.73695	2.17e-06	0.0007759	UP
Mndal	137.096	1.08805	0.233	4.66973	3.02e-06	0.00098476	UP
Il12a	45.2984	1.52071	0.327038	4.64995	3.32e-06	0.00106103	UP
Eed	67.9409	0.590411	0.127536	4.62938	3.67e-06	0.00114767	UP
Gm7434	41.8525	0.689027	0.149745	4.60134	4.2e-06	0.00128675	UP
Gm44336	6.8659	1.44685	0.315858	4.58071	4.63e-06	0.00135786	UP
Gm8129	58.2035	0.607354	0.132676	4.57771	4.7e-06	0.00135786	UP
Fcer2a	14.3775	2.05743	0.46101	4.46288	8.09e-06	0.00205865	UP
Rps15a-ps1	64.4526	0.663755	0.149437	4.44171	8.92e-06	0.00216206	UP
Lpcat1	68.7672	0.779055	0.178907	4.35451	1.33e-05	0.00292026	UP
D630008O14Rik	7.63495	1.63078	0.375597	4.34184	1.41e-05	0.00303178	UP
Gm6133	23.278	0.763441	0.176997	4.31329	1.61e-05	0.00317871	UP
Platr27	7.99468	1.63581	0.380365	4.30064	1.7e-05	0.00332201	UP
Trim34a	38.5847	1.16361	0.27289	4.26404	2.01e-05	0.0036774	UP
Gm5779	69.1446	0.672278	0.157819	4.2598	2.05e-05	0.00370274	UP
Gm11998	43.3672	0.889311	0.209162	4.25178	2.12e-05	0.00374192	UP
Ift140	53.5262	1.07646	0.253314	4.2495	2.14e-05	0.00374192	UP
Trim7	33.063	0.91814	0.216341	4.24394	2.2e-05	0.00379169	UP
Gm9351	27.9908	0.827711	0.196187	4.21898	2.45e-05	0.00396674	UP
Fam167a	22.6014	1.16759	0.276829	4.21772	2.47e-05	0.00396674	UP
Sdhaf1	60.9919	0.634741	0.150566	4.2157	2.49e-05	0.00396674	UP
Gm39556	16.7535	1.10973	0.263639	4.20929	2.56e-05	0.00396674	UP
Helz2	13.9641	1.02301	0.244261	4.18819	2.81e-05	0.00418169	UP
Casp6	67.5884	0.931106	0.222804	4.17904	2.93e-05	0.00431081	UP
Uchl4	35.7845	0.638115	0.153216	4.1648	3.12e-05	0.00454422	UP
Lyst	50.8727	1.41545	0.341252	4.14781	3.36e-05	0.00473477	UP
AW112010	171.196	0.948244	0.228792	4.14457	3.4e-05	0.00473477	UP
Grap	431.724	0.794347	0.192171	4.13355	3.57e-05	0.00483348	UP
Gm5451	20.0419	0.828701	0.204459	4.05313	5.05e-05	0.00633405	UP
Med11	90.2824	0.648288	0.160333	4.04338	5.27e-05	0.00643365	UP
Myl4	25.7943	1.35748	0.341343	3.97688	6.98e-05	0.00812993	UP
Dennd2d	41.3481	0.837281	0.21146	3.95952	7.51e-05	0.00850308	UP
Hcst	63.8665	0.778153	0.196557	3.95891	7.53e-05	0.00850308	UP
Pinx1	28.5809	0.665359	0.168163	3.95663	7.6e-05	0.00852048	UP
Mtap	45.7596	0.649467	0.165397	3.92671	8.61e-05	0.00937285	UP
1810073O08Rik	11.481	1.88193	0.481156	3.91127	9.18e-05	0.00989285	UP
Tfe3	36.0631	0.718977	0.183871	3.91022	9.22e-05	0.00989285	UP
Izumo4	13.9514	1.15327	0.295716	3.89992	9.62e-05	0.0101779	UP
Gbp2	187.231	1.08391	0.278642	3.88999	0.00010025	0.0105297	UP
Rras2	9.07471	1.88557	0.491468	3.83662	0.00012474	0.0124907	UP
Tnf	28.1455	1.2197	0.319797	3.81399	0.00013674	0.0133368	UP
Rps19-ps13	59.5427	0.616993	0.162185	3.80425	0.00014223	0.013783	UP
Birc3	75.5161	0.716208	0.18855	3.7985	0.00014557	0.0138417	UP
Rnf138	55.6216	0.586214	0.154411	3.79644	0.00014679	0.0138664	UP
1700016L21Rik	9.19438	2.52292	0.667083	3.78202	0.00015556	0.0145129	UP
Cd59a	35.6988	1.4633	0.387559	3.77569	0.00015956	0.0146136	UP
Myof	18.4523	1.56592	0.415915	3.76501	0.00016654	0.0151606	UP
Rps15a-ps3	16.7313	0.740373	0.198729	3.72554	0.0001949	0.0168239	UP
Rpl18a-ps3	20.2298	0.772902	0.208326	3.71006	0.00020721	0.0174851	UP
Tes	68.7786	1.33251	0.359306	3.70857	0.00020844	0.01749	UP
Cep162	9.95522	1.03912	0.280809	3.70044	0.00021523	0.017762	UP
Ptgs1	3.82634	3.83329	1.03731	3.69542	0.00021952	0.01797	UP
Gm14020	18.4944	0.756361	0.204791	3.69333	0.00022133	0.01797	UP
Cisd1	81.6707	0.595223	0.161604	3.68321	0.00023031	0.0184007	UP
Marcksl1	186.862	0.735981	0.200014	3.67965	0.00023355	0.0184277	UP
Mcoln3	14.1528	1.30154	0.353795	3.6788	0.00023433	0.0184277	UP
Gm11285	27.6054	0.62799	0.170935	3.67385	0.00023893	0.0184819	UP
Kcns1	9.81416	1.89532	0.516065	3.67265	0.00024005	0.0184819	UP
Gm20673	10.8443	0.935522	0.254818	3.67133	0.00024129	0.0184819	UP
Uros	17.4322	0.811879	0.223584	3.6312	0.0002821	0.0206593	UP
Carmil2	6.78594	1.19736	0.331214	3.61506	0.00030028	0.0214774	UP
Stat1	169.71	0.754163	0.209361	3.60222	0.00031552	0.0221217	UP
Gm7776	24.7036	0.641568	0.178669	3.59083	0.00032963	0.0227112	UP
Ak7	5.28708	2.15363	0.602398	3.5751	0.0003501	0.0236868	UP
Lst1	21.4253	1.02941	0.288091	3.5732	0.00035264	0.0237518	UP
Lck	94.5302	1.12119	0.31539	3.55494	0.00037807	0.0245825	UP
Ctso	126.214	0.650122	0.183007	3.55245	0.00038166	0.024709	UP
Polr3e	30.606	0.71176	0.20077	3.54515	0.00039238	0.0251863	UP
Gm9922	7.73603	1.46031	0.413444	3.53205	0.00041234	0.0262432	UP
Smco4	36.2941	0.683337	0.195132	3.50193	0.00046191	0.0285509	UP
Gm8748	16.0971	0.68048	0.195179	3.48644	0.0004895	0.0294535	UP
Btbd11	5.41594	2.12442	0.609576	3.48507	0.00049201	0.0294535	UP
Nfkb2	142.551	0.838834	0.241079	3.4795	0.00050234	0.0298303	UP
Gm12787	19.6492	0.689	0.198021	3.47944	0.00050247	0.0298303	UP
Elf3	2.12484	3.23328	0.934682	3.45923	0.00054172	0.0314156	UP
Gm45548	2.61321	2.61788	0.757285	3.45693	0.00054637	0.0314493	UP
4930426D05Rik	15.513	1.07299	0.310663	3.45388	0.00055258	0.0314493	UP
Rara	51.224	0.664341	0.193255	3.43763	0.00058682	0.032286	UP
Fam83g	17.7794	0.865325	0.252312	3.42959	0.0006045	0.0327	UP
Asb2	7.88419	2.39432	0.700242	3.41928	0.00062788	0.0334423	UP
Gm30747	12.631	0.797527	0.233451	3.41626	0.00063488	0.0336285	UP
Lgals3bp	79.0241	0.95008	0.278847	3.40718	0.00065638	0.0343516	UP
Pik3r4	29.6141	0.79205	0.232572	3.40561	0.00066015	0.0344032	UP
Tspan1	1.85386	3.33901	0.982972	3.39685	0.00068167	0.0351844	UP
Gm2189	8.09567	0.948676	0.280055	3.38746	0.00070542	0.0359166	UP
Rtp4	5.85188	1.98338	0.58975	3.36308	0.00077077	0.0380822	UP
Fyb	21.1143	2.43088	0.72306	3.36194	0.00077397	0.038115	UP
Gm43524	6.37304	1.11328	0.332154	3.35171	0.00080316	0.0389142	UP
Actg2	22.8269	0.746204	0.22386	3.33336	0.00085805	0.0406669	UP
Runx3	16.7694	1.13748	0.343946	3.30715	0.00094251	0.0433548	UP
Gm31597	9.61412	0.834409	0.254318	3.28097	0.0010345	0.046091	UP
Il4i1	181.578	1.14279	0.349817	3.26681	0.00108765	0.0472155	UP
Defb6	1.32595	3.21659	0.989524	3.25064	0.00115145	0.0491042	UP
Il21r	33.6835	0.986036	0.303871	3.24492	0.00117485	0.0494542	UP
Genes downregulated in lymphomas of IKK2ca TCL1 mice compared to TCL1 mice (FC <-1.5, padj <0.05)
Gene	baseMean	log2FoldChange	lfcSE	stat	pvalue	padj	diffexpressed
4833407H14Rik	35.9479	-1.28865	0.311747	-4.13364	3.57e-05	0.00483348	DOWN
4930455G09Rik	1.1661	-2.87888	0.797638	-3.60925	0.00030708	0.0218279	DOWN
Abhd6	69.1478	-1.00519	0.162708	-6.17789	6.5e-10	6.38e-06	DOWN
Abhd8	8.878	-1.48918	0.359019	-4.14792	3.36e-05	0.00473477	DOWN
Actr3b	4.02476	-1.79701	0.548232	-3.27783	0.0010461	0.0463493	DOWN
Adam15	8.08904	-1.83515	0.536282	-3.42199	0.00062164	0.0333466	DOWN
Adam19	22.0358	-0.974622	0.245541	-3.96928	7.21e-05	0.00826547	DOWN
Adamts10	11.1655	-0.9249	0.254009	-3.64121	0.00027136	0.0201248	DOWN
Adgre1	4.26832	-3.08011	0.853751	-3.60774	0.00030888	0.0218279	DOWN
Agbl1	3.13583	-3.8507	0.88906	-4.3312	1.48e-05	0.00309066	DOWN
Agfg2	27.7594	-0.970549	0.207161	-4.68501	2.8e-06	0.0009344	DOWN
Ak3	39.9385	-0.765057	0.180812	-4.23124	2.32e-05	0.00396674	DOWN
Ak8	7.59554	-1.7118	0.387423	-4.41842	9.94e-06	0.00233343	DOWN
Arhgap20	7.36308	-2.74568	0.758721	-3.61882	0.00029595	0.0212685	DOWN
Arid3a	84.7048	-0.75721	0.170997	-4.4282	9.5e-06	0.00226546	DOWN
Arid3b	43.0278	-0.695267	0.182861	-3.80216	0.00014344	0.0138108	DOWN
Auh	142.604	-0.659323	0.174459	-3.77924	0.00015731	0.0145848	DOWN
Banf2os	1.55383	-3.29072	0.798801	-4.11957	3.8e-05	0.00509044	DOWN
Bcl2l11	12.6858	-1.2642	0.36584	-3.4556	0.00054907	0.0314493	DOWN
Bnip5	14.1238	-1.37175	0.314933	-4.3557	1.33e-05	0.00292026	DOWN
Cacfd1	21.5504	-0.618633	0.173619	-3.56318	0.0003664	0.0240317	DOWN
Cacna1i	6.53067	-1.84539	0.444777	-4.14903	3.34e-05	0.00473477	DOWN
Cd36	63.8736	-2.25101	0.498229	-4.51803	6.24e-06	0.0017046	DOWN
Cd93	5.2462	-4.43161	1.25254	-3.53811	0.000403	0.025758	DOWN
Cecr2	8.71818	-2.07869	0.393712	-5.27972	1.29e-07	9.72e-05	DOWN
Chd1	93.5618	-0.764888	0.192683	-3.96967	7.2e-05	0.00826547	DOWN
Ckb	37.8555	-4.24397	0.732264	-5.79568	6.8e-09	1.34e-05	DOWN
Clstn3	3.85884	-2.78704	0.809822	-3.44154	0.00057841	0.0322227	DOWN
Cnn3	74.3508	-1.6244	0.34189	-4.75123	2.02e-06	0.00074067	DOWN
Cpd	3.68544	-2.9125	0.718635	-4.05282	5.06e-05	0.00633405	DOWN
Cplx2	6.79574	-1.48578	0.457901	-3.24477	0.00117544	0.0494542	DOWN
Crat	21.5109	-0.67342	0.197146	-3.41584	0.00063585	0.0336285	DOWN
Csf2rb	55.1129	-0.825336	0.204008	-4.0456	5.22e-05	0.00643365	DOWN
Cst3	381.51	-0.752361	0.226654	-3.31942	0.00090205	0.0425821	DOWN
Ctsb	385.634	-0.664858	0.181153	-3.67015	0.00024241	0.0184819	DOWN
Ctse	20.338	-1.07728	0.327401	-3.29039	0.0010005	0.0452635	DOWN
Ctsh	542.102	-0.632453	0.161926	-3.90581	9.39e-05	0.0100038	DOWN
Cyp4f18	463.087	-0.865163	0.257555	-3.35914	0.00078187	0.038378	DOWN
Dap	218.006	-0.616062	0.169219	-3.64061	0.00027199	0.0201248	DOWN
Dnm3	4.00498	-3.33038	0.655283	-5.08235	3.73e-07	0.00020538	DOWN
Dusp3	19.972	-1.04386	0.286528	-3.64314	0.00026934	0.0201248	DOWN
Dynlt1-ps1	17.9223	-0.876334	0.262904	-3.33328	0.00085828	0.0406669	DOWN
Ehd3	22.8633	-1.42817	0.297813	-4.79553	1.62e-06	0.00063815	DOWN
Ehd4	66.5259	-1.05535	0.206082	-5.12102	3.04e-07	0.00018257	DOWN
Endou	21.5058	-1.63235	0.387599	-4.21144	2.54e-05	0.00396674	DOWN
Ethe1	57.1275	-0.705679	0.158656	-4.44785	8.67e-06	0.00216206	DOWN
Evi5	18.8443	-1.14044	0.348545	-3.27201	0.00106787	0.0468166	DOWN
Fam214a	40.0758	-0.841848	0.206452	-4.07769	4.55e-05	0.00583928	DOWN
Fam214b	20.3757	-0.787031	0.22066	-3.56672	0.00036147	0.0240317	DOWN
Fcer1g	129.612	-1.4548	0.308544	-4.71505	2.42e-06	0.00082491	DOWN
Fcgrt	13.5898	-1.7301	0.410978	-4.20973	2.56e-05	0.00396674	DOWN
Fcrla	644.262	-0.772082	0.159233	-4.84877	1.24e-06	0.00053313	DOWN
Fgl2	9.92232	-2.82736	0.527681	-5.35808	8.41e-08	7.43e-05	DOWN
Fstl1	14.0072	-2.22119	0.623046	-3.56505	0.00036378	0.0240317	DOWN
Galnt14	2.73555	-3.93082	0.894064	-4.39657	1.1e-05	0.00252141	DOWN
Gba2	7.4801	-1.00024	0.29207	-3.42467	0.00061555	0.0331383	DOWN
Gm21761	4.55959	-2.51233	0.767258	-3.27442	0.00105878	0.046636	DOWN
Gm23935	155.824	-1.89638	0.583819	-3.24823	0.00116125	0.0491323	DOWN
Gm32200	0.951194	-2.70447	0.823078	-3.2858	0.00101693	0.0455948	DOWN
Gm50174	61.6888	-0.905874	0.209287	-4.32838	1.5e-05	0.00309066	DOWN
Gm5547	35.6844	-0.782707	0.211175	-3.70643	0.0002102	0.0175374	DOWN
Gm8848	1.49553	-3.27956	0.938962	-3.49275	0.00047807	0.0291896	DOWN
Gm8995	46.685	-0.678786	0.20007	-3.39274	0.00069197	0.0354725	DOWN
Gng13	63.9901	-1.47468	0.293368	-5.02674	4.99e-07	0.00025838	DOWN
Gpat3	5.44763	-2.23465	0.555696	-4.02135	5.79e-05	0.00700923	DOWN
Gpr137b	40.0882	-0.832367	0.192832	-4.31653	1.58e-05	0.00317421	DOWN
Gpr146	9.88137	-2.13566	0.391567	-5.45415	4.92e-08	4.93e-05	DOWN
Gpx3	9.9315	-2.1491	0.603018	-3.5639	0.00036538	0.0240317	DOWN
Gt(ROSA)26Sor	13.1199	-1.70464	0.453202	-3.76131	0.00016902	0.0152789	DOWN
Guca2b	2.92113	-1.77835	0.537795	-3.30674	0.00094388	0.0433548	DOWN
Hap1	2.00692	-2.84502	0.84145	-3.3811	0.00072197	0.0363754	DOWN
Hdac5	43.0322	-0.679347	0.178849	-3.79845	0.0001456	0.0138417	DOWN
Hdac7	20.9992	-0.703963	0.194387	-3.62146	0.00029295	0.0211541	DOWN
Hes1	38.5449	-1.00142	0.299254	-3.3464	0.00081869	0.0394127	DOWN
Hexb	99.7861	-0.887123	0.179053	-4.95453	7.25e-07	0.00033689	DOWN
Hmces	132.42	-0.900522	0.233487	-3.85684	0.00011486	0.0118928	DOWN
Hpse	52.7708	-1.17969	0.206604	-5.70993	1.13e-08	1.75e-05	DOWN
Hspa12b	1.45725	-3.77567	1.13183	-3.3359	0.00085025	0.0406646	DOWN
Hspa1b	104.023	-2.72665	0.787371	-3.46298	0.00053423	0.0311806	DOWN
Ighv5-4	20.5468	-6.41616	1.19196	-5.38286	7.33e-08	6.88e-05	DOWN
Igkj2	78.5174	-2.98891	0.80671	-3.70507	0.00021134	0.0175374	DOWN
Igkv6-20	8.99566	-3.47405	0.695112	-4.99783	5.8e-07	0.00029027	DOWN
Iglv1	319.396	-2.2372	0.687625	-3.25351	0.00113987	0.0489168	DOWN
Igsf21	10.3323	-2.31852	0.566083	-4.09572	4.21e-05	0.00552337	DOWN
Igsf8	66.8721	-1.00406	0.242237	-4.14495	3.4e-05	0.00473477	DOWN
Il6ra	77.7816	-0.783647	0.231613	-3.38343	0.00071586	0.0362028	DOWN
Itga8	1.63911	-3.66172	0.991908	-3.69159	0.00022286	0.0179961	DOWN
Itpr1	25.5403	-0.975825	0.281097	-3.47148	0.00051759	0.0306071	DOWN
Jhy	2.67018	-4.11795	0.979215	-4.20536	2.61e-05	0.00399507	DOWN
Jup	6.99493	-1.74997	0.492984	-3.54975	0.0003856	0.0248569	DOWN
Kcnk10	3.60223	-2.42502	0.645199	-3.75856	0.0001709	0.0152789	DOWN
Lgals1	1226.91	-0.860379	0.254119	-3.38573	0.00070989	0.0360223	DOWN
Lima1	8.51053	-1.91926	0.508071	-3.77754	0.00015839	0.0145949	DOWN
Lpcat4	51.4176	-0.827905	0.254627	-3.25144	0.00114822	0.0491042	DOWN
Mad2l1bp	37.3044	-0.65048	0.195043	-3.33506	0.00085282	0.0406646	DOWN
Mafa	2.02357	-3.4976	1.04606	-3.3436	0.00082698	0.0396844	DOWN
Man2a1	17.6357	-1.05224	0.295438	-3.56163	0.00036857	0.0240689	DOWN
Man2a2	43.9234	-0.678848	0.206951	-3.28024	0.0010372	0.046091	DOWN
Mapk14	18.3086	-0.819821	0.222729	-3.6808	0.0002325	0.0184277	DOWN
Mapk3	23.4014	-0.662736	0.201678	-3.28612	0.00101579	0.0455948	DOWN
Mgst3	7.93776	-1.50104	0.416808	-3.60128	0.00031666	0.0221217	DOWN
Mrc1	11.5067	-1.57561	0.47572	-3.31204	0.00092617	0.0428458	DOWN
Mtss1	117.671	-0.640043	0.164979	-3.87954	0.00010465	0.0109159	DOWN
Mxra8	14.8814	-1.02179	0.296931	-3.44116	0.00057924	0.0322227	DOWN
Myl9	28.2838	-2.88069	0.686619	-4.19548	2.72e-05	0.00408989	DOWN
Naaa	21.0973	-0.692725	0.190379	-3.63866	0.00027406	0.0201782	DOWN
Nab1	13.7232	-0.95311	0.293365	-3.24888	0.00115859	0.0491323	DOWN
Nectin4	4.62735	-1.38607	0.413875	-3.34899	0.00081106	0.0391707	DOWN
Ngfr	1.3908	-3.69307	1.04725	-3.52646	0.00042115	0.0264674	DOWN
Olfml2a	3.25571	-2.70035	0.683222	-3.95238	7.74e-05	0.00860885	DOWN
Osbpl3	10.3045	-1.6653	0.445744	-3.73599	0.00018698	0.0164235	DOWN
Padi4	12.9032	-1.88574	0.474018	-3.9782	6.94e-05	0.00812993	DOWN
Pcolce	2.38299	-2.62674	0.770432	-3.40944	0.00065096	0.0341866	DOWN
Pinlyp	25.3293	-2.22393	0.494601	-4.49643	6.91e-06	0.0018535	DOWN
Plac8	3841.94	-0.597989	0.124577	-4.80017	1.59e-06	0.00063815	DOWN
Plcl2	16.1186	-0.723042	0.221216	-3.26849	0.00108123	0.0470726	DOWN
Pqlc3	84.1295	-1.00161	0.188308	-5.31898	1.04e-07	8.25e-05	DOWN
Prickle1	3.24599	-1.72433	0.50283	-3.42926	0.00060523	0.0327	DOWN
Prkce	17.9793	-0.765727	0.222188	-3.4463	0.00056832	0.0318516	DOWN
Prxl2c	31.6006	-0.6435	0.168104	-3.82798	0.0001292	0.0127667	DOWN
Ptpre	21.0618	-0.872974	0.250313	-3.48754	0.00048749	0.0294535	DOWN
Pygm	8.22148	-1.67566	0.409236	-4.0946	4.23e-05	0.00552337	DOWN
Rab3b	24.7508	-1.88724	0.417643	-4.51879	6.22e-06	0.0017046	DOWN
Rai1	8.18185	-0.977691	0.27104	-3.60718	0.00030954	0.0218279	DOWN
Ralgps2	164.844	-0.674229	0.131303	-5.13492	2.82e-07	0.00017665	DOWN
Rcn3	69.9269	-1.13476	0.269331	-4.21325	2.52e-05	0.00396674	DOWN
Reep5	80.9767	-0.647526	0.141026	-4.59154	4.4e-06	0.00132175	DOWN
Retreg2	21.1356	-0.637835	0.178403	-3.57526	0.00034988	0.0236868	DOWN
Rgs10	23.5478	-1.26107	0.347407	-3.62997	0.00028346	0.0206593	DOWN
Rhoh	46.7947	-0.719251	0.163654	-4.39496	1.11e-05	0.00252141	DOWN
Rin3	81.4204	-1.40188	0.323752	-4.3301	1.49e-05	0.00309066	DOWN
Rrbp1	119.528	-1.13283	0.303099	-3.7375	0.00018586	0.0164235	DOWN
Rtl5	2.9134	-1.94845	0.581045	-3.35335	0.00079841	0.0388287	DOWN
Runx2	2.40201	-2.28728	0.700867	-3.2635	0.00110044	0.047496	DOWN
Sbk1	53.8445	-0.969757	0.28599	-3.39087	0.00069671	0.0355936	DOWN
Scimp	16.2787	-1.31524	0.367659	-3.57733	0.00034713	0.0236868	DOWN
Sel1l	110.313	-0.775199	0.215419	-3.59857	0.00031998	0.0222502	DOWN
Senp7	17.9307	-0.690811	0.199524	-3.46229	0.00053559	0.0311806	DOWN
Serinc5	6.81879	-2.00894	0.496643	-4.04504	5.23e-05	0.00643365	DOWN
Slc44a4	4.05853	-2.00195	0.549161	-3.64547	0.00026691	0.0200447	DOWN
Slc9a3r2	4.92318	-2.39998	0.683878	-3.50936	0.00044918	0.0279945	DOWN
Sparc	12.2734	-3.69056	0.622609	-5.92757	3.07e-09	9.24e-06	DOWN
Spata2l	5.61919	-1.13114	0.327385	-3.45507	0.00055015	0.0314493	DOWN
Sptb	4.29022	-2.41458	0.568198	-4.24953	2.14e-05	0.00374192	DOWN
Ssbp3	12.8083	-1.14315	0.296774	-3.85194	0.00011719	0.0118928	DOWN
St6gal1	50.0858	-1.05796	0.246422	-4.2933	1.76e-05	0.00338991	DOWN
Sytl1	19.5037	-1.97431	0.341142	-5.78736	7.15e-09	1.34e-05	DOWN
Tcirg1	39.4152	-0.642545	0.167468	-3.83683	0.00012463	0.0124907	DOWN
Thbd	1.00206	-3.75784	1.14883	-3.271	0.00107168	0.0468166	DOWN
Tmco3	21.6417	-0.622842	0.184257	-3.38028	0.00072412	0.0363754	DOWN
Tmem163	34.1813	-0.804747	0.16758	-4.80216	1.57e-06	0.00063815	DOWN
Tmem51	11.0449	-3.20775	0.575088	-5.57785	2.44e-08	3.33e-05	DOWN
Tubb2b	26.4266	-1.71273	0.279158	-6.13534	8.5e-10	6.38e-06	DOWN
Twsg1	39.5998	-0.828278	0.241427	-3.43075	0.00060191	0.0327	DOWN
Wdr26	32.1405	-0.675184	0.18416	-3.66629	0.00024609	0.0185928	DOWN
Wfdc21	10.356	-2.94595	0.699409	-4.21206	2.53e-05	0.00396674	DOWN
Xrcc1	95.9533	-0.861111	0.260736	-3.30262	0.00095787	0.0438632	DOWN
Yae1d1	18.8698	-0.714061	0.218912	-3.26186	0.00110686	0.0476361	DOWN
Yy1	37.129	-0.698344	0.19414	-3.59712	0.00032176	0.0222709	DOWN
Zbtb7c	1.63323	-3.06869	0.752532	-4.07782	4.55e-05	0.00583928	DOWN
Zcwpw1	75.2733	-1.49171	0.401843	-3.71217	0.00020549	0.0174376	DOWN
Zeb2	40.1356	-0.956941	0.214022	-4.47123	7.78e-06	0.00204935	DOWN
